# Supplementary material for: Role of identified proteins in the proteome profiles of CDK4/6 inhibitor-resistant breast cancer cell lines
Source: Royal Society of Chemistry journal article supplement (doi:10.1039/d2mo00285j), 2023-03-07
Supplement: d2mo00285j4.xlsx [file d2mo00285j4.xlsx]

## Sheet: Supplimentary Table 1
Supplementary Table - 1: List of genes and their primer sequences*.
Gene Name	Primer’s Sequences	Sequence Id*
ESR1	AAGTGCATGTTCCTGTTCTC	XM_017010377.1
	GTGCTGTGCTGATATTTGGT
CDK4	TTGTCCCTTTCCCTACCTTT	NM_000075.3
	CCCTTCTTCCAAGTGGTTTT
CDK6	AGCAGTGGTGAACTGAAAAG	NM_001145306.1
	AACAGAAACTAGCAGGGACA
MDR1	ATCTTATGCTCTGGCCTTCT	AF016535.1
	AGATGCCTGTCCAACACTAA
ABCG2	AGCACACAAAAGCCTACTCA	NM_001257386.2
	CAGCAACAGAGGGAAATACA
BCL2	CGATCTGGAAATCCTCCTAA	XM_017025917.2
	CCATCAATCTTCAGCACTCT
MCL1	GAGCTGGTTTGGCATATCTA	NM_021960.4
	GTCCAACTGCATAAACTGGT
Cyclin-D1	GGATGTTCATAAGGCCAGTA	NM_053056.2
	AAGGTTTGTGTGTGTGTGTG
CASP-3	GGCGTGTCATAAAATACCAG	NM_004346.3
	ACAAAGCGACTGGATGAA
BAX	CTTGGACTGTGTTTTTCCTC	XM_017027077.1
	TTTATTACCCCCTCAAGACC
BAD	GCCTATGCAAAAAGAGGAT	NM_032989.2
	GGAAAACCCAAAACTTCC
PARP1	GTTTTGTGTTGTGTCTGTGG	NM_001618.3
	GAATCTCTCTCCAGCCTTTT
18S	GCAATTATTCCCCATGAACG	M10098.1
	GGCCTCACTAAACCATCCAA
*All the Oligo-sequences are designed in Primer 3 tools by using the mRNA sequence obtained from NCBI site for the corresponding gene as mentioned the sequence Id.

## Sheet: Supplimentary Table 2
Supplementary Table – 2: List of down-regulated proteins in Ab-R-MCF-7 and their references.
Down-regulated Protein	Ab-R-MCF-7/MCF-7-fold Change Set-1	Ab-R-MCF-7/MCF-7-fold Change Set-2	Roles of proteins in Cancers therapy resistance as reported	References ID PubMed
SERPINB6	0.438686	0.463325	Lack of expression for HNRNPH1 and SERPINB6 proteins are new candidate biomarkers of colon cancer.Krasnov GS et al 2009.	PMID: 19425502 PMID: 26956414
NUDT5	0.707536	0.691884	Low NUDT5 expression is associated with poor overall survival rates and tumor grade was a factor that influenced the expression level of NUDT5. Wang Y. et al 2017.	PMID: 29113256
S100A9	0.791461	0.495895	Expression of S100A9 is overexpressed in Er-ve, Pr-ve and Her-2 +ve BC means it has inverse relation with hormone +ve cells. Bao YI. et al 2016.	PMID: 26998104
TGM3	0.785178	0.806209	TGM3, as a candidate tumor suppressor, contributes to the carcinogenesis and development of HNC and may serve as a useful biomarker for patients with HNC.Wu X et al 2013.	PMID: 24289313
PEPD	0.818537	0.1488	PEPD inhibites to Her-2 which is found overexpressed in a Breast Cancer subclass. Down-regulation of PEPD may be a reagion to develop a drug resistance in that class of BC.	PMID: 30674653 PMID: 26086037
DLD	0.647585	0.418008	Dihydrolipoamide dehydrogenase DLD proteins were found differentially expressed (down-regulated) in the breast cancer tumor.Abdullah Al-Dhabi N et al 2016.	PMID: 27110560
SERPINB1	0.709619	0.496824	Elevated expression levels of CLMN, SERPINB1, and KLK6 are associated with prolonged relapse-free survival for breast cancer patients.Sheng L. et al 2016. Inhibitory role of SERPINB1 in the migration and invasion of HCC, implying that SERPINB1 might be a potential prognostic indicator of HCC metastasis.Cui X et al 2014.	PMID: 26485663 PMID: 24105272
PDIA4	0.515228	0.277452	Down-regulated PDIA4 predicted DFS and OS.PDIA4, could be therapeutic targets or biomarkers for managing Ovarian Cancer.Yin F et al 2019.	PMID: 30335894
RPIA	0.521825	0.501323	Deregulation of ribose-5-phosphate isomerase A (RPIA) in the pentose phosphate pathway (PPP) is known to promote tumorigenesis in liver, lung, and breast tissues.
ABAT	0.473043	0.159001	Decreased expression of ABAT and STC2 hallmarks ER-positive inflammatory breast cancer and endocrine therapy resistance in advanced disease(Jansen MP et al 2015)	PMID: 25771305
GLB1	0.441386	0.203258	Increased GLB1 is a valuable marker in formalin-fixed paraffin-embedded (FFPE) tissues for the senescence-like phenotype and associates with improved cancer outcomes. Wagner J. et al 2015.	PMID: 25876105
HSPD1	0.615284	0.338689	The novel prognostic marker, EHMT2, is involved in cell proliferation via HSPD1 regulation in breast cancer.Kim SK et al 2019.	PMID: 30365075
ACTN1	0.68265	0.368311	siRNAs targeting CTNNB1, TLN1, VCL, PXN, and ACTN1 genes significantly decreased the tumor burden at all time points. Ashaie MA et al 2019, Increased α-actinin-1 destabilizes E-cadherin-based adhesions and associates with poor prognosis in basal-like breast cancer. Kovac B et al 2018.	PMID: 31269666 PMID: 29742177
PSMB3	0.779322	0.415508	Down-regulation of IDH3A and PSMB3 were revealed as trisomy-associated alterations involved in regulating genome stability.Gemoll T et al 2013.	PMID: 24464829
ATP1B1	0.620752	0.489186	Na(+)-K(+) ATPase B1 can synergize with ADM and reverse drug resistance to ADM in the MCF-7/ADM cell line. Qi YY et al 2009. Altered expression of the genes Atp1b1, CARD 10, KLF4, Spint2, and Acly may play a role in the aggressive phenotype seen in breast cancer Yancy HF et al 2007.	PMID: 19664334 PMID: 17472751
CD276	0.78894	0.504343	B7-H3 (CDC276) is an important immune checkpoint member of the B7 family and inhibits T-cell mediated antitumor immunity. Pizon M et al 2018.	PMID: 30226585
STOM	0.392105	0.558947	Decreased expression of stomatin predicts poor prognosis in HER2-positive breast cancer. Chen CY et al 2016.	PMID: 27577936
M6PR		0.611967	Low-level expression of mannose-6-phosphate receptor (M6PR) correlated with poor patient prognosis in Breast cancer. Esseghir S et al 2006, Caixeiro NJ et al 2013.	PMID: 17054309, PMID: 23686499
PRCP	0.698972	0.614653	The prolyl peptidases PRCP/PREP regulate IRS-1 stability critical for rapamycin-induced feedback activation of PI3K and AKT.
GGCT	0.842055	0.634615	Downregulation of gamma-glutamyl cyclotransferase (GGCT), a critical component of GSH pathway, contribute to chemoresistance in breast cancer. Wang Z et al 2015, Ran R et al 2015.	PMID: 25818003 PMID: 25256603
TUFM	0.482295	0.725769	TUFM downregulation induces epithelial-mesenchymal transition and invasion in lung cancer cells via a mechanism involving AMPK-GSK3β signaling.He K et al 2016.	PMID: 26781467
SELENBP1	0.518987		Low SELENBP1 expression in ER(+) breast cancer patients was significantly associated with poor survival and SELENBP1 levels progressively decreased with advancing clinical stages of breast cancer. Zhang S et al 2013, Wang Y et al 2015.	PMID: 23704933, PMID: 25445402

## Sheet: Supplimentary Table 3
Supplementary Table – 3: List of Up-regulated genes in Ab-R-MCF-7 cells and their references.
Up-regulated Protein	Ab-R-MCF-7/MCF-7 fold Change Set11	Ab-R-MCF-7/MCF-7 fold Change Set-2	Roles of proteins in Cancers therapy resistance as reported.	References from PubMed
SBSN	2.55714	3.45	The association of SBSN expression with progressive stages of cancer development indicates its role in cancer evolution and therapy resistance.Hubackova S et al 2019.	PMID: 30919591 PMID: 29301256
DSC1	1.14721	1.54721	The increased expression of DSC1 can promote the occurrence of HNSCC and is associated with tumor. The increased expression of DSC1 also indicates a poor prognosis of the patients with HNSCC. Wang Y. et al 2016.	PMID: 27601166 PMID: 29798048
LCN1	1.24007	2.26656	Identification of LCN1 as a Potential Biomarker for Breast Cancer by Bioinformatic Analysis Yang Y. et al 2019.	PMID: 31424267
S100A7	1.59014	1.91371	OLFM4, LY6D and S100A7 as potent markers for distant metastasis in estrogen receptor-positive breast carcinoma. Mayama A. et. Al. 2018.	PMID: 30137688
DCD	1.51585	2.08275	DCD levels may increase in early carcinogenesis, particularly among more aggressive forms of breast cancer.Brauer HA et al 2014. Dermcidin exerts its oncogenic effects in breast cancer via modulation of ERBB signaling.Bancovik J. et al 2015.	PMID: 24562771 PMID: 25879571
PIP	2.23201	2.19784	The potential role for prolactin-inducible protein (PIP) as a marker of human breast cancer micrometastasis. Clark JW et al 1999.	PMID: 10576657
GAPDH	2.17716	1.36435	Various study have described GAPDH as a regulator of cell death and suggested that GAPDH participates in tumorprogression.Zhang JY et al 2015.	PMID: 25859407
IGHG1		3.24581	IGHG1 provided high prognostic value in TNBC for both OS and DFS, representing an easily measurable molecular prognostic marker.Yeong J et al 2018	PMID: 29899747
IGLL5		2.56075	Rearrangements occurring in IGLL5 might be linked to the process of metastasis. Feng Liang et al 2015	PMID: 26311227
A2M	2.28018	1.67312	This study showed a strong association of FN1, A2M, C4BPA and CFB In molecular subtypes of BC, in which, C4BPA and A2M demonstrated a potent signature in blood plasma and tissue samples of LB and TN subtypes in BC patients, respectively.Suman S et al 2016.	PMID: 27498393
HABP2	2.94652	4.41176	HABP2 and LINC01483 represent putative new breast cancer susceptibility loci, because both loci were associated with breast cancer. Brand JS et al 2017.	PMID: 29665850
PEBP1		15.659	Downregulation of RKIP plays an important role in the breast neoplastic progression and correlates with poor prognosis in patients with BC. Kim GE et al 2017.	PMID: 26894644
MUC1	1.80296		The combination therapy based on anti‑MUC1 antibody and novel OM‑86II inhibited the proliferation of MCF‑7 breast cancer cells. Gornowicz A et al 2019.	PMID: 31524251
PSMA6		2.13409	mRNA expression levels of PSMA1-7 were significantly upregulated in breast, lung, gastric, bladder and head and neck cancer compared with normal tissues.Li Y et al 2017	PMID: 27966459
ETFDH	2.28618	2.60197	Expression of RTN4, SON, IGF1R, SNRPE, PTGR1, PLEK, and ETFDH was associated with a decrease in survival time of Bladder cancer patient.Tapak L et al 2015.	PMID: 25907251
VTN	1.83511		VEGFR2 positively regulate the expression of VTN in gastric cancer. VTN promoted the growth and metastasis of gastric cancer cells, VTN act as a poor prognostic factor both for disease-free survival and overall survival in gastric cancer. Lian L et al 2019.	PMID: 30819137
HIST1H4A	1.65891	1.93798	HIST1H4A was found to be expressed in exosomes at more than 5-fold higher level as compared to total cellular membrane proteins in Non-Small Cell Lung Carcinoma Cells.Pan D et al 2019.	PMID: 30646616
HSP90B1		1.54469	The overexpression of Hsp90B1 is associated with tumorigenesis of canine mammary glands. Sunil Kumar BV et al 2018.	PMID: 28801701 PMID: 22363530
			Proteomic analyses reveal high expression of decorin and endoplasmin (HSP90B1) are associated with breast cancer metastasis and decreased survival.Cawthorn TR et al 2012.
TXNRD1		5.41954	Overexpression of TXNRD1 is associated with breast cancer progression. Shin B. et al 2019. TXNRD1 and TXNIP are associated with prognosis in breast cancer, and ERBB2 seems to be one of the factors shifting balances of both factors of the redox control system in a prognostic unfavorablemanner.Cadenas C et al 2010.	PMID: 31430859 PMID: 20584310
KDELR1		2.20192	NPAS2 is a risk biomarker in human cancers and plays a role in tumorigenesis by affecting cancer-related gene expression, and relevant biological pathways. NPAS2 promote the expression of KDELR1 gene have a known role in tumorigenesis. Yi CH et al 2009.	PMID: 19457610
SERPINH1		1.75696	HSP47 is encoded by the SERPINH1 gene, the altered expression levels of HSP47 have been correlated with several types of cancer, such as cervical, breast, pancreatic and gastric cancers. Studies have shown that HSP47 promotes tumor angiogenesis, growth, migration and metastatic capacity. Duarte BDP et al 2018.Clinically, increased expression of Hsp47 and reduced levels of miR-29b and -29c were as…	PMID: 30128672 PMID: 25744716
SLC38A1	1.78899	4.55505	The cross-talk between Akt signaling and SNAT1/SLC38A1 might play a critical role in the development and progression of breast cancer. SNAT1 was up-regulated in breast cancer cell lines and breast cancer tissues.Wang K et al 2013.	PMID: 23848995
AHCY	1.53778	1.30128	Down-regulation of AHCY effectively suppressed cell proliferation by regulating the MEK/ERK signaling pathway and through cell cycle arrests at G2/M phase. Park SJ et al 2015.	PMID: 26328244
HSD17B10	1.88919		HSD17B10 gene expression was up-regulated in poor responders and that immunohistochemistry expression of HSD17B10 on biopsy before treatment was correlated to response to chemotherapy. Salas S et al 2009. Overexpression of HSD10 accelerates pheochromocytoma cell growth, enhances cell respiration, and increases cellular resistance to cell death induction. Carlson EA et al 2015.	PMID: 19449377 PMID: 25879199
CNDP2	2.24242		Knockdown of CNDP2 can inhibit the proliferation of colon cancer in vitro and retarded carcinogenesis in vivo. Xue C et al 2014.	PMID: 24885395
SLC2A1	2.21429		High GLUT1 expression is associated with increased malignant potential, invasiveness and poor prognosis in some cancers including breast cancer.de Castro TB et al 2018.	PMID: 30360728
PSMB4	1.59978		PSMB4 overexpression enhances the cell growth and viability of breast cancer cells leading to a poor prognosis.Wang H et al 2018.	PMID: 30066880
CD9	2.22521	1.39603	Within the tumor microenvironment, CD9 is responsible for the crosstalk between BMMSCs and HCC1806 breast cancer cells (via CCL5, CCR5, and CXCR12) which contributes to chemoresistance. Ullah M et al 2019.	PMID: 31191817
MAL2	1.36028	1.55704	MAL2 promotes proliferation, migration, and invasion through regulating epithelial-mesenchymal transition in breast cancer cell lines.Bhandari A et al 2018.	PMID: 30195491
NAGLU	1.45813	1.61612	Overexpression of NAGLU-IKZF3 enhanced migration of CRC cells. Choi Y et al 2018.	PMID: 29955133
MT-ND4		1.62234	Mutations in MT-ND4 and mtDNA depletion have been reported to be involved in cisplatin resistance. van Gisbergen MW et al 2015.	PMID: 26041263
PDIA3		3.15212	PDIA3 expression is associated with tumor proliferation and decreased apoptosis in HCC, and that increased expression of PDIA3 predicts poor prognosis. Takata H. et al 2016.	PMID: 28101228
PPP1CA		3.56963	USP11 promotes growth and metastasis of colorectal cancer via PPP1CA-mediated activation of ERK/MAPK signaling pathway. Sun H. et al 2019.	PMID: 31521612
ATP1A1		3.76407	overexpression of the ATP1A1 and down-regulation of the ATP1A2 in Breast cancer.Alexey Bogdanov. et al 2017	PMID: 28529692
CLPTM1		3.77667	Single nucleotide polymorphisms (SNPs) in genes encoding telomere-associated proteins (RTEL1 and TERT-CLPTM1) as markers of cancer risk. Mirabello L et al 2010.	PMID: 20597107
HPRT1	28	53.0211	HPRT1 is a common salvage housekeeping gene with a historically important role in cancer as a mutational biomarker. Michelle H Townsend et al 2018.	PMID: 29730818

## Sheet: Supplimentary Table 4
Supplementary Table – 4: List of down-regulated Proteins in Pb-R-MCF-7 cells and their references.
Down-regulated Protein	Pb-R-MCF-7/MCF-7 fold Change Set-1	Pb-R-MCF-7/MCF-7 fold Change Set-2	Roles of proteins in Cancers therapy resistance as reported	References ID PubMed
NUDT5	0.220657	0.284038	Low NUDT5 expression is associated with poor overall survival rates and tumor grade was a factor that influenced the expression level of NUDT5. Wang Y. et al 2017.	PMID: 29113256
AMY1A	0.703419	0.305513	AMY1A is a stem cell differentiation marker were found downregulated.Srinivasan PP. et al. 2017	PMID:28170182
S100A9		0.306744	Expression of S100A9 is over-erexpressed in in Er-ve, Pr-ve and Her-2 +ve BC means it has inverse relation with hormone p+ve cells. Bao YI. et al 2016.	PMID: 26998104
CAT	0.251559	0.442827	Catalase expression in MCF-7 breast cancer cells is mainly controlled by PI3K/Akt/mTorsignaling pathway. Glorieux C. et. al 2014	PMID: 24630930
TGM3	0.205263	0.548947	TGM3, as a candidate tumor suppressor, contributes to the carcinogenesis and development of HNC and may serve as a useful biomarker for patients with HNC.Wu X et al 2013.	PMID: 24289313
PEPD	0.282805	0.59276	PEPD inhibites to Her-2 which is found overexpressed in a Breast Cancer subclass. Down-regulation of PEPD may be a reagion to develop a drug resistance in that class of BC.	PMID: 30674653 PMID: 26086037
DLD	0.383051		Dihydrolipoamide dehydrogenase DLD proteins were found differentially expressed (down-regulated) in the breast cancer tumor.Abdullah Al-Dhabi N et al 2016.	PMID: 27110560
GGCT		0.618105	Downregulation of gamma-glutamyl cyclotransferase (GGCT), a critical components of GSH pathway, contribute to chemoresistance in breast cancer. Wang Z et al 2015, Ran R et al 2015.

## Sheet: Supplimentary Table 5
Supplementary Table – 5: List of Proteins up-regulated in Pb-R-MCF-7 cells and their references.
Up-regulated Protein	Pb-R-MCF-7/MCF-7 fold Change Set-1	Pb-R-MCF-7/MCF-7 fold Change Set-2	Roles of proteins in Cancers therapy resistance as reported	References ID PubMed
S100A7	1.55978		OLFM4, LY6D and S100A7 as potent markers for distant metastasis in estrogen receptor-positive breast carcinoma. Mayama A. et. Al. 2018.	PMID: 30137688
HSPB1	3.38667		The nuclear expression of phosphorylated and non-phosphorylated forms of the chaperone HspB1 is a marker of tumor cells associated with lymphatic metastasis of breast cancer.Kaigorodova EV et al 2015.	PMID: 25519015
GAPDH	1.6		Various study have described GAPDH as a regulator of cell death and suggested that GAPDH participates in tumorprogression.Zhang JY et al 2015.	PMID: 25859407
IGHG1	2.42857		IGHG1 provided high prognostic value in TNBC for both OS and DFS, representing an easily measurable molecular prognostic marker.Yeong J et al 2018	PMID: 29899747
ANXA2	2.24113		1. AnxA2 is overexpressed in TNBC, implicating AnxA2 as a contributor to the aggressive biology of TNBC in AA women.Gibbs LD et al 2019 2. Tyr23 phosphorylation of Anxa2 enhances STAT3 activation and promotes proliferation and invasion of breast cancer cells. Yuan J et al 2017.	PMID: 30478786 .PMID: 28470457
IGLL5	1.67456		Rearrangements occurring in IGLL5 might be linked to the process of metastasis. Feng Liang et al 2015	PMID: 26311227
HSPA8	1.56944		HSPA8 intronic 1541-1542delGT polymorphisms as potential risk factors and/or prognostic markers for breast cancer. Zagouri F et al 2012.	PMID: 23065205
VCL		1.45349	Vinculin is a cytoskeletal protein associated with cell-cell and cell-matrix junctions. Loss of LSD1 (Tumor suppressor gene) also reduce the expression of VCL gene in breast cancer. Hu X et al 2019	PMID: 31409898
MUC1		1.46226	The combination therapy based on anti‑MUC1 antibody and novel OM‑86II inhibited the proliferation of MCF‑7 breast cancer cells. Gornowicz A et al 2019.	PMID: 31524251
GAPDHS		1.46862	GAPDH is a key glycolytic proteins were found with higher expression and poor prognosis. He Y. et al 2019.	PMID: 31184216
P4HB	2.15942	1.52174	Prolyl-4-hydrolase beta-isoform (P4HB)) were found to be up-regulated in HER-2/neu-positive breast tumors. Zhang D et al 2005.	PMID: 16048908
H2A	2.17551	1.66939	TRIM37 is a breast epithelial oncogene encoding a histone H2A ubiquitin ligase in breast cancer. Hu X et al 2019.	PMID: 31409898
GOT1		1.85075	Glutamate oxaloacetate transaminase 1 (GOT1) regulates cellular metabolism through coordinating the utilization of carbohydrates and amino acids to meet nutrient requirements. GOT1 is crucial to provide oxaloacetate at low glucose levels, likely to maintain the redox homeostasis. Our data suggest GOT1 as a possible target in cancer therapy.Zhou X et al 2018.	PMID: 29751795
FLNA		1.99458	FLNa mRNA and protein were overexpressed in breast cancer tissues, which was associated with advanced stage, lymph node metastasis and vascular or neural invasion of breast cancer, suggesting that FLNa contributes to breast cancer development and progression.Tian HM et al 2013.	PMID: 24137390
CD47		2.02747	High expression of CD47 in triple negative breast cancer is associated with epithelial-mesenchymal transition and poor prognosis.(Yuan J. et al 2019).	PMID: 31452802
PSMA3		2.05357	Proteasome subunit α type-3 (PSMA3) showed the highest level in plasma of cholangiocarcinoma patients compared to normal and hepatocellular carcinoma patients by immunodetection, and is of interest as a potential biomarker for cholangiocarcinoma. Verathamjamras C. et al 2017.	PMID: 28560424
SERPINC1	1.66024	2.12982	Expression levels of SERPINC1 mRNA and protein were increased in NPC tumor tissues compared with in adjacent healthy tissues. Downregulation of SERPINC1 reduced the phosphorylation of phosphatidylinositol 3‑kinase (PI3K), protein kinase B (Akt) and mammalian target of rapamycin (mTOR).Xu J. et al 2019.	PMID: 30896875
HIST1H2BN	2.72535	2.14789	Hypomethylation of ATG4A and HIST1H2BN in OTICs predicts a poor prognosis for ovarian cancer patients.(Liao YP. Et al 2014).	PMID: 24256813
KRT18		2.3913	KRT18 gene was highly expressed in DCIS samples with IBC. Doebar SC et al 2017.	PMID: 28634007
RPS27A		2.41467	UBA52, RPS27A, MAPK1, UBC, and UBB. UBA52, RPS27A, and MAPK1 genes were verified by the bioinformatics analysis to be related to the progression and metastasis of GC.Tian X. et al 2019.	PMID: 31081222
PSMB1		2.41667	Analyses of the IXA-binding proteasome subunits PSMB5 and PSMB1 show increased PSMB5 expression and activity in all IXA-resistant MM cells, and upregulated PSMB1 expression in IXA-resistant AMO1 cells. Brünnert D et al 2019. In women with early recurrence, we identified seven upregulated genes (TMPRSS4, MASP1/3, SPC18, PSMB1, IGFBP2, CFI - encoding Complement Factor I - and MMP9). Trudel D et al …	PMID: 30954557 , PMID: 30987833 PMID: 25702669
SERPINB1	1.5	2.44541	Elevated expression levels of CLMN, SERPINB1, and KLK6 are associated with prolonged relapse-free survival for breast cancer patients.Sheng L. et al 2016. Inhibitory role of SERPINB1 in the migration and invasion of HCC, implying that SERPINB1 might be a potential prognostic indicator of HCC metastasis.Cui X et al 2014.	PMID: 26485663 PMID: 24105272
HSD17B4	2.20792	2.69307	17β-hydroxysteroid dehydrogenase type 4 (HSD17B4) catalyzes the conversion of estradiol (E2) to estrone (E1), and is associated with the pathogenesis and development of various cancers.Zhang Y et al 2017	PMID: 28296597
PSMA6		2.75238	mRNA expression levels of PSMA1-7 were significantly upregulated in breast, lung, gastric, bladder and head and neck cancer compared with normal tissues.Li Y et al 2017	PMID: 27966459
APOD		2.76735	ApoD(CN )expression correlated with lymph node metastases. Søiland H et al 2009.	PMID: 18330697
SERPINF2	2.09052	2.79598	Alpha-1 antitrypsin (SERPINA1) was identified as candidate biomarkers for early diagnosis of B-ALL, as they were upregulated in the B-cell acute lymphoblastic leukemia. Cavalcante Mde S et al 2016.	PMID: 26823978
SNRPD3		2.80105	VASN, SNRPD3 genes and gene modules, targeted by POLR2C, CHMP1B and TAF9, which might be novel breast cancer-related biomarkers. Zhang Y et al 2015.	PMID: 26282201
ERMP1		2.9705	ERMP1 could act as a molecular starter to the survival response induced by extracellular stresses. Grandi A et al 2016. ERMP1 and IL33 are overexpressed independent of the copy number increase in breast cancer.Wu J et al 2012.	PMID: 27566589 PMID: 21666724
IQGAP1	1.88208	3.06604	IQGAP1 plays an important role in the cell proliferation and invasion of human breast cancer cells, thus indicating that IQGAP1 may be a potential therapeutic target for the treatment of human breast cancer. Zeng F et al 2018. miR-506 acts as a tumor suppressor, at least partially, by directly downregulating IQGAP1 in breast cancer cells.Sun G et al 2015.	PMID: 29779034 PMID: 26398880
LMNA	5.25455	3.21818	lamin A/C plays a role in breast cancer and loss of its expression is associated with variables of poor prognosis and shorter outcome.Alhudiri IM et al 2019.	PMID: 30610489
ETFDH	9.30942	3.43049	Expression of RTN4, SON, IGF1R, SNRPE, PTGR1, PLEK, and ETFDH was associated with a decrease in survival time of Bladder cancer patient.Tapak L et al 2015.	PMID: 25907251
KIAA1324	1.57522	3.46903	KIAA1324 could be involved in tumor progression and metastasis either by its expression level or through variable expression of alternative splice products. Bauer M et al 2004.	PMID: 14767521
GSR	1.93061	3.56327	The BTMG recurrences were noted predominantly in women--carriers of mutant alleles with polymorphism rs8190924 of gene GSR and AA rs3763511--of gene DKK4. Usenko OY et al 2015.	PMID: 26419038
PSMA4		3.58065	A potential association between PSMA4 variants and lung cancer risk in Chinese Han population.Wang T et al 2015.	PMID: 25744645
SOD2		3.87994	MiR-509-5p exerted tumor-suppressive effects on breast cancer progression and metastasis via targeting SOD2 in vitro, which provided an innovative and candidate target for diagnose and treatment of breast cancer.Song YH et al 2017.	PMID: 28925482
VTN	2.43658	3.9174	VEGFR2 positively regulate the expression of VTN in gastric cancer. VTN promoted the growth and metastasis of gastric cancer cells, VTN act as a poor prognostic factor both for disease-free survival and overall survival in gastric cancer. Lian L et al 2019.	PMID: 30819137
PDIA4		3.92361	Down-regulated PDIA4 predicted DFS and OS.PDIA4, could be therapeutic targets or biomarkers for managing Ovarian Cancer.Yin F et al 2019.	PMID: 30335894
MDH2		3.95288	Differential expression pattern for glycolytic enzymes (as for example MDH2, PGK1, TKT, Aldolase1) were found in triple negative breast cancer.Schulz DM et al 2009.	PMID: 19485423
PSMB5		4.14286	Proteasome subunit beta 5 (PSMB5), the key regulator of proteasome function, was overexpressed in TNBC tissue and predictive of poor prognosis. PSMB5 is associated with proliferation and drug resistance in triple-negative breast cancer. Wei W et al 2018.	PMID: 28623645
NCSTN	1.81569	4.30588	Increased NCSTN mRNA levels by RNA in situ hybridization (RNAScope) in a large cohort of oestrogen receptor negative breast cancers, conferring independent prognostic significance for disease-free survival, in multivariate analysis.Filipović A et al 2014.	PMID: 25248409
PM20D1	3.90094	4.35377	PM20D1 with hypermethylation of CpG islands may be associated with the energy expenditure of patients with AML. Huang J et al 2018. Increased circulating PM20D1 have augmented respiration and increased N-acyl amino acids in blood, administration of N-acyl amino acids to mice improves glucose homeostasis and increases energy expenditure.Long JZ et al 2016.	PMID: 29207054 PMID: 27374330
ENO1	2.23729	4.40678	α-enolase (ENO1) and Myc promoter-binding protein-1 (MBP-1) also played pivotal roles in tumorigenesis, although as antagonists. ENO1 is involved in cell growth, hypoxia tolerance and autoimmune activities besides its major role in the glycolysis pathway.Cancemi P et al 2019. Protein levels of nucleophosmin (NPM), α-enolase (ENO1) and vimentin (VIM) were upregulated in in methotrexate-resistant h…	PMID: 31416219PMID: 24736981
PKM	2.57759	4.41379	Pyruvate kinase muscle (PKM) is a rate-limiting enzyme in the final step of glycolysis. Herein, reported that PKM is a potential therapeutic target in triple-negative breast cancer (TNBC) cells and found that PKM1 or PKM2 is highly expressed in TNBC tissues or cells. Ma C et al 2019. Oncoprotein HBXIP induces PKM2 via transcription factor E2F1 to promote cell proliferation in ER-positive breast c…	PMID: 31564074 PMID: 29925919
HBB	8.46154	4.69231	HBB expression increases breast cancer cells aggressiveness and associates with poor prognosis, pointing to HBB as a novel biomarker for breast cancer progression.Ponzetti M et al 2014, Pau Ni IB et al 2010.	PMID: 28772282 PMID: 20097481
LMAN2		4.80276	High tumor expression of LMAN2, FZD4, FZD5, or STT3A was associated with no significant PFS increase after IP compared to IV chemotherapy in ovarian cancer.Seagle BL et al 2016.	PMID: 26883286
FN1	1.80251	4.85817	FN levels were significantly elevated (p< .0001) at all stages of BC, and returned to normal after tumorremoval.Moon PG et al 2016. Knockdown of FN1 reversed mesenchymal morphology, inhibited cell migration and invasion, and sensitized cells to doxorubicin.Yang X et al 2017.	PMID: 27250024 PMID: 28972876
PSMA7		4.98636	PSMA7 exhibited higher expression levels in HCC patients with poor prognosis than those for lower expression via Kaplan-Meier plotter database. Tu J et al 2009.	PMID: 31303768
HIST1H4A	1.69231	5.20513	HIST1H4A was found to be expressed in exosomes at more than 5-fold higher level as compared to total cellular membrane proteins in Non-Small Cell Lung Carcinoma Cells.Pan D et al 2019.	PMID: 30646616
EIF4A2		5.55992	miR-5195-3p might be a potential therapeutic target to reverse chemoresistance in TNBC through its targeting of EIF4A2. Liu M et al 2019.	PMID: 31308851
NPM1	3.36176	6.20294	APE1 and NPM1 protect cancer cells from Pt-compounds cytotoxicity, suggesting a possible improvement of the activity of Pt-based therapy for TNBC, using the NPM1 and APE1 proteins as secondary therapeutic targets. Malfatti MC et al 2019.	PMID: 31307523
FLNB		6.63636	In alternating splicing, skipping of FLNB exon 30 induced EMT by releasing the FOXC1 transcription factor. Moreover, skipping of FLNB exon 30 is strongly associated with EMT gene signatures in basal-like breast cancer patient samples. Li J et al 2018. Copy number variation in 52% and 47.6% genes showed association with ER+ and PR+ status, respectively. 71% of the genes (including ERBB2, CTSV, CD6…	PMID: 30059005 PMID: 30225582
HSP90B1		6.76471	The overexpression of Hsp90B1 is associated with tumorigenesis of canine mammary glands. Sunil Kumar BV et al 2018.	PMID: 28801701 PMID: 22363530
			Proteomic analyses reveal high expression of decorin and endoplasmin (HSP90B1) are associated with breast cancer metastasis and decreased survival.Cawthorn TR et al 2012.
TXNRD1	1.31016	6.94652	Overexpression of TXNRD1 is associated with breast cancer progression. Shin B. et al 2019. TXNRD1 and TXNIP are associated with prognosis in breast cancer, and ERBB2 seems to be one of the factors shifting balances of both factors of the redox control system in a prognostic unfavorablemanner.Cadenas C et al 2010.	PMID: 31430859 PMID: 20584310
GPD2		8.41576	Inhibitors of mitochondrial GPD2 activity elicit anti-proliferative effects on cancer cells.Yuan L et al 2018. The shift in the inflammatory response is modulated by GPD2, which coordinates a shutdown of oxidative metabolism and contributes to the suppression of inflammatory responses. Langston PK et al 2019.	PMID: 29808012 PMID: 31384058
PSMA1		9.06316	mRNA expression levels of PSMA1-7 were significantly upregulated in breast, lung, gastric, bladder and head and neck cancer compared with normal tissues.Li Y et al 2017. Over-expression (>4-fold) of proteins of PSMA1 and SMT3A were observed in breast cancer. tissue. Deng S et al 2007.	PMID: 27966459 PMID: 17004105
PRDX4		9.21304	Peroxiredoxin 4 has the potential of serving as a novel target for multiple cancers.Jia W et al 2019. High mRNA expression of PRDX4/6 was significantly associated with poor overall survival (OS) in BrCa patients. Mei J et al 2019.	PMID: 31311441 PMID: 31402980
ITGAV		9.52465	Potential therapeutic targets (MET, ITGAV, and PDGFRβ) are differentially expressed between subtypes.Pepin F et al 2012. WASL, ITGAV and several additional cytoskeleton-associated molecules as novel invasion-promoting targets of miR-142-3p in breast cancer. Schwickert A et al 2015.	PMID: 22906178 PMID: 26657485
ATP1B3		9.67169	ATP1B3 knockdown significantly inhibited cell proliferation, colony-formation ability, migration, and invasion and increased apoptosis in human gastric carcinoma cell lines. Additionally, knockdown induced cell cycle arrest at the G2/M phase. ATP1B3 silencing decreased the expression of phosphatidylinositol 3-kinase (PI3K), protein kinase B (AKT) and phosphorylated AKT (p-AKT). Li L et al 2017.	PMID: 24236063 PMID: 29137423
VDAC1	2.47222	9.69444	VDAC1 promoted breast cancer proliferation and was associated with a poor prognosis in patients with breast cancer. Yang G et al 2019.	PMID: 31452730
MT-CYB	4.95597	10.0126	The mitochondrial genes MT-ATP6 and MT-CYB were observed to carry the highest number of variants in the study. The proteins encoded by these genes are involved in the structure of the mitochondrial respiration chain, and variants in these genes may impact reactive oxygen species production contributing to carcinogenesis.Blein S et al 2015. n a progressive increase of MT-COI, MT-CYB, MT-ND1, and M…	PMID: 26406445 PMID: 27333991
GOT2		11.18	Eleven key glycolytic proteins were found with higher expression and poor prognosis: GLUT1, SLC2A5, HK1, PFKP, ALDOA, TPI1, GAPDH, PGK1, ENO1, GOT1 and GOT2. He Y et al 2019. Upregulation of GOT2, increases aspartate and alpha ketoglutarate production, leading to rapid cell proliferation of breast cancer cells. Hong R et al 2019.	PMID: 31184216 PMID: 30714292
GLG1		11.7527	RBBP6, GLG1, VPS13A, DCTPP1, HSPA9, HSPA4, ALDOA, and KRT18, were up-regulated in both OCUM-12/SP cells and OCUM-2MD3/SP cells when compared to their corresponding parent cells. Morisaki T et al 2014. Up-regulated expression of GLG1 gene not previously associated with pancreatic adenocarcinoma were observed in this study.Crnogorac-Jurcevic T et al 2001.	PMID: 25379943 PMID: 11704875
SLC25A31	4.37709	12.8353	ANT4 (SLC25A31) enhanced cell growth without impacting mitochondrial network or respiration. Moreover, ANT4 differentially regulated the intracellular levels of hydrogen peroxide without affecting superoxide anion levels. Finally, stable ANT4 overexpression protected cancer cells from lonidamine and staurosporine apoptosis in a manner independent of Bcl-2 expression. Gallerne C et al 2010.	PMID: 20060930
ITGB1		13.6726	β1 Integrin is essential for fascin-mediated breast cancer stem cell function and disease progression. Barnawi R et al 2019. CD31 regulates metastasis by inducing epithelial-mesenchymal transition in hepatocellular carcinoma via the ITGB1-FAK-Akt signaling pathway. Zhang YY et al 2018.	PMID: 30719702 PMID: 29746931
FTH1	2.41353	14.5489	Up-regulated genes in EMT cells compared to MET cells, was the FTH1 gene, a subunit of the ferritin complex, which is associated with the progression of breast cancer and with increased resistance to doxorubicin.Bigagli E et al 2019. iron up-regulated the expression of FTH1 and increased iron in cancer cells and their microenvironment protects cancer cells from immune response in MCF-7 and MDA-MB…	PMID: 31018947 PMID: 28476795
FBP1	5.76596	15.4468	FBP1 is commonly up-regulated in tumor tissues compared with non-tumor tissues regardless of histological type. elevated FBP1 is a critical modulator in breast cancer progression by altering glucose metabolism and the activity of Wnt/β-Catenin pathway.Li K et al 2016.	PMID: 27780144
RAP1B	1.7375	17.8875	In breast cancer, a decrease in Rap1B prenylation and subsequent loss of Rap1B at the plasma membrane decreases cell-cell adhesion and increases cell scattering, which promotes the metastatic phenotype. Protein kinase A (PKA) was recently found to phosphorylate Rap1B and inhibit its prenylation. Wilson JM et al 2015.	PMID: 26209110
KDELR1	2.32468	18.461	NPAS2 is a risk biomarker in human cancers and plays a role in tumorigenesis by affecting cancer-related gene expression, and relevant biological pathways. NPAS2 promote the expression of KDELR1 gene have a known role in tumorigenesis. Yi CH et al 2009.	PMID: 19457610
LAP3	1.51773	19.1489	Leucine aminopeptidase 3 promotes migration and invasion of breast cancer cells through upregulation of fascin and matrix metalloproteinases-2/9 expression.Fang C et al 2019.	PMID: 30417585
HSPA5		20.3125	Elevated expression of heat shock protein 5 (HSPA5) promotes drug resistance and metastasis and is a marker of poor prognosis in breast cancer patients. Chang YW et al 2014.	PMID: 26119938 PMID: 25301734
CS		23.4444	Higher levels of CS expression was positively correlated with worse overall survival of breast cancer patients. Peng M et al 2019.	PMID: 30850587
HEXA		25.9178	Increase in both O-GlcNAcase and lysosomal hexosaminidase activity in breast tumor tissue compared to matched adjacent tissue. Slawson C et al 2001. N-acetyl-beta-glucosaminidase (NAG) activity measured in sera from 129 breast cancer patients was elevated (mean 18.2 units/l) compared with that in sera from 28 healthy women. Luqmani Y et al 1999.Breast cancer invasion is mediated by beta-N-acetylg…	PMID: 11566258 PMID: 10427956 PMID: 21294446
SEC11A		29.3171	Signal peptidase complex 18, encoded by SEC11A, contributes to progression via TGF-α secretion in gastric cancer.Oue N et al 2019. SEC11A Expression Is Associated with Basal-Like Bladder Cancer and Predicts Patient Survival.Shigematsu Y et al 2019	PMID: 31175341 PMID: 31163419
RPIA		30.825	Deregulation of ribose-5-phosphate isomerase A (RPIA) in the pentose phosphate pathway (PPP) is known to promote tumorigenesis in liver, lung, and breast tissues.
SERPINH1		36.5517	HSP47 is encoded by the SERPINH1 gene, the altered expression levels of HSP47 have been correlated with several types of cancer, such as cervical, breast, pancreatic and gastric cancers. Studies have shown that HSP47 promotes tumor angiogenesis, growth, migration and metastatic capacity. Duarte BDP et al 2018.Clinically, increased expression of Hsp47 and reduced levels of miR-29b and -29c were as…	PMID: 30128672 PMID: 25744716
VIM	376.5	38	In tumors, EMT-like transitions may signify a metastatic phenotype and have features in common with cancer stem cells (CSC) which show resistance to chemotherapy. Vimentin expression in tumor cells, fibronectin and MMP-11 in were reliable markers of EMT. Lakhtakia R et al 2017.	PMID: 28526992
SLC38A1		39.4595	The cross-talk between Akt signaling and SNAT1/SLC38A1 might play a critical role in the development and progression of breast cancer. SNAT1 was up-regulated in breast cancer cell lines and breast cancer tissues.Wang K et al 2013.	PMID: 23848995
SLC1A5	3.16667	41.2727	The neutral amino acid transporter solute carrier family 1 member 5 (SLC1A5 or ASCT2) is overexpressed in many cancers. Bröer A et al 2019.	PMID: 30635397
AHCY		80.5714	Down-regulation of AHCY effectively suppressed cell proliferation by regulating the MEK/ERK signaling pathway and through cell cycle arrests at G2/M phase. Park SJ et al 2015.	PMID: 26328244
CTSZ	5.10345	147.621	Double deficiency of Ctsb and Ctsz exerts significant synergistic anticancer effects, whereas the single deficiencies demonstrate at least partial reciprocal compensation.

## Sheet:  Proteome profile (Raw data)
FALSE	High	Master Protein	J3KPF3	4F2 cell-surface antigen heavy chain OS=Homo sapiens OX=9606 GN=SLC3A2 PE=1 SV=1	0	FALSE	59.057	26	13	44	13	1	631	68.1	5.05	822	75.03	8	12	0	445.6	233.5	173.5	23.6	13.8	0.5	3.7	5.8		High	High	High	High	Peak Found	Peak Found	Peak Found	Peak Found	Not Found				6 GN=SLC3A2 PE=1 SV=1			6 GN=SLC3A2 PE	SLC3A2	SLC3A2	SLC3A2	445.6
FALSE	High	Master Protein	A0A087X1N8	Serpin B6 OS=Homo sapiens OX=9606 GN=SERPINB6 PE=1 SV=1	0	FALSE	15.616	17	5	12	5	1	395	44.8	5.68	139	25.35	3	4	0	353.1	154.9	163.6	74.3	117.9	4.4	20.6	11.2		High	High	High	High	High	Peak Found	Peak Found	Peak Found	Not Found				GN=SERPINB6 PE=1 SV=1			GN=SERPINB6 PE	SERPINB6	SERPINB6	SERPINB6	353.1
	Checked	Confidence	Annotated Sequence	Modifications	Modifications in Master Proteins	Contaminant	# Protein Groups	# Proteins	# PSMs	Master Protein Accessions	Positions in Master Proteins	# Missed Cleavages	Theo. MH+ [Da]	# Razor Quan Results	Abundances (Grouped): F1, Sample	Abundances (Grouped): F2, Sample	Abundances (Grouped): F3, Sample	Abundances (Grouped): F4, Sample	Abundances (Grouped): F5, Sample	Abundances (Grouped): F6, Sample	Abundances (Grouped): F7, Sample	Abundances (Grouped): F8, Sample	Abundances (Grouped): F9, Sample	Quan Info	Found in Sample: [S1] F1: Sample	Found in Sample: [S2] F2: Sample	Found in Sample: [S3] F3: Sample	Found in Sample: [S4] F4: Sample	Found in Sample: [S5] F5: Sample	Found in Sample: [S6] F6: Sample	Found in Sample: [S7] F7: Sample	Found in Sample: [S8] F8: Sample	Found in Sample: [S9] F9: Sample	Confidence (by Search Engine): Mascot	Confidence (by Search Engine): Sequest HT	Percolator q-Value (by Search Engine): Mascot	Percolator q-Value (by Search Engine): Sequest HT	Percolator PEP (by Search Engine): Mascot	Percolator PEP (by Search Engine): Sequest HT	XCorr (by Search Engine): Sequest HT	Ions Score (by Search Engine): Mascot	Modifications	Sequence in Protein	Positions in Protein	Modifications	ificatio	ficatio	ficatio	Abundances (Grouped): F7, Sample
	FALSE	High	[K].RTNAENEFVTIKK.[D]			FALSE	1	1	1	P04264	P04264 [277-289]	2	1549.83	0										No Quan Values	Not Found	Not Found	Not Found	Not Found	High	Not Found	Not Found	Not Found	Not Found	High	High	0	0	0.01407	0.001892	3.37	35		K.RTNAENEFVTIKK.D	[277-289]
		Checked	Confidence	Identifying Node	PSM Ambiguity	Annotated Sequence	Modifications	# Protein Groups	# Proteins	Master Protein Accessions	Protein Accessions	# Missed Cleavages	Charge	DeltaScore	DeltaCn	Rank	Search Engine Rank	m/z [Da]	MH+ [Da]	Theo. MH+ [Da]	DeltaM [ppm]	Deltam/z [Da]	Activation Type	MS Order	Isolation Interference [%]	Ion Inject Time [ms]	RT [min]	First Scan	Spectrum File	File ID	Quan Info	XCorr	Ions Score	Contaminant	Identity Strict	Identity Relaxed	Expectation Value	Percolator q-Value	Percolator PEP	Precursor Abundance	Apex RT [min]	Identifying Node			Identifying No	ntifying	tifying	tifying	DeltaM [ppm]
		FALSE	High	Sequest HT (A2)	Selected	[K].RTNAENEFVTIKK.[D]		1	1	P04264	P04264	2	3	0.6973	0	1	1	517.282	1549.83	1549.83	-0.75	-0.00039	HCD (High Energy Collision Dissociation)	MS2	52.7002	37.733	25.495	12370	01082019_Fusion_MASSFIITB_307198_S5.raw	F5		3.37		FALSE				0	0.001892			Sequest HT (A2)			Sequest HT (A2	uest HT	est HT	est HT	-0.75
	FALSE	High	[K].QISNLQQSISDAEQR.[G]			FALSE	1	1	28	P04264	P04264 [418-432]	0	1716.85	0	180.8	104.2	112.7	64.4	94.1	119.5	113.7	110.7			High	High	High	High	High	High	Peak Found	High	Not Found	High	High	0	0	0.01723	9.434e-06	3.78	37		K.QISNLQQSISDAEQR.G	[418-432]					113.7
		Checked	Confidence	Identifying Node	PSM Ambiguity	Annotated Sequence	Modifications	# Protein Groups	# Proteins	Master Protein Accessions	Protein Accessions	# Missed Cleavages	Charge	DeltaScore	DeltaCn	Rank	Search Engine Rank	m/z [Da]	MH+ [Da]	Theo. MH+ [Da]	DeltaM [ppm]	Deltam/z [Da]	Activation Type	MS Order	Isolation Interference [%]	Ion Inject Time [ms]	RT [min]	First Scan	Spectrum File	File ID	Quan Info	XCorr	Ions Score	Contaminant	Identity Strict	Identity Relaxed	Expectation Value	Percolator q-Value	Percolator PEP	Precursor Abundance	Apex RT [min]	Identifying Node			Identifying No	ntifying	tifying	tifying	DeltaM [ppm]
		FALSE	High	Sequest HT (A2)	Unambiguous	[K].QISNLQQSISDAEQR.[G]		1	1	P04264	P04264	0	2	0.6115	0	1	1	858.928	1716.85	1716.85	-0.85	-0.00073	HCD (High Energy Collision Dissociation)	MS2	12.1168	30	43.6232	28127	01082019_Fusion_MASSFIITB_307198_S3.raw	F3		2.96		FALSE				0	1.224e-07	562896832	43.21	Sequest HT (A2)			Sequest HT (A2	uest HT	est HT	est HT	-0.85
		FALSE	High	Sequest HT (A2)	Unambiguous	[K].QISNLQQSISDAEQR.[G]		1	1	P04264	P04264	0	2	0.7209	0	1	1	858.931	1716.85	1716.85	2.19	0.00188	HCD (High Energy Collision Dissociation)	MS2	0	30	43.06	27035	01082019_Fusion_MASSFIITB_307198_S2.raw	F2		3.26		FALSE				0	1.266e-07	428736192	43.3	Sequest HT (A2)			Sequest HT (A2	uest HT	est HT	est HT	2.19
		FALSE	High	Mascot (A5)	Unambiguous	[K].QISNLQQSISDAEQR.[G]		1	1	P04264	P04264	0	2	0.9533	0	1	1	858.931	1716.85	1716.85	2.19	0.00188	HCD (High Energy Collision Dissociation)	MS2	0	30	43.06	27035	01082019_Fusion_MASSFIITB_307198_S2.raw	F2			107	FALSE	53	36	5.52167e-10	0	1.291e-07	428736192	43.3	Mascot (A5)			Mascot (A5)	cot (A5)	ot (A5)	ot (A5)	2.19
		FALSE	High	Mascot (A5)	Unambiguous	[K].QISNLQQSISDAEQR.[G]		1	1	P04264	P04264	0	2	0.913	0	1	1	858.928	1716.85	1716.85	-0.85	-0.00073	HCD (High Energy Collision Dissociation)	MS2	12.1168	30	43.6232	28127	01082019_Fusion_MASSFIITB_307198_S3.raw	F3			92	FALSE	53	35	1.50891e-08	0	1.632e-06	562896832	43.21	Mascot (A5)			Mascot (A5)	cot (A5)	ot (A5)	ot (A5)	-0.85
		FALSE	High	Mascot (A5)	Unambiguous	[K].QISNLQQSISDAEQR.[G]		1	1	P04264	P04264	0	2	1	0	1	1	858.929	1716.85	1716.85	0.07	6e-05	HCD (High Energy Collision Dissociation)	MS2	43.5418	30	42.863	26883	01082019_Fusion_MASSFIITB_307198_S5.raw	F5			86	FALSE	53	35	5.74926e-08	0	4.878e-06	369541184	43.09	Mascot (A5)			Mascot (A5)	cot (A5)	ot (A5)	ot (A5)	0.07
		FALSE	High	Sequest HT (A2)	Unambiguous	[K].QISNLQQSISDAEQR.[G]		1	1	P04264	P04264	0	2	0.6321	0	1	1	858.929	1716.85	1716.85	0.07	6e-05	HCD (High Energy Collision Dissociation)	MS2	43.5418	30	42.863	26883	01082019_Fusion_MASSFIITB_307198_S5.raw	F5		2.8		FALSE				0	6.356e-06	369541184	43.09	Sequest HT (A2)			Sequest HT (A2	uest HT	est HT	est HT	0.07
		FALSE	High	Sequest HT (A2)	Selected	[K].QISNLQQSISDAEQR.[G]		1	1	P04264	P04264	0	3	0.6481	0	1	1	572.955	1716.85	1716.85	-0.45	-0.00026	HCD (High Energy Collision Dissociation)	MS2	17.9563	9.292	43.1957	27155	01082019_Fusion_MASSFIITB_307198_S2.raw	F2		3.78		FALSE				0	9.434e-06	125240512	43.3	Sequest HT (A2)			Sequest HT (A2	uest HT	est HT	est HT	-0.45
		FALSE	High	Sequest HT (A2)	Unambiguous	[K].QISNLQQSISDAEQR.[G]		1	1	P04264	P04264	0	2	0.6424	0	1	1	858.931	1716.85	1716.85	1.8	0.00154	HCD (High Energy Collision Dissociation)	MS2	0	30	42.9456	27284	01082019_Fusion_MASSFIITB_307198_S4.raw	F4		3.3		FALSE				0	1.029e-05	408976704	43.17	Sequest HT (A2)			Sequest HT (A2	uest HT	est HT	est HT	1.8
		FALSE	High	Sequest HT (A2)	Unambiguous	[K].QISNLQQSISDAEQR.[G]		1	1	P04264	P04264	0	3	0.5898	0	1	1	572.956	1716.85	1716.85	0.58	0.00033	HCD (High Energy Collision Dissociation)	MS2	36.8719	10.431	43.0469	27376	01082019_Fusion_MASSFIITB_307198_S4.raw	F4		3.73		FALSE				0	1.336e-05	112758000	43.18	Sequest HT (A2)			Sequest HT (A2	uest HT	est HT	est HT	0.58
		FALSE	High	Sequest HT (A2)	Unambiguous	[K].QISNLQQSISDAEQR.[G]		1	1	P04264	P04264	0	2	0.7249	0	1	1	858.929	1716.85	1716.85	0.08	7e-05	HCD (High Energy Collision Dissociation)	MS2	0	30	43.5818	27844	01082019_Fusion_MASSFIITB_307198_S4.raw	F4		3.49		FALSE				0	1.548e-05	408976704	43.17	Sequest HT (A2)			Sequest HT (A2	uest HT	est HT	est HT	0.08
		FALSE	High	Sequest HT (A2)	Unambiguous	[K].QISNLQQSISDAEQR.[G]		1	1	P04264	P04264	0	2	0.6643	0	1	1	858.93	1716.85	1716.85	0.69	0.00059	HCD (High Energy Collision Dissociation)	MS2	9.92605	30	42.9566	27035	01082019_Fusion_MASSFIITB_307198_S1.raw	F1		2.86		FALSE				0	2.002e-05	302616064	43.21	Sequest HT (A2)			Sequest HT (A2	uest HT	est HT	est HT	0.69
		FALSE	High	Mascot (A5)	Unambiguous	[K].QISNLQQSISDAEQR.[G]		1	1	P04264	P04264	0	2	0.8977	0	1	1	858.931	1716.85	1716.85	1.8	0.00154	HCD (High Energy Collision Dissociation)	MS2	0	30	42.9456	27284	01082019_Fusion_MASSFIITB_307198_S4.raw	F4			88	FALSE	54	36	4.10334e-08	0	2.508e-05	408976704	43.17	Mascot (A5)			Mascot (A5)	cot (A5)	ot (A5)	ot (A5)	1.8
		FALSE	High	Sequest HT (A2)	Unambiguous	[K].QISNLQQSISDAEQR.[G]		1	1	P04264	P04264	0	2	0.6934	0	1	1	858.929	1716.85	1716.85	0.24	0.00021	HCD (High Energy Collision Dissociation)	MS2	0	30	60.5098	42688	01082019_Fusion_MASSFIITB_307198_S4.raw	F4		2.87		FALSE				0	2.547e-05	11554388	60.46	Sequest HT (A2)			Sequest HT (A2	uest HT	est HT	est HT	0.24
		FALSE	High	Sequest HT (A2)	Unambiguous	[K].QISNLQQSISDAEQR.[G]		1	1	P04264	P04264	0	2	0.7321	0	1	1	858.929	1716.85	1716.85	0.2	0.00017	HCD (High Energy Collision Dissociation)	MS2	5.86269	30	60.5317	40495	01082019_Fusion_MASSFIITB_307198_S6.raw	F6		2.8		FALSE				0	3.442e-05	7.4328e+06	60.53	Sequest HT (A2)			Sequest HT (A2	uest HT	est HT	est HT	0.2
		FALSE	High	Mascot (A5)	Unambiguous	[K].QISNLQQSISDAEQR.[G]		1	1	P04264	P04264	0	2	0.9615	0	1	1	858.929	1716.85	1716.85	0.08	7e-05	HCD (High Energy Collision Dissociation)	MS2	0	30	43.5818	27844	01082019_Fusion_MASSFIITB_307198_S4.raw	F4			78	FALSE	53	35	3.88698e-07	0	3.546e-05	408976704	43.17	Mascot (A5)			Mascot (A5)	cot (A5)	ot (A5)	ot (A5)	0.08
		FALSE	High	Mascot (A5)	Unambiguous	[K].QISNLQQSISDAEQR.[G]		1	1	P04264	P04264	0	2	1	0	1	1	858.929	1716.85	1716.85	0.24	0.00021	HCD (High Energy Collision Dissociation)	MS2	0	30	60.5098	42688	01082019_Fusion_MASSFIITB_307198_S4.raw	F4			76	FALSE	53	35	5.91033e-07	0	8.476e-05	11554388	60.46	Mascot (A5)			Mascot (A5)	cot (A5)	ot (A5)	ot (A5)	0.24
		FALSE	High	Sequest HT (A2)	Selected	[K].QISNLQQSISDAEQR.[G]		1	1	P04264	P04264	0	3	0.6576	0	1	1	572.955	1716.85	1716.85	-0.02	-1e-05	HCD (High Energy Collision Dissociation)	MS2	3.28551	23.5	43.1287	25976	01082019_Fusion_MASSFIITB_307198_S8.raw	F8		2.95		FALSE				0	0.000112	33270098	43.24	Sequest HT (A2)			Sequest HT (A2	uest HT	est HT	est HT	-0.02
		FALSE	High	Mascot (A5)	Unambiguous	[K].QISNLQQSISDAEQR.[G]		1	1	P04264	P04264	0	2	0.962	0	1	1	858.93	1716.85	1716.85	0.69	0.00059	HCD (High Energy Collision Dissociation)	MS2	9.92605	30	42.9566	27035	01082019_Fusion_MASSFIITB_307198_S1.raw	F1			79	FALSE	53	35	2.88849e-07	0	0.0002017	302616064	43.21	Mascot (A5)			Mascot (A5)	cot (A5)	ot (A5)	ot (A5)	0.69
		FALSE	High	Sequest HT (A2)	Unambiguous	[K].QISNLQQSISDAEQR.[G]		1	1	P04264	P04264	0	3	0.5982	0	1	1	572.955	1716.85	1716.85	-0.26	-0.00015	HCD (High Energy Collision Dissociation)	MS2	33.2394	5.671	43.0831	27650	01082019_Fusion_MASSFIITB_307198_S3.raw	F3		3.41		FALSE				0	0.0002153	133256120	43.21	Sequest HT (A2)			Sequest HT (A2	uest HT	est HT	est HT	-0.26
		FALSE	High	Sequest HT (A2)	Selected	[K].QISNLQQSISDAEQR.[G]		1	1	P04264	P04264	0	3	0.5987	0	1	1	572.955	1716.85	1716.85	0.37	0.00021	HCD (High Energy Collision Dissociation)	MS2	22.9225	29.635	43.0825	25221	01082019_Fusion_MASSFIITB_307198_S6.raw	F6		2.99		FALSE				0	0.000222	48770840	43.27	Sequest HT (A2)			Sequest HT (A2	uest HT	est HT	est HT	0.37
		FALSE	High	Sequest HT (A2)	Unambiguous	[K].QISNLQQSISDAEQR.[G]		1	1	P04264	P04264	0	2	0.5556	0	1	1	858.929	1716.85	1716.85	0.11	9e-05	HCD (High Energy Collision Dissociation)	MS2	0	30	42.9416	27523	01082019_Fusion_MASSFIITB_307198_S3.raw	F3		2.25		FALSE				0	0.0002314	562896832	43.21	Sequest HT (A2)			Sequest HT (A2	uest HT	est HT	est HT	0.11
		FALSE	High	Mascot (A5)	Unambiguous	[K].QISNLQQSISDAEQR.[G]		1	1	P04264	P04264	0	2	1	0	1	1	858.929	1716.85	1716.85	0.11	9e-05	HCD (High Energy Collision Dissociation)	MS2	0	30	42.9416	27523	01082019_Fusion_MASSFIITB_307198_S3.raw	F3			61	FALSE	53	35	2.01193e-05	0	0.0002448	562896832	43.21	Mascot (A5)			Mascot (A5)	cot (A5)	ot (A5)	ot (A5)	0.11
		FALSE	High	Mascot (A5)	Unambiguous	[K].QISNLQQSISDAEQR.[G]		1	1	P04264	P04264	0	2	0.9836	0	1	1	858.929	1716.85	1716.85	0.2	0.00017	HCD (High Energy Collision Dissociation)	MS2	5.86269	30	60.5317	40495	01082019_Fusion_MASSFIITB_307198_S6.raw	F6			61	FALSE	53	35	1.96161e-05	0	0.0003489	7.4328e+06	60.53	Mascot (A5)			Mascot (A5)	cot (A5)	ot (A5)	ot (A5)	0.2
		FALSE	High	Mascot (A5)	Unambiguous	[K].QISNLQQSISDAEQR.[G]		1	1	P04264	P04264	0	3	0.9825	0	1	1	572.956	1716.85	1716.85	0.58	0.00033	HCD (High Energy Collision Dissociation)	MS2	36.8719	10.431	43.0469	27376	01082019_Fusion_MASSFIITB_307198_S4.raw	F4			57	FALSE	53	35	4.43273e-05	0	0.0003619	112758000	43.18	Mascot (A5)			Mascot (A5)	cot (A5)	ot (A5)	ot (A5)	0.58
		FALSE	High	Sequest HT (A2)	Selected	[K].QISNLQQSISDAEQR.[G]		1	1	P04264	P04264	0	3	0.5546	0	1	1	572.955	1716.85	1716.85	0.13	8e-05	HCD (High Energy Collision Dissociation)	MS2	30.9167	23.5	42.9652	26975	01082019_Fusion_MASSFIITB_307198_S5.raw	F5		3.66		FALSE				0	0.0007292	93485064	43.11	Sequest HT (A2)			Sequest HT (A2	uest HT	est HT	est HT	0.13
		FALSE	High	Mascot (A5)	Selected	[K].QISNLQQSISDAEQR.[G]		1	1	P04264	P04264	0	2	0.8	0	1	1	858.927	1716.85	1716.85	-2.06	-0.00176	HCD (High Energy Collision Dissociation)	MS2	0	30	44.8691	29201	01082019_Fusion_MASSFIITB_307198_S3.raw	F3			60	FALSE	53	35	2.24109e-05	0	0.0009259	29322628	44.46	Mascot (A5)			Mascot (A5)	cot (A5)	ot (A5)	ot (A5)	-2.06
		FALSE	High	Mascot (A5)	Unambiguous	[K].QISNLQQSISDAEQR.[G]		1	1	P04264	P04264	0	3	1	0	1	1	572.955	1716.85	1716.85	-0.26	-0.00015	HCD (High Energy Collision Dissociation)	MS2	33.2394	5.671	43.0831	27650	01082019_Fusion_MASSFIITB_307198_S3.raw	F3			62	FALSE	53	35	1.66422e-05	0	0.001638	133256120	43.21	Mascot (A5)			Mascot (A5)	cot (A5)	ot (A5)	ot (A5)	-0.26
		FALSE	High	Mascot (A5)	Selected	[K].QISNLQQSISDAEQR.[G]		1	1	P04264	P04264	0	2	1	0	1	1	858.929	1716.85	1716.85	-0.18	-0.00015	HCD (High Energy Collision Dissociation)	MS2	0	30	45.4705	29741	01082019_Fusion_MASSFIITB_307198_S3.raw	F3			55	FALSE	53	35	7.24674e-05	0	0.003182			Mascot (A5)			Mascot (A5)	cot (A5)	ot (A5)	ot (A5)	-0.18
	FALSE	High	[R].SLDLDSIIAEVKAQYEDIAQK.[S]			FALSE	1	1	4	P04264	P04264 [344-364]	1	2349.22	0	103.8	82.6	54.1	99.1	178.1	240.8	21.6	119.8			Peak Found	High	Peak Found	High	Peak Found	Peak Found	Peak Found	Peak Found	Not Found	High	High	0	0	5.108e-06	3.747e-10	4.43	83		R.SLDLDSIIAEVKAQYEDIAQK.S	[344-364]					21.6
		Checked	Confidence	Identifying Node	PSM Ambiguity	Annotated Sequence	Modifications	# Protein Groups	# Proteins	Master Protein Accessions	Protein Accessions	# Missed Cleavages	Charge	DeltaScore	DeltaCn	Rank	Search Engine Rank	m/z [Da]	MH+ [Da]	Theo. MH+ [Da]	DeltaM [ppm]	Deltam/z [Da]	Activation Type	MS Order	Isolation Interference [%]	Ion Inject Time [ms]	RT [min]	First Scan	Spectrum File	File ID	Quan Info	XCorr	Ions Score	Contaminant	Identity Strict	Identity Relaxed	Expectation Value	Percolator q-Value	Percolator PEP	Precursor Abundance	Apex RT [min]	Identifying Node			Identifying No	ntifying	tifying	tifying	DeltaM [ppm]
		FALSE	High	Sequest HT (A2)	Unambiguous	[R].SLDLDSIIAEVKAQYEDIAQK.[S]		1	1	P04264	P04264	1	3	0.7043	0	1	1	783.745	2349.22	2349.22	0.64	0.0005	HCD (High Energy Collision Dissociation)	MS2	1.43252	30	74.0265	55402	01082019_Fusion_MASSFIITB_307198_S2.raw	F2		4.43		FALSE				0	3.747e-10	36815472	73.84	Sequest HT (A2)			Sequest HT (A2	uest HT	est HT	est HT	0.64
		FALSE	High	Sequest HT (A2)	Unambiguous	[R].SLDLDSIIAEVKAQYEDIAQK.[S]		1	1	P04264	P04264	1	3	0.6319	0	1	1	783.745	2349.22	2349.22	0.61	0.00048	HCD (High Energy Collision Dissociation)	MS2	0	30	74.0273	55071	01082019_Fusion_MASSFIITB_307198_S4.raw	F4		3.45		FALSE				0	1.565e-08	34471468	74.16	Sequest HT (A2)			Sequest HT (A2	uest HT	est HT	est HT	0.61
		FALSE	High	Mascot (A5)	Unambiguous	[R].SLDLDSIIAEVKAQYEDIAQK.[S]		1	1	P04264	P04264	1	3	1	0	1	1	783.745	2349.22	2349.22	0.64	0.0005	HCD (High Energy Collision Dissociation)	MS2	1.43252	30	74.0265	55402	01082019_Fusion_MASSFIITB_307198_S2.raw	F2			87	FALSE	53	35	3.91997e-08	0	1.807e-08	36815472	73.84	Mascot (A5)			Mascot (A5)	cot (A5)	ot (A5)	ot (A5)	0.64
		FALSE	High	Mascot (A5)	Unambiguous	[R].SLDLDSIIAEVKAQYEDIAQK.[S]		1	1	P04264	P04264	1	3	0.988	0	1	1	783.745	2349.22	2349.22	0.61	0.00048	HCD (High Energy Collision Dissociation)	MS2	0	30	74.0273	55071	01082019_Fusion_MASSFIITB_307198_S4.raw	F4			83	FALSE	53	35	9.62238e-08	0	5.108e-06	34471468	74.16	Mascot (A5)			Mascot (A5)	cot (A5)	ot (A5)	ot (A5)	0.61
	FALSE	High	[K].SLNNQFASFIDK.[V]			FALSE	1	1	24	P04264	P04264 [186-197]	0	1383.69	0	127.2	94.6	107.5	107.9	118	142.8	87.8	106.3	7.8		High	High	High	High	High	High	Peak Found	High	Peak Found	High	High	0	0	0.02208	0.0004031	3.18	28		K.SLNNQFASFIDK.V	[186-197]					87.8
		Checked	Confidence	Identifying Node	PSM Ambiguity	Annotated Sequence	Modifications	# Protein Groups	# Proteins	Master Protein Accessions	Protein Accessions	# Missed Cleavages	Charge	DeltaScore	DeltaCn	Rank	Search Engine Rank	m/z [Da]	MH+ [Da]	Theo. MH+ [Da]	DeltaM [ppm]	Deltam/z [Da]	Activation Type	MS Order	Isolation Interference [%]	Ion Inject Time [ms]	RT [min]	First Scan	Spectrum File	File ID	Quan Info	XCorr	Ions Score	Contaminant	Identity Strict	Identity Relaxed	Expectation Value	Percolator q-Value	Percolator PEP	Precursor Abundance	Apex RT [min]	Identifying Node			Identifying No	ntifying	tifying	tifying	DeltaM [ppm]
		FALSE	High	Sequest HT (A2)	Unambiguous	[K].SLNNQFASFIDK.[V]		1	1	P04264	P04264	0	2	0.6944	0	1	1	692.349	1383.69	1383.69	0.65	0.00045	HCD (High Energy Collision Dissociation)	MS2	2.40029	15.774	55.2604	38076	01082019_Fusion_MASSFIITB_307198_S4.raw	F4		2.52		FALSE				0	1.19e-05	1323677696	54.81	Sequest HT (A2)			Sequest HT (A2	uest HT	est HT	est HT	0.65
		FALSE	High	Mascot (A5)	Selected	[K].SLNNQFASFIDK.[V]		1	1	P04264	P04264	0	2	0.7816	0	1	1	692.349	1383.69	1383.69	-0.01	0	HCD (High Energy Collision Dissociation)	MS2	9.96312	30	55.311	35861	01082019_Fusion_MASSFIITB_307198_S6.raw	F6			87	FALSE	53	35	4.31545e-08	0	1.956e-05	361226528	54.85	Mascot (A5)			Mascot (A5)	cot (A5)	ot (A5)	ot (A5)	-0.01
		FALSE	High	Mascot (A5)	Selected	[K].SLNNQFASFIDK.[V]		1	1	P04264	P04264	0	2	0.7407	0	1	1	692.349	1383.69	1383.69	0.33	0.00023	HCD (High Energy Collision Dissociation)	MS2	0	15.356	55.2309	37713	01082019_Fusion_MASSFIITB_307198_S5.raw	F5			81	FALSE	53	35	1.62955e-07	0	2.543e-05	877871040	54.77	Mascot (A5)			Mascot (A5)	cot (A5)	ot (A5)	ot (A5)	0.33
		FALSE	High	Sequest HT (A2)	Unambiguous	[K].SLNNQFASFIDK.[V]		1	1	P04264	P04264	0	2	0.6306	0	1	1	692.349	1383.69	1383.69	0.45	0.00031	HCD (High Energy Collision Dissociation)	MS2	16.6796	24.204	58.7631	41584	01082019_Fusion_MASSFIITB_307198_S3.raw	F3		3.14		FALSE				0	4.61e-05	188898976	58.26	Sequest HT (A2)			Sequest HT (A2	uest HT	est HT	est HT	0.45
		FALSE	High	Mascot (A5)	Selected	[K].SLNNQFASFIDK.[V]		1	1	P04264	P04264	0	2	0.9375	0	1	1	692.351	1383.7	1383.69	3.71	0.00256	HCD (High Energy Collision Dissociation)	MS2	32.3604	30	54.5264	35768	01082019_Fusion_MASSFIITB_307198_S8.raw	F8			64	FALSE	54	36	1.17701e-05	0	6.232e-05	172770224	54.74	Mascot (A5)			Mascot (A5)	cot (A5)	ot (A5)	ot (A5)	3.71
		FALSE	High	Mascot (A5)	Unambiguous	[K].SLNNQFASFIDK.[V]		1	1	P04264	P04264	0	2	0.859	0	1	1	692.349	1383.69	1383.69	0.65	0.00045	HCD (High Energy Collision Dissociation)	MS2	2.40029	15.774	55.2604	38076	01082019_Fusion_MASSFIITB_307198_S4.raw	F4			78	FALSE	54	36	4.42361e-07	0	6.739e-05	1323677696	54.81	Mascot (A5)			Mascot (A5)	cot (A5)	ot (A5)	ot (A5)	0.65
		FALSE	High	Sequest HT (A2)	Unambiguous	[K].SLNNQFASFIDK.[V]		1	1	P04264	P04264	0	2	0.5652	0	1	1	692.35	1383.69	1383.69	2.29	0.00158	HCD (High Energy Collision Dissociation)	MS2	26.2345	30	54.6181	35249	01082019_Fusion_MASSFIITB_307198_S6.raw	F6		2.53		FALSE				0	0.0001063	361226528	54.85	Sequest HT (A2)			Sequest HT (A2	uest HT	est HT	est HT	2.29
		FALSE	High	Sequest HT (A2)	Unambiguous	[K].SLNNQFASFIDK.[V]		1	1	P04264	P04264	0	2	0.557	0	1	1	692.351	1383.69	1383.69	2.56	0.00177	HCD (High Energy Collision Dissociation)	MS2	31.2706	14.254	54.5214	37482	01082019_Fusion_MASSFIITB_307198_S1.raw	F1		2.37		FALSE				0	0.00011	422861120	54.73	Sequest HT (A2)			Sequest HT (A2	uest HT	est HT	est HT	2.56
		FALSE	High	Mascot (A5)	Unambiguous	[K].SLNNQFASFIDK.[V]		1	1	P04264	P04264	0	2	0.8382	0	1	1	692.349	1383.69	1383.69	0.45	0.00031	HCD (High Energy Collision Dissociation)	MS2	16.6796	24.204	58.7631	41584	01082019_Fusion_MASSFIITB_307198_S3.raw	F3			68	FALSE	53	35	3.3734e-06	0	0.0001131	188898976	58.26	Mascot (A5)			Mascot (A5)	cot (A5)	ot (A5)	ot (A5)	0.45
		FALSE	High	Sequest HT (A2)	Selected	[K].SLNNQFASFIDK.[V]		1	1	P04264	P04264	0	2	0.5985	0	1	1	692.348	1383.69	1383.69	-0.55	-0.00038	HCD (High Energy Collision Dissociation)	MS2	0.726489	3.52	54.6825	37628	01082019_Fusion_MASSFIITB_307198_S1.raw	F1		2.69		FALSE				0	0.0001442	422861120	54.73	Sequest HT (A2)			Sequest HT (A2	uest HT	est HT	est HT	-0.55
		FALSE	High	Mascot (A5)	Unambiguous	[K].SLNNQFASFIDK.[V]		1	1	P04264	P04264	0	2	0.8095	0	1	1	692.351	1383.69	1383.69	2.73	0.00189	HCD (High Energy Collision Dissociation)	MS2	28.7927	10.202	54.5479	37096	01082019_Fusion_MASSFIITB_307198_S5.raw	F5			63	FALSE	53	35	1.2469e-05	0	0.0001901	877871040	54.77	Mascot (A5)			Mascot (A5)	cot (A5)	ot (A5)	ot (A5)	2.73
		FALSE	High	Sequest HT (A2)	Unambiguous	[K].SLNNQFASFIDK.[V]		1	1	P04264	P04264	0	2	0.5703	0	1	1	692.351	1383.69	1383.69	2.73	0.00189	HCD (High Energy Collision Dissociation)	MS2	28.7927	10.202	54.5479	37096	01082019_Fusion_MASSFIITB_307198_S5.raw	F5		2.63		FALSE				0	0.0002049	877871040	54.77	Sequest HT (A2)			Sequest HT (A2	uest HT	est HT	est HT	2.73
		FALSE	High	Mascot (A5)	Unambiguous	[K].SLNNQFASFIDK.[V]		1	1	P04264	P04264	0	2	0.8906	0	1	1	692.351	1383.69	1383.69	2.56	0.00177	HCD (High Energy Collision Dissociation)	MS2	31.2706	14.254	54.5214	37482	01082019_Fusion_MASSFIITB_307198_S1.raw	F1			64	FALSE	53	35	9.24339e-06	0	0.0002111	422861120	54.73	Mascot (A5)			Mascot (A5)	cot (A5)	ot (A5)	ot (A5)	2.56
		FALSE	High	Mascot (A5)	Unambiguous	[K].SLNNQFASFIDK.[V]		1	1	P04264	P04264	0	2	0.85	0	1	1	692.351	1383.69	1383.69	2.69	0.00186	HCD (High Energy Collision Dissociation)	MS2	34.1173	8.728	54.5722	37462	01082019_Fusion_MASSFIITB_307198_S4.raw	F4			60	FALSE	53	35	2.40343e-05	0	0.0002509	1323677696	54.81	Mascot (A5)			Mascot (A5)	cot (A5)	ot (A5)	ot (A5)	2.69
		FALSE	High	Sequest HT (A2)	Unambiguous	[K].SLNNQFASFIDK.[V]		1	1	P04264	P04264	0	2	0.5771	0	1	1	692.351	1383.69	1383.69	2.69	0.00186	HCD (High Energy Collision Dissociation)	MS2	34.1173	8.728	54.5722	37462	01082019_Fusion_MASSFIITB_307198_S4.raw	F4		2.53		FALSE				0	0.0003786	1323677696	54.81	Sequest HT (A2)			Sequest HT (A2	uest HT	est HT	est HT	2.69
		FALSE	High	Sequest HT (A2)	Unambiguous	[K].SLNNQFASFIDK.[V]		1	1	P04264	P04264	0	2	0.6352	0	1	1	692.349	1383.69	1383.69	-0.14	-9e-05	HCD (High Energy Collision Dissociation)	MS2	0.104121	0.807	54.7858	37653	01082019_Fusion_MASSFIITB_307198_S4.raw	F4		3.18		FALSE				0	0.0004031	1323677696	54.81	Sequest HT (A2)			Sequest HT (A2	uest HT	est HT	est HT	-0.14
		FALSE	High	Mascot (A5)	Unambiguous	[K].SLNNQFASFIDK.[V]		1	1	P04264	P04264	0	2	0.9048	0	1	1	692.35	1383.69	1383.69	2.29	0.00158	HCD (High Energy Collision Dissociation)	MS2	26.2345	30	54.6181	35249	01082019_Fusion_MASSFIITB_307198_S6.raw	F6			63	FALSE	53	36	1.16756e-05	0	0.0004252	361226528	54.85	Mascot (A5)			Mascot (A5)	cot (A5)	ot (A5)	ot (A5)	2.29
		FALSE	High	Mascot (A5)	Selected	[K].SLNNQFASFIDK.[V]		1	1	P04264	P04264	0	2	0.9123	0	1	1	692.348	1383.69	1383.69	-1.48	-0.00102	HCD (High Energy Collision Dissociation)	MS2	39.1593	30	55.2038	38093	01082019_Fusion_MASSFIITB_307198_S1.raw	F1			57	FALSE	53	36	5.35723e-05	0	0.0008563	422861120	54.73	Mascot (A5)			Mascot (A5)	cot (A5)	ot (A5)	ot (A5)	-1.48
		FALSE	High	Sequest HT (A2)	Unambiguous	[K].SLNNQFASFIDK.[V]		1	1	P04264	P04264	0	2	0.6044	0	1	1	692.351	1383.69	1383.69	3.39	0.00234	HCD (High Energy Collision Dissociation)	MS2	28.9588	6.341	54.5601	37414	01082019_Fusion_MASSFIITB_307198_S2.raw	F2		2.73		FALSE				0	0.0008594	836967168	54.76	Sequest HT (A2)			Sequest HT (A2	uest HT	est HT	est HT	3.39
		FALSE	High	Mascot (A5)	Unambiguous	[K].SLNNQFASFIDK.[V]		1	1	P04264	P04264	0	2	0.8525	0	1	1	692.351	1383.69	1383.69	2.96	0.00205	HCD (High Energy Collision Dissociation)	MS2	27.1098	5.924	54.62	37918	01082019_Fusion_MASSFIITB_307198_S3.raw	F3			61	FALSE	53	35	1.93638e-05	0	0.0009601	877194304	54.79	Mascot (A5)			Mascot (A5)	cot (A5)	ot (A5)	ot (A5)	2.96
		FALSE	High	Mascot (A5)	Unambiguous	[K].SLNNQFASFIDK.[V]		1	1	P04264	P04264	0	2	0.8772	0	1	1	692.351	1383.69	1383.69	3.39	0.00234	HCD (High Energy Collision Dissociation)	MS2	28.9588	6.341	54.5601	37414	01082019_Fusion_MASSFIITB_307198_S2.raw	F2			57	FALSE	53	35	5.00974e-05	0	0.00104	836967168	54.76	Mascot (A5)			Mascot (A5)	cot (A5)	ot (A5)	ot (A5)	3.39
		FALSE	High	Mascot (A5)	Unambiguous	[K].SLNNQFASFIDK.[V]		1	1	P04264	P04264	0	2	0.7636	0	1	1	692.349	1383.69	1383.69	-0.14	-9e-05	HCD (High Energy Collision Dissociation)	MS2	0.104121	0.807	54.7858	37653	01082019_Fusion_MASSFIITB_307198_S4.raw	F4			55	FALSE	53	35	7.15151e-05	0	0.001559	1323677696	54.81	Mascot (A5)			Mascot (A5)	cot (A5)	ot (A5)	ot (A5)	-0.14
		FALSE	High	Sequest HT (A2)	Unambiguous	[K].SLNNQFASFIDK.[V]		1	1	P04264	P04264	0	2	0.609	0	1	1	692.351	1383.69	1383.69	2.96	0.00205	HCD (High Energy Collision Dissociation)	MS2	27.1098	5.924	54.62	37918	01082019_Fusion_MASSFIITB_307198_S3.raw	F3		3.12		FALSE				0	0.002266	877194304	54.79	Sequest HT (A2)			Sequest HT (A2	uest HT	est HT	est HT	2.96
		FALSE	High	Sequest HT (A2)	Selected	[K].SLNNQFASFIDK.[V]		1	1	P04264	P04264	0	2	0.6689	0	1	1	692.348	1383.69	1383.69	-0.53	-0.00037	HCD (High Energy Collision Dissociation)	MS2	0	6.726	54.826	36026	01082019_Fusion_MASSFIITB_307198_S8.raw	F8		2.93		FALSE				0	0.004373	172770224	54.74	Sequest HT (A2)			Sequest HT (A2	uest HT	est HT	est HT	-0.53
	FALSE	High	[K].SLNNQFASFIDKVR.[F]			FALSE	1	1	22	P04264	P04264 [186-199]	1	1638.86	0	111.6	262.5	87.3	252.6	124.1	61.9					High	High	High	High	High	High	Not Found	Not Found	Not Found	High	High	0	0	0.004383	2.093e-07	4.71	20		K.SLNNQFASFIDKVR.F	[186-199]
		Checked	Confidence	Identifying Node	PSM Ambiguity	Annotated Sequence	Modifications	# Protein Groups	# Proteins	Master Protein Accessions	Protein Accessions	# Missed Cleavages	Charge	DeltaScore	DeltaCn	Rank	Search Engine Rank	m/z [Da]	MH+ [Da]	Theo. MH+ [Da]	DeltaM [ppm]	Deltam/z [Da]	Activation Type	MS Order	Isolation Interference [%]	Ion Inject Time [ms]	RT [min]	First Scan	Spectrum File	File ID	Quan Info	XCorr	Ions Score	Contaminant	Identity Strict	Identity Relaxed	Expectation Value	Percolator q-Value	Percolator PEP	Precursor Abundance	Apex RT [min]	Identifying Node			Identifying No	ntifying	tifying	tifying	DeltaM [ppm]
		FALSE	High	Sequest HT (A2)	Unambiguous	[K].SLNNQFASFIDKVR.[F]		1	1	P04264	P04264	1	3	0.6611	0	1	1	546.958	1638.86	1638.86	-0.18	-0.0001	HCD (High Energy Collision Dissociation)	MS2	0	30	55.5731	38315	01082019_Fusion_MASSFIITB_307198_S2.raw	F2		4.22		FALSE				0	9.706e-08	835750080	55.91	Sequest HT (A2)			Sequest HT (A2	uest HT	est HT	est HT	-0.18
		FALSE	High	Sequest HT (A2)	Selected	[K].SLNNQFASFIDKVR.[F]		1	1	P04264	P04264	1	3	0.7176	0	1	1	546.958	1638.86	1638.86	0.07	4e-05	HCD (High Energy Collision Dissociation)	MS2	4.83964	30	65.2619	47326	01082019_Fusion_MASSFIITB_307198_S3.raw	F3		4.71		FALSE				0	2.093e-07	18233376	65.48	Sequest HT (A2)			Sequest HT (A2	uest HT	est HT	est HT	0.07
		FALSE	High	Sequest HT (A2)	Selected	[K].SLNNQFASFIDKVR.[F]		1	1	P04264	P04264	1	3	0.6517	0	1	1	546.958	1638.86	1638.86	0.13	7e-05	HCD (High Energy Collision Dissociation)	MS2	31.9177	30	55.8681	36351	01082019_Fusion_MASSFIITB_307198_S6.raw	F6		4.02		FALSE				0	9.231e-07	59590720	56.06	Sequest HT (A2)			Sequest HT (A2	uest HT	est HT	est HT	0.13
		FALSE	High	Sequest HT (A2)	Unambiguous	[K].SLNNQFASFIDKVR.[F]		1	1	P04264	P04264	1	3	0.7251	0	1	1	546.958	1638.86	1638.86	0.33	0.00018	HCD (High Energy Collision Dissociation)	MS2	2.92297	1.222	56.3136	39003	01082019_Fusion_MASSFIITB_307198_S4.raw	F4		3.71		FALSE				0	1.163e-06	1108032256	56.06	Sequest HT (A2)			Sequest HT (A2	uest HT	est HT	est HT	0.33
		FALSE	High	Sequest HT (A2)	Unambiguous	[K].SLNNQFASFIDKVR.[F]		1	1	P04264	P04264	1	3	0.7163	0	1	1	546.958	1638.86	1638.86	-0.3	-0.00016	HCD (High Energy Collision Dissociation)	MS2	10.3607	6.989	56.267	38935	01082019_Fusion_MASSFIITB_307198_S2.raw	F2		3.56		FALSE				0	1.485e-06	835750080	55.91	Sequest HT (A2)			Sequest HT (A2	uest HT	est HT	est HT	-0.3
		FALSE	High	Sequest HT (A2)	Unambiguous	[K].SLNNQFASFIDKVR.[F]		1	1	P04264	P04264	1	3	0.7578	0	1	1	546.958	1638.86	1638.86	-0.34	-0.00018	HCD (High Energy Collision Dissociation)	MS2	19.9115	13.88	56.3337	38687	01082019_Fusion_MASSFIITB_307198_S5.raw	F5		3.51		FALSE				0	1.629e-06	332071488	55.91	Sequest HT (A2)			Sequest HT (A2	uest HT	est HT	est HT	-0.34
		FALSE	High	Sequest HT (A2)	Unambiguous	[K].SLNNQFASFIDKVR.[F]		1	1	P04264	P04264	1	3	0.7133	0	1	1	546.958	1638.86	1638.86	-0.15	-8e-05	HCD (High Energy Collision Dissociation)	MS2	0	25.752	66.0153	48029	01082019_Fusion_MASSFIITB_307198_S3.raw	F3		4.22		FALSE				0	1.631e-06	48054868	65.85	Sequest HT (A2)			Sequest HT (A2	uest HT	est HT	est HT	-0.15
		FALSE	High	Sequest HT (A2)	Unambiguous	[K].SLNNQFASFIDKVR.[F]		1	1	P04264	P04264	1	2	0.5714	0	1	1	819.933	1638.86	1638.86	-0.07	-6e-05	HCD (High Energy Collision Dissociation)	MS2	45.7418	8.15	55.9133	38653	01082019_Fusion_MASSFIITB_307198_S4.raw	F4		3.15		FALSE				0	1.985e-06	189119664	56.06	Sequest HT (A2)			Sequest HT (A2	uest HT	est HT	est HT	-0.07
		FALSE	High	Sequest HT (A2)	Selected	[K].SLNNQFASFIDKVR.[F]		1	1	P04264	P04264	1	3	0.7179	0	1	1	546.958	1638.86	1638.86	0.09	5e-05	HCD (High Energy Collision Dissociation)	MS2	14.03	30	55.5995	38449	01082019_Fusion_MASSFIITB_307198_S1.raw	F1		3.58		FALSE				0	2.719e-06	140615840	55.89	Sequest HT (A2)			Sequest HT (A2	uest HT	est HT	est HT	0.09
		FALSE	High	Mascot (A5)	Unambiguous	[K].SLNNQFASFIDKVR.[F]		1	1	P04264	P04264	1	3	0.9153	0	1	1	546.958	1638.86	1638.86	-0.18	-0.0001	HCD (High Energy Collision Dissociation)	MS2	0	30	55.5731	38315	01082019_Fusion_MASSFIITB_307198_S2.raw	F2			59	FALSE	53	35	2.86717e-05	0	3.327e-06	835750080	55.91	Mascot (A5)			Mascot (A5)	cot (A5)	ot (A5)	ot (A5)	-0.18
		FALSE	High	Mascot (A5)	Unambiguous	[K].SLNNQFASFIDKVR.[F]		1	1	P04264	P04264	1	3	1	0	1	1	546.958	1638.86	1638.86	-0.3	-0.00016	HCD (High Energy Collision Dissociation)	MS2	10.3607	6.989	56.267	38935	01082019_Fusion_MASSFIITB_307198_S2.raw	F2			63	FALSE	53	35	9.94119e-06	0	5.186e-06	835750080	55.91	Mascot (A5)			Mascot (A5)	cot (A5)	ot (A5)	ot (A5)	-0.3
		FALSE	High	Mascot (A5)	Unambiguous	[K].SLNNQFASFIDKVR.[F]		1	1	P04264	P04264	1	3	0.9483	0	1	1	546.958	1638.86	1638.86	-0.34	-0.00018	HCD (High Energy Collision Dissociation)	MS2	19.9115	13.88	56.3337	38687	01082019_Fusion_MASSFIITB_307198_S5.raw	F5			58	FALSE	53	35	3.56811e-05	0	9.717e-06	332071488	55.91	Mascot (A5)			Mascot (A5)	cot (A5)	ot (A5)	ot (A5)	-0.34
		FALSE	High	Mascot (A5)	Unambiguous	[K].SLNNQFASFIDKVR.[F]		1	1	P04264	P04264	1	3	0.8793	0	1	1	546.958	1638.86	1638.86	-0.15	-8e-05	HCD (High Energy Collision Dissociation)	MS2	0	25.752	66.0153	48029	01082019_Fusion_MASSFIITB_307198_S3.raw	F3			58	FALSE	53	35	3.31477e-05	0	9.812e-06	48054868	65.85	Mascot (A5)			Mascot (A5)	cot (A5)	ot (A5)	ot (A5)	-0.15
		FALSE	High	Sequest HT (A2)	Unambiguous	[K].SLNNQFASFIDKVR.[F]		1	1	P04264	P04264	1	2	0.7365	0	1	1	819.933	1638.86	1638.86	-0.84	-0.00069	HCD (High Energy Collision Dissociation)	MS2	20.2306	10.605	55.982	38380	01082019_Fusion_MASSFIITB_307198_S5.raw	F5		3.53		FALSE				0	1.711e-05	56866952	55.91	Sequest HT (A2)			Sequest HT (A2	uest HT	est HT	est HT	-0.84
		FALSE	High	Sequest HT (A2)	Selected	[K].SLNNQFASFIDKVR.[F]		1	1	P04264	P04264	1	3	0.6637	0	1	1	546.957	1638.86	1638.86	-1.93	-0.00106	HCD (High Energy Collision Dissociation)	MS2	30.3115	23.5	49.1236	32700	01082019_Fusion_MASSFIITB_307198_S4.raw	F4		3.42		FALSE				0	1.803e-05	6854872	49.15	Sequest HT (A2)			Sequest HT (A2	uest HT	est HT	est HT	-1.93
		FALSE	High	Mascot (A5)	Unambiguous	[K].SLNNQFASFIDKVR.[F]		1	1	P04264	P04264	1	2	1	0	1	1	819.933	1638.86	1638.86	-0.84	-0.00069	HCD (High Energy Collision Dissociation)	MS2	20.2306	10.605	55.982	38380	01082019_Fusion_MASSFIITB_307198_S5.raw	F5			83	FALSE	53	35	1.11522e-07	0	2.176e-05	56866952	55.91	Mascot (A5)			Mascot (A5)	cot (A5)	ot (A5)	ot (A5)	-0.84
		FALSE	High	Mascot (A5)	Unambiguous	[K].SLNNQFASFIDKVR.[F]		1	1	P04264	P04264	1	2	0.975	0	1	1	819.933	1638.86	1638.86	-0.07	-6e-05	HCD (High Energy Collision Dissociation)	MS2	45.7418	8.15	55.9133	38653	01082019_Fusion_MASSFIITB_307198_S4.raw	F4			80	FALSE	53	35	2.27748e-07	0	3.51e-05	189119664	56.06	Mascot (A5)			Mascot (A5)	cot (A5)	ot (A5)	ot (A5)	-0.07
		FALSE	High	Sequest HT (A2)	Selected	[K].SLNNQFASFIDKVR.[F]		1	1	P04264	P04264	1	2	0.487	0	1	1	819.934	1638.86	1638.86	0.38	0.00032	HCD (High Energy Collision Dissociation)	MS2	51.1139	23.5	55.7634	38484	01082019_Fusion_MASSFIITB_307198_S2.raw	F2		2.69		FALSE				0	4.58e-05	137669328	55.91	Sequest HT (A2)			Sequest HT (A2	uest HT	est HT	est HT	0.38
		FALSE	High	Sequest HT (A2)	Selected	[K].SLNNQFASFIDKVR.[F]		1	1	P04264	P04264	1	3	0.6712	0	1	1	546.958	1638.86	1638.86	-0.18	-0.0001	HCD (High Energy Collision Dissociation)	MS2	17.5599	17.816	56.2814	39070	01082019_Fusion_MASSFIITB_307198_S1.raw	F1		2.92		FALSE				0	5.557e-05	140615840	55.89	Sequest HT (A2)			Sequest HT (A2	uest HT	est HT	est HT	-0.18
		FALSE	High	Mascot (A5)	Unambiguous	[K].SLNNQFASFIDKVR.[F]		1	1	P04264	P04264	1	3	0.9259	0	1	1	546.958	1638.86	1638.86	0.33	0.00018	HCD (High Energy Collision Dissociation)	MS2	2.92297	1.222	56.3136	39003	01082019_Fusion_MASSFIITB_307198_S4.raw	F4			54	FALSE	53	35	9.47226e-05	0	5.596e-05	1108032256	56.06	Mascot (A5)			Mascot (A5)	cot (A5)	ot (A5)	ot (A5)	0.33
		FALSE	High	Mascot (A5)	Unambiguous	[K].SLNNQFASFIDKVR.[F]		1	1	P04264	P04264	1	2	1	0	1	1	819.933	1638.86	1638.86	-0.83	-0.00068	HCD (High Energy Collision Dissociation)	MS2	28.7768	16.735	55.8778	39039	01082019_Fusion_MASSFIITB_307198_S3.raw	F3			65	FALSE	53	35	6.41533e-06	0	0.00018	46439968	55.99	Mascot (A5)			Mascot (A5)	cot (A5)	ot (A5)	ot (A5)	-0.83
		FALSE	High	Sequest HT (A2)	Unambiguous	[K].SLNNQFASFIDKVR.[F]		1	1	P04264	P04264	1	2	0.7302	0	1	1	819.933	1638.86	1638.86	-0.83	-0.00068	HCD (High Energy Collision Dissociation)	MS2	28.7768	16.735	55.8778	39039	01082019_Fusion_MASSFIITB_307198_S3.raw	F3		3.15		FALSE				0	0.0005628	46439968	55.99	Sequest HT (A2)			Sequest HT (A2	uest HT	est HT	est HT	-0.83
	FALSE	High	[R].SLVNLGGSK.[S]			FALSE	1	1	7	P04264	P04264 [66-74]	0	874.499	0	67.6	82.1	82.5	106.7	98.9	94.1	152.7	134.7	80.7		Peak Found	High	High	High	High	Peak Found	Peak Found	High	Peak Found	High	High	0	0.003421	0.01434	0.06404	2.31	67		R.SLVNLGGSK.S	[66-74]					152.7
		Checked	Confidence	Identifying Node	PSM Ambiguity	Annotated Sequence	Modifications	# Protein Groups	# Proteins	Master Protein Accessions	Protein Accessions	# Missed Cleavages	Charge	DeltaScore	DeltaCn	Rank	Search Engine Rank	m/z [Da]	MH+ [Da]	Theo. MH+ [Da]	DeltaM [ppm]	Deltam/z [Da]	Activation Type	MS Order	Isolation Interference [%]	Ion Inject Time [ms]	RT [min]	First Scan	Spectrum File	File ID	Quan Info	XCorr	Ions Score	Contaminant	Identity Strict	Identity Relaxed	Expectation Value	Percolator q-Value	Percolator PEP	Precursor Abundance	Apex RT [min]	Identifying Node			Identifying No	ntifying	tifying	tifying	DeltaM [ppm]
		FALSE	High	Sequest HT (A2)	Selected	[R].SLVNLGGSK.[S]		1	1	P04264	P04264	0	2	0.5652	0	1	1	437.753	874.499	874.499	-0.33	-0.00015	HCD (High Energy Collision Dissociation)	MS2	26.1557	30	33.7742	19185	01082019_Fusion_MASSFIITB_307198_S5.raw	F5		2.3		FALSE				0	0.008328	3570990336	33.27	Sequest HT (A2)			Sequest HT (A2	uest HT	est HT	est HT	-0.33
		FALSE	High	Mascot (A5)	Unambiguous	[R].SLVNLGGSK.[S]		1	1	P04264	P04264	0	2	0.8507	0	1	1	437.753	874.498	874.499	-0.9	-0.00039	HCD (High Energy Collision Dissociation)	MS2	14.3649	30	33.069	17830	01082019_Fusion_MASSFIITB_307198_S8.raw	F8			67	FALSE	54	36	6.36568e-06	0	0.01158	1061827520	33.29	Mascot (A5)			Mascot (A5)	cot (A5)	ot (A5)	ot (A5)	-0.9
		FALSE	High	Mascot (A5)	Unambiguous	[R].SLVNLGGSK.[S]		1	1	P04264	P04264	0	2	0.8507	0	1	1	437.753	874.498	874.499	-1.56	-0.00068	HCD (High Energy Collision Dissociation)	MS2	15.1296	16.817	33.0526	18897	01082019_Fusion_MASSFIITB_307198_S4.raw	F4			67	FALSE	55	37	6.35491e-06	0	0.01434	6346938880	33.24	Mascot (A5)			Mascot (A5)	cot (A5)	ot (A5)	ot (A5)	-1.56
		FALSE	High	Sequest HT (A2)	Unambiguous	[R].SLVNLGGSK.[S]		1	1	P04264	P04264	0	2	0.5746	0	1	1	437.753	874.498	874.499	-0.9	-0.00039	HCD (High Energy Collision Dissociation)	MS2	14.3649	30	33.069	17830	01082019_Fusion_MASSFIITB_307198_S8.raw	F8		2.28		FALSE				0.0002645	0.017	1061827520	33.29	Sequest HT (A2)			Sequest HT (A2	uest HT	est HT	est HT	-0.9
		FALSE	High	Mascot (A5)	Selected	[R].SLVNLGGSK.[S]		1	1	P04264	P04264	0	2	0.8209	0	1	1	437.753	874.498	874.499	-1.1	-0.00048	HCD (High Energy Collision Dissociation)	MS2	4.72128	11.274	33.0763	19118	01082019_Fusion_MASSFIITB_307198_S3.raw	F3			67	FALSE	54	36	5.87279e-06	0	0.01957	3965953280	33.25	Mascot (A5)			Mascot (A5)	cot (A5)	ot (A5)	ot (A5)	-1.1
		FALSE	High	Mascot (A5)	Selected	[R].SLVNLGGSK.[S]		1	1	P04264	P04264	0	2	0.791	0	1	1	437.753	874.499	874.499	-0.38	-0.00017	HCD (High Energy Collision Dissociation)	MS2	6.25373	8.776	33.0269	18447	01082019_Fusion_MASSFIITB_307198_S2.raw	F2			67	FALSE	54	36	5.79221e-06	0.0004792	0.03262	3521312256	33.2	Mascot (A5)			Mascot (A5)	cot (A5)	ot (A5)	ot (A5)	-0.38
		FALSE	High	Sequest HT (A2)	Unambiguous	[R].SLVNLGGSK.[S]		1	1	P04264	P04264	0	2	0.4805	0	1	1	437.753	874.498	874.499	-1.56	-0.00068	HCD (High Energy Collision Dissociation)	MS2	15.1296	16.817	33.0526	18897	01082019_Fusion_MASSFIITB_307198_S4.raw	F4		2.31		FALSE				0.003421	0.06404	6346938880	33.24	Sequest HT (A2)			Sequest HT (A2	uest HT	est HT	est HT	-1.56
	FALSE	High	[R].SLVNLGGSKSISISVAR.[G]			FALSE	1	1	6	P04264	P04264 [66-82]	1	1687.97	0	44.3	34.8	8.2	625.4	162.3	24.9					Peak Found	High	Peak Found	High	High	Peak Found	Not Found	Not Found	Not Found	High	High	0	0	0.0008772	2.503e-05	3.92	58		R.SLVNLGGSKSISISVAR.G	[66-82]
		Checked	Confidence	Identifying Node	PSM Ambiguity	Annotated Sequence	Modifications	# Protein Groups	# Proteins	Master Protein Accessions	Protein Accessions	# Missed Cleavages	Charge	DeltaScore	DeltaCn	Rank	Search Engine Rank	m/z [Da]	MH+ [Da]	Theo. MH+ [Da]	DeltaM [ppm]	Deltam/z [Da]	Activation Type	MS Order	Isolation Interference [%]	Ion Inject Time [ms]	RT [min]	First Scan	Spectrum File	File ID	Quan Info	XCorr	Ions Score	Contaminant	Identity Strict	Identity Relaxed	Expectation Value	Percolator q-Value	Percolator PEP	Precursor Abundance	Apex RT [min]	Identifying Node			Identifying No	ntifying	tifying	tifying	DeltaM [ppm]
		FALSE	High	Sequest HT (A2)	Unambiguous	[R].SLVNLGGSKSISISVAR.[G]		1	1	P04264	P04264	1	3	0.7628	0	1	1	563.328	1687.97	1687.97	-0.25	-0.00014	HCD (High Energy Collision Dissociation)	MS2	11.8951	8.669	46.919	30781	01082019_Fusion_MASSFIITB_307198_S4.raw	F4		3.92		FALSE				0	2.503e-05	265562896	47.02	Sequest HT (A2)			Sequest HT (A2	uest HT	est HT	est HT	-0.25
		FALSE	High	Sequest HT (A2)	Selected	[R].SLVNLGGSKSISISVAR.[G]		1	1	P04264	P04264	1	3	0.7208	0	1	1	563.329	1687.97	1687.97	1.17	0.00066	HCD (High Energy Collision Dissociation)	MS2	61.7209	10.932	47.0286	30515	01082019_Fusion_MASSFIITB_307198_S5.raw	F5		3.08		FALSE				0	0.000576	40132792	47.06	Sequest HT (A2)			Sequest HT (A2	uest HT	est HT	est HT	1.17
		FALSE	High	Mascot (A5)	Unambiguous	[R].SLVNLGGSKSISISVAR.[G]		1	1	P04264	P04264	1	2	1	0	1	1	844.489	1687.97	1687.97	0.44	0.00037	HCD (High Energy Collision Dissociation)	MS2	29.6112	23.5	46.9475	30806	01082019_Fusion_MASSFIITB_307198_S4.raw	F4			70	FALSE	48	30	7.15836e-07	0	0.0006495	53261684	47.01	Mascot (A5)			Mascot (A5)	cot (A5)	ot (A5)	ot (A5)	0.44
		FALSE	High	Mascot (A5)	Unambiguous	[R].SLVNLGGSKSISISVAR.[G]		1	1	P04264	P04264	1	3	0.9828	0	1	1	563.328	1687.97	1687.97	-0.25	-0.00014	HCD (High Energy Collision Dissociation)	MS2	11.8951	8.669	46.919	30781	01082019_Fusion_MASSFIITB_307198_S4.raw	F4			58	FALSE	48	31	1.13206e-05	0	0.0008772	265562896	47.02	Mascot (A5)			Mascot (A5)	cot (A5)	ot (A5)	ot (A5)	-0.25
		FALSE	High	Sequest HT (A2)	Unambiguous	[R].SLVNLGGSKSISISVAR.[G]		1	1	P04264	P04264	1	2	0.8019	0	1	1	844.489	1687.97	1687.97	0.44	0.00037	HCD (High Energy Collision Dissociation)	MS2	29.6112	23.5	46.9475	30806	01082019_Fusion_MASSFIITB_307198_S4.raw	F4		3.23		FALSE				0	0.001	53261684	47.01	Sequest HT (A2)			Sequest HT (A2	uest HT	est HT	est HT	0.44
		FALSE	High	Sequest HT (A2)	Selected	[R].SLVNLGGSKSISISVAR.[G]		1	1	P04264	P04264	1	3	0.7082	0	1	1	563.328	1687.97	1687.97	0.05	3e-05	HCD (High Energy Collision Dissociation)	MS2	32.4434	23.5	47.1149	30694	01082019_Fusion_MASSFIITB_307198_S2.raw	F2		3.05		FALSE				0	0.004352	11735592	47.01	Sequest HT (A2)			Sequest HT (A2	uest HT	est HT	est HT	0.05
	FALSE	High	[R].SLDLDSIIAEVK.[A]			FALSE	1	1	38	P04264	P04264 [344-355]	0	1302.72	0	101.4	118.5	129.1	250	115	142.2	17.1	26.6			High	High	High	High	High	High	High	High	Not Found	High	High	0	0	0.007861	5.2e-05	3.44	58		R.SLDLDSIIAEVK.A	[344-355]					17.1
		Checked	Confidence	Identifying Node	PSM Ambiguity	Annotated Sequence	Modifications	# Protein Groups	# Proteins	Master Protein Accessions	Protein Accessions	# Missed Cleavages	Charge	DeltaScore	DeltaCn	Rank	Search Engine Rank	m/z [Da]	MH+ [Da]	Theo. MH+ [Da]	DeltaM [ppm]	Deltam/z [Da]	Activation Type	MS Order	Isolation Interference [%]	Ion Inject Time [ms]	RT [min]	First Scan	Spectrum File	File ID	Quan Info	XCorr	Ions Score	Contaminant	Identity Strict	Identity Relaxed	Expectation Value	Percolator q-Value	Percolator PEP	Precursor Abundance	Apex RT [min]	Identifying Node			Identifying No	ntifying	tifying	tifying	DeltaM [ppm]
		FALSE	High	Sequest HT (A2)	Unambiguous	[R].SLDLDSIIAEVK.[A]		1	1	P04264	P04264	0	2	0.4321	0	1	1	651.862	1302.72	1302.72	0.68	0.00045	HCD (High Energy Collision Dissociation)	MS2	31.2549	30	59.188	41961	01082019_Fusion_MASSFIITB_307198_S3.raw	F3		2.43		FALSE				0	2.379e-06	20669340	59.28	Sequest HT (A2)			Sequest HT (A2	uest HT	est HT	est HT	0.68
		FALSE	High	Mascot (A5)	Unambiguous	[R].SLDLDSIIAEVK.[A]		1	1	P04264	P04264	0	2	0.8763	0	1	1	651.861	1302.72	1302.72	0.4	0.00026	HCD (High Energy Collision Dissociation)	MS2	5.54659	22.115	68.3813	49940	01082019_Fusion_MASSFIITB_307198_S1.raw	F1			97	FALSE	53	35	4.30668e-09	0	1.618e-05	388137856	68.44	Mascot (A5)			Mascot (A5)	cot (A5)	ot (A5)	ot (A5)	0.4
		FALSE	High	Sequest HT (A2)	Unambiguous	[R].SLDLDSIIAEVK.[A]		1	1	P04264	P04264	0	2	0.5292	0	1	1	651.861	1302.72	1302.72	0.07	4e-05	HCD (High Energy Collision Dissociation)	MS2	3.47818	23.5	69.0258	50416	01082019_Fusion_MASSFIITB_307198_S4.raw	F4		3.08		FALSE				0	1.724e-05	63107612	69.01	Sequest HT (A2)			Sequest HT (A2	uest HT	est HT	est HT	0.07
		FALSE	High	Mascot (A5)	Unambiguous	[R].SLDLDSIIAEVK.[A]		1	1	P04264	P04264	0	2	0.8537	0	1	1	651.862	1302.72	1302.72	0.68	0.00045	HCD (High Energy Collision Dissociation)	MS2	31.2549	30	59.188	41961	01082019_Fusion_MASSFIITB_307198_S3.raw	F3			82	FALSE	53	35	1.49673e-07	0	2.196e-05	20669340	59.28	Mascot (A5)			Mascot (A5)	cot (A5)	ot (A5)	ot (A5)	0.68
		FALSE	High	Mascot (A5)	Unambiguous	[R].SLDLDSIIAEVK.[A]		1	1	P04264	P04264	0	2	0.8243	0	1	1	651.862	1302.72	1302.72	1.22	0.00079	HCD (High Energy Collision Dissociation)	MS2	19.7655	30	69.6647	51433	01082019_Fusion_MASSFIITB_307198_S3.raw	F3			74	FALSE	53	35	9.82071e-07	0	2.718e-05	708742592	69.01	Mascot (A5)			Mascot (A5)	cot (A5)	ot (A5)	ot (A5)	1.22
		FALSE	High	Mascot (A5)	Unambiguous	[R].SLDLDSIIAEVK.[A]		1	1	P04264	P04264	0	2	0.8763	0	1	1	651.861	1302.71	1302.72	-0.1	-7e-05	HCD (High Energy Collision Dissociation)	MS2	9.45554	12.588	68.3632	49568	01082019_Fusion_MASSFIITB_307198_S5.raw	F5			97	FALSE	53	35	4.29745e-09	0	3.249e-05	980685120	68.43	Mascot (A5)			Mascot (A5)	cot (A5)	ot (A5)	ot (A5)	-0.1
		FALSE	High	Sequest HT (A2)	Unambiguous	[R].SLDLDSIIAEVK.[A]		1	1	P04264	P04264	0	2	0.4983	0	1	1	651.86	1302.71	1302.72	-1.33	-0.00087	HCD (High Energy Collision Dissociation)	MS2	50.9417	30	68.295	50164	01082019_Fusion_MASSFIITB_307198_S3.raw	F3		2.93		FALSE				0	4.469e-05	787304320	68.4	Sequest HT (A2)			Sequest HT (A2	uest HT	est HT	est HT	-1.33
		FALSE	High	Sequest HT (A2)	Unambiguous	[R].SLDLDSIIAEVK.[A]		1	1	P04264	P04264	0	2	0.4498	0	1	1	651.861	1302.71	1302.72	-0.19	-0.00013	HCD (High Energy Collision Dissociation)	MS2	0	1.61	68.9704	50791	01082019_Fusion_MASSFIITB_307198_S3.raw	F3		3.09		FALSE				0	4.845e-05	708742592	69.01	Sequest HT (A2)			Sequest HT (A2	uest HT	est HT	est HT	-0.19
		FALSE	High	Sequest HT (A2)	Unambiguous	[R].SLDLDSIIAEVK.[A]		1	1	P04264	P04264	0	2	0.4738	0	1	1	651.861	1302.72	1302.72	0.04	2e-05	HCD (High Energy Collision Dissociation)	MS2	8.75602	6.511	68.3845	50055	01082019_Fusion_MASSFIITB_307198_S2.raw	F2		3.44		FALSE				0	5.2e-05	1215979904	68.45	Sequest HT (A2)			Sequest HT (A2	uest HT	est HT	est HT	0.04
		FALSE	High	Sequest HT (A2)	Unambiguous	[R].SLDLDSIIAEVK.[A]		1	1	P04264	P04264	0	2	0.5	0	1	1	651.862	1302.72	1302.72	1.22	0.00079	HCD (High Energy Collision Dissociation)	MS2	19.7655	30	69.6647	51433	01082019_Fusion_MASSFIITB_307198_S3.raw	F3		2.72		FALSE				0	5.2e-05	708742592	69.01	Sequest HT (A2)			Sequest HT (A2	uest HT	est HT	est HT	1.22
		FALSE	High	Sequest HT (A2)	Unambiguous	[R].SLDLDSIIAEVK.[A]		1	1	P04264	P04264	0	2	0.5052	0	1	1	651.861	1302.72	1302.72	0.21	0.00014	HCD (High Energy Collision Dissociation)	MS2	18.1207	30	68.3758	48001	01082019_Fusion_MASSFIITB_307198_S8.raw	F8		2.91		FALSE				0	5.356e-05	47000932	68.43	Sequest HT (A2)			Sequest HT (A2	uest HT	est HT	est HT	0.21
		FALSE	High	Mascot (A5)	Unambiguous	[R].SLDLDSIIAEVK.[A]		1	1	P04264	P04264	0	2	0.8727	0	1	1	651.861	1302.72	1302.72	0.04	2e-05	HCD (High Energy Collision Dissociation)	MS2	8.75602	6.511	68.3845	50055	01082019_Fusion_MASSFIITB_307198_S2.raw	F2			110	FALSE	53	35	2.32e-10	0	6.234e-05	1215979904	68.45	Mascot (A5)			Mascot (A5)	cot (A5)	ot (A5)	ot (A5)	0.04
		FALSE	High	Mascot (A5)	Unambiguous	[R].SLDLDSIIAEVK.[A]		1	1	P04264	P04264	0	2	0.8519	0	1	1	651.861	1302.72	1302.72	0.07	4e-05	HCD (High Energy Collision Dissociation)	MS2	3.47818	23.5	69.0258	50416	01082019_Fusion_MASSFIITB_307198_S4.raw	F4			81	FALSE	53	35	1.89447e-07	0	6.569e-05	63107612	69.01	Mascot (A5)			Mascot (A5)	cot (A5)	ot (A5)	ot (A5)	0.07
		FALSE	High	Sequest HT (A2)	Unambiguous	[R].SLDLDSIIAEVK.[A]		1	1	P04264	P04264	0	2	0.5029	0	1	1	651.861	1302.71	1302.72	-0.1	-7e-05	HCD (High Energy Collision Dissociation)	MS2	9.45554	12.588	68.3632	49568	01082019_Fusion_MASSFIITB_307198_S5.raw	F5		3.4		FALSE				0	6.88e-05	980685120	68.43	Sequest HT (A2)			Sequest HT (A2	uest HT	est HT	est HT	-0.1
		FALSE	High	Sequest HT (A2)	Unambiguous	[R].SLDLDSIIAEVK.[A]		1	1	P04264	P04264	0	2	0.5058	0	1	1	651.861	1302.72	1302.72	0.4	0.00026	HCD (High Energy Collision Dissociation)	MS2	5.54659	22.115	68.3813	49940	01082019_Fusion_MASSFIITB_307198_S1.raw	F1		3.42		FALSE				0	7.548e-05	388137856	68.44	Sequest HT (A2)			Sequest HT (A2	uest HT	est HT	est HT	0.4
		FALSE	High	Mascot (A5)	Selected	[R].SLDLDSIIAEVK.[A]		1	1	P04264	P04264	0	2	0.8767	0	1	1	651.861	1302.72	1302.72	0.07	5e-05	HCD (High Energy Collision Dissociation)	MS2	28.2156	30	68.3715	44099	01082019_Fusion_MASSFIITB_307198_S7.raw	F7			73	FALSE	53	35	1.32889e-06	0	0.0001145	11086870	68.42	Mascot (A5)			Mascot (A5)	cot (A5)	ot (A5)	ot (A5)	0.07
		FALSE	High	Mascot (A5)	Unambiguous	[R].SLDLDSIIAEVK.[A]		1	1	P04264	P04264	0	2	0.8313	0	1	1	651.86	1302.71	1302.72	-1.33	-0.00087	HCD (High Energy Collision Dissociation)	MS2	50.9417	30	68.295	50164	01082019_Fusion_MASSFIITB_307198_S3.raw	F3			83	FALSE	54	36	1.45414e-07	0	0.0001175	787304320	68.4	Mascot (A5)			Mascot (A5)	cot (A5)	ot (A5)	ot (A5)	-1.33
		FALSE	High	Mascot (A5)	Unambiguous	[R].SLDLDSIIAEVK.[A]		1	1	P04264	P04264	0	2	0.8481	0	1	1	651.861	1302.72	1302.72	0.38	0.00025	HCD (High Energy Collision Dissociation)	MS2	0.801536	4.536	68.4005	47580	01082019_Fusion_MASSFIITB_307198_S6.raw	F6			79	FALSE	53	35	3.19259e-07	0	0.000124	415484352	68.44	Mascot (A5)			Mascot (A5)	cot (A5)	ot (A5)	ot (A5)	0.38
		FALSE	High	Sequest HT (A2)	Unambiguous	[R].SLDLDSIIAEVK.[A]		1	1	P04264	P04264	0	2	0.461	0	1	1	651.861	1302.72	1302.72	0.38	0.00025	HCD (High Energy Collision Dissociation)	MS2	0.801536	4.536	68.4005	47580	01082019_Fusion_MASSFIITB_307198_S6.raw	F6		3.08		FALSE				0	0.0001334	415484352	68.44	Sequest HT (A2)			Sequest HT (A2	uest HT	est HT	est HT	0.38
		FALSE	High	Mascot (A5)	Unambiguous	[R].SLDLDSIIAEVK.[A]		1	1	P04264	P04264	0	2	0.8375	0	1	1	651.861	1302.72	1302.72	-0.05	-3e-05	HCD (High Energy Collision Dissociation)	MS2	13.9637	9.183	68.3194	49753	01082019_Fusion_MASSFIITB_307198_S4.raw	F4			80	FALSE	53	35	2.20956e-07	0	0.0001888	3514947840	68.43	Mascot (A5)			Mascot (A5)	cot (A5)	ot (A5)	ot (A5)	-0.05
		FALSE	High	Sequest HT (A2)	Unambiguous	[R].SLDLDSIIAEVK.[A]		1	1	P04264	P04264	0	2	0.5	0	1	1	651.861	1302.72	1302.72	-0.05	-3e-05	HCD (High Energy Collision Dissociation)	MS2	13.9637	9.183	68.3194	49753	01082019_Fusion_MASSFIITB_307198_S4.raw	F4		3.34		FALSE				0	0.0001971	3514947840	68.43	Sequest HT (A2)			Sequest HT (A2	uest HT	est HT	est HT	-0.05
		FALSE	High	Mascot (A5)	Unambiguous	[R].SLDLDSIIAEVK.[A]		1	1	P04264	P04264	0	2	0.8158	0	1	1	651.862	1302.72	1302.72	0.57	0.00037	HCD (High Energy Collision Dissociation)	MS2	15.4225	30	70.0841	49164	01082019_Fusion_MASSFIITB_307198_S6.raw	F6			76	FALSE	53	35	6.11143e-07	0	0.0001977	4286656	70.1	Mascot (A5)			Mascot (A5)	cot (A5)	ot (A5)	ot (A5)	0.57
		FALSE	High	Sequest HT (A2)	Unambiguous	[R].SLDLDSIIAEVK.[A]		1	1	P04264	P04264	0	3	0.5647	0	1	1	434.91	1302.71	1302.72	-0.65	-0.00028	HCD (High Energy Collision Dissociation)	MS2	0	30	68.4368	50105	01082019_Fusion_MASSFIITB_307198_S2.raw	F2		2.78		FALSE				0	0.0002163	6518987	68.44	Sequest HT (A2)			Sequest HT (A2	uest HT	est HT	est HT	-0.65
		FALSE	High	Mascot (A5)	Unambiguous	[R].SLDLDSIIAEVK.[A]		1	1	P04264	P04264	0	2	0.8228	0	1	1	651.861	1302.72	1302.72	0.21	0.00014	HCD (High Energy Collision Dissociation)	MS2	18.1207	30	68.3758	48001	01082019_Fusion_MASSFIITB_307198_S8.raw	F8			79	FALSE	53	35	3.00946e-07	0	0.0002289	47000932	68.43	Mascot (A5)			Mascot (A5)	cot (A5)	ot (A5)	ot (A5)	0.21
		FALSE	High	Sequest HT (A2)	Unambiguous	[R].SLDLDSIIAEVK.[A]		1	1	P04264	P04264	0	2	0.498	0	1	1	651.862	1302.72	1302.72	0.57	0.00037	HCD (High Energy Collision Dissociation)	MS2	15.4225	30	70.0841	49164	01082019_Fusion_MASSFIITB_307198_S6.raw	F6		2.51		FALSE				0	0.0002329	4286656	70.1	Sequest HT (A2)			Sequest HT (A2	uest HT	est HT	est HT	0.57
		FALSE	High	Sequest HT (A2)	Unambiguous	[R].SLDLDSIIAEVK.[A]		1	1	P04264	P04264	0	2	0.4444	0	1	1	651.861	1302.72	1302.72	0.42	0.00027	HCD (High Energy Collision Dissociation)	MS2	0	25.976	59.1954	41245	01082019_Fusion_MASSFIITB_307198_S5.raw	F5		2.61		FALSE				0	0.0004256	20503174	59.29	Sequest HT (A2)			Sequest HT (A2	uest HT	est HT	est HT	0.42
		FALSE	High	Sequest HT (A2)	Unambiguous	[R].SLDLDSIIAEVK.[A]		1	1	P04264	P04264	0	2	0.4602	0	1	1	651.861	1302.71	1302.72	-0.59	-0.00038	HCD (High Energy Collision Dissociation)	MS2	21.4976	30	70.5116	51809	01082019_Fusion_MASSFIITB_307198_S4.raw	F4		2.26		FALSE				0	0.0004304	23147906	70.08	Sequest HT (A2)			Sequest HT (A2	uest HT	est HT	est HT	-0.59
		FALSE	High	Mascot (A5)	Unambiguous	[R].SLDLDSIIAEVK.[A]		1	1	P04264	P04264	0	3	0.8947	0	1	1	434.91	1302.71	1302.72	-0.66	-0.00029	HCD (High Energy Collision Dissociation)	MS2	0	30	68.4036	49832	01082019_Fusion_MASSFIITB_307198_S4.raw	F4			57	FALSE	53	35	4.65294e-05	0	0.0004851	15763697	68.42	Mascot (A5)			Mascot (A5)	cot (A5)	ot (A5)	ot (A5)	-0.66
		FALSE	High	Mascot (A5)	Unambiguous	[R].SLDLDSIIAEVK.[A]		1	1	P04264	P04264	0	2	0.8	0	1	1	651.861	1302.71	1302.72	-0.19	-0.00013	HCD (High Energy Collision Dissociation)	MS2	0	1.61	68.9704	50791	01082019_Fusion_MASSFIITB_307198_S3.raw	F3			70	FALSE	53	35	2.22439e-06	0	0.0006085	708742592	69.01	Mascot (A5)			Mascot (A5)	cot (A5)	ot (A5)	ot (A5)	-0.19
		FALSE	High	Mascot (A5)	Unambiguous	[R].SLDLDSIIAEVK.[A]		1	1	P04264	P04264	0	3	0.9643	0	1	1	434.91	1302.71	1302.72	-0.65	-0.00028	HCD (High Energy Collision Dissociation)	MS2	0	30	68.4368	50105	01082019_Fusion_MASSFIITB_307198_S2.raw	F2			56	FALSE	53	35	5.44162e-05	0	0.000706	6518987	68.44	Mascot (A5)			Mascot (A5)	cot (A5)	ot (A5)	ot (A5)	-0.65
		FALSE	High	Sequest HT (A2)	Unambiguous	[R].SLDLDSIIAEVK.[A]		1	1	P04264	P04264	0	3	0.5258	0	1	1	434.91	1302.71	1302.72	-0.66	-0.00029	HCD (High Energy Collision Dissociation)	MS2	0	30	68.4036	49832	01082019_Fusion_MASSFIITB_307198_S4.raw	F4		3.1		FALSE				0	0.0008567	15763697	68.42	Sequest HT (A2)			Sequest HT (A2	uest HT	est HT	est HT	-0.66
		FALSE	High	Mascot (A5)	Unambiguous	[R].SLDLDSIIAEVK.[A]		1	1	P04264	P04264	0	2	0.75	0	1	1	651.861	1302.71	1302.72	-0.59	-0.00038	HCD (High Energy Collision Dissociation)	MS2	21.4976	30	70.5116	51809	01082019_Fusion_MASSFIITB_307198_S4.raw	F4			64	FALSE	53	35	9.3267e-06	0	0.00118	23147906	70.08	Mascot (A5)			Mascot (A5)	cot (A5)	ot (A5)	ot (A5)	-0.59
		FALSE	High	Mascot (A5)	Selected	[R].SLDLDSIIAEVK.[A]		1	1	P04264	P04264	0	2	0.873	0	1	1	651.861	1302.71	1302.72	-0.19	-0.00012	HCD (High Energy Collision Dissociation)	MS2	47.8029	15.702	59.0852	41440	01082019_Fusion_MASSFIITB_307198_S4.raw	F4			63	FALSE	53	35	1.20008e-05	0	0.001241	54116172	59.23	Mascot (A5)			Mascot (A5)	cot (A5)	ot (A5)	ot (A5)	-0.19
		FALSE	High	Mascot (A5)	Unambiguous	[R].SLDLDSIIAEVK.[A]		1	1	P04264	P04264	0	2	0.7917	0	1	1	651.861	1302.72	1302.72	0.42	0.00027	HCD (High Energy Collision Dissociation)	MS2	0	25.976	59.1954	41245	01082019_Fusion_MASSFIITB_307198_S5.raw	F5			72	FALSE	53	35	1.49673e-06	0	0.001841	20503174	59.29	Mascot (A5)			Mascot (A5)	cot (A5)	ot (A5)	ot (A5)	0.42
		FALSE	High	Mascot (A5)	Selected	[R].SLDLDSIIAEVK.[A]		1	1	P04264	P04264	0	2	0.7869	0	1	1	651.861	1302.71	1302.72	-1.03	-0.00067	HCD (High Energy Collision Dissociation)	MS2	71.8185	23.5	59.1822	41573	01082019_Fusion_MASSFIITB_307198_S2.raw	F2			61	FALSE	54	36	2.05403e-05	0	0.002986	13954506	59.29	Mascot (A5)			Mascot (A5)	cot (A5)	ot (A5)	ot (A5)	-1.03
		FALSE	High	Mascot (A5)	Selected	[R].SLDLDSIIAEVK.[A]		1	1	P04264	P04264	0	2	0.7414	0	1	1	651.86	1302.71	1302.72	-2.21	-0.00144	HCD (High Energy Collision Dissociation)	MS2	0	30	69.0688	50223	01082019_Fusion_MASSFIITB_307198_S5.raw	F5			58	FALSE	54	36	4.47122e-05	0	0.007861	12134995	68.95	Mascot (A5)			Mascot (A5)	cot (A5)	ot (A5)	ot (A5)	-2.21
		FALSE	High	Mascot (A5)	Selected	[R].SLDLDSIIAEVK.[A]		1	1	P04264	P04264	0	2	0.7193	0	1	1	651.861	1302.72	1302.72	0.25	0.00017	HCD (High Energy Collision Dissociation)	MS2	17.4401	30	59.183	41699	01082019_Fusion_MASSFIITB_307198_S1.raw	F1			57	FALSE	53	35	5.32707e-05	0	0.01466	7.6838e+06	59.29	Mascot (A5)			Mascot (A5)	cot (A5)	ot (A5)	ot (A5)	0.25
		FALSE	High	Mascot (A5)	Selected	[R].SLDLDSIIAEVK.[A]		1	1	P04264	P04264	0	2	0.7193	0	1	1	651.861	1302.71	1302.72	-0.28	-0.00018	HCD (High Energy Collision Dissociation)	MS2	4.94844	30	70.3673	52072	01082019_Fusion_MASSFIITB_307198_S3.raw	F3			57	FALSE	53	35	5.15479e-05	0.003871	0.07249	5.25491e+06	70.01	Mascot (A5)			Mascot (A5)	cot (A5)	ot (A5)	ot (A5)	-0.28
	FALSE	High	[R].SGGGFSSGSAGIINYQR.[R]			FALSE	1	1	15	P04264	P04264 [13-29]	0	1657.79	0	85	91.4	91.5	96	117.1	124.3	150.2	144.6			High	High	High	High	High	Peak Found	Peak Found	High	Not Found	High	High	0	0	0.001776	4.445e-08	4.03	53		R.SGGGFSSGSAGIINYQR.R	[13-29]					150.2
		Checked	Confidence	Identifying Node	PSM Ambiguity	Annotated Sequence	Modifications	# Protein Groups	# Proteins	Master Protein Accessions	Protein Accessions	# Missed Cleavages	Charge	DeltaScore	DeltaCn	Rank	Search Engine Rank	m/z [Da]	MH+ [Da]	Theo. MH+ [Da]	DeltaM [ppm]	Deltam/z [Da]	Activation Type	MS Order	Isolation Interference [%]	Ion Inject Time [ms]	RT [min]	First Scan	Spectrum File	File ID	Quan Info	XCorr	Ions Score	Contaminant	Identity Strict	Identity Relaxed	Expectation Value	Percolator q-Value	Percolator PEP	Precursor Abundance	Apex RT [min]	Identifying Node			Identifying No	ntifying	tifying	tifying	DeltaM [ppm]
		FALSE	High	Sequest HT (A2)	Unambiguous	[R].SGGGFSSGSAGIINYQR.[R]		1	1	P04264	P04264	0	2	0.8015	0	1	1	829.4	1657.79	1657.79	-0.24	-0.0002	HCD (High Energy Collision Dissociation)	MS2	0	24.777	43.5033	27778	01082019_Fusion_MASSFIITB_307198_S4.raw	F4		4.03		FALSE				0	4.445e-08	462356576	43.66	Sequest HT (A2)			Sequest HT (A2	uest HT	est HT	est HT	-0.24
		FALSE	High	Sequest HT (A2)	Unambiguous	[R].SGGGFSSGSAGIINYQR.[R]		1	1	P04264	P04264	0	2	0.7645	0	1	1	829.399	1657.79	1657.79	-1.43	-0.00119	HCD (High Energy Collision Dissociation)	MS2	0	30	43.5584	28070	01082019_Fusion_MASSFIITB_307198_S3.raw	F3		3.44		FALSE				0	3.181e-07	346507232	43.69	Sequest HT (A2)			Sequest HT (A2	uest HT	est HT	est HT	-1.43
		FALSE	High	Sequest HT (A2)	Unambiguous	[R].SGGGFSSGSAGIINYQR.[R]		1	1	P04264	P04264	0	2	0.7792	0	1	1	829.403	1657.8	1657.79	3.24	0.00269	HCD (High Energy Collision Dissociation)	MS2	47.3955	26.243	43.5932	27512	01082019_Fusion_MASSFIITB_307198_S2.raw	F2		3.17		FALSE				0	3.856e-07	317327488	43.77	Sequest HT (A2)			Sequest HT (A2	uest HT	est HT	est HT	3.24
		FALSE	High	Sequest HT (A2)	Unambiguous	[R].SGGGFSSGSAGIINYQR.[R]		1	1	P04264	P04264	0	2	0.7143	0	1	1	829.401	1657.79	1657.79	0.95	0.00079	HCD (High Energy Collision Dissociation)	MS2	61.8336	30	43.5527	26333	01082019_Fusion_MASSFIITB_307198_S8.raw	F8		2.59		FALSE				0	6.874e-07	92263512	43.69	Sequest HT (A2)			Sequest HT (A2	uest HT	est HT	est HT	0.95
		FALSE	High	Mascot (A5)	Unambiguous	[R].SGGGFSSGSAGIINYQR.[R]		1	1	P04264	P04264	0	2	1	0	1	1	829.399	1657.79	1657.79	-1.43	-0.00119	HCD (High Energy Collision Dissociation)	MS2	0	30	43.5584	28070	01082019_Fusion_MASSFIITB_307198_S3.raw	F3			95	FALSE	53	35	7.05419e-09	0	1.649e-06	346507232	43.69	Mascot (A5)			Mascot (A5)	cot (A5)	ot (A5)	ot (A5)	-1.43
		FALSE	High	Sequest HT (A2)	Unambiguous	[R].SGGGFSSGSAGIINYQR.[R]		1	1	P04264	P04264	0	2	0.7555	0	1	1	829.399	1657.79	1657.79	-1.15	-0.00095	HCD (High Energy Collision Dissociation)	MS2	0	30	43.5697	27569	01082019_Fusion_MASSFIITB_307198_S1.raw	F1		2.74		FALSE				0	2.808e-06	111381696	43.7	Sequest HT (A2)			Sequest HT (A2	uest HT	est HT	est HT	-1.15
		FALSE	High	Sequest HT (A2)	Unambiguous	[R].SGGGFSSGSAGIINYQR.[R]		1	1	P04264	P04264	0	2	0.7812	0	1	1	829.402	1657.8	1657.79	2.21	0.00183	HCD (High Energy Collision Dissociation)	MS2	0	30	45.424	29699	01082019_Fusion_MASSFIITB_307198_S3.raw	F3		2.24		FALSE				0	9.755e-06			Sequest HT (A2)			Sequest HT (A2	uest HT	est HT	est HT	2.21
		FALSE	High	Mascot (A5)	Unambiguous	[R].SGGGFSSGSAGIINYQR.[R]		1	1	P04264	P04264	0	2	0.9579	0	1	1	829.4	1657.79	1657.79	-0.24	-0.0002	HCD (High Energy Collision Dissociation)	MS2	0	24.777	43.5033	27778	01082019_Fusion_MASSFIITB_307198_S4.raw	F4			95	FALSE	53	35	6.95726e-09	0	1.011e-05	462356576	43.66	Mascot (A5)			Mascot (A5)	cot (A5)	ot (A5)	ot (A5)	-0.24
		FALSE	High	Mascot (A5)	Unambiguous	[R].SGGGFSSGSAGIINYQR.[R]		1	1	P04264	P04264	0	2	1	0	1	1	829.403	1657.8	1657.79	3.24	0.00269	HCD (High Energy Collision Dissociation)	MS2	47.3955	26.243	43.5932	27512	01082019_Fusion_MASSFIITB_307198_S2.raw	F2			67	FALSE	53	35	4.63898e-06	0	2.655e-05	317327488	43.77	Mascot (A5)			Mascot (A5)	cot (A5)	ot (A5)	ot (A5)	3.24
		FALSE	High	Mascot (A5)	Unambiguous	[R].SGGGFSSGSAGIINYQR.[R]		1	1	P04264	P04264	0	2	1	0	1	1	829.401	1657.79	1657.79	0.95	0.00079	HCD (High Energy Collision Dissociation)	MS2	61.8336	30	43.5527	26333	01082019_Fusion_MASSFIITB_307198_S8.raw	F8			67	FALSE	53	35	4.76936e-06	0	3.367e-05	92263512	43.69	Mascot (A5)			Mascot (A5)	cot (A5)	ot (A5)	ot (A5)	0.95
		FALSE	High	Mascot (A5)	Unambiguous	[R].SGGGFSSGSAGIINYQR.[R]		1	1	P04264	P04264	0	2	1	0	1	1	829.399	1657.79	1657.79	-1.15	-0.00095	HCD (High Energy Collision Dissociation)	MS2	0	30	43.5697	27569	01082019_Fusion_MASSFIITB_307198_S1.raw	F1			76	FALSE	53	35	6.03193e-07	0	7.575e-05	111381696	43.7	Mascot (A5)			Mascot (A5)	cot (A5)	ot (A5)	ot (A5)	-1.15
		FALSE	High	Mascot (A5)	Unambiguous	[R].SGGGFSSGSAGIINYQR.[R]		1	1	P04264	P04264	0	2	1	0	1	1	829.402	1657.8	1657.79	2.21	0.00183	HCD (High Energy Collision Dissociation)	MS2	0	30	45.424	29699	01082019_Fusion_MASSFIITB_307198_S3.raw	F3			69	FALSE	53	35	2.84714e-06	0	0.0003397	9795412	45.47	Mascot (A5)			Mascot (A5)	cot (A5)	ot (A5)	ot (A5)	2.21
		FALSE	High	Mascot (A5)	Unambiguous	[R].SGGGFSSGSAGIINYQR.[R]		1	1	P04264	P04264	0	2	1	0	1	1	829.407	1657.81	1657.79	8.6	0.00713	HCD (High Energy Collision Dissociation)	MS2	0	30	44.0887	27939	01082019_Fusion_MASSFIITB_307198_S5.raw	F5			64	FALSE	53	35	8.46697e-06	0	0.0007572	342443936	43.67	Mascot (A5)			Mascot (A5)	cot (A5)	ot (A5)	ot (A5)	8.6
		FALSE	High	Sequest HT (A2)	Unambiguous	[R].SGGGFSSGSAGIINYQR.[R]		1	1	P04264	P04264	0	2	0.702	0	1	1	829.407	1657.81	1657.79	8.6	0.00713	HCD (High Energy Collision Dissociation)	MS2	0	30	44.0887	27939	01082019_Fusion_MASSFIITB_307198_S5.raw	F5		2.55		FALSE				0	0.003531	342443936	43.67	Sequest HT (A2)			Sequest HT (A2	uest HT	est HT	est HT	8.6
		FALSE	High	Sequest HT (A2)	Selected	[R].SGGGFSSGSAGIINYQR.[R]		1	1	P04264	P04264	0	2	0.6909	0	1	1	829.398	1657.79	1657.79	-2.61	-0.00216	HCD (High Energy Collision Dissociation)	MS2	0	30	43.4902	27429	01082019_Fusion_MASSFIITB_307198_S5.raw	F5		3.17		FALSE				0	0.004805	342443936	43.67	Sequest HT (A2)			Sequest HT (A2	uest HT	est HT	est HT	-2.61
	FALSE	High	[R].SGGGFSSGSAGIINYQRR.[T]			FALSE	1	1	3	P04264	P04264 [13-30]	1	1813.89	0	28.6	29.6	10.8	630.2	34.8	61		105.1			High	Peak Found	Peak Found	High	Peak Found	Peak Found	Not Found	High	Not Found	High	High	0	0	0.01126	0.001617	3.61	31		R.SGGGFSSGSAGIINYQRR.T	[13-30]
		Checked	Confidence	Identifying Node	PSM Ambiguity	Annotated Sequence	Modifications	# Protein Groups	# Proteins	Master Protein Accessions	Protein Accessions	# Missed Cleavages	Charge	DeltaScore	DeltaCn	Rank	Search Engine Rank	m/z [Da]	MH+ [Da]	Theo. MH+ [Da]	DeltaM [ppm]	Deltam/z [Da]	Activation Type	MS Order	Isolation Interference [%]	Ion Inject Time [ms]	RT [min]	First Scan	Spectrum File	File ID	Quan Info	XCorr	Ions Score	Contaminant	Identity Strict	Identity Relaxed	Expectation Value	Percolator q-Value	Percolator PEP	Precursor Abundance	Apex RT [min]	Identifying Node			Identifying No	ntifying	tifying	tifying	DeltaM [ppm]
		FALSE	High	Sequest HT (A2)	Selected	[R].SGGGFSSGSAGIINYQRR.[T]		1	1	P04264	P04264	1	3	0.5402	0	1	1	605.304	1813.9	1813.89	1.61	0.00097	HCD (High Energy Collision Dissociation)	MS2	4.30813	13.791	37.2845	21161	01082019_Fusion_MASSFIITB_307198_S8.raw	F8		3.61		FALSE				0	0.001617			Sequest HT (A2)			Sequest HT (A2	uest HT	est HT	est HT	1.61
		FALSE	High	Sequest HT (A2)	Selected	[R].SGGGFSSGSAGIINYQRR.[T]		1	1	P04264	P04264	1	3	0.4948	0	1	1	605.304	1813.9	1813.89	1.23	0.00074	HCD (High Energy Collision Dissociation)	MS2	15.9002	1.769	37.1535	22352	01082019_Fusion_MASSFIITB_307198_S4.raw	F4		2.91		FALSE				0	0.00292	339966048	37.2	Sequest HT (A2)			Sequest HT (A2	uest HT	est HT	est HT	1.23
		FALSE	High	Sequest HT (A2)	Selected	[R].SGGGFSSGSAGIINYQRR.[T]		1	1	P04264	P04264	1	3	0.4679	0	1	1	605.304	1813.9	1813.89	1.98	0.0012	HCD (High Energy Collision Dissociation)	MS2	4.75639	23.5	37.3893	22172	01082019_Fusion_MASSFIITB_307198_S1.raw	F1		3.12		FALSE				0.006585	0.08943	4194944	37.68	Sequest HT (A2)			Sequest HT (A2	uest HT	est HT	est HT	1.98
	FALSE	High	[R].SGYRSGGGFSSGSAGIINYQR.[R]			FALSE	1	1	3	P04264	P04264 [9-29]	1	2121.01	0	109.3	48.1		351.4	242.7	42.8		105.6			Peak Found	Peak Found	Not Found	High	High	Peak Found	Not Found	Peak Found	Not Found	High	High	0	0	2.895e-06	6.57e-07	4.62	71		R.SGYRSGGGFSSGSAGIINYQR.R	[9-29]
		Checked	Confidence	Identifying Node	PSM Ambiguity	Annotated Sequence	Modifications	# Protein Groups	# Proteins	Master Protein Accessions	Protein Accessions	# Missed Cleavages	Charge	DeltaScore	DeltaCn	Rank	Search Engine Rank	m/z [Da]	MH+ [Da]	Theo. MH+ [Da]	DeltaM [ppm]	Deltam/z [Da]	Activation Type	MS Order	Isolation Interference [%]	Ion Inject Time [ms]	RT [min]	First Scan	Spectrum File	File ID	Quan Info	XCorr	Ions Score	Contaminant	Identity Strict	Identity Relaxed	Expectation Value	Percolator q-Value	Percolator PEP	Precursor Abundance	Apex RT [min]	Identifying Node			Identifying No	ntifying	tifying	tifying	DeltaM [ppm]
		FALSE	High	Sequest HT (A2)	Unambiguous	[R].SGYRSGGGFSSGSAGIINYQR.[R]		1	1	P04264	P04264	1	3	0.7251	0	1	1	707.675	2121.01	2121.01	-0.43	-0.00031	HCD (High Energy Collision Dissociation)	MS2	0	30	39.5639	24360	01082019_Fusion_MASSFIITB_307198_S4.raw	F4		4.62		FALSE				0	6.57e-07	26944754	39.68	Sequest HT (A2)			Sequest HT (A2	uest HT	est HT	est HT	-0.43
		FALSE	High	Mascot (A5)	Unambiguous	[R].SGYRSGGGFSSGSAGIINYQR.[R]		1	1	P04264	P04264	1	3	1	0	1	1	707.675	2121.01	2121.01	-0.43	-0.00031	HCD (High Energy Collision Dissociation)	MS2	0	30	39.5639	24360	01082019_Fusion_MASSFIITB_307198_S4.raw	F4			71	FALSE	51	34	1.31073e-06	0	2.895e-06	26944754	39.68	Mascot (A5)			Mascot (A5)	cot (A5)	ot (A5)	ot (A5)	-0.43
		FALSE	High	Sequest HT (A2)	Selected	[R].SGYRSGGGFSSGSAGIINYQR.[R]		1	1	P04264	P04264	1	3	0.7424	0	1	1	707.676	2121.01	2121.01	0.91	0.00064	HCD (High Energy Collision Dissociation)	MS2	0	30	39.4383	23946	01082019_Fusion_MASSFIITB_307198_S5.raw	F5		4.27		FALSE				0	7.667e-06	11294855	39.4	Sequest HT (A2)			Sequest HT (A2	uest HT	est HT	est HT	0.91
	FALSE	High	[K].SKAEAESLYQSK.[Y]			FALSE	1	1	12	P04264	P04264 [365-376]	1	1340.67	0	94.8	100.1	113.9	164.1	124.9	95.4	107.1	99.7			High	High	High	High	High	High	Peak Found	Peak Found	Not Found	High	High	0	0	0.02047	9.761e-05	3.63	29		K.SKAEAESLYQSK.Y	[365-376]					107.1
		Checked	Confidence	Identifying Node	PSM Ambiguity	Annotated Sequence	Modifications	# Protein Groups	# Proteins	Master Protein Accessions	Protein Accessions	# Missed Cleavages	Charge	DeltaScore	DeltaCn	Rank	Search Engine Rank	m/z [Da]	MH+ [Da]	Theo. MH+ [Da]	DeltaM [ppm]	Deltam/z [Da]	Activation Type	MS Order	Isolation Interference [%]	Ion Inject Time [ms]	RT [min]	First Scan	Spectrum File	File ID	Quan Info	XCorr	Ions Score	Contaminant	Identity Strict	Identity Relaxed	Expectation Value	Percolator q-Value	Percolator PEP	Precursor Abundance	Apex RT [min]	Identifying Node			Identifying No	ntifying	tifying	tifying	DeltaM [ppm]
		FALSE	High	Sequest HT (A2)	Unambiguous	[K].SKAEAESLYQSK.[Y]		1	1	P04264	P04264	1	2	0.7163	0	1	1	670.839	1340.67	1340.67	0.58	0.00039	HCD (High Energy Collision Dissociation)	MS2	0	58.268	22.4752	10076	01082019_Fusion_MASSFIITB_307198_S4.raw	F4		3.63		FALSE				0	9.761e-05	618220096	22.13	Sequest HT (A2)			Sequest HT (A2	uest HT	est HT	est HT	0.58
		FALSE	High	Sequest HT (A2)	Selected	[K].SKAEAESLYQSK.[Y]		1	1	P04264	P04264	1	2	0.6741	0	1	1	670.839	1340.67	1340.67	0.52	0.00035	HCD (High Energy Collision Dissociation)	MS2	32.9598	30	21.7055	9109	01082019_Fusion_MASSFIITB_307198_S2.raw	F2		2.7		FALSE				0	0.0006603	209582400	21.89	Sequest HT (A2)			Sequest HT (A2	uest HT	est HT	est HT	0.52
		FALSE	High	Sequest HT (A2)	Unambiguous	[K].SKAEAESLYQSK.[Y]		1	1	P04264	P04264	1	2	0.689	0	1	1	670.838	1340.67	1340.67	0.06	4e-05	HCD (High Energy Collision Dissociation)	MS2	14.1964	30	21.9152	9546	01082019_Fusion_MASSFIITB_307198_S5.raw	F5		2.83		FALSE				0	0.001414	280914208	22.1	Sequest HT (A2)			Sequest HT (A2	uest HT	est HT	est HT	0.06
		FALSE	High	Mascot (A5)	Unambiguous	[K].SKAEAESLYQSK.[Y]		1	1	P04264	P04264	1	2	0.8636	0	1	1	670.839	1340.67	1340.67	0.58	0.00039	HCD (High Energy Collision Dissociation)	MS2	0	58.268	22.4752	10076	01082019_Fusion_MASSFIITB_307198_S4.raw	F4			66	FALSE	53	35	5.31404e-06	0	0.002775	618220096	22.13	Mascot (A5)			Mascot (A5)	cot (A5)	ot (A5)	ot (A5)	0.58
		FALSE	High	Sequest HT (A2)	Unambiguous	[K].SKAEAESLYQSK.[Y]		1	1	P04264	P04264	1	2	0.6756	0	1	1	670.84	1340.67	1340.67	2.08	0.00139	HCD (High Energy Collision Dissociation)	MS2	51.3934	30	21.8429	9663	01082019_Fusion_MASSFIITB_307198_S3.raw	F3		2.62		FALSE				0	0.002857	358466368	22.08	Sequest HT (A2)			Sequest HT (A2	uest HT	est HT	est HT	2.08
		FALSE	High	Sequest HT (A2)	Selected	[K].SKAEAESLYQSK.[Y]		1	1	P04264	P04264	1	3	0.5949	0	1	1	447.561	1340.67	1340.67	-0.69	-0.00031	HCD (High Energy Collision Dissociation)	MS2	21.101	20.077	21.7171	9119	01082019_Fusion_MASSFIITB_307198_S2.raw	F2		3.16		FALSE				0	0.0068	469679008	21.9	Sequest HT (A2)			Sequest HT (A2	uest HT	est HT	est HT	-0.69
		FALSE	High	Sequest HT (A2)	Selected	[K].SKAEAESLYQSK.[Y]		1	1	P04264	P04264	1	3	0.5549	0	1	1	447.561	1340.67	1340.67	-0.16	-7e-05	HCD (High Energy Collision Dissociation)	MS2	13.029	23.856	21.8785	9695	01082019_Fusion_MASSFIITB_307198_S3.raw	F3		3.19		FALSE				0	0.007888	508041312	22.08	Sequest HT (A2)			Sequest HT (A2	uest HT	est HT	est HT	-0.16
		FALSE	High	Sequest HT (A2)	Selected	[K].SKAEAESLYQSK.[Y]		1	1	P04264	P04264	1	3	0.4834	0	1	1	447.561	1340.67	1340.67	-0.53	-0.00023	HCD (High Energy Collision Dissociation)	MS2	12.778	25.652	21.7705	9160	01082019_Fusion_MASSFIITB_307198_S1.raw	F1		3.02		FALSE				0.0004992	0.02096	166087920	21.94	Sequest HT (A2)			Sequest HT (A2	uest HT	est HT	est HT	-0.53
		FALSE	High	Mascot (A5)	Unambiguous	[K].SKAEAESLYQSK.[Y]		1	1	P04264	P04264	1	2	0.8793	0	1	1	670.84	1340.67	1340.67	2.08	0.00139	HCD (High Energy Collision Dissociation)	MS2	51.3934	30	21.8429	9663	01082019_Fusion_MASSFIITB_307198_S3.raw	F3			58	FALSE	53	35	3.62482e-05	0.0004792	0.03175	358466368	22.08	Mascot (A5)			Mascot (A5)	cot (A5)	ot (A5)	ot (A5)	2.08
		FALSE	High	Sequest HT (A2)	Selected	[K].SKAEAESLYQSK.[Y]		1	1	P04264	P04264	1	3	0.5994	0	1	1	447.561	1340.67	1340.67	-0.49	-0.00022	HCD (High Energy Collision Dissociation)	MS2	11.6273	27.382	21.9316	9560	01082019_Fusion_MASSFIITB_307198_S5.raw	F5		3.22		FALSE				0.001757	0.03745	432501952	22.1	Sequest HT (A2)			Sequest HT (A2	uest HT	est HT	est HT	-0.49
		FALSE	High	Sequest HT (A2)	Selected	[K].SKAEAESLYQSK.[Y]		1	1	P04264	P04264	1	3	0.5791	0	1	1	447.561	1340.67	1340.67	-0.76	-0.00034	HCD (High Energy Collision Dissociation)	MS2	15.8223	25.688	21.7413	8255	01082019_Fusion_MASSFIITB_307198_S6.raw	F6		2.78		FALSE				0.001899	0.04693	125645992	21.94	Sequest HT (A2)			Sequest HT (A2	uest HT	est HT	est HT	-0.76
		FALSE	High	Mascot (A5)	Unambiguous	[K].SKAEAESLYQSK.[Y]		1	1	P04264	P04264	1	2	0.8889	0	1	1	670.838	1340.67	1340.67	0.06	4e-05	HCD (High Energy Collision Dissociation)	MS2	14.1964	30	21.9152	9546	01082019_Fusion_MASSFIITB_307198_S5.raw	F5			63	FALSE	53	35	1.1188e-05	0.00216	0.04829	280914208	22.1	Mascot (A5)			Mascot (A5)	cot (A5)	ot (A5)	ot (A5)	0.06
	FALSE	High	[K].SKAEAESLYQSKYEELQITAGR.[H]			FALSE	1	1	15	P04264	P04264 [365-386]	2	2501.25	0	83	231.1	58.6	400.2	112.4	14.7					Peak Found	High	High	High	High	Peak Found	Not Found	Not Found	Not Found	High	High	0	0	0.001206	3.823e-12	5.01	45		K.SKAEAESLYQSKYEELQITAGR.H	[365-386]
		Checked	Confidence	Identifying Node	PSM Ambiguity	Annotated Sequence	Modifications	# Protein Groups	# Proteins	Master Protein Accessions	Protein Accessions	# Missed Cleavages	Charge	DeltaScore	DeltaCn	Rank	Search Engine Rank	m/z [Da]	MH+ [Da]	Theo. MH+ [Da]	DeltaM [ppm]	Deltam/z [Da]	Activation Type	MS Order	Isolation Interference [%]	Ion Inject Time [ms]	RT [min]	First Scan	Spectrum File	File ID	Quan Info	XCorr	Ions Score	Contaminant	Identity Strict	Identity Relaxed	Expectation Value	Percolator q-Value	Percolator PEP	Precursor Abundance	Apex RT [min]	Identifying Node			Identifying No	ntifying	tifying	tifying	DeltaM [ppm]
		FALSE	High	Sequest HT (A2)	Unambiguous	[K].SKAEAESLYQSKYEELQITAGR.[H]		1	1	P04264	P04264	2	3	0.6926	0	1	1	834.422	2501.25	2501.25	-0.12	-0.0001	HCD (High Energy Collision Dissociation)	MS2	1.71426	11.794	43.8387	28049	01082019_Fusion_MASSFIITB_307198_S4.raw	F4		5.01		FALSE				0	3.823e-12	347996928	43.38	Sequest HT (A2)			Sequest HT (A2	uest HT	est HT	est HT	-0.12
		FALSE	High	Sequest HT (A2)	Unambiguous	[K].SKAEAESLYQSKYEELQITAGR.[H]		1	1	P04264	P04264	2	3	0.7548	0	1	1	834.421	2501.25	2501.25	-0.96	-0.0008	HCD (High Energy Collision Dissociation)	MS2	5.89775	23.5	43.3637	27304	01082019_Fusion_MASSFIITB_307198_S2.raw	F2		4.65		FALSE				0	6.013e-11	147882544	43.6	Sequest HT (A2)			Sequest HT (A2	uest HT	est HT	est HT	-0.96
		FALSE	High	Sequest HT (A2)	Unambiguous	[K].SKAEAESLYQSKYEELQITAGR.[H]		1	1	P04264	P04264	2	3	0.7143	0	1	1	834.424	2501.26	2501.25	2.01	0.00167	HCD (High Energy Collision Dissociation)	MS2	0	30	43.1542	27469	01082019_Fusion_MASSFIITB_307198_S4.raw	F4		3.57		FALSE				0	6.571e-10	347996928	43.38	Sequest HT (A2)			Sequest HT (A2	uest HT	est HT	est HT	2.01
		FALSE	High	Mascot (A5)	Unambiguous	[K].SKAEAESLYQSKYEELQITAGR.[H]		1	1	P04264	P04264	2	3	1	0	1	1	834.422	2501.25	2501.25	-0.12	-0.0001	HCD (High Energy Collision Dissociation)	MS2	1.71426	11.794	43.8387	28049	01082019_Fusion_MASSFIITB_307198_S4.raw	F4			76	FALSE	53	35	5.12996e-07	0	2.297e-09	347996928	43.38	Mascot (A5)			Mascot (A5)	cot (A5)	ot (A5)	ot (A5)	-0.12
		FALSE	High	Mascot (A5)	Unambiguous	[K].SKAEAESLYQSKYEELQITAGR.[H]		1	1	P04264	P04264	2	3	0.9775	0	1	1	834.421	2501.25	2501.25	-0.96	-0.0008	HCD (High Energy Collision Dissociation)	MS2	5.89775	23.5	43.3637	27304	01082019_Fusion_MASSFIITB_307198_S2.raw	F2			89	FALSE	52	34	2.47914e-08	0	2.344e-08	147882544	43.6	Mascot (A5)			Mascot (A5)	cot (A5)	ot (A5)	ot (A5)	-0.96
		FALSE	High	Mascot (A5)	Unambiguous	[K].SKAEAESLYQSKYEELQITAGR.[H]		1	1	P04264	P04264	2	3	1	0	1	1	834.424	2501.26	2501.25	2.01	0.00167	HCD (High Energy Collision Dissociation)	MS2	0	30	43.1542	27469	01082019_Fusion_MASSFIITB_307198_S4.raw	F4			62	FALSE	53	35	1.39922e-05	0	1.685e-07	347996928	43.38	Mascot (A5)			Mascot (A5)	cot (A5)	ot (A5)	ot (A5)	2.01
		FALSE	High	Sequest HT (A2)	Unambiguous	[K].SKAEAESLYQSKYEELQITAGR.[H]		1	1	P04264	P04264	2	3	0.6796	0	1	1	834.421	2501.25	2501.25	-1.23	-0.00103	HCD (High Energy Collision Dissociation)	MS2	0	25.205	43.2492	27220	01082019_Fusion_MASSFIITB_307198_S5.raw	F5		3.62		FALSE				0	3.735e-07	63154688	43.42	Sequest HT (A2)			Sequest HT (A2	uest HT	est HT	est HT	-1.23
		FALSE	High	Mascot (A5)	Unambiguous	[K].SKAEAESLYQSKYEELQITAGR.[H]		1	1	P04264	P04264	2	3	0.9861	0	1	1	834.421	2501.25	2501.25	-1.23	-0.00103	HCD (High Energy Collision Dissociation)	MS2	0	25.205	43.2492	27220	01082019_Fusion_MASSFIITB_307198_S5.raw	F5			72	FALSE	52	35	1.33526e-06	0	9.458e-07	63154688	43.42	Mascot (A5)			Mascot (A5)	cot (A5)	ot (A5)	ot (A5)	-1.23
		FALSE	High	Sequest HT (A2)	Unambiguous	[K].SKAEAESLYQSKYEELQITAGR.[H]		1	1	P04264	P04264	2	3	0.6336	0	1	1	834.422	2501.25	2501.25	0.02	2e-05	HCD (High Energy Collision Dissociation)	MS2	12.037	30	43.3569	27888	01082019_Fusion_MASSFIITB_307198_S3.raw	F3		2.92		FALSE				0	4.283e-06	38137144	43.47	Sequest HT (A2)			Sequest HT (A2	uest HT	est HT	est HT	0.02
		FALSE	High	Mascot (A5)	Unambiguous	[K].SKAEAESLYQSKYEELQITAGR.[H]		1	1	P04264	P04264	2	3	0.8868	0	1	1	834.422	2501.25	2501.25	0.02	2e-05	HCD (High Energy Collision Dissociation)	MS2	12.037	30	43.3569	27888	01082019_Fusion_MASSFIITB_307198_S3.raw	F3			53	FALSE	52	35	0.000107787	0	6.787e-05	38137144	43.47	Mascot (A5)			Mascot (A5)	cot (A5)	ot (A5)	ot (A5)	0.02
		FALSE	High	Sequest HT (A2)	Selected	[K].SKAEAESLYQSKYEELQITAGR.[H]		1	1	P04264	P04264	2	4	0.597	0	1	1	626.068	2501.25	2501.25	-0.66	-0.00041	HCD (High Energy Collision Dissociation)	MS2	19.2085	23.5	44.0831	28250	01082019_Fusion_MASSFIITB_307198_S4.raw	F4		4.02		FALSE				0	7.623e-05	880361088	43.36	Sequest HT (A2)			Sequest HT (A2	uest HT	est HT	est HT	-0.66
		FALSE	High	Sequest HT (A2)	Selected	[K].SKAEAESLYQSKYEELQITAGR.[H]		1	1	P04264	P04264	2	4	0.5511	0	1	1	626.069	2501.25	2501.25	0.25	0.00016	HCD (High Energy Collision Dissociation)	MS2	8.04086	6.279	43.3576	27299	01082019_Fusion_MASSFIITB_307198_S2.raw	F2		3.72		FALSE				0	8.79e-05	363617824	43.59	Sequest HT (A2)			Sequest HT (A2	uest HT	est HT	est HT	0.25
		FALSE	High	Sequest HT (A2)	Selected	[K].SKAEAESLYQSKYEELQITAGR.[H]		1	1	P04264	P04264	2	4	0.6751	0	1	1	626.068	2501.25	2501.25	0.02	1e-05	HCD (High Energy Collision Dissociation)	MS2	6.63439	2.52	43.9208	28114	01082019_Fusion_MASSFIITB_307198_S4.raw	F4		3.17		FALSE				0	0.0001485	880361088	43.36	Sequest HT (A2)			Sequest HT (A2	uest HT	est HT	est HT	0.02
		FALSE	High	Sequest HT (A2)	Selected	[K].SKAEAESLYQSKYEELQITAGR.[H]		1	1	P04264	P04264	2	4	0.5714	0	1	1	626.069	2501.25	2501.25	0.34	0.00021	HCD (High Energy Collision Dissociation)	MS2	11.704	10.152	43.376	27906	01082019_Fusion_MASSFIITB_307198_S3.raw	F3		3.57		FALSE				0	0.0002135	107156000	43.46	Sequest HT (A2)			Sequest HT (A2	uest HT	est HT	est HT	0.34
		FALSE	High	Sequest HT (A2)	Selected	[K].SKAEAESLYQSKYEELQITAGR.[H]		1	1	P04264	P04264	2	4	0.6733	0	1	1	626.069	2501.25	2501.25	0.52	0.00033	HCD (High Energy Collision Dissociation)	MS2	20.6902	3.235	43.3453	27304	01082019_Fusion_MASSFIITB_307198_S5.raw	F5		3.52		FALSE				0	0.001374	146289952	43.39	Sequest HT (A2)			Sequest HT (A2	uest HT	est HT	est HT	0.52
	FALSE	High	[R].LRSEIDNVKK.[Q]			FALSE	1	1	2	P04264	P04264 [408-417]	2	1201.69	0	173.4	106.5	89.7	121.5	88	94.2	76.9	149.8			Peak Found	Peak Found	High	Peak Found	High	Peak Found	Peak Found	Peak Found	Not Found	High	High	0	0	0.003526	0.007598	2.85	40		R.LRSEIDNVKK.Q	[408-417]					76.9
		Checked	Confidence	Identifying Node	PSM Ambiguity	Annotated Sequence	Modifications	# Protein Groups	# Proteins	Master Protein Accessions	Protein Accessions	# Missed Cleavages	Charge	DeltaScore	DeltaCn	Rank	Search Engine Rank	m/z [Da]	MH+ [Da]	Theo. MH+ [Da]	DeltaM [ppm]	Deltam/z [Da]	Activation Type	MS Order	Isolation Interference [%]	Ion Inject Time [ms]	RT [min]	First Scan	Spectrum File	File ID	Quan Info	XCorr	Ions Score	Contaminant	Identity Strict	Identity Relaxed	Expectation Value	Percolator q-Value	Percolator PEP	Precursor Abundance	Apex RT [min]	Identifying Node			Identifying No	ntifying	tifying	tifying	DeltaM [ppm]
		FALSE	High	Sequest HT (A2)	Selected	[R].LRSEIDNVKK.[Q]		1	1	P04264	P04264	2	3	0.3863	0	1	1	401.234	1201.69	1201.69	-0.88	-0.00035	HCD (High Energy Collision Dissociation)	MS2	19.8072	30	17.5696	5901	01082019_Fusion_MASSFIITB_307198_S5.raw	F5		2.77		FALSE				0	0.002619	43842164	17.63	Sequest HT (A2)			Sequest HT (A2	uest HT	est HT	est HT	-0.88
		FALSE	High	Sequest HT (A2)	Selected	[R].LRSEIDNVKK.[Q]		1	1	P04264	P04264	2	3	0.3719	0	1	1	401.234	1201.69	1201.69	-1.41	-0.00057	HCD (High Energy Collision Dissociation)	MS2	47.9703	30	17.5672	6172	01082019_Fusion_MASSFIITB_307198_S3.raw	F3		2.85		FALSE				0	0.007598	59519844	17.64	Sequest HT (A2)			Sequest HT (A2	uest HT	est HT	est HT	-1.41
	FALSE	High	[K].NMQDMVEDYR.[N]			FALSE	1	1	4	P04264	P04264 [258-267]	0	1300.53	0	23.8	272.2	267.3		336.7						Peak Found	High	High	Not Found	Peak Found	Not Found	Not Found	Not Found	Not Found	High	High	0	0.0002645	0.02305	0.01529	2.41	43		K.NMQDMVEDYR.N	[258-267]
		Checked	Confidence	Identifying Node	PSM Ambiguity	Annotated Sequence	Modifications	# Protein Groups	# Proteins	Master Protein Accessions	Protein Accessions	# Missed Cleavages	Charge	DeltaScore	DeltaCn	Rank	Search Engine Rank	m/z [Da]	MH+ [Da]	Theo. MH+ [Da]	DeltaM [ppm]	Deltam/z [Da]	Activation Type	MS Order	Isolation Interference [%]	Ion Inject Time [ms]	RT [min]	First Scan	Spectrum File	File ID	Quan Info	XCorr	Ions Score	Contaminant	Identity Strict	Identity Relaxed	Expectation Value	Percolator q-Value	Percolator PEP	Precursor Abundance	Apex RT [min]	Identifying Node			Identifying No	ntifying	tifying	tifying	DeltaM [ppm]
		FALSE	High	Sequest HT (A2)	Unambiguous	[K].NMQDMVEDYR.[N]		1	1	P04264	P04264	0	2	0.7118	0	1	1	650.769	1300.53	1300.53	0.2	0.00013	HCD (High Energy Collision Dissociation)	MS2	50.296	14.62	44.3204	28739	01082019_Fusion_MASSFIITB_307198_S3.raw	F3		2.29		FALSE				0	0.005183	31143604	44.34	Sequest HT (A2)			Sequest HT (A2	uest HT	est HT	est HT	0.2
		FALSE	High	Sequest HT (A2)	Unambiguous	[K].NMQDMVEDYR.[N]		1	1	P04264	P04264	0	2	0.7386	0	1	1	650.769	1300.53	1300.53	0.5	0.00032	HCD (High Energy Collision Dissociation)	MS2	49.2779	23.5	44.3913	28227	01082019_Fusion_MASSFIITB_307198_S2.raw	F2		2.41		FALSE				0.0002645	0.01529	28293368	44.42	Sequest HT (A2)			Sequest HT (A2	uest HT	est HT	est HT	0.5
		FALSE	High	Mascot (A5)	Unambiguous	[K].NMQDMVEDYR.[N]		1	1	P04264	P04264	0	2	1	0	1	1	650.769	1300.53	1300.53	0.2	0.00013	HCD (High Energy Collision Dissociation)	MS2	50.296	14.62	44.3204	28739	01082019_Fusion_MASSFIITB_307198_S3.raw	F3			43	FALSE	43	25	0.000116738	0	0.02305	31143604	44.34	Mascot (A5)			Mascot (A5)	cot (A5)	ot (A5)	ot (A5)	0.2
		FALSE	High	Mascot (A5)	Unambiguous	[K].NMQDMVEDYR.[N]		1	1	P04264	P04264	0	2	1	0	1	1	650.769	1300.53	1300.53	0.5	0.00032	HCD (High Energy Collision Dissociation)	MS2	49.2779	23.5	44.3913	28227	01082019_Fusion_MASSFIITB_307198_S2.raw	F2			55	FALSE	43	25	8.30255e-06	0.003871	0.0734	28293368	44.42	Mascot (A5)			Mascot (A5)	cot (A5)	ot (A5)	ot (A5)	0.5
	FALSE	High	[K].NMQDMVEDYR.[N]	2xOxidation [M2; M5]		FALSE	1	1	9	P04264	P04264 [258-267]	0	1332.52	0	92.8	108.8	172.4	52.9	50.6	110.5	162	149.9			High	High	High	High	High	Peak Found	Peak Found	Peak Found	Not Found	High	High	0	0	0.01902	0.001231	2.38	42	2xOxidation [M2; M5]	K.NMQDMVEDYR.N	[258-267]	2xOxidation [M	xidation	idation	idation	162
		Checked	Confidence	Identifying Node	PSM Ambiguity	Annotated Sequence	Modifications	# Protein Groups	# Proteins	Master Protein Accessions	Protein Accessions	# Missed Cleavages	Charge	DeltaScore	DeltaCn	Rank	Search Engine Rank	m/z [Da]	MH+ [Da]	Theo. MH+ [Da]	DeltaM [ppm]	Deltam/z [Da]	Activation Type	MS Order	Isolation Interference [%]	Ion Inject Time [ms]	RT [min]	First Scan	Spectrum File	File ID	Quan Info	XCorr	Ions Score	Contaminant	Identity Strict	Identity Relaxed	Expectation Value	Percolator q-Value	Percolator PEP	Precursor Abundance	Apex RT [min]	Identifying Node			Identifying No	ntifying	tifying	tifying	DeltaM [ppm]
		FALSE	High	Sequest HT (A2)	Unambiguous	[K].NmQDmVEDYR.[N]	M2(Oxidation); M5(Oxidation)	1	1	P04264	P04264	0	2	0.7857	0	1	1	666.764	1332.52	1332.52	0.26	0.00018	HCD (High Energy Collision Dissociation)	MS2	20.8163	27.856	26.4777	13203	01082019_Fusion_MASSFIITB_307198_S5.raw	F5		2.38		FALSE				0	0.001231	11633013	26.51	Sequest HT (A2)			Sequest HT (A2	uest HT	est HT	est HT	0.26
		FALSE	High	Sequest HT (A2)	Unambiguous	[K].NmQDmVEDYR.[N]	M2(Oxidation); M5(Oxidation)	1	1	P04264	P04264	0	2	0.7723	0	1	1	666.764	1332.52	1332.52	0.92	0.00061	HCD (High Energy Collision Dissociation)	MS2	32.2485	29.915	27.1219	14085	01082019_Fusion_MASSFIITB_307198_S3.raw	F3		2.24		FALSE				0	0.01347	24067446	26.63	Sequest HT (A2)			Sequest HT (A2	uest HT	est HT	est HT	0.92
		FALSE	High	Mascot (A5)	Selected	[K].NmQDmVEDYR.[N]	M2(Oxidation); M5(Oxidation)	1	1	P04264	P04264	0	2	1	0	1	1	666.764	1332.52	1332.52	1.38	0.00092	HCD (High Energy Collision Dissociation)	MS2	23.835	23.917	26.516	12956	01082019_Fusion_MASSFIITB_307198_S2.raw	F2			44	FALSE	39	22	3.69828e-05	0	0.01409	17909676	26.65	Mascot (A5)			Mascot (A5)	cot (A5)	ot (A5)	ot (A5)	1.38
		FALSE	High	Mascot (A5)	Unambiguous	[K].NmQDmVEDYR.[N]	M2(Oxidation); M5(Oxidation)	1	1	P04264	P04264	0	2	1	0	1	1	666.764	1332.52	1332.52	0.26	0.00018	HCD (High Energy Collision Dissociation)	MS2	20.8163	27.856	26.4777	13203	01082019_Fusion_MASSFIITB_307198_S5.raw	F5			51	FALSE	39	22	8.22243e-06	0.001183	0.03438	11633013	26.51	Mascot (A5)			Mascot (A5)	cot (A5)	ot (A5)	ot (A5)	0.26
		FALSE	High	Mascot (A5)	Selected	[K].NmQDmVEDYR.[N]	M2(Oxidation); M5(Oxidation)	1	1	P04264	P04264	0	2	1	0	1	1	666.763	1332.52	1332.52	-0.07	-5e-05	HCD (High Energy Collision Dissociation)	MS2	21.1973	30	26.4578	13345	01082019_Fusion_MASSFIITB_307198_S4.raw	F4			67	FALSE	39	22	1.78238e-07	0.001629	0.03603	20052202	26.53	Mascot (A5)			Mascot (A5)	cot (A5)	ot (A5)	ot (A5)	-0.07
		FALSE	High	Mascot (A5)	Unambiguous	[K].NmQDmVEDYR.[N]	M2(Oxidation); M5(Oxidation)	1	1	P04264	P04264	0	2	1	0	1	1	666.764	1332.52	1332.52	0.92	0.00061	HCD (High Energy Collision Dissociation)	MS2	32.2485	29.915	27.1219	14085	01082019_Fusion_MASSFIITB_307198_S3.raw	F3			54	FALSE	39	22	3.82825e-06	0.001748	0.03871	24067446	26.63	Mascot (A5)			Mascot (A5)	cot (A5)	ot (A5)	ot (A5)	0.92
		FALSE	High	Mascot (A5)	Selected	[K].NmQDmVEDYR.[N]	M2(Oxidation); M5(Oxidation)	1	1	P04264	P04264	0	2	1	0	1	1	666.764	1332.52	1332.52	0.2	0.00013	HCD (High Energy Collision Dissociation)	MS2	41.2243	30	26.5143	12980	01082019_Fusion_MASSFIITB_307198_S1.raw	F1			49	FALSE	39	22	1.20781e-05	0.00399	0.08254	9566526	26.59	Mascot (A5)			Mascot (A5)	cot (A5)	ot (A5)	ot (A5)	0.2
		FALSE	High	Mascot (A5)	Selected	[K].NmQDmVEDYR.[N]	M2(Oxidation); M5(Oxidation)	1	1	P04264	P04264	0	2	1	0	1	1	666.764	1332.52	1332.52	0.4	0.00027	HCD (High Energy Collision Dissociation)	MS2	22.9706	30.322	27.1942	13520	01082019_Fusion_MASSFIITB_307198_S2.raw	F2			54	FALSE	39	22	3.63078e-06	0.008385	0.1289	11818933	27.19	Mascot (A5)			Mascot (A5)	cot (A5)	ot (A5)	ot (A5)	0.4
		FALSE	High	Mascot (A5)	Selected	[K].NmQDmVEDYR.[N]	M2(Oxidation); M5(Oxidation)	1	1	P04264	P04264	0	2	1	0	1	1	666.763	1332.52	1332.52	-0.06	-4e-05	HCD (High Energy Collision Dissociation)	MS2	49.7364	14.036	27.1415	13897	01082019_Fusion_MASSFIITB_307198_S4.raw	F4			49	FALSE	39	22	1.3122e-05	0.02907	0.2368			Mascot (A5)			Mascot (A5)	cot (A5)	ot (A5)	ot (A5)	-0.06
	FALSE	High	[R].NSKIEISELNR.[V]			FALSE	1	1	1	P04264	P04264 [393-403]	1	1302.7	0	65.8	165.4	221.8	212.4	159.2		75.5				Peak Found	Peak Found	Peak Found	High	Peak Found	Not Found	Peak Found	Not Found	Not Found	High	High	0	0.001757	0.002365	0.03756	2.48	42		R.NSKIEISELNR.V	[393-403]					75.5
		Checked	Confidence	Identifying Node	PSM Ambiguity	Annotated Sequence	Modifications	# Protein Groups	# Proteins	Master Protein Accessions	Protein Accessions	# Missed Cleavages	Charge	DeltaScore	DeltaCn	Rank	Search Engine Rank	m/z [Da]	MH+ [Da]	Theo. MH+ [Da]	DeltaM [ppm]	Deltam/z [Da]	Activation Type	MS Order	Isolation Interference [%]	Ion Inject Time [ms]	RT [min]	First Scan	Spectrum File	File ID	Quan Info	XCorr	Ions Score	Contaminant	Identity Strict	Identity Relaxed	Expectation Value	Percolator q-Value	Percolator PEP	Precursor Abundance	Apex RT [min]	Identifying Node			Identifying No	ntifying	tifying	tifying	DeltaM [ppm]
		FALSE	High	Sequest HT (A2)	Selected	[R].NSKIEISELNR.[V]		1	1	P04264	P04264	1	2	0.4224	0	1	1	651.855	1302.7	1302.7	0.44	0.00029	HCD (High Energy Collision Dissociation)	MS2	14.985	23.5	31.3946	17493	01082019_Fusion_MASSFIITB_307198_S4.raw	F4		2.32		FALSE				0	0.0008186	17043488	31.38	Sequest HT (A2)			Sequest HT (A2	uest HT	est HT	est HT	0.44
	FALSE	High	[K].NKLNDLEDALQQAK.[E]			FALSE	1	1	9	P04264	P04264 [442-455]	1	1599.83	0	218.4	152.3	129.7	100.8	175.8	86.3	7.3	29.4			High	High	Peak Found	High	High	High	Peak Found	Peak Found	Not Found	High	High	0	0	0.005045	2.267e-05	5.34	29		K.NKLNDLEDALQQAK.E	[442-455]					7.3
		Checked	Confidence	Identifying Node	PSM Ambiguity	Annotated Sequence	Modifications	# Protein Groups	# Proteins	Master Protein Accessions	Protein Accessions	# Missed Cleavages	Charge	DeltaScore	DeltaCn	Rank	Search Engine Rank	m/z [Da]	MH+ [Da]	Theo. MH+ [Da]	DeltaM [ppm]	Deltam/z [Da]	Activation Type	MS Order	Isolation Interference [%]	Ion Inject Time [ms]	RT [min]	First Scan	Spectrum File	File ID	Quan Info	XCorr	Ions Score	Contaminant	Identity Strict	Identity Relaxed	Expectation Value	Percolator q-Value	Percolator PEP	Precursor Abundance	Apex RT [min]	Identifying Node			Identifying No	ntifying	tifying	tifying	DeltaM [ppm]
		FALSE	High	Sequest HT (A2)	Unambiguous	[K].NKLNDLEDALQQAK.[E]		1	1	P04264	P04264	1	3	0.6536	0	1	1	533.949	1599.83	1599.83	-0.04	-2e-05	HCD (High Energy Collision Dissociation)	MS2	1.52104	23.5	48.3471	32024	01082019_Fusion_MASSFIITB_307198_S4.raw	F4		5.34		FALSE				0	2.267e-05	97952784	48.27	Sequest HT (A2)			Sequest HT (A2	uest HT	est HT	est HT	-0.04
		FALSE	High	Sequest HT (A2)	Selected	[K].NKLNDLEDALQQAK.[E]		1	1	P04264	P04264	1	3	0.633	0	1	1	533.949	1599.83	1599.83	-0.11	-6e-05	HCD (High Energy Collision Dissociation)	MS2	1.33679	7.354	48.4017	31693	01082019_Fusion_MASSFIITB_307198_S5.raw	F5		4.36		FALSE				0	7.928e-05	102445536	48.31	Sequest HT (A2)			Sequest HT (A2	uest HT	est HT	est HT	-0.11
		FALSE	High	Sequest HT (A2)	Selected	[K].NKLNDLEDALQQAK.[E]		1	1	P04264	P04264	1	3	0.6261	0	1	1	533.949	1599.83	1599.83	-0.9	-0.00048	HCD (High Energy Collision Dissociation)	MS2	27.786	23.5	47.9873	31498	01082019_Fusion_MASSFIITB_307198_S2.raw	F2		4.52		FALSE				0	0.0002218	112480704	48.19	Sequest HT (A2)			Sequest HT (A2	uest HT	est HT	est HT	-0.9
		FALSE	High	Sequest HT (A2)	Unambiguous	[K].NKLNDLEDALQQAK.[E]		1	1	P04264	P04264	1	2	0.6642	0	1	1	800.42	1599.83	1599.83	-0.66	-0.00052	HCD (High Energy Collision Dissociation)	MS2	26.2949	30	48.0458	31378	01082019_Fusion_MASSFIITB_307198_S5.raw	F5		2.65		FALSE				0	0.0002434	105972784	48.3	Sequest HT (A2)			Sequest HT (A2	uest HT	est HT	est HT	-0.66
		FALSE	High	Mascot (A5)	Unambiguous	[K].NKLNDLEDALQQAK.[E]		1	1	P04264	P04264	1	2	0.9595	0	1	1	800.42	1599.83	1599.83	-0.66	-0.00052	HCD (High Energy Collision Dissociation)	MS2	26.2949	30	48.0458	31378	01082019_Fusion_MASSFIITB_307198_S5.raw	F5			74	FALSE	54	36	9.9012e-07	0	0.000392	105972784	48.3	Mascot (A5)			Mascot (A5)	cot (A5)	ot (A5)	ot (A5)	-0.66
		FALSE	High	Sequest HT (A2)	Selected	[K].NKLNDLEDALQQAK.[E]		1	1	P04264	P04264	1	3	0.5599	0	1	1	533.948	1599.83	1599.83	-1.88	-0.001	HCD (High Energy Collision Dissociation)	MS2	17.0982	23.5	47.9337	31517	01082019_Fusion_MASSFIITB_307198_S1.raw	F1		3.09		FALSE				0	0.0006793	67232768	48.13	Sequest HT (A2)			Sequest HT (A2	uest HT	est HT	est HT	-1.88
		FALSE	High	Sequest HT (A2)	Selected	[K].NKLNDLEDALQQAK.[E]		1	1	P04264	P04264	1	3	0.5673	0	1	1	533.949	1599.83	1599.83	0.13	7e-05	HCD (High Energy Collision Dissociation)	MS2	19.5185	30	48.0885	29571	01082019_Fusion_MASSFIITB_307198_S6.raw	F6		3.12		FALSE				0	0.0008112	34769964	48.27	Sequest HT (A2)			Sequest HT (A2	uest HT	est HT	est HT	0.13
		FALSE	High	Mascot (A5)	Unambiguous	[K].NKLNDLEDALQQAK.[E]		1	1	P04264	P04264	1	3	0.9221	0	1	1	533.949	1599.83	1599.83	-0.04	-2e-05	HCD (High Energy Collision Dissociation)	MS2	1.52104	23.5	48.3471	32024	01082019_Fusion_MASSFIITB_307198_S4.raw	F4			77	FALSE	54	36	5.65939e-07	0	0.0008177	97952784	48.27	Mascot (A5)			Mascot (A5)	cot (A5)	ot (A5)	ot (A5)	-0.04
		FALSE	High	Sequest HT (A2)	Selected	[K].NKLNDLEDALQQAK.[E]		1	1	P04264	P04264	1	2	0.6641	0	1	1	800.419	1599.83	1599.83	-1.64	-0.00131	HCD (High Energy Collision Dissociation)	MS2	28.2536	30	47.9961	31727	01082019_Fusion_MASSFIITB_307198_S4.raw	F4		2.56		FALSE				0.0002645	0.01565	98913584	48.28	Sequest HT (A2)			Sequest HT (A2	uest HT	est HT	est HT	-1.64
	FALSE	High	[K].NKLNDLEDALQQAKEDLAR.[L]			FALSE	1	1	1	P04264	P04264 [442-460]	2	2184.13	0	17	353		530							Peak Found	Peak Found	Not Found	High	Not Found	Not Found	Not Found	Not Found	Not Found	High	High	0	0	0.0001417	0.0002513	2.95	35		K.NKLNDLEDALQQAKEDLAR.L	[442-460]
		Checked	Confidence	Identifying Node	PSM Ambiguity	Annotated Sequence	Modifications	# Protein Groups	# Proteins	Master Protein Accessions	Protein Accessions	# Missed Cleavages	Charge	DeltaScore	DeltaCn	Rank	Search Engine Rank	m/z [Da]	MH+ [Da]	Theo. MH+ [Da]	DeltaM [ppm]	Deltam/z [Da]	Activation Type	MS Order	Isolation Interference [%]	Ion Inject Time [ms]	RT [min]	First Scan	Spectrum File	File ID	Quan Info	XCorr	Ions Score	Contaminant	Identity Strict	Identity Relaxed	Expectation Value	Percolator q-Value	Percolator PEP	Precursor Abundance	Apex RT [min]	Identifying Node			Identifying No	ntifying	tifying	tifying	DeltaM [ppm]
		FALSE	High	Sequest HT (A2)	Selected	[K].NKLNDLEDALQQAKEDLAR.[L]		1	1	P04264	P04264	2	3	0.5322	0	1	1	728.714	2184.13	2184.13	1.01	0.00074	HCD (High Energy Collision Dissociation)	MS2	36.1841	21.198	62.0256	44013	01082019_Fusion_MASSFIITB_307198_S4.raw	F4		2.95		FALSE				0	0.0002513	98384728	62.28	Sequest HT (A2)			Sequest HT (A2	uest HT	est HT	est HT	1.01
	FALSE	High	[KR].NKYEDEINKR.[T]			TRUE	5	10	6	P04264; P04259; P02538; P05787; P13647	P04264 [268-277]; P04259 [251-260]; P02538 [251-260]; P05787 [177-186]; P13647 [256-265]	2	1308.65	0	59.6	191.7	126.7	229.1	252.1	12.8	11.5	16.4		Shared	High	High	High	High	High	Peak Found	Peak Found	Peak Found	Not Found	High	High	0	0	0.007499	0.000104	3.94	36		R.NKYEDEINKR.T	[268-277]					11.5
		Checked	Confidence	Identifying Node	PSM Ambiguity	Annotated Sequence	Modifications	# Protein Groups	# Proteins	Master Protein Accessions	Protein Accessions	# Missed Cleavages	Charge	DeltaScore	DeltaCn	Rank	Search Engine Rank	m/z [Da]	MH+ [Da]	Theo. MH+ [Da]	DeltaM [ppm]	Deltam/z [Da]	Activation Type	MS Order	Isolation Interference [%]	Ion Inject Time [ms]	RT [min]	First Scan	Spectrum File	File ID	Quan Info	XCorr	Ions Score	Contaminant	Identity Strict	Identity Relaxed	Expectation Value	Percolator q-Value	Percolator PEP	Precursor Abundance	Apex RT [min]	Identifying Node			Identifying No	ntifying	tifying	tifying	DeltaM [ppm]
		FALSE	High	Sequest HT (A2)	Selected	[KR].NKYEDEINKR.[T]		5	10	P04264; P04259; P02538; P05787; P13647	F8W0C6; P04264; P04259; P02538; P48668; F8VUG2; F8VP67; F8W1U3; P05787; P13647	2	3	0.6526	0	1	1	436.889	1308.65	1308.65	-0.33	-0.00014	HCD (High Energy Collision Dissociation)	MS2	0.0836289	3.091	20.2258	7913	01082019_Fusion_MASSFIITB_307198_S2.raw	F2		3.8		TRUE				0	7.614e-05	530301216	20.24	Sequest HT (A2)			Sequest HT (A2	uest HT	est HT	est HT	-0.33
		FALSE	High	Sequest HT (A2)	Selected	[KR].NKYEDEINKR.[T]		5	10	P04264; P04259; P02538; P05787; P13647	F8W0C6; P04264; P04259; P02538; P48668; F8VUG2; F8VP67; F8W1U3; P05787; P13647	2	3	0.6701	0	1	1	436.89	1308.65	1308.65	-0.18	-8e-05	HCD (High Energy Collision Dissociation)	MS2	1.2573	20.482	20.3695	8446	01082019_Fusion_MASSFIITB_307198_S3.raw	F3		3.94		TRUE				0	0.000104	392878112	20.11	Sequest HT (A2)			Sequest HT (A2	uest HT	est HT	est HT	-0.18
		FALSE	High	Sequest HT (A2)	Selected	[KR].NKYEDEINKR.[T]		5	10	P04264; P04259; P02538; P05787; P13647	F8W0C6; P04264; P04259; P02538; P48668; F8VUG2; F8VP67; F8W1U3; P05787; P13647	2	3	0.6035	0	1	1	436.89	1308.65	1308.65	-0.15	-6e-05	HCD (High Energy Collision Dissociation)	MS2	6.14261	30	20.4168	8102	01082019_Fusion_MASSFIITB_307198_S1.raw	F1		2.85		TRUE				0	0.0001417	62178812	20.05	Sequest HT (A2)			Sequest HT (A2	uest HT	est HT	est HT	-0.15
		FALSE	High	Sequest HT (A2)	Selected	[KR].NKYEDEINKR.[T]		5	10	P04264; P04259; P02538; P05787; P13647	F8W0C6; P04264; P04259; P02538; P48668; F8VUG2; F8VP67; F8W1U3; P05787; P13647	2	3	0.6909	0	1	1	436.889	1308.65	1308.65	-0.49	-0.00021	HCD (High Energy Collision Dissociation)	MS2	12.7182	30	20.4727	8351	01082019_Fusion_MASSFIITB_307198_S5.raw	F5		3.17		TRUE				0	0.0002659	585574336	20.15	Sequest HT (A2)			Sequest HT (A2	uest HT	est HT	est HT	-0.49
		FALSE	High	Sequest HT (A2)	Selected	[KR].NKYEDEINKR.[T]		5	10	P04264; P04259; P02538; P05787; P13647	F8W0C6; P04264; P04259; P02538; P48668; F8VUG2; F8VP67; F8W1U3; P05787; P13647	2	3	0.6508	0	1	1	436.89	1308.66	1308.65	1.87	0.00082	HCD (High Energy Collision Dissociation)	MS2	15.8423	40.894	22.8932	10324	01082019_Fusion_MASSFIITB_307198_S5.raw	F5		3.15		TRUE				0	0.0002742			Sequest HT (A2)			Sequest HT (A2	uest HT	est HT	est HT	1.87
		FALSE	High	Sequest HT (A2)	Selected	[KR].NKYEDEINKR.[T]		5	10	P04264; P04259; P02538; P05787; P13647	F8W0C6; P04264; P04259; P02538; P48668; F8VUG2; F8VP67; F8W1U3; P05787; P13647	2	3	0.6934	0	1	1	436.889	1308.65	1308.65	-0.44	-0.00019	HCD (High Energy Collision Dissociation)	MS2	0.885435	2.699	20.3645	8359	01082019_Fusion_MASSFIITB_307198_S4.raw	F4		3.62		TRUE				0	0.0004076	879019200	20.26	Sequest HT (A2)			Sequest HT (A2	uest HT	est HT	est HT	-0.44
	FALSE	High	[K].YEELQITAGR.[H]			FALSE	2	2	21	P04264; P04259	P04264 [377-386]; P04259 [360-369]	0	1179.6	0	122	105.1	136.7	198.9	112	110.9	50.3	53.5	10.5	Shared	High	High	High	High	High	High	High	High	Peak Found	High	High	0	0	0.02283	0.001348	2.49	34		K.YEELQITAGR.H	[377-386]					50.3
		Checked	Confidence	Identifying Node	PSM Ambiguity	Annotated Sequence	Modifications	# Protein Groups	# Proteins	Master Protein Accessions	Protein Accessions	# Missed Cleavages	Charge	DeltaScore	DeltaCn	Rank	Search Engine Rank	m/z [Da]	MH+ [Da]	Theo. MH+ [Da]	DeltaM [ppm]	Deltam/z [Da]	Activation Type	MS Order	Isolation Interference [%]	Ion Inject Time [ms]	RT [min]	First Scan	Spectrum File	File ID	Quan Info	XCorr	Ions Score	Contaminant	Identity Strict	Identity Relaxed	Expectation Value	Percolator q-Value	Percolator PEP	Precursor Abundance	Apex RT [min]	Identifying Node			Identifying No	ntifying	tifying	tifying	DeltaM [ppm]
		FALSE	High	Sequest HT (A2)	Unambiguous	[K].YEELQITAGR.[H]		2	2	P04264; P04259	P04264; P04259	0	2	0.5804	0	1	1	590.304	1179.6	1179.6	1.02	0.0006	HCD (High Energy Collision Dissociation)	MS2	11.9618	9.486	40.9676	25788	01082019_Fusion_MASSFIITB_307198_S3.raw	F3		2.24		FALSE				0	6.904e-05	1396735488	39.87	Sequest HT (A2)			Sequest HT (A2	uest HT	est HT	est HT	1.02
		FALSE	High	Mascot (A5)	Unambiguous	[K].YEELQITAGR.[H]		2	2	P04264; P04259	P04264; P04259	0	2	0.8625	0	1	1	590.304	1179.6	1179.6	-0.43	-0.00025	HCD (High Energy Collision Dissociation)	MS2	0	7.58	40.3597	25051	01082019_Fusion_MASSFIITB_307198_S4.raw	F4			80	FALSE	54	36	2.84909e-07	0	7.329e-05	2515437056	39.87	Mascot (A5)			Mascot (A5)	cot (A5)	ot (A5)	ot (A5)	-0.43
		FALSE	High	Mascot (A5)	Unambiguous	[K].YEELQITAGR.[H]		2	2	P04264; P04259	P04264; P04259	0	2	0.9403	0	1	1	590.304	1179.6	1179.6	1.02	0.0006	HCD (High Energy Collision Dissociation)	MS2	11.9618	9.486	40.9676	25788	01082019_Fusion_MASSFIITB_307198_S3.raw	F3			67	FALSE	54	36	5.23763e-06	0	8.962e-05	1396735488	39.87	Mascot (A5)			Mascot (A5)	cot (A5)	ot (A5)	ot (A5)	1.02
		FALSE	High	Mascot (A5)	Selected	[K].YEELQITAGR.[H]		2	2	P04264; P04259	P04264; P04259	0	2	0.8625	0	1	1	590.304	1179.6	1179.6	0.14	8e-05	HCD (High Energy Collision Dissociation)	MS2	5.75053	23.5	39.6343	24055	01082019_Fusion_MASSFIITB_307198_S2.raw	F2			80	FALSE	54	36	2.76216e-07	0	9.131e-05	961127552	39.82	Mascot (A5)			Mascot (A5)	cot (A5)	ot (A5)	ot (A5)	0.14
		FALSE	High	Mascot (A5)	Unambiguous	[K].YEELQITAGR.[H]		2	2	P04264; P04259	P04264; P04259	0	2	0.8873	0	1	1	590.305	1179.6	1179.6	1.46	0.00086	HCD (High Energy Collision Dissociation)	MS2	1.51992	8.476	39.6676	24446	01082019_Fusion_MASSFIITB_307198_S4.raw	F4			71	FALSE	54	36	2.14357e-06	0	9.586e-05	2515437056	39.87	Mascot (A5)			Mascot (A5)	cot (A5)	ot (A5)	ot (A5)	1.46
		FALSE	High	Mascot (A5)	Selected	[K].YEELQITAGR.[H]		2	2	P04264; P04259	P04264; P04259	0	2	0.9286	0	1	1	590.305	1179.6	1179.6	2.34	0.00138	HCD (High Energy Collision Dissociation)	MS2	0	13.347	39.6208	24105	01082019_Fusion_MASSFIITB_307198_S5.raw	F5			70	FALSE	53	36	2.2205e-06	0	0.0001661	862838464	39.82	Mascot (A5)			Mascot (A5)	cot (A5)	ot (A5)	ot (A5)	2.34
		FALSE	High	Mascot (A5)	Unambiguous	[K].YEELQITAGR.[H]		2	2	P04264; P04259	P04264; P04259	0	2	0.9286	0	1	1	590.304	1179.6	1179.6	0.83	0.00049	HCD (High Energy Collision Dissociation)	MS2	7.77596	23.5	39.6438	24137	01082019_Fusion_MASSFIITB_307198_S1.raw	F1			70	FALSE	54	36	2.55938e-06	0	0.0001964	418857632	39.82	Mascot (A5)			Mascot (A5)	cot (A5)	ot (A5)	ot (A5)	0.83
		FALSE	High	Mascot (A5)	Selected	[K].YEELQITAGR.[H]		2	2	P04264; P04259	P04264; P04259	0	2	0.8873	0	1	1	590.305	1179.6	1179.6	2.04	0.0012	HCD (High Energy Collision Dissociation)	MS2	5.24625	30	39.7182	23111	01082019_Fusion_MASSFIITB_307198_S8.raw	F8			71	FALSE	53	36	2.20458e-06	0	0.0002134	89966168	39.85	Mascot (A5)			Mascot (A5)	cot (A5)	ot (A5)	ot (A5)	2.04
		FALSE	High	Mascot (A5)	Selected	[K].YEELQITAGR.[H]		2	2	P04264; P04259	P04264; P04259	0	2	0.8571	0	1	1	590.304	1179.6	1179.6	-0.24	-0.00014	HCD (High Energy Collision Dissociation)	MS2	13.8064	23.5	40.335	24730	01082019_Fusion_MASSFIITB_307198_S1.raw	F1			70	FALSE	54	36	2.63178e-06	0	0.0002396	418857632	39.82	Mascot (A5)			Mascot (A5)	cot (A5)	ot (A5)	ot (A5)	-0.24
		FALSE	High	Sequest HT (A2)	Unambiguous	[K].YEELQITAGR.[H]		2	2	P04264; P04259	P04264; P04259	0	2	0.4303	0	1	1	590.304	1179.6	1179.6	-0.45	-0.00026	HCD (High Energy Collision Dissociation)	MS2	2.52535	17.576	40.3019	24671	01082019_Fusion_MASSFIITB_307198_S5.raw	F5		2.44		FALSE				0	0.0002639	862838464	39.82	Sequest HT (A2)			Sequest HT (A2	uest HT	est HT	est HT	-0.45
		FALSE	High	Mascot (A5)	Selected	[K].YEELQITAGR.[H]		2	2	P04264; P04259	P04264; P04259	0	2	0.9123	0	1	1	590.306	1179.6	1179.6	3.07	0.00181	HCD (High Energy Collision Dissociation)	MS2	0	30	39.6069	24653	01082019_Fusion_MASSFIITB_307198_S3.raw	F3			57	FALSE	54	36	5.18436e-05	0	0.0003485	1396735488	39.87	Mascot (A5)			Mascot (A5)	cot (A5)	ot (A5)	ot (A5)	3.07
		FALSE	High	Mascot (A5)	Unambiguous	[K].YEELQITAGR.[H]		2	2	P04264; P04259	P04264; P04259	0	2	0.7937	0	1	1	590.304	1179.6	1179.6	-0.45	-0.00026	HCD (High Energy Collision Dissociation)	MS2	2.52535	17.576	40.3019	24671	01082019_Fusion_MASSFIITB_307198_S5.raw	F5			63	FALSE	54	36	1.56569e-05	0	0.000469	862838464	39.82	Mascot (A5)			Mascot (A5)	cot (A5)	ot (A5)	ot (A5)	-0.45
		FALSE	High	Sequest HT (A2)	Unambiguous	[K].YEELQITAGR.[H]		2	2	P04264; P04259	P04264; P04259	0	2	0.3918	0	1	1	590.304	1179.6	1179.6	-0.43	-0.00025	HCD (High Energy Collision Dissociation)	MS2	0	7.58	40.3597	25051	01082019_Fusion_MASSFIITB_307198_S4.raw	F4		2.45		FALSE				0	0.0005696	2515437056	39.87	Sequest HT (A2)			Sequest HT (A2	uest HT	est HT	est HT	-0.43
		FALSE	High	Mascot (A5)	Selected	[K].YEELQITAGR.[H]		2	2	P04264; P04259	P04264; P04259	0	2	0.8696	0	1	1	590.303	1179.6	1179.6	-1.64	-0.00097	HCD (High Energy Collision Dissociation)	MS2	25.5588	14.625	40.6057	24888	01082019_Fusion_MASSFIITB_307198_S2.raw	F2			69	FALSE	53	35	2.76268e-06	0	0.0006487	961127552	39.82	Mascot (A5)			Mascot (A5)	cot (A5)	ot (A5)	ot (A5)	-1.64
		FALSE	High	Mascot (A5)	Selected	[K].YEELQITAGR.[H]		2	2	P04264; P04259	P04264; P04259	0	2	0.9062	0	1	1	590.302	1179.6	1179.6	-2.84	-0.00168	HCD (High Energy Collision Dissociation)	MS2	16.4968	23.5	41.4795	26029	01082019_Fusion_MASSFIITB_307198_S4.raw	F4			64	FALSE	54	36	1.11669e-05	0	0.0007482	2515437056	39.87	Mascot (A5)			Mascot (A5)	cot (A5)	ot (A5)	ot (A5)	-2.84
		FALSE	High	Sequest HT (A2)	Unambiguous	[K].YEELQITAGR.[H]		2	2	P04264; P04259	P04264; P04259	0	2	0.5353	0	1	1	590.304	1179.6	1179.6	0.83	0.00049	HCD (High Energy Collision Dissociation)	MS2	7.77596	23.5	39.6438	24137	01082019_Fusion_MASSFIITB_307198_S1.raw	F1		2.41		FALSE				0	0.0007908	418857632	39.82	Sequest HT (A2)			Sequest HT (A2	uest HT	est HT	est HT	0.83
		FALSE	High	Mascot (A5)	Selected	[K].YEELQITAGR.[H]		2	2	P04264; P04259	P04264; P04259	0	2	0.9296	0	1	1	590.305	1179.6	1179.6	1.48	0.00087	HCD (High Energy Collision Dissociation)	MS2	0	20.091	39.6446	22280	01082019_Fusion_MASSFIITB_307198_S6.raw	F6			71	FALSE	54	36	2.21379e-06	0	0.001165	290290784	39.82	Mascot (A5)			Mascot (A5)	cot (A5)	ot (A5)	ot (A5)	1.48
		FALSE	High	Sequest HT (A2)	Unambiguous	[K].YEELQITAGR.[H]		2	2	P04264; P04259	P04264; P04259	0	2	0.5542	0	1	1	590.305	1179.6	1179.6	1.46	0.00086	HCD (High Energy Collision Dissociation)	MS2	1.51992	8.476	39.6676	24446	01082019_Fusion_MASSFIITB_307198_S4.raw	F4		2.49		FALSE				0	0.001348	2515437056	39.87	Sequest HT (A2)			Sequest HT (A2	uest HT	est HT	est HT	1.46
		FALSE	High	Mascot (A5)	Selected	[K].YEELQITAGR.[H]		2	2	P04264; P04259	P04264; P04259	0	2	0.8182	0	1	1	590.304	1179.6	1179.6	0.19	0.00011	HCD (High Energy Collision Dissociation)	MS2	0	4.302	40.2943	25209	01082019_Fusion_MASSFIITB_307198_S3.raw	F3			77	FALSE	54	36	5.08451e-07	0	0.001647	1396735488	39.87	Mascot (A5)			Mascot (A5)	cot (A5)	ot (A5)	ot (A5)	0.19
		FALSE	High	Mascot (A5)	Selected	[K].YEELQITAGR.[H]		2	2	P04264; P04259	P04264; P04259	0	2	0.9123	0	1	1	590.304	1179.6	1179.6	0.75	0.00044	HCD (High Energy Collision Dissociation)	MS2	7.02728	30.109	39.6523	21159	01082019_Fusion_MASSFIITB_307198_S7.raw	F7			57	FALSE	54	36	5.08317e-05	0	0.001864	33267680	39.82	Mascot (A5)			Mascot (A5)	cot (A5)	ot (A5)	ot (A5)	0.75
		FALSE	High	Mascot (A5)	Selected	[K].YEELQITAGR.[H]		2	2	P04264; P04259	P04264; P04259	0	2	0.7895	0	1	1	590.303	1179.6	1179.6	-0.62	-0.00037	HCD (High Energy Collision Dissociation)	MS2	40.004	30	90.2329	65575	01082019_Fusion_MASSFIITB_307198_S3.raw	F3			57	FALSE	53	35	4.85905e-05	0	0.01103	5386001	90.48	Mascot (A5)			Mascot (A5)	cot (A5)	ot (A5)	ot (A5)	-0.62
	FALSE	High	[K].WELLQQVDTSTR.[T]			FALSE	1	1	38	P04264	P04264 [212-223]	0	1475.75	0	134.2	112.2	105.1	165.9	136.3	129.8	29.1	71.6	15.8		High	High	High	High	High	High	High	High	Peak Found	High	High	0	0	0.0001102	7.537e-05	3.06	53		K.WELLQQVDTSTR.T	[212-223]					29.1
		Checked	Confidence	Identifying Node	PSM Ambiguity	Annotated Sequence	Modifications	# Protein Groups	# Proteins	Master Protein Accessions	Protein Accessions	# Missed Cleavages	Charge	DeltaScore	DeltaCn	Rank	Search Engine Rank	m/z [Da]	MH+ [Da]	Theo. MH+ [Da]	DeltaM [ppm]	Deltam/z [Da]	Activation Type	MS Order	Isolation Interference [%]	Ion Inject Time [ms]	RT [min]	First Scan	Spectrum File	File ID	Quan Info	XCorr	Ions Score	Contaminant	Identity Strict	Identity Relaxed	Expectation Value	Percolator q-Value	Percolator PEP	Precursor Abundance	Apex RT [min]	Identifying Node			Identifying No	ntifying	tifying	tifying	DeltaM [ppm]
		FALSE	High	Sequest HT (A2)	Unambiguous	[K].WELLQQVDTSTR.[T]		1	1	P04264	P04264	0	2	0.6634	0	1	1	738.379	1475.75	1475.75	0.81	0.0006	HCD (High Energy Collision Dissociation)	MS2	8.18468	30	58.1304	41047	01082019_Fusion_MASSFIITB_307198_S3.raw	F3		3.06		FALSE				0	3.68e-07			Sequest HT (A2)			Sequest HT (A2	uest HT	est HT	est HT	0.81
		FALSE	High	Mascot (A5)	Unambiguous	[K].WELLQQVDTSTR.[T]		1	1	P04264	P04264	0	2	0.9231	0	1	1	738.379	1475.75	1475.75	0.81	0.0006	HCD (High Energy Collision Dissociation)	MS2	8.18468	30	58.1304	41047	01082019_Fusion_MASSFIITB_307198_S3.raw	F3			91	FALSE	53	35	1.73039e-08	0	5.641e-07			Mascot (A5)			Mascot (A5)	cot (A5)	ot (A5)	ot (A5)	0.81
		FALSE	High	Sequest HT (A2)	Unambiguous	[K].WELLQQVDTSTR.[T]		1	1	P04264	P04264	0	2	0.6437	0	1	1	738.378	1475.75	1475.75	0.55	0.0004	HCD (High Energy Collision Dissociation)	MS2	3.62193	5.73	54.9375	37751	01082019_Fusion_MASSFIITB_307198_S2.raw	F2		2.61		FALSE				0	1.188e-06	931213056	54.75	Sequest HT (A2)			Sequest HT (A2	uest HT	est HT	est HT	0.55
		FALSE	High	Sequest HT (A2)	Unambiguous	[K].WELLQQVDTSTR.[T]		1	1	P04264	P04264	0	2	0.6691	0	1	1	738.378	1475.75	1475.75	0.09	6e-05	HCD (High Energy Collision Dissociation)	MS2	5.49845	9.39	55.0502	38303	01082019_Fusion_MASSFIITB_307198_S3.raw	F3		2.72		FALSE				0	1.655e-06	904893440	54.76	Sequest HT (A2)			Sequest HT (A2	uest HT	est HT	est HT	0.09
		FALSE	High	Sequest HT (A2)	Unambiguous	[K].WELLQQVDTSTR.[T]		1	1	P04264	P04264	0	2	0.6606	0	1	1	738.378	1475.75	1475.75	-0.18	-0.00013	HCD (High Energy Collision Dissociation)	MS2	0.233057	3.406	54.8882	37398	01082019_Fusion_MASSFIITB_307198_S5.raw	F5		2.74		FALSE				0	2.422e-06	924412480	54.74	Sequest HT (A2)			Sequest HT (A2	uest HT	est HT	est HT	-0.18
		FALSE	High	Mascot (A5)	Unambiguous	[K].WELLQQVDTSTR.[T]		1	1	P04264	P04264	0	2	0.8082	0	1	1	738.378	1475.75	1475.75	0.55	0.0004	HCD (High Energy Collision Dissociation)	MS2	3.62193	5.73	54.9375	37751	01082019_Fusion_MASSFIITB_307198_S2.raw	F2			73	FALSE	53	35	1.11948e-06	0	3.942e-06	931213056	54.75	Mascot (A5)			Mascot (A5)	cot (A5)	ot (A5)	ot (A5)	0.55
		FALSE	High	Sequest HT (A2)	Unambiguous	[K].WELLQQVDTSTR.[T]		1	1	P04264	P04264	0	2	0.6655	0	1	1	738.378	1475.75	1475.75	0.08	6e-05	HCD (High Energy Collision Dissociation)	MS2	1.67532	3.808	54.991	37833	01082019_Fusion_MASSFIITB_307198_S4.raw	F4		2.75		FALSE				0	5.374e-06	1849856512	54.76	Sequest HT (A2)			Sequest HT (A2	uest HT	est HT	est HT	0.08
		FALSE	High	Sequest HT (A2)	Unambiguous	[K].WELLQQVDTSTR.[T]		1	1	P04264	P04264	0	2	0.6582	0	1	1	738.379	1475.75	1475.75	1.12	0.00083	HCD (High Energy Collision Dissociation)	MS2	0.953087	30	54.897	36088	01082019_Fusion_MASSFIITB_307198_S8.raw	F8		2.75		FALSE				0	8.358e-06	105406664	54.69	Sequest HT (A2)			Sequest HT (A2	uest HT	est HT	est HT	1.12
		FALSE	High	Mascot (A5)	Unambiguous	[K].WELLQQVDTSTR.[T]		1	1	P04264	P04264	0	2	0.8056	0	1	1	738.378	1475.75	1475.75	-0.18	-0.00013	HCD (High Energy Collision Dissociation)	MS2	0.233057	3.406	54.8882	37398	01082019_Fusion_MASSFIITB_307198_S5.raw	F5			72	FALSE	53	35	1.25427e-06	0	1.295e-05	924412480	54.74	Mascot (A5)			Mascot (A5)	cot (A5)	ot (A5)	ot (A5)	-0.18
		FALSE	High	Mascot (A5)	Unambiguous	[K].WELLQQVDTSTR.[T]		1	1	P04264	P04264	0	2	0.8537	0	1	1	738.378	1475.75	1475.75	0.14	0.0001	HCD (High Energy Collision Dissociation)	MS2	3.62058	17.009	54.9216	37846	01082019_Fusion_MASSFIITB_307198_S1.raw	F1			82	FALSE	53	35	1.46964e-07	0	1.556e-05	420410496	54.68	Mascot (A5)			Mascot (A5)	cot (A5)	ot (A5)	ot (A5)	0.14
		FALSE	High	Sequest HT (A2)	Unambiguous	[K].WELLQQVDTSTR.[T]		1	1	P04264	P04264	0	2	0.6534	0	1	1	738.378	1475.75	1475.75	0.14	0.0001	HCD (High Energy Collision Dissociation)	MS2	3.62058	17.009	54.9216	37846	01082019_Fusion_MASSFIITB_307198_S1.raw	F1		2.51		FALSE				0	2.245e-05	420410496	54.68	Sequest HT (A2)			Sequest HT (A2	uest HT	est HT	est HT	0.14
		FALSE	High	Mascot (A5)	Unambiguous	[K].WELLQQVDTSTR.[T]		1	1	P04264	P04264	0	2	0.8313	0	1	1	738.378	1475.75	1475.75	0.08	6e-05	HCD (High Energy Collision Dissociation)	MS2	1.67532	3.808	54.991	37833	01082019_Fusion_MASSFIITB_307198_S4.raw	F4			83	FALSE	53	35	1.30982e-07	0	2.285e-05	1849856512	54.76	Mascot (A5)			Mascot (A5)	cot (A5)	ot (A5)	ot (A5)	0.08
		FALSE	High	Sequest HT (A2)	Unambiguous	[K].WELLQQVDTSTR.[T]		1	1	P04264	P04264	0	2	0.6094	0	1	1	738.375	1475.74	1475.75	-3.5	-0.00258	HCD (High Energy Collision Dissociation)	MS2	22.3177	30	56.0059	39153	01082019_Fusion_MASSFIITB_307198_S3.raw	F3		2.33		FALSE				0	2.565e-05			Sequest HT (A2)			Sequest HT (A2	uest HT	est HT	est HT	-3.5
		FALSE	High	Sequest HT (A2)	Unambiguous	[K].WELLQQVDTSTR.[T]		1	1	P04264	P04264	0	2	0.6164	0	1	1	738.378	1475.75	1475.75	-0.21	-0.00016	HCD (High Energy Collision Dissociation)	MS2	2.59599	14.155	56.6968	39770	01082019_Fusion_MASSFIITB_307198_S3.raw	F3		2.32		FALSE				0	3.084e-05	49834152	56.72	Sequest HT (A2)			Sequest HT (A2	uest HT	est HT	est HT	-0.21
		FALSE	High	Mascot (A5)	Unambiguous	[K].WELLQQVDTSTR.[T]		1	1	P04264	P04264	0	2	0.8056	0	1	1	738.378	1475.75	1475.75	0.09	6e-05	HCD (High Energy Collision Dissociation)	MS2	5.49845	9.39	55.0502	38303	01082019_Fusion_MASSFIITB_307198_S3.raw	F3			72	FALSE	53	35	1.36839e-06	0	3.282e-05	904893440	54.76	Mascot (A5)			Mascot (A5)	cot (A5)	ot (A5)	ot (A5)	0.09
		FALSE	High	Mascot (A5)	Unambiguous	[K].WELLQQVDTSTR.[T]		1	1	P04264	P04264	0	2	0.8101	0	1	1	738.378	1475.75	1475.75	-0.21	-0.00016	HCD (High Energy Collision Dissociation)	MS2	2.59599	14.155	56.6968	39770	01082019_Fusion_MASSFIITB_307198_S3.raw	F3			79	FALSE	53	35	2.657e-07	0	3.479e-05	49834152	56.72	Mascot (A5)			Mascot (A5)	cot (A5)	ot (A5)	ot (A5)	-0.21
		FALSE	High	Sequest HT (A2)	Unambiguous	[K].WELLQQVDTSTR.[T]		1	1	P04264	P04264	0	2	0.6705	0	1	1	738.378	1475.75	1475.75	0.21	0.00016	HCD (High Energy Collision Dissociation)	MS2	0	9.757	54.9357	35527	01082019_Fusion_MASSFIITB_307198_S6.raw	F6		2.64		FALSE				0	3.582e-05	297849312	54.78	Sequest HT (A2)			Sequest HT (A2	uest HT	est HT	est HT	0.21
		FALSE	High	Mascot (A5)	Selected	[K].WELLQQVDTSTR.[T]		1	1	P04264	P04264	0	2	0.9012	0	1	1	738.379	1475.75	1475.75	0.82	0.00061	HCD (High Energy Collision Dissociation)	MS2	5.23232	28.192	55.6842	38449	01082019_Fusion_MASSFIITB_307198_S4.raw	F4			81	FALSE	53	35	1.6678e-07	0	4.79e-05	1849856512	54.76	Mascot (A5)			Mascot (A5)	cot (A5)	ot (A5)	ot (A5)	0.82
		FALSE	High	Mascot (A5)	Selected	[K].WELLQQVDTSTR.[T]		1	1	P04264	P04264	0	2	0.8592	0	1	1	738.382	1475.76	1475.75	5.97	0.00441	HCD (High Energy Collision Dissociation)	MS2	37.1379	30	55.7883	38208	01082019_Fusion_MASSFIITB_307198_S5.raw	F5			71	FALSE	54	36	2.13702e-06	0	4.809e-05	924412480	54.74	Mascot (A5)			Mascot (A5)	cot (A5)	ot (A5)	ot (A5)	5.97
		FALSE	High	Sequest HT (A2)	Unambiguous	[K].WELLQQVDTSTR.[T]		1	1	P04264	P04264	0	2	0.5708	0	1	1	738.377	1475.75	1475.75	-1.89	-0.0014	HCD (High Energy Collision Dissociation)	MS2	17.8417	15.548	54.3772	37698	01082019_Fusion_MASSFIITB_307198_S3.raw	F3		2.26		FALSE				0	6.382e-05	904893440	54.76	Sequest HT (A2)			Sequest HT (A2	uest HT	est HT	est HT	-1.89
		FALSE	High	Mascot (A5)	Selected	[K].WELLQQVDTSTR.[T]		1	1	P04264	P04264	0	2	0.8082	0	1	1	738.378	1475.75	1475.75	-0.09	-6e-05	HCD (High Energy Collision Dissociation)	MS2	1.03745	30	54.833	33435	01082019_Fusion_MASSFIITB_307198_S7.raw	F7			73	FALSE	53	35	1.27119e-06	0	6.873e-05	16097001	54.71	Mascot (A5)			Mascot (A5)	cot (A5)	ot (A5)	ot (A5)	-0.09
		FALSE	High	Sequest HT (A2)	Unambiguous	[K].WELLQQVDTSTR.[T]		1	1	P04264	P04264	0	2	0.5512	0	1	1	738.376	1475.74	1475.75	-3.35	-0.00247	HCD (High Energy Collision Dissociation)	MS2	17.8123	30	54.2465	34918	01082019_Fusion_MASSFIITB_307198_S6.raw	F6		3.03		FALSE				0	7.506e-05	9914602	54.31	Sequest HT (A2)			Sequest HT (A2	uest HT	est HT	est HT	-3.35
		FALSE	High	Sequest HT (A2)	Unambiguous	[K].WELLQQVDTSTR.[T]		1	1	P04264	P04264	0	2	0.6046	0	1	1	738.377	1475.75	1475.75	-1.9	-0.0014	HCD (High Energy Collision Dissociation)	MS2	16.2487	23.5	54.3145	37234	01082019_Fusion_MASSFIITB_307198_S4.raw	F4		3.06		FALSE				0	7.537e-05	58346100	54.33	Sequest HT (A2)			Sequest HT (A2	uest HT	est HT	est HT	-1.9
		FALSE	High	Mascot (A5)	Unambiguous	[K].WELLQQVDTSTR.[T]		1	1	P04264	P04264	0	2	0.9605	0	1	1	738.379	1475.75	1475.75	1.12	0.00083	HCD (High Energy Collision Dissociation)	MS2	0.953087	30	54.897	36088	01082019_Fusion_MASSFIITB_307198_S8.raw	F8			76	FALSE	53	35	5.66328e-07	0	8.177e-05	105406664	54.69	Mascot (A5)			Mascot (A5)	cot (A5)	ot (A5)	ot (A5)	1.12
		FALSE	High	Mascot (A5)	Unambiguous	[K].WELLQQVDTSTR.[T]		1	1	P04264	P04264	0	2	0.825	0	1	1	738.378	1475.75	1475.75	0.21	0.00016	HCD (High Energy Collision Dissociation)	MS2	0	9.757	54.9357	35527	01082019_Fusion_MASSFIITB_307198_S6.raw	F6			80	FALSE	53	35	2.64369e-07	0	9.141e-05	297849312	54.78	Mascot (A5)			Mascot (A5)	cot (A5)	ot (A5)	ot (A5)	0.21
		FALSE	High	Mascot (A5)	Unambiguous	[K].WELLQQVDTSTR.[T]		1	1	P04264	P04264	0	2	0.7736	0	1	1	738.375	1475.74	1475.75	-3.5	-0.00258	HCD (High Energy Collision Dissociation)	MS2	22.3177	30	56.0059	39153	01082019_Fusion_MASSFIITB_307198_S3.raw	F3			53	FALSE	53	35	0.000108712	0	0.0001102			Mascot (A5)			Mascot (A5)	cot (A5)	ot (A5)	ot (A5)	-3.5
		FALSE	High	Mascot (A5)	Unambiguous	[K].WELLQQVDTSTR.[T]		1	1	P04264	P04264	0	2	0.8889	0	1	1	738.376	1475.74	1475.75	-3.35	-0.00247	HCD (High Energy Collision Dissociation)	MS2	17.8123	30	54.2465	34918	01082019_Fusion_MASSFIITB_307198_S6.raw	F6			72	FALSE	53	35	1.25973e-06	0	0.0001482	9914602	54.31	Mascot (A5)			Mascot (A5)	cot (A5)	ot (A5)	ot (A5)	-3.35
		FALSE	High	Mascot (A5)	Unambiguous	[K].WELLQQVDTSTR.[T]		1	1	P04264	P04264	0	2	0.7377	0	1	1	738.377	1475.75	1475.75	-1.89	-0.0014	HCD (High Energy Collision Dissociation)	MS2	17.8417	15.548	54.3772	37698	01082019_Fusion_MASSFIITB_307198_S3.raw	F3			61	FALSE	53	35	1.65763e-05	0	0.0001528	904893440	54.76	Mascot (A5)			Mascot (A5)	cot (A5)	ot (A5)	ot (A5)	-1.89
		FALSE	High	Mascot (A5)	Unambiguous	[K].WELLQQVDTSTR.[T]		1	1	P04264	P04264	0	2	0.963	0	1	1	738.379	1475.75	1475.75	1.82	0.00134	HCD (High Energy Collision Dissociation)	MS2	57.9644	30	56.5649	39221	01082019_Fusion_MASSFIITB_307198_S4.raw	F4			54	FALSE	53	35	9.84661e-05	0	0.0001736			Mascot (A5)			Mascot (A5)	cot (A5)	ot (A5)	ot (A5)	1.82
		FALSE	High	Mascot (A5)	Unambiguous	[K].WELLQQVDTSTR.[T]		1	1	P04264	P04264	0	2	0.8846	0	1	1	738.376	1475.75	1475.75	-2.6	-0.00192	HCD (High Energy Collision Dissociation)	MS2	18.4311	23.5	54.2518	37230	01082019_Fusion_MASSFIITB_307198_S1.raw	F1			78	FALSE	53	35	3.67465e-07	0	0.0002078	420410496	54.68	Mascot (A5)			Mascot (A5)	cot (A5)	ot (A5)	ot (A5)	-2.6
		FALSE	High	Sequest HT (A2)	Unambiguous	[K].WELLQQVDTSTR.[T]		1	1	P04264	P04264	0	2	0.6111	0	1	1	738.379	1475.75	1475.75	1.82	0.00134	HCD (High Energy Collision Dissociation)	MS2	57.9644	30	56.5649	39221	01082019_Fusion_MASSFIITB_307198_S4.raw	F4		2.52		FALSE				0	0.0002389			Sequest HT (A2)			Sequest HT (A2	uest HT	est HT	est HT	1.82
		FALSE	High	Mascot (A5)	Unambiguous	[K].WELLQQVDTSTR.[T]		1	1	P04264	P04264	0	2	0.8481	0	1	1	738.377	1475.75	1475.75	-1.9	-0.0014	HCD (High Energy Collision Dissociation)	MS2	16.2487	23.5	54.3145	37234	01082019_Fusion_MASSFIITB_307198_S4.raw	F4			79	FALSE	53	35	2.80213e-07	0	0.0002428	58346100	54.33	Mascot (A5)			Mascot (A5)	cot (A5)	ot (A5)	ot (A5)	-1.9
		FALSE	High	Sequest HT (A2)	Unambiguous	[K].WELLQQVDTSTR.[T]		1	1	P04264	P04264	0	2	0.5878	0	1	1	738.376	1475.75	1475.75	-2.6	-0.00192	HCD (High Energy Collision Dissociation)	MS2	18.4311	23.5	54.2518	37230	01082019_Fusion_MASSFIITB_307198_S1.raw	F1		2.96		FALSE				0	0.0002827	420410496	54.68	Sequest HT (A2)			Sequest HT (A2	uest HT	est HT	est HT	-2.6
		FALSE	High	Mascot (A5)	Selected	[K].WELLQQVDTSTR.[T]		1	1	P04264	P04264	0	2	0.9583	0	1	1	738.379	1475.75	1475.75	1.74	0.00129	HCD (High Energy Collision Dissociation)	MS2	28.4983	7.426	57.4388	40436	01082019_Fusion_MASSFIITB_307198_S3.raw	F3			72	FALSE	53	35	1.3344e-06	0	0.0002903			Mascot (A5)			Mascot (A5)	cot (A5)	ot (A5)	ot (A5)	1.74
		FALSE	High	Sequest HT (A2)	Selected	[K].WELLQQVDTSTR.[T]		1	1	P04264	P04264	0	2	0.5214	0	1	1	738.378	1475.75	1475.75	0	0	HCD (High Energy Collision Dissociation)	MS2	29.9845	23.5	54.5895	37477	01082019_Fusion_MASSFIITB_307198_S4.raw	F4		2.57		FALSE				0	0.0003737	1849856512	54.76	Sequest HT (A2)			Sequest HT (A2	uest HT	est HT	est HT	0
		FALSE	High	Mascot (A5)	Selected	[K].WELLQQVDTSTR.[T]		1	1	P04264	P04264	0	2	0.9194	0	1	1	738.378	1475.75	1475.75	-0.29	-0.00021	HCD (High Energy Collision Dissociation)	MS2	27.8676	30	54.2011	35483	01082019_Fusion_MASSFIITB_307198_S8.raw	F8			62	FALSE	53	35	1.50104e-05	0	0.0006791	3.31077e+06	54.27	Mascot (A5)			Mascot (A5)	cot (A5)	ot (A5)	ot (A5)	-0.29
		FALSE	High	Sequest HT (A2)	Selected	[K].WELLQQVDTSTR.[T]		1	1	P04264	P04264	0	2	0.4303	0	1	1	738.378	1475.75	1475.75	0.01	0	HCD (High Energy Collision Dissociation)	MS2	19.0861	23.5	54.8876	38156	01082019_Fusion_MASSFIITB_307198_S3.raw	F3		2.51		FALSE				0	0.00375	904893440	54.76	Sequest HT (A2)			Sequest HT (A2	uest HT	est HT	est HT	0.01
		FALSE	High	Sequest HT (A2)	Selected	[K].WELLQQVDTSTR.[T]		1	1	P04264	P04264	0	2	0.5122	0	1	1	738.378	1475.75	1475.75	-0.52	-0.00039	HCD (High Energy Collision Dissociation)	MS2	34.0507	8.772	54.7354	37568	01082019_Fusion_MASSFIITB_307198_S2.raw	F2		2.46		FALSE				0.004618	0.07936	931213056	54.75	Sequest HT (A2)			Sequest HT (A2	uest HT	est HT	est HT	-0.52
	FALSE	High	[R].THNLEPYFESFINNLR.[R]			FALSE	1	1	9	P04264	P04264 [224-239]	0	1993.98	0	272.8	182.7	44.4	280.8	33.2	65.9	4.2	16			High	High	Peak Found	High	High	Peak Found	Peak Found	Peak Found	Not Found	High	High	0	0	3.387e-06	1.155e-08	5.9	72		R.THNLEPYFESFINNLR.R	[224-239]					4.2
		Checked	Confidence	Identifying Node	PSM Ambiguity	Annotated Sequence	Modifications	# Protein Groups	# Proteins	Master Protein Accessions	Protein Accessions	# Missed Cleavages	Charge	DeltaScore	DeltaCn	Rank	Search Engine Rank	m/z [Da]	MH+ [Da]	Theo. MH+ [Da]	DeltaM [ppm]	Deltam/z [Da]	Activation Type	MS Order	Isolation Interference [%]	Ion Inject Time [ms]	RT [min]	First Scan	Spectrum File	File ID	Quan Info	XCorr	Ions Score	Contaminant	Identity Strict	Identity Relaxed	Expectation Value	Percolator q-Value	Percolator PEP	Precursor Abundance	Apex RT [min]	Identifying Node			Identifying No	ntifying	tifying	tifying	DeltaM [ppm]
		FALSE	High	Sequest HT (A2)	Unambiguous	[R].THNLEPYFESFINNLR.[R]		1	1	P04264	P04264	0	3	0.6881	0	1	1	665.33	1993.98	1993.98	-0.19	-0.00012	HCD (High Energy Collision Dissociation)	MS2	0	22.785	66.7857	48310	01082019_Fusion_MASSFIITB_307198_S4.raw	F4		5.9		FALSE				0	1.155e-08	205581312	66.97	Sequest HT (A2)			Sequest HT (A2	uest HT	est HT	est HT	-0.19
		FALSE	High	Sequest HT (A2)	Unambiguous	[R].THNLEPYFESFINNLR.[R]		1	1	P04264	P04264	0	3	0.725	0	1	1	665.33	1993.98	1993.98	0.08	5e-05	HCD (High Energy Collision Dissociation)	MS2	0	30	66.7877	48511	01082019_Fusion_MASSFIITB_307198_S2.raw	F2		4.8		FALSE				0	3.031e-08	93631200	66.95	Sequest HT (A2)			Sequest HT (A2	uest HT	est HT	est HT	0.08
		FALSE	High	Sequest HT (A2)	Unambiguous	[R].THNLEPYFESFINNLR.[R]		1	1	P04264	P04264	0	3	0.7052	0	1	1	665.33	1993.98	1993.98	0.13	8e-05	HCD (High Energy Collision Dissociation)	MS2	0	16.786	66.7793	48440	01082019_Fusion_MASSFIITB_307198_S1.raw	F1		5.02		FALSE				0	3.981e-07	54294056	66.83	Sequest HT (A2)			Sequest HT (A2	uest HT	est HT	est HT	0.13
		FALSE	High	Sequest HT (A2)	Unambiguous	[R].THNLEPYFESFINNLR.[R]		1	1	P04264	P04264	0	3	0.7475	0	1	1	665.331	1993.98	1993.98	0.28	0.00019	HCD (High Energy Collision Dissociation)	MS2	0	30	66.8724	48151	01082019_Fusion_MASSFIITB_307198_S5.raw	F5		3.96		FALSE				0	8.498e-07	17483412	66.98	Sequest HT (A2)			Sequest HT (A2	uest HT	est HT	est HT	0.28
		FALSE	High	Mascot (A5)	Unambiguous	[R].THNLEPYFESFINNLR.[R]		1	1	P04264	P04264	0	3	1	0	1	1	665.33	1993.98	1993.98	0.13	8e-05	HCD (High Energy Collision Dissociation)	MS2	0	16.786	66.7793	48440	01082019_Fusion_MASSFIITB_307198_S1.raw	F1			70	FALSE	54	36	2.51455e-06	0	1.229e-06	54294056	66.83	Mascot (A5)			Mascot (A5)	cot (A5)	ot (A5)	ot (A5)	0.13
		FALSE	High	Mascot (A5)	Unambiguous	[R].THNLEPYFESFINNLR.[R]		1	1	P04264	P04264	0	3	1	0	1	1	665.33	1993.98	1993.98	0.08	5e-05	HCD (High Energy Collision Dissociation)	MS2	0	30	66.7877	48511	01082019_Fusion_MASSFIITB_307198_S2.raw	F2			72	FALSE	54	36	1.64049e-06	0	2.279e-06	93631200	66.95	Mascot (A5)			Mascot (A5)	cot (A5)	ot (A5)	ot (A5)	0.08
		FALSE	High	Mascot (A5)	Unambiguous	[R].THNLEPYFESFINNLR.[R]		1	1	P04264	P04264	0	3	1	0	1	1	665.33	1993.98	1993.98	-0.19	-0.00012	HCD (High Energy Collision Dissociation)	MS2	0	22.785	66.7857	48310	01082019_Fusion_MASSFIITB_307198_S4.raw	F4			72	FALSE	54	36	1.54574e-06	0	3.387e-06	205581312	66.97	Mascot (A5)			Mascot (A5)	cot (A5)	ot (A5)	ot (A5)	-0.19
		FALSE	High	Mascot (A5)	Unambiguous	[R].THNLEPYFESFINNLR.[R]		1	1	P04264	P04264	0	3	1	0	1	1	665.331	1993.98	1993.98	0.28	0.00019	HCD (High Energy Collision Dissociation)	MS2	0	30	66.8724	48151	01082019_Fusion_MASSFIITB_307198_S5.raw	F5			69	FALSE	54	36	3.2707e-06	0	5.711e-06	17483412	66.98	Mascot (A5)			Mascot (A5)	cot (A5)	ot (A5)	ot (A5)	0.28
		FALSE	High	Sequest HT (A2)	Selected	[R].THNLEPYFESFINNLR.[R]		1	1	P04264	P04264	0	2	0.7935	0	1	1	997.492	1993.98	1993.98	0.15	0.00015	HCD (High Energy Collision Dissociation)	MS2	6.5814	30	66.9847	48498	01082019_Fusion_MASSFIITB_307198_S4.raw	F4		3.1		FALSE				0	1.592e-05	37702748	66.97	Sequest HT (A2)			Sequest HT (A2	uest HT	est HT	est HT	0.15
	FALSE	High	[R].THNLEPYFESFINNLRR.[R]			FALSE	1	1	1	P04264	P04264 [224-240]	1	2150.08	0		229.3	15.1	655.5							Not Found	Peak Found	Peak Found	High	Not Found	Not Found	Not Found	Not Found	Not Found	High	High	0	0	0.0002141	3.022e-05	2.98	34		R.THNLEPYFESFINNLRR.R	[224-240]
		Checked	Confidence	Identifying Node	PSM Ambiguity	Annotated Sequence	Modifications	# Protein Groups	# Proteins	Master Protein Accessions	Protein Accessions	# Missed Cleavages	Charge	DeltaScore	DeltaCn	Rank	Search Engine Rank	m/z [Da]	MH+ [Da]	Theo. MH+ [Da]	DeltaM [ppm]	Deltam/z [Da]	Activation Type	MS Order	Isolation Interference [%]	Ion Inject Time [ms]	RT [min]	First Scan	Spectrum File	File ID	Quan Info	XCorr	Ions Score	Contaminant	Identity Strict	Identity Relaxed	Expectation Value	Percolator q-Value	Percolator PEP	Precursor Abundance	Apex RT [min]	Identifying Node			Identifying No	ntifying	tifying	tifying	DeltaM [ppm]
		FALSE	High	Sequest HT (A2)	Selected	[R].THNLEPYFESFINNLRR.[R]		1	1	P04264	P04264	1	4	0.6242	0	1	1	538.275	2150.08	2150.08	0.85	0.00046	HCD (High Energy Collision Dissociation)	MS2	24.6986	30	63.7915	45560	01082019_Fusion_MASSFIITB_307198_S4.raw	F4		2.98		FALSE				0	3.022e-05	21801160	63.91	Sequest HT (A2)			Sequest HT (A2	uest HT	est HT	est HT	0.85
	FALSE	High	[R].TLLEGEESR.[M]			FALSE	1	1	6	P04264	P04264 [484-492]	0	1033.52	0	102.8	99.2	118.6	118.1	76.1	109.7	144.6	111.9	18.9		Peak Found	Peak Found	High	High	High	Peak Found	High	High	Peak Found	High	High	0	0	0.01488	0.005223	2.7	37		R.TLLEGEESR.M	[484-492]					144.6
		Checked	Confidence	Identifying Node	PSM Ambiguity	Annotated Sequence	Modifications	# Protein Groups	# Proteins	Master Protein Accessions	Protein Accessions	# Missed Cleavages	Charge	DeltaScore	DeltaCn	Rank	Search Engine Rank	m/z [Da]	MH+ [Da]	Theo. MH+ [Da]	DeltaM [ppm]	Deltam/z [Da]	Activation Type	MS Order	Isolation Interference [%]	Ion Inject Time [ms]	RT [min]	First Scan	Spectrum File	File ID	Quan Info	XCorr	Ions Score	Contaminant	Identity Strict	Identity Relaxed	Expectation Value	Percolator q-Value	Percolator PEP	Precursor Abundance	Apex RT [min]	Identifying Node			Identifying No	ntifying	tifying	tifying	DeltaM [ppm]
		FALSE	High	Sequest HT (A2)	Selected	[R].TLLEGEESR.[M]		1	1	P04264	P04264	0	2	0.6709	0	1	1	517.262	1033.52	1033.52	-0.28	-0.00014	HCD (High Energy Collision Dissociation)	MS2	6.0903	30.463	28.6051	13057	01082019_Fusion_MASSFIITB_307198_S7.raw	F7		2.34		FALSE				0	0.002254	198272624	28.74	Sequest HT (A2)			Sequest HT (A2	uest HT	est HT	est HT	-0.28
		FALSE	High	Sequest HT (A2)	Selected	[R].TLLEGEESR.[M]		1	1	P04264	P04264	0	2	0.6079	0	1	1	517.262	1033.52	1033.52	0.55	0.00029	HCD (High Energy Collision Dissociation)	MS2	4.61912	19.99	29.2606	15943	01082019_Fusion_MASSFIITB_307198_S3.raw	F3		2.27		FALSE				0	0.003539	2611906048	28.8	Sequest HT (A2)			Sequest HT (A2	uest HT	est HT	est HT	0.55
		FALSE	High	Sequest HT (A2)	Selected	[R].TLLEGEESR.[M]		1	1	P04264	P04264	0	2	0.6593	0	1	1	517.262	1033.52	1033.52	0.19	0.0001	HCD (High Energy Collision Dissociation)	MS2	8.36062	21.057	29.3065	15780	01082019_Fusion_MASSFIITB_307198_S4.raw	F4		2.7		FALSE				0	0.005223	97146080	29.39	Sequest HT (A2)			Sequest HT (A2	uest HT	est HT	est HT	0.19
		FALSE	High	Sequest HT (A2)	Selected	[R].TLLEGEESR.[M]		1	1	P04264	P04264	0	2	0.6565	0	1	1	517.262	1033.52	1033.52	-0.17	-9e-05	HCD (High Energy Collision Dissociation)	MS2	6.63619	2.394	28.64	15217	01082019_Fusion_MASSFIITB_307198_S4.raw	F4		2.3		FALSE				0	0.01053	3173519616	28.77	Sequest HT (A2)			Sequest HT (A2	uest HT	est HT	est HT	-0.17
		FALSE	High	Sequest HT (A2)	Selected	[R].TLLEGEESR.[M]		1	1	P04264	P04264	0	2	0.6267	0	1	1	517.262	1033.52	1033.52	-0.23	-0.00012	HCD (High Energy Collision Dissociation)	MS2	11.9151	8.49	28.6511	14414	01082019_Fusion_MASSFIITB_307198_S8.raw	F8		2.25		FALSE				0.0004992	0.02205	410451328	28.75	Sequest HT (A2)			Sequest HT (A2	uest HT	est HT	est HT	-0.23
		FALSE	High	Sequest HT (A2)	Selected	[R].TLLEGEESR.[M]		1	1	P04264	P04264	0	2	0.65	0	1	1	517.261	1033.52	1033.52	-0.32	-0.00017	HCD (High Energy Collision Dissociation)	MS2	7.99522	2.384	28.7603	15116	01082019_Fusion_MASSFIITB_307198_S5.raw	F5		2.4		FALSE				0.001757	0.03728	1279467648	28.85	Sequest HT (A2)			Sequest HT (A2	uest HT	est HT	est HT	-0.32
	FALSE	High	[R].TNAENEFVTIK.[K]			FALSE	1	1	15	P04264	P04264 [278-288]	0	1265.64	0	98.9	70	91.4	80.2	98	118.7	128.7	118.2	95.9		High	High	High	High	High	High	Peak Found	High	Peak Found	High	High	0	0	0.001403	4.759e-05	3.16	40		R.TNAENEFVTIK.K	[278-288]					128.7
		Checked	Confidence	Identifying Node	PSM Ambiguity	Annotated Sequence	Modifications	# Protein Groups	# Proteins	Master Protein Accessions	Protein Accessions	# Missed Cleavages	Charge	DeltaScore	DeltaCn	Rank	Search Engine Rank	m/z [Da]	MH+ [Da]	Theo. MH+ [Da]	DeltaM [ppm]	Deltam/z [Da]	Activation Type	MS Order	Isolation Interference [%]	Ion Inject Time [ms]	RT [min]	First Scan	Spectrum File	File ID	Quan Info	XCorr	Ions Score	Contaminant	Identity Strict	Identity Relaxed	Expectation Value	Percolator q-Value	Percolator PEP	Precursor Abundance	Apex RT [min]	Identifying Node			Identifying No	ntifying	tifying	tifying	DeltaM [ppm]
		FALSE	High	Sequest HT (A2)	Unambiguous	[R].TNAENEFVTIK.[K]		1	1	P04264	P04264	0	2	0.6054	0	1	1	633.322	1265.64	1265.64	0.28	0.00018	HCD (High Energy Collision Dissociation)	MS2	0	9.594	40.0773	24472	01082019_Fusion_MASSFIITB_307198_S5.raw	F5		2.61		FALSE				0	2.579e-05	633101056	40.29	Sequest HT (A2)			Sequest HT (A2	uest HT	est HT	est HT	0.28
		FALSE	High	Mascot (A5)	Unambiguous	[R].TNAENEFVTIK.[K]		1	1	P04264	P04264	0	2	0.8941	0	1	1	633.322	1265.64	1265.64	0.28	0.00018	HCD (High Energy Collision Dissociation)	MS2	0	9.594	40.0773	24472	01082019_Fusion_MASSFIITB_307198_S5.raw	F5			85	FALSE	53	36	7.38882e-08	0	4.645e-05	633101056	40.29	Mascot (A5)			Mascot (A5)	cot (A5)	ot (A5)	ot (A5)	0.28
		FALSE	High	Sequest HT (A2)	Unambiguous	[R].TNAENEFVTIK.[K]		1	1	P04264	P04264	0	2	0.5886	0	1	1	633.322	1265.64	1265.64	-0.08	-5e-05	HCD (High Energy Collision Dissociation)	MS2	0	13.466	40.1288	24846	01082019_Fusion_MASSFIITB_307198_S4.raw	F4		3.16		FALSE				0	4.759e-05	855421824	40.29	Sequest HT (A2)			Sequest HT (A2	uest HT	est HT	est HT	-0.08
		FALSE	High	Sequest HT (A2)	Unambiguous	[R].TNAENEFVTIK.[K]		1	1	P04264	P04264	0	2	0.5662	0	1	1	633.323	1265.64	1265.64	0.43	0.00028	HCD (High Energy Collision Dissociation)	MS2	5.62147	30	40.06	24419	01082019_Fusion_MASSFIITB_307198_S2.raw	F2		3.02		FALSE				0	6.485e-05	555795904	40.26	Sequest HT (A2)			Sequest HT (A2	uest HT	est HT	est HT	0.43
		FALSE	High	Sequest HT (A2)	Selected	[R].TNAENEFVTIK.[K]		1	1	P04264	P04264	0	2	0.6235	0	1	1	633.322	1265.64	1265.64	-0.56	-0.00036	HCD (High Energy Collision Dissociation)	MS2	3.90814	17.672	40.7713	25615	01082019_Fusion_MASSFIITB_307198_S3.raw	F3		2.55		FALSE				0	7.611e-05	32333584	40.79	Sequest HT (A2)			Sequest HT (A2	uest HT	est HT	est HT	-0.56
		FALSE	High	Mascot (A5)	Unambiguous	[R].TNAENEFVTIK.[K]		1	1	P04264	P04264	0	2	0.8831	0	1	1	633.321	1265.64	1265.64	-1.47	-0.00093	HCD (High Energy Collision Dissociation)	MS2	14.6961	24.33	40.1189	23450	01082019_Fusion_MASSFIITB_307198_S8.raw	F8			77	FALSE	54	36	5.21168e-07	0	9.739e-05	163613152	40.29	Mascot (A5)			Mascot (A5)	cot (A5)	ot (A5)	ot (A5)	-1.47
		FALSE	High	Sequest HT (A2)	Unambiguous	[R].TNAENEFVTIK.[K]		1	1	P04264	P04264	0	2	0.573	0	1	1	633.321	1265.64	1265.64	-1.47	-0.00093	HCD (High Energy Collision Dissociation)	MS2	14.6961	24.33	40.1189	23450	01082019_Fusion_MASSFIITB_307198_S8.raw	F8		2.67		FALSE				0	0.0001503	163613152	40.29	Sequest HT (A2)			Sequest HT (A2	uest HT	est HT	est HT	-1.47
		FALSE	High	Mascot (A5)	Unambiguous	[R].TNAENEFVTIK.[K]		1	1	P04264	P04264	0	2	0.8182	0	1	1	633.322	1265.64	1265.64	-0.08	-5e-05	HCD (High Energy Collision Dissociation)	MS2	0	13.466	40.1288	24846	01082019_Fusion_MASSFIITB_307198_S4.raw	F4			77	FALSE	53	36	4.87456e-07	0	0.0001518	855421824	40.29	Mascot (A5)			Mascot (A5)	cot (A5)	ot (A5)	ot (A5)	-0.08
		FALSE	High	Sequest HT (A2)	Unambiguous	[R].TNAENEFVTIK.[K]		1	1	P04264	P04264	0	2	0.5854	0	1	1	633.322	1265.64	1265.64	-0.14	-9e-05	HCD (High Energy Collision Dissociation)	MS2	11.6112	30	40.1206	22675	01082019_Fusion_MASSFIITB_307198_S6.raw	F6		2.87		FALSE				0	0.0003745	260242800	40.31	Sequest HT (A2)			Sequest HT (A2	uest HT	est HT	est HT	-0.14
		FALSE	High	Mascot (A5)	Unambiguous	[R].TNAENEFVTIK.[K]		1	1	P04264	P04264	0	2	0.7403	0	1	1	633.323	1265.64	1265.64	0.43	0.00028	HCD (High Energy Collision Dissociation)	MS2	5.62147	30	40.06	24419	01082019_Fusion_MASSFIITB_307198_S2.raw	F2			77	FALSE	53	36	4.79264e-07	0	0.0003854	555795904	40.26	Mascot (A5)			Mascot (A5)	cot (A5)	ot (A5)	ot (A5)	0.43
		FALSE	High	Mascot (A5)	Unambiguous	[R].TNAENEFVTIK.[K]		1	1	P04264	P04264	0	2	0.8831	0	1	1	633.322	1265.64	1265.64	-0.14	-9e-05	HCD (High Energy Collision Dissociation)	MS2	11.6112	30	40.1206	22675	01082019_Fusion_MASSFIITB_307198_S6.raw	F6			77	FALSE	53	36	5.23522e-07	0	0.0004709	260242800	40.31	Mascot (A5)			Mascot (A5)	cot (A5)	ot (A5)	ot (A5)	-0.14
		FALSE	High	Sequest HT (A2)	Selected	[R].TNAENEFVTIK.[K]		1	1	P04264	P04264	0	2	0.4915	0	1	1	633.321	1265.63	1265.64	-2.57	-0.00163	HCD (High Energy Collision Dissociation)	MS2	24.6598	23.5	40.8282	25083	01082019_Fusion_MASSFIITB_307198_S2.raw	F2		2.34		FALSE				0	0.002853	555795904	40.26	Sequest HT (A2)			Sequest HT (A2	uest HT	est HT	est HT	-2.57
		FALSE	High	Sequest HT (A2)	Selected	[R].TNAENEFVTIK.[K]		1	1	P04264	P04264	0	2	0.627	0	1	1	633.322	1265.64	1265.64	0.19	0.00012	HCD (High Energy Collision Dissociation)	MS2	61.2017	23.5	40.0759	24502	01082019_Fusion_MASSFIITB_307198_S1.raw	F1		2.52		FALSE				0	0.01226	285196128	40.27	Sequest HT (A2)			Sequest HT (A2	uest HT	est HT	est HT	0.19
		FALSE	High	Sequest HT (A2)	Selected	[R].TNAENEFVTIK.[K]		1	1	P04264	P04264	0	2	0.4091	0	1	1	633.321	1265.64	1265.64	-1.18	-0.00075	HCD (High Energy Collision Dissociation)	MS2	21.9929	23.5	43.351	27292	01082019_Fusion_MASSFIITB_307198_S2.raw	F2		2.42		FALSE				0.0002645	0.01652			Sequest HT (A2)			Sequest HT (A2	uest HT	est HT	est HT	-1.18
		FALSE	High	Sequest HT (A2)	Selected	[R].TNAENEFVTIK.[K]		1	1	P04264	P04264	0	2	0.4152	0	1	1	633.322	1265.64	1265.64	-0.96	-0.00061	HCD (High Energy Collision Dissociation)	MS2	70.1184	23.5	40.7642	25034	01082019_Fusion_MASSFIITB_307198_S5.raw	F5		2.24		FALSE				0.006936	0.08995	633101056	40.29	Sequest HT (A2)			Sequest HT (A2	uest HT	est HT	est HT	-0.96
	FALSE	High	[R].TNAENEFVTIKK.[D]			FALSE	1	1	30	P04264	P04264 [278-289]	1	1393.73	0	90.8	127.3	120.1	107.9	110.1	106.8	114.7	122.3			High	High	High	High	High	High	High	High	Not Found	High	High	0	0	0.001276	9.198e-06	4.62	60		R.TNAENEFVTIKK.D	[278-289]					114.7
		Checked	Confidence	Identifying Node	PSM Ambiguity	Annotated Sequence	Modifications	# Protein Groups	# Proteins	Master Protein Accessions	Protein Accessions	# Missed Cleavages	Charge	DeltaScore	DeltaCn	Rank	Search Engine Rank	m/z [Da]	MH+ [Da]	Theo. MH+ [Da]	DeltaM [ppm]	Deltam/z [Da]	Activation Type	MS Order	Isolation Interference [%]	Ion Inject Time [ms]	RT [min]	First Scan	Spectrum File	File ID	Quan Info	XCorr	Ions Score	Contaminant	Identity Strict	Identity Relaxed	Expectation Value	Percolator q-Value	Percolator PEP	Precursor Abundance	Apex RT [min]	Identifying Node			Identifying No	ntifying	tifying	tifying	DeltaM [ppm]
		FALSE	High	Sequest HT (A2)	Unambiguous	[R].TNAENEFVTIKK.[D]		1	1	P04264	P04264	1	3	0.7096	0	1	1	465.249	1393.73	1393.73	-0.3	-0.00014	HCD (High Energy Collision Dissociation)	MS2	11.2498	10.603	30.9235	14731	01082019_Fusion_MASSFIITB_307198_S7.raw	F7		3.96		FALSE				0	9.151e-06	96536552	30.94	Sequest HT (A2)			Sequest HT (A2	uest HT	est HT	est HT	-0.3
		FALSE	High	Sequest HT (A2)	Unambiguous	[R].TNAENEFVTIKK.[D]		1	1	P04264	P04264	1	3	0.7619	0	1	1	465.249	1393.73	1393.73	0.44	0.00021	HCD (High Energy Collision Dissociation)	MS2	22.5368	2.423	30.8355	16667	01082019_Fusion_MASSFIITB_307198_S1.raw	F1		4.62		FALSE				0	9.198e-06	385570560	30.88	Sequest HT (A2)			Sequest HT (A2	uest HT	est HT	est HT	0.44
		FALSE	High	Sequest HT (A2)	Unambiguous	[R].TNAENEFVTIKK.[D]		1	1	P04264	P04264	1	3	0.7582	0	1	1	465.249	1393.73	1393.73	0.01	1e-05	HCD (High Energy Collision Dissociation)	MS2	9.20121	2.897	30.8897	16149	01082019_Fusion_MASSFIITB_307198_S8.raw	F8		4.26		FALSE				0	1.935e-05	255107200	30.89	Sequest HT (A2)			Sequest HT (A2	uest HT	est HT	est HT	0.01
		FALSE	High	Sequest HT (A2)	Unambiguous	[R].TNAENEFVTIKK.[D]		1	1	P04264	P04264	1	2	0.6903	0	1	1	697.37	1393.73	1393.73	-0.22	-0.00016	HCD (High Energy Collision Dissociation)	MS2	2.86069	30	30.9871	14780	01082019_Fusion_MASSFIITB_307198_S7.raw	F7		2.68		FALSE				0	2.053e-05	19284494	30.94	Sequest HT (A2)			Sequest HT (A2	uest HT	est HT	est HT	-0.22
		FALSE	High	Sequest HT (A2)	Unambiguous	[R].TNAENEFVTIKK.[D]		1	1	P04264	P04264	1	2	0.7175	0	1	1	697.37	1393.73	1393.73	1.04	0.00073	HCD (High Energy Collision Dissociation)	MS2	2.28049	14.395	30.8862	15324	01082019_Fusion_MASSFIITB_307198_S6.raw	F6		3.08		FALSE				0	2.474e-05	97831768	30.85	Sequest HT (A2)			Sequest HT (A2	uest HT	est HT	est HT	1.04
		FALSE	High	Sequest HT (A2)	Unambiguous	[R].TNAENEFVTIKK.[D]		1	1	P04264	P04264	1	3	0.7457	0	1	1	465.249	1393.73	1393.73	0.57	0.00027	HCD (High Energy Collision Dissociation)	MS2	18.1533	2.032	30.8451	15291	01082019_Fusion_MASSFIITB_307198_S6.raw	F6		4.6		FALSE				0	3.995e-05	328982464	30.85	Sequest HT (A2)			Sequest HT (A2	uest HT	est HT	est HT	0.57
		FALSE	High	Sequest HT (A2)	Unambiguous	[R].TNAENEFVTIKK.[D]		1	1	P04264	P04264	1	3	0.732	0	1	1	465.249	1393.73	1393.73	-0.57	-0.00027	HCD (High Energy Collision Dissociation)	MS2	26.9712	0.439	30.799	16612	01082019_Fusion_MASSFIITB_307198_S2.raw	F2		4.03		FALSE				0	5.134e-05	1392564480	30.79	Sequest HT (A2)			Sequest HT (A2	uest HT	est HT	est HT	-0.57
		FALSE	High	Sequest HT (A2)	Unambiguous	[R].TNAENEFVTIKK.[D]		1	1	P04264	P04264	1	2	0.694	0	1	1	697.37	1393.73	1393.73	-0.05	-4e-05	HCD (High Energy Collision Dissociation)	MS2	5.34886	7.203	30.9192	16739	01082019_Fusion_MASSFIITB_307198_S1.raw	F1		2.68		FALSE				0	5.814e-05	93478032	30.87	Sequest HT (A2)			Sequest HT (A2	uest HT	est HT	est HT	-0.05
		FALSE	High	Sequest HT (A2)	Unambiguous	[R].TNAENEFVTIKK.[D]		1	1	P04264	P04264	1	3	0.7177	0	1	1	465.249	1393.73	1393.73	-0.63	-0.00029	HCD (High Energy Collision Dissociation)	MS2	15.8138	0.629	30.8439	17314	01082019_Fusion_MASSFIITB_307198_S3.raw	F3		3.79		FALSE				0	6.22e-05	1281156864	30.83	Sequest HT (A2)			Sequest HT (A2	uest HT	est HT	est HT	-0.63
		FALSE	High	Sequest HT (A2)	Unambiguous	[R].TNAENEFVTIKK.[D]		1	1	P04264	P04264	1	3	0.7234	0	1	1	465.249	1393.73	1393.73	-0.3	-0.00014	HCD (High Energy Collision Dissociation)	MS2	23.9659	0.647	30.8901	17084	01082019_Fusion_MASSFIITB_307198_S4.raw	F4		4.23		FALSE				0	7.115e-05	1507339648	30.95	Sequest HT (A2)			Sequest HT (A2	uest HT	est HT	est HT	-0.3
		FALSE	High	Mascot (A5)	Unambiguous	[R].TNAENEFVTIKK.[D]		1	1	P04264	P04264	1	3	1	0	1	1	465.249	1393.73	1393.73	-0.3	-0.00014	HCD (High Energy Collision Dissociation)	MS2	11.2498	10.603	30.9235	14731	01082019_Fusion_MASSFIITB_307198_S7.raw	F7			78	FALSE	53	35	3.99588e-07	0	7.579e-05	96536552	30.94	Mascot (A5)			Mascot (A5)	cot (A5)	ot (A5)	ot (A5)	-0.3
		FALSE	High	Mascot (A5)	Unambiguous	[R].TNAENEFVTIKK.[D]		1	1	P04264	P04264	1	2	1	0	1	1	697.37	1393.73	1393.73	-0.05	-4e-05	HCD (High Energy Collision Dissociation)	MS2	5.34886	7.203	30.9192	16739	01082019_Fusion_MASSFIITB_307198_S1.raw	F1			92	FALSE	53	35	1.31708e-08	0	9.344e-05	93478032	30.87	Mascot (A5)			Mascot (A5)	cot (A5)	ot (A5)	ot (A5)	-0.05
		FALSE	High	Mascot (A5)	Unambiguous	[R].TNAENEFVTIKK.[D]		1	1	P04264	P04264	1	2	0.9881	0	1	1	697.369	1393.73	1393.73	-0.57	-0.0004	HCD (High Energy Collision Dissociation)	MS2	0.557327	1.918	30.8992	17092	01082019_Fusion_MASSFIITB_307198_S4.raw	F4			84	FALSE	53	36	9.81907e-08	0	0.0001036	582797952	30.95	Mascot (A5)			Mascot (A5)	cot (A5)	ot (A5)	ot (A5)	-0.57
		FALSE	High	Mascot (A5)	Unambiguous	[R].TNAENEFVTIKK.[D]		1	1	P04264	P04264	1	3	1	0	1	1	465.249	1393.73	1393.73	0.44	0.00021	HCD (High Energy Collision Dissociation)	MS2	22.5368	2.423	30.8355	16667	01082019_Fusion_MASSFIITB_307198_S1.raw	F1			59	FALSE	53	35	2.68709e-05	0	0.0001196	385570560	30.88	Mascot (A5)			Mascot (A5)	cot (A5)	ot (A5)	ot (A5)	0.44
		FALSE	High	Sequest HT (A2)	Unambiguous	[R].TNAENEFVTIKK.[D]		1	1	P04264	P04264	1	2	0.7185	0	1	1	697.369	1393.73	1393.73	-0.57	-0.0004	HCD (High Energy Collision Dissociation)	MS2	0.557327	1.918	30.8992	17092	01082019_Fusion_MASSFIITB_307198_S4.raw	F4		3.02		FALSE				0	0.0001354	582797952	30.95	Sequest HT (A2)			Sequest HT (A2	uest HT	est HT	est HT	-0.57
		FALSE	High	Mascot (A5)	Unambiguous	[R].TNAENEFVTIKK.[D]		1	1	P04264	P04264	1	3	1	0	1	1	465.249	1393.73	1393.73	-0.57	-0.00027	HCD (High Energy Collision Dissociation)	MS2	26.9712	0.439	30.799	16612	01082019_Fusion_MASSFIITB_307198_S2.raw	F2			62	FALSE	53	36	1.65604e-05	0	0.0001455	1392564480	30.79	Mascot (A5)			Mascot (A5)	cot (A5)	ot (A5)	ot (A5)	-0.57
		FALSE	High	Mascot (A5)	Unambiguous	[R].TNAENEFVTIKK.[D]		1	1	P04264	P04264	1	2	0.9889	0	1	1	697.37	1393.73	1393.73	-0.22	-0.00016	HCD (High Energy Collision Dissociation)	MS2	2.86069	30	30.9871	14780	01082019_Fusion_MASSFIITB_307198_S7.raw	F7			90	FALSE	53	35	2.18581e-08	0	0.000148	19284494	30.94	Mascot (A5)			Mascot (A5)	cot (A5)	ot (A5)	ot (A5)	-0.22
		FALSE	High	Sequest HT (A2)	Unambiguous	[R].TNAENEFVTIKK.[D]		1	1	P04264	P04264	1	2	0.6864	0	1	1	697.37	1393.73	1393.73	0.12	8e-05	HCD (High Energy Collision Dissociation)	MS2	1.53714	1.832	30.7845	16600	01082019_Fusion_MASSFIITB_307198_S2.raw	F2		2.87		FALSE				0	0.0001773	386306496	30.78	Sequest HT (A2)			Sequest HT (A2	uest HT	est HT	est HT	0.12
		FALSE	High	Sequest HT (A2)	Unambiguous	[R].TNAENEFVTIKK.[D]		1	1	P04264	P04264	1	2	0.7106	0	1	1	697.37	1393.73	1393.73	0.76	0.00053	HCD (High Energy Collision Dissociation)	MS2	0.773696	1.984	30.8875	16863	01082019_Fusion_MASSFIITB_307198_S5.raw	F5		3.11		FALSE				0	0.0001972	387178528	30.88	Sequest HT (A2)			Sequest HT (A2	uest HT	est HT	est HT	0.76
		FALSE	High	Mascot (A5)	Unambiguous	[R].TNAENEFVTIKK.[D]		1	1	P04264	P04264	1	2	0.963	0	1	1	697.37	1393.73	1393.73	1.04	0.00073	HCD (High Energy Collision Dissociation)	MS2	2.28049	14.395	30.8862	15324	01082019_Fusion_MASSFIITB_307198_S6.raw	F6			81	FALSE	53	35	1.8341e-07	0	0.0003347	97831768	30.85	Mascot (A5)			Mascot (A5)	cot (A5)	ot (A5)	ot (A5)	1.04
		FALSE	High	Sequest HT (A2)	Unambiguous	[R].TNAENEFVTIKK.[D]		1	1	P04264	P04264	1	2	0.6899	0	1	1	697.37	1393.73	1393.73	-0.25	-0.00017	HCD (High Energy Collision Dissociation)	MS2	0.37796	1.275	30.8291	17300	01082019_Fusion_MASSFIITB_307198_S3.raw	F3		2.87		FALSE				0	0.0003448	599031296	30.83	Sequest HT (A2)			Sequest HT (A2	uest HT	est HT	est HT	-0.25
		FALSE	High	Mascot (A5)	Unambiguous	[R].TNAENEFVTIKK.[D]		1	1	P04264	P04264	1	3	1	0	1	1	465.249	1393.73	1393.73	0.01	1e-05	HCD (High Energy Collision Dissociation)	MS2	9.20121	2.897	30.8897	16149	01082019_Fusion_MASSFIITB_307198_S8.raw	F8			64	FALSE	53	35	7.91516e-06	0	0.0003467	255107200	30.89	Mascot (A5)			Mascot (A5)	cot (A5)	ot (A5)	ot (A5)	0.01
		FALSE	High	Mascot (A5)	Unambiguous	[R].TNAENEFVTIKK.[D]		1	1	P04264	P04264	1	2	0.9881	0	1	1	697.37	1393.73	1393.73	0.12	8e-05	HCD (High Energy Collision Dissociation)	MS2	1.53714	1.832	30.7845	16600	01082019_Fusion_MASSFIITB_307198_S2.raw	F2			84	FALSE	53	35	8.3441e-08	0	0.000408	386306496	30.78	Mascot (A5)			Mascot (A5)	cot (A5)	ot (A5)	ot (A5)	0.12
		FALSE	High	Mascot (A5)	Unambiguous	[R].TNAENEFVTIKK.[D]		1	1	P04264	P04264	1	2	0.9884	0	1	1	697.37	1393.73	1393.73	-0.25	-0.00017	HCD (High Energy Collision Dissociation)	MS2	0.37796	1.275	30.8291	17300	01082019_Fusion_MASSFIITB_307198_S3.raw	F3			86	FALSE	53	35	5.99255e-08	0	0.0005183	599031296	30.83	Mascot (A5)			Mascot (A5)	cot (A5)	ot (A5)	ot (A5)	-0.25
		FALSE	High	Mascot (A5)	Unambiguous	[R].TNAENEFVTIKK.[D]		1	1	P04264	P04264	1	3	1	0	1	1	465.249	1393.73	1393.73	-0.3	-0.00014	HCD (High Energy Collision Dissociation)	MS2	23.9659	0.647	30.8901	17084	01082019_Fusion_MASSFIITB_307198_S4.raw	F4			60	FALSE	53	35	2.43003e-05	0	0.0006652	1507339648	30.95	Mascot (A5)			Mascot (A5)	cot (A5)	ot (A5)	ot (A5)	-0.3
		FALSE	High	Mascot (A5)	Unambiguous	[R].TNAENEFVTIKK.[D]		1	1	P04264	P04264	1	3	0.9844	0	1	1	465.249	1393.73	1393.73	0.57	0.00027	HCD (High Energy Collision Dissociation)	MS2	18.1533	2.032	30.8451	15291	01082019_Fusion_MASSFIITB_307198_S6.raw	F6			64	FALSE	53	35	8.42131e-06	0	0.000768	328982464	30.85	Mascot (A5)			Mascot (A5)	cot (A5)	ot (A5)	ot (A5)	0.57
		FALSE	High	Mascot (A5)	Unambiguous	[R].TNAENEFVTIKK.[D]		1	1	P04264	P04264	1	2	1	0	1	1	697.37	1393.73	1393.73	0.76	0.00053	HCD (High Energy Collision Dissociation)	MS2	0.773696	1.984	30.8875	16863	01082019_Fusion_MASSFIITB_307198_S5.raw	F5			79	FALSE	53	35	2.69949e-07	0	0.0008708	387178528	30.88	Mascot (A5)			Mascot (A5)	cot (A5)	ot (A5)	ot (A5)	0.76
		FALSE	High	Mascot (A5)	Unambiguous	[R].TNAENEFVTIKK.[D]		1	1	P04264	P04264	1	3	0.95	0	1	1	465.249	1393.73	1393.73	-0.63	-0.00029	HCD (High Energy Collision Dissociation)	MS2	15.8138	0.629	30.8439	17314	01082019_Fusion_MASSFIITB_307198_S3.raw	F3			60	FALSE	53	36	2.559e-05	0	0.001276	1281156864	30.83	Mascot (A5)			Mascot (A5)	cot (A5)	ot (A5)	ot (A5)	-0.63
		FALSE	High	Sequest HT (A2)	Unambiguous	[R].TNAENEFVTIKK.[D]		1	1	P04264	P04264	1	2	0.668	0	1	1	697.37	1393.73	1393.73	-0.26	-0.00018	HCD (High Energy Collision Dissociation)	MS2	4.79516	11.574	30.9917	16220	01082019_Fusion_MASSFIITB_307198_S8.raw	F8		2.56		FALSE				0	0.001692	58711128	30.89	Sequest HT (A2)			Sequest HT (A2	uest HT	est HT	est HT	-0.26
		FALSE	High	Mascot (A5)	Unambiguous	[R].TNAENEFVTIKK.[D]		1	1	P04264	P04264	1	2	0.9853	0	1	1	697.37	1393.73	1393.73	-0.26	-0.00018	HCD (High Energy Collision Dissociation)	MS2	4.79516	11.574	30.9917	16220	01082019_Fusion_MASSFIITB_307198_S8.raw	F8			68	FALSE	53	35	3.85134e-06	0	0.002889	58711128	30.89	Mascot (A5)			Mascot (A5)	cot (A5)	ot (A5)	ot (A5)	-0.26
	FALSE	High	[R].FLEQQNQVLQTKWELLQQVDTSTR.[T]			FALSE	1	1	16	P04264	P04264 [200-223]	1	2932.52	0	127.2	267.6	41.8	310.8	73.5	73.9	5.2				High	High	High	High	Peak Found	High	Peak Found	Not Found	Not Found	High	High	0	0	0.0006388	9.165e-12	5.57	23		R.FLEQQNQVLQTKWELLQQVDTSTR.T	[200-223]					5.2
		Checked	Confidence	Identifying Node	PSM Ambiguity	Annotated Sequence	Modifications	# Protein Groups	# Proteins	Master Protein Accessions	Protein Accessions	# Missed Cleavages	Charge	DeltaScore	DeltaCn	Rank	Search Engine Rank	m/z [Da]	MH+ [Da]	Theo. MH+ [Da]	DeltaM [ppm]	Deltam/z [Da]	Activation Type	MS Order	Isolation Interference [%]	Ion Inject Time [ms]	RT [min]	First Scan	Spectrum File	File ID	Quan Info	XCorr	Ions Score	Contaminant	Identity Strict	Identity Relaxed	Expectation Value	Percolator q-Value	Percolator PEP	Precursor Abundance	Apex RT [min]	Identifying Node			Identifying No	ntifying	tifying	tifying	DeltaM [ppm]
		FALSE	High	Sequest HT (A2)	Unambiguous	[R].FLEQQNQVLQTKWELLQQVDTSTR.[T]		1	1	P04264	P04264	1	3	0.6858	0	1	1	978.177	2932.52	2932.52	0.21	0.0002	HCD (High Energy Collision Dissociation)	MS2	0	6.306	63.4523	45257	01082019_Fusion_MASSFIITB_307198_S4.raw	F4		5.57		FALSE				0	9.165e-12	372410432	63.55	Sequest HT (A2)			Sequest HT (A2	uest HT	est HT	est HT	0.21
		FALSE	High	Sequest HT (A2)	Unambiguous	[R].FLEQQNQVLQTKWELLQQVDTSTR.[T]		1	1	P04264	P04264	1	3	0.6514	0	1	1	978.177	2932.52	2932.52	-0.04	-3e-05	HCD (High Energy Collision Dissociation)	MS2	0.622324	6.312	63.3471	45320	01082019_Fusion_MASSFIITB_307198_S2.raw	F2		5.02		FALSE				0	4.69e-10	231317312	63.42	Sequest HT (A2)			Sequest HT (A2	uest HT	est HT	est HT	-0.04
		FALSE	High	Mascot (A5)	Unambiguous	[R].FLEQQNQVLQTKWELLQQVDTSTR.[T]		1	1	P04264	P04264	1	3	1	0	1	1	978.177	2932.52	2932.52	0.21	0.0002	HCD (High Energy Collision Dissociation)	MS2	0	6.306	63.4523	45257	01082019_Fusion_MASSFIITB_307198_S4.raw	F4			88	FALSE	52	34	3.22559e-08	0	9.503e-10	372410432	63.55	Mascot (A5)			Mascot (A5)	cot (A5)	ot (A5)	ot (A5)	0.21
		FALSE	High	Sequest HT (A2)	Unambiguous	[R].FLEQQNQVLQTKWELLQQVDTSTR.[T]		1	1	P04264	P04264	1	3	0.723	0	1	1	978.177	2932.52	2932.52	0.11	0.00011	HCD (High Energy Collision Dissociation)	MS2	0	30	63.2845	45313	01082019_Fusion_MASSFIITB_307198_S1.raw	F1		4.08		FALSE				0	6.837e-08	42929804	63.43	Sequest HT (A2)			Sequest HT (A2	uest HT	est HT	est HT	0.11
		FALSE	High	Sequest HT (A2)	Unambiguous	[R].FLEQQNQVLQTKWELLQQVDTSTR.[T]		1	1	P04264	P04264	1	3	0.6311	0	1	1	978.177	2932.52	2932.52	0.08	7e-05	HCD (High Energy Collision Dissociation)	MS2	12.1331	30	63.3662	42984	01082019_Fusion_MASSFIITB_307198_S6.raw	F6		3.09		FALSE				0	1.026e-07	19424344	63.48	Sequest HT (A2)			Sequest HT (A2	uest HT	est HT	est HT	0.08
		FALSE	High	Sequest HT (A2)	Unambiguous	[R].FLEQQNQVLQTKWELLQQVDTSTR.[T]		1	1	P04264	P04264	1	3	0.6465	0	1	1	978.178	2932.52	2932.52	0.7	0.00069	HCD (High Energy Collision Dissociation)	MS2	8.49714	28.097	66.1188	48128	01082019_Fusion_MASSFIITB_307198_S3.raw	F3		4.3		FALSE				0	2.054e-07	10278809	65.69	Sequest HT (A2)			Sequest HT (A2	uest HT	est HT	est HT	0.7
		FALSE	High	Mascot (A5)	Unambiguous	[R].FLEQQNQVLQTKWELLQQVDTSTR.[T]		1	1	P04264	P04264	1	3	1	0	1	1	978.177	2932.52	2932.52	-0.04	-3e-05	HCD (High Energy Collision Dissociation)	MS2	0.622324	6.312	63.3471	45320	01082019_Fusion_MASSFIITB_307198_S2.raw	F2			88	FALSE	52	34	3.13639e-08	0	2.48e-07	231317312	63.42	Mascot (A5)			Mascot (A5)	cot (A5)	ot (A5)	ot (A5)	-0.04
		FALSE	High	Sequest HT (A2)	Unambiguous	[R].FLEQQNQVLQTKWELLQQVDTSTR.[T]		1	1	P04264	P04264	1	3	0.5741	0	1	1	978.177	2932.52	2932.52	0.05	5e-05	HCD (High Energy Collision Dissociation)	MS2	3.16544	30	62.7628	44647	01082019_Fusion_MASSFIITB_307198_S4.raw	F4		3.24		FALSE				0	1.269e-06	18788734	62.71	Sequest HT (A2)			Sequest HT (A2	uest HT	est HT	est HT	0.05
		FALSE	High	Mascot (A5)	Unambiguous	[R].FLEQQNQVLQTKWELLQQVDTSTR.[T]		1	1	P04264	P04264	1	3	1	0	1	1	978.177	2932.52	2932.52	0.08	7e-05	HCD (High Energy Collision Dissociation)	MS2	12.1331	30	63.3662	42984	01082019_Fusion_MASSFIITB_307198_S6.raw	F6			84	FALSE	52	34	7.14992e-08	0	1.651e-06	19424344	63.48	Mascot (A5)			Mascot (A5)	cot (A5)	ot (A5)	ot (A5)	0.08
		FALSE	High	Mascot (A5)	Unambiguous	[R].FLEQQNQVLQTKWELLQQVDTSTR.[T]		1	1	P04264	P04264	1	3	0.9851	0	1	1	978.177	2932.52	2932.52	0.11	0.00011	HCD (High Energy Collision Dissociation)	MS2	0	30	63.2845	45313	01082019_Fusion_MASSFIITB_307198_S1.raw	F1			67	FALSE	52	34	3.86368e-06	0	2.236e-06	42929804	63.43	Mascot (A5)			Mascot (A5)	cot (A5)	ot (A5)	ot (A5)	0.11
		FALSE	High	Sequest HT (A2)	Unambiguous	[R].FLEQQNQVLQTKWELLQQVDTSTR.[T]		1	1	P04264	P04264	1	3	0.6463	0	1	1	978.176	2932.51	2932.52	-0.83	-0.00081	HCD (High Energy Collision Dissociation)	MS2	20.5492	30	64.1616	45888	01082019_Fusion_MASSFIITB_307198_S4.raw	F4		3.28		FALSE				0	2.597e-06	372410432	63.55	Sequest HT (A2)			Sequest HT (A2	uest HT	est HT	est HT	-0.83
		FALSE	High	Mascot (A5)	Unambiguous	[R].FLEQQNQVLQTKWELLQQVDTSTR.[T]		1	1	P04264	P04264	1	3	1	0	1	1	978.178	2932.52	2932.52	0.7	0.00069	HCD (High Energy Collision Dissociation)	MS2	8.49714	28.097	66.1188	48128	01082019_Fusion_MASSFIITB_307198_S3.raw	F3			68	FALSE	52	34	3.0105e-06	0	2.685e-06	10278809	65.69	Mascot (A5)			Mascot (A5)	cot (A5)	ot (A5)	ot (A5)	0.7
		FALSE	High	Mascot (A5)	Unambiguous	[R].FLEQQNQVLQTKWELLQQVDTSTR.[T]		1	1	P04264	P04264	1	3	0.9833	0	1	1	978.177	2932.52	2932.52	0.05	5e-05	HCD (High Energy Collision Dissociation)	MS2	3.16544	30	62.7628	44647	01082019_Fusion_MASSFIITB_307198_S4.raw	F4			60	FALSE	52	34	1.73953e-05	0	3.715e-06	18788734	62.71	Mascot (A5)			Mascot (A5)	cot (A5)	ot (A5)	ot (A5)	0.05
		FALSE	High	Mascot (A5)	Unambiguous	[R].FLEQQNQVLQTKWELLQQVDTSTR.[T]		1	1	P04264	P04264	1	3	1	0	1	1	978.176	2932.51	2932.52	-0.83	-0.00081	HCD (High Energy Collision Dissociation)	MS2	20.5492	30	64.1616	45888	01082019_Fusion_MASSFIITB_307198_S4.raw	F4			58	FALSE	52	35	3.38689e-05	0	2.308e-05	372410432	63.55	Mascot (A5)			Mascot (A5)	cot (A5)	ot (A5)	ot (A5)	-0.83
		FALSE	High	Sequest HT (A2)	Selected	[R].FLEQQNQVLQTKWELLQQVDTSTR.[T]		1	1	P04264	P04264	1	4	0.5335	0	1	1	733.884	2932.51	2932.52	-1.23	-0.0009	HCD (High Energy Collision Dissociation)	MS2	18.4581	24.3	63.38	45350	01082019_Fusion_MASSFIITB_307198_S2.raw	F2		3.28		FALSE				0	0.0001955	14255233	63.42	Sequest HT (A2)			Sequest HT (A2	uest HT	est HT	est HT	-1.23
		FALSE	High	Sequest HT (A2)	Selected	[R].FLEQQNQVLQTKWELLQQVDTSTR.[T]		1	1	P04264	P04264	1	4	0.518	0	1	1	733.884	2932.51	2932.52	-0.62	-0.00045	HCD (High Energy Collision Dissociation)	MS2	16.3179	17.053	63.5761	45367	01082019_Fusion_MASSFIITB_307198_S4.raw	F4		3.34		FALSE				0	0.0005641	21937100	63.51	Sequest HT (A2)			Sequest HT (A2	uest HT	est HT	est HT	-0.62
	FALSE	High	[R].FSSCGGGGGSFGAGGGFGSR.[S]	1xCarbamidomethyl [C4]		FALSE	1	1	76	P04264	P04264 [46-65]	0	1765.73	0	46.3	29	32.6	87.4	64.2	75.2	53.2	88.4	423.8		High	High	High	High	High	High	High	High	Peak Found	High	High	0	0	0.00464	9.065e-09	5.04	44	xCarbamidomethyl [C4]	R.FSSCGGGGGSFGAGGGFGSR.S	[46-65]	xCarbamidometh	rbamidom	bamidom	bamidom	53.2
		Checked	Confidence	Identifying Node	PSM Ambiguity	Annotated Sequence	Modifications	# Protein Groups	# Proteins	Master Protein Accessions	Protein Accessions	# Missed Cleavages	Charge	DeltaScore	DeltaCn	Rank	Search Engine Rank	m/z [Da]	MH+ [Da]	Theo. MH+ [Da]	DeltaM [ppm]	Deltam/z [Da]	Activation Type	MS Order	Isolation Interference [%]	Ion Inject Time [ms]	RT [min]	First Scan	Spectrum File	File ID	Quan Info	XCorr	Ions Score	Contaminant	Identity Strict	Identity Relaxed	Expectation Value	Percolator q-Value	Percolator PEP	Precursor Abundance	Apex RT [min]	Identifying Node			Identifying No	ntifying	tifying	tifying	DeltaM [ppm]
		FALSE	High	Sequest HT (A2)	Unambiguous	[R].FSScGGGGGSFGAGGGFGSR.[S]	C4(Carbamidomethyl)	1	1	P04264	P04264	0	2	0.8707	0	1	1	883.371	1765.73	1765.73	-0.38	-0.00033	HCD (High Energy Collision Dissociation)	MS2	0	30	43.3014	27600	01082019_Fusion_MASSFIITB_307198_S4.raw	F4		3.79		FALSE				0	3.526e-10	86863680	42.85	Sequest HT (A2)			Sequest HT (A2	uest HT	est HT	est HT	-0.38
		FALSE	High	Mascot (A5)	Unambiguous	[R].FSScGGGGGSFGAGGGFGSR.[S]	C4(Carbamidomethyl)	1	1	P04264	P04264	0	2	1	0	1	1	883.371	1765.73	1765.73	-0.38	-0.00033	HCD (High Energy Collision Dissociation)	MS2	0	30	43.3014	27600	01082019_Fusion_MASSFIITB_307198_S4.raw	F4			171	FALSE	43	26	2.18746e-17	0	4.046e-09	86863680	42.85	Mascot (A5)			Mascot (A5)	cot (A5)	ot (A5)	ot (A5)	-0.38
		FALSE	High	Mascot (A5)	Unambiguous	[R].FSScGGGGGSFGAGGGFGSR.[S]	C4(Carbamidomethyl)	1	1	P04264	P04264	0	2	1	0	1	1	883.37	1765.73	1765.73	-0.64	-0.00056	HCD (High Energy Collision Dissociation)	MS2	0	30	41.9396	26415	01082019_Fusion_MASSFIITB_307198_S4.raw	F4			160	FALSE	43	26	2.34931e-16	0	4.991e-09	163780432	42.23	Mascot (A5)			Mascot (A5)	cot (A5)	ot (A5)	ot (A5)	-0.64
		FALSE	High	Sequest HT (A2)	Unambiguous	[R].FSScGGGGGSFGAGGGFGSR.[S]	C4(Carbamidomethyl)	1	1	P04264	P04264	0	2	0.8796	0	1	1	883.371	1765.73	1765.73	-0.11	-0.0001	HCD (High Energy Collision Dissociation)	MS2	5.37344	30	41.3825	26150	01082019_Fusion_MASSFIITB_307198_S3.raw	F3		4.9		FALSE				0	7.836e-09	156900800	40.98	Sequest HT (A2)			Sequest HT (A2	uest HT	est HT	est HT	-0.11
		FALSE	High	Sequest HT (A2)	Unambiguous	[R].FSScGGGGGSFGAGGGFGSR.[S]	C4(Carbamidomethyl)	1	1	P04264	P04264	0	2	0.8492	0	1	1	883.371	1765.74	1765.73	0.27	0.00024	HCD (High Energy Collision Dissociation)	MS2	0	20.245	41.2494	25459	01082019_Fusion_MASSFIITB_307198_S5.raw	F5		5.04		FALSE				0	9.065e-09	236238560	40.77	Sequest HT (A2)			Sequest HT (A2	uest HT	est HT	est HT	0.27
		FALSE	High	Sequest HT (A2)	Unambiguous	[R].FSScGGGGGSFGAGGGFGSR.[S]	C4(Carbamidomethyl)	1	1	P04264	P04264	0	2	0.8775	0	1	1	883.37	1765.73	1765.73	-0.85	-0.00075	HCD (High Energy Collision Dissociation)	MS2	0	30	42.6203	26998	01082019_Fusion_MASSFIITB_307198_S4.raw	F4		4		FALSE				0	9.996e-09	163780432	42.23	Sequest HT (A2)			Sequest HT (A2	uest HT	est HT	est HT	-0.85
		FALSE	High	Sequest HT (A2)	Unambiguous	[R].FSScGGGGGSFGAGGGFGSR.[S]	C4(Carbamidomethyl)	1	1	P04264	P04264	0	2	0.8589	0	1	1	883.371	1765.73	1765.73	0.01	1e-05	HCD (High Energy Collision Dissociation)	MS2	0	30	41.0854	23480	01082019_Fusion_MASSFIITB_307198_S6.raw	F6		4.89		FALSE				0	1.021e-08	122976144	40.85	Sequest HT (A2)			Sequest HT (A2	uest HT	est HT	est HT	0.01
		FALSE	High	Sequest HT (A2)	Unambiguous	[R].FSScGGGGGSFGAGGGFGSR.[S]	C4(Carbamidomethyl)	1	1	P04264	P04264	0	2	0.8828	0	1	1	883.37	1765.73	1765.73	-0.64	-0.00056	HCD (High Energy Collision Dissociation)	MS2	0	30	41.9396	26415	01082019_Fusion_MASSFIITB_307198_S4.raw	F4		4.18		FALSE				0	1.136e-08	163780432	42.23	Sequest HT (A2)			Sequest HT (A2	uest HT	est HT	est HT	-0.64
		FALSE	High	Mascot (A5)	Unambiguous	[R].FSScGGGGGSFGAGGGFGSR.[S]	C4(Carbamidomethyl)	1	1	P04264	P04264	0	2	1	0	1	1	883.371	1765.73	1765.73	0.01	1e-05	HCD (High Energy Collision Dissociation)	MS2	0	30	41.0854	23480	01082019_Fusion_MASSFIITB_307198_S6.raw	F6			144	FALSE	43	26	1.09381e-14	0	3.218e-08	122976144	40.85	Mascot (A5)			Mascot (A5)	cot (A5)	ot (A5)	ot (A5)	0.01
		FALSE	High	Mascot (A5)	Unambiguous	[R].FSScGGGGGSFGAGGGFGSR.[S]	C4(Carbamidomethyl)	1	1	P04264	P04264	0	2	1	0	1	1	883.371	1765.74	1765.73	0.27	0.00024	HCD (High Energy Collision Dissociation)	MS2	0	20.245	41.2494	25459	01082019_Fusion_MASSFIITB_307198_S5.raw	F5			133	FALSE	43	26	1.13485e-13	0	3.922e-08	236238560	40.77	Mascot (A5)			Mascot (A5)	cot (A5)	ot (A5)	ot (A5)	0.27
		FALSE	High	Sequest HT (A2)	Unambiguous	[R].FSScGGGGGSFGAGGGFGSR.[S]	C4(Carbamidomethyl)	1	1	P04264	P04264	0	2	0.8601	0	1	1	883.371	1765.73	1765.73	-0.09	-8e-05	HCD (High Energy Collision Dissociation)	MS2	24.4389	26.829	41.2857	25487	01082019_Fusion_MASSFIITB_307198_S2.raw	F2		3.86		FALSE				0	4.598e-08	141151376	40.96	Sequest HT (A2)			Sequest HT (A2	uest HT	est HT	est HT	-0.09
		FALSE	High	Mascot (A5)	Unambiguous	[R].FSScGGGGGSFGAGGGFGSR.[S]	C4(Carbamidomethyl)	1	1	P04264	P04264	0	2	1	0	1	1	883.371	1765.73	1765.73	-0.11	-0.0001	HCD (High Energy Collision Dissociation)	MS2	5.37344	30	41.3825	26150	01082019_Fusion_MASSFIITB_307198_S3.raw	F3			141	FALSE	43	26	1.92726e-14	0	5.412e-08	156900800	40.98	Mascot (A5)			Mascot (A5)	cot (A5)	ot (A5)	ot (A5)	-0.11
		FALSE	High	Sequest HT (A2)	Unambiguous	[R].FSScGGGGGSFGAGGGFGSR.[S]	C4(Carbamidomethyl)	1	1	P04264	P04264	0	2	0.828	0	1	1	883.371	1765.73	1765.73	-0.23	-0.0002	HCD (High Energy Collision Dissociation)	MS2	5.70993	30	41.0187	24201	01082019_Fusion_MASSFIITB_307198_S8.raw	F8		3.78		FALSE				0	8.229e-08	94324976	40.83	Sequest HT (A2)			Sequest HT (A2	uest HT	est HT	est HT	-0.23
		FALSE	High	Mascot (A5)	Unambiguous	[R].FSScGGGGGSFGAGGGFGSR.[S]	C4(Carbamidomethyl)	1	1	P04264	P04264	0	2	1	0	1	1	883.37	1765.73	1765.73	-0.85	-0.00075	HCD (High Energy Collision Dissociation)	MS2	0	30	42.6203	26998	01082019_Fusion_MASSFIITB_307198_S4.raw	F4			142	FALSE	43	26	1.73356e-14	0	8.984e-08	163780432	42.23	Mascot (A5)			Mascot (A5)	cot (A5)	ot (A5)	ot (A5)	-0.85
		FALSE	High	Sequest HT (A2)	Unambiguous	[R].FSScGGGGGSFGAGGGFGSR.[S]	C4(Carbamidomethyl)	1	1	P04264	P04264	0	2	0.8794	0	1	1	883.371	1765.74	1765.73	0.57	0.0005	HCD (High Energy Collision Dissociation)	MS2	0	30	42.6171	26664	01082019_Fusion_MASSFIITB_307198_S5.raw	F5		3.15		FALSE				0	1.296e-07	105847264	42.32	Sequest HT (A2)			Sequest HT (A2	uest HT	est HT	est HT	0.57
		FALSE	High	Mascot (A5)	Unambiguous	[R].FSScGGGGGSFGAGGGFGSR.[S]	C4(Carbamidomethyl)	1	1	P04264	P04264	0	2	1	0	1	1	883.369	1765.73	1765.73	-2	-0.00177	HCD (High Energy Collision Dissociation)	MS2	0	30	41.9332	26051	01082019_Fusion_MASSFIITB_307198_S5.raw	F5			151	FALSE	43	26	2.03676e-15	0	2.088e-07	105847264	42.32	Mascot (A5)			Mascot (A5)	cot (A5)	ot (A5)	ot (A5)	-2
		FALSE	High	Mascot (A5)	Unambiguous	[R].FSScGGGGGSFGAGGGFGSR.[S]	C4(Carbamidomethyl)	1	1	P04264	P04264	0	2	1	0	1	1	883.371	1765.73	1765.73	-0.09	-8e-05	HCD (High Energy Collision Dissociation)	MS2	24.4389	26.829	41.2857	25487	01082019_Fusion_MASSFIITB_307198_S2.raw	F2			162	FALSE	43	26	1.65936e-16	0	2.2e-07	141151376	40.96	Mascot (A5)			Mascot (A5)	cot (A5)	ot (A5)	ot (A5)	-0.09
		FALSE	High	Mascot (A5)	Unambiguous	[R].FSScGGGGGSFGAGGGFGSR.[S]	C4(Carbamidomethyl)	1	1	P04264	P04264	0	2	1	0	1	1	883.372	1765.74	1765.73	1.47	0.0013	HCD (High Energy Collision Dissociation)	MS2	37.543	30	42.0645	26743	01082019_Fusion_MASSFIITB_307198_S3.raw	F3			123	FALSE	43	26	1.18288e-12	0	2.259e-07	156900800	40.98	Mascot (A5)			Mascot (A5)	cot (A5)	ot (A5)	ot (A5)	1.47
		FALSE	High	Sequest HT (A2)	Unambiguous	[R].FSScGGGGGSFGAGGGFGSR.[S]	C4(Carbamidomethyl)	1	1	P04264	P04264	0	2	0.8605	0	1	1	883.371	1765.73	1765.73	-0.31	-0.00027	HCD (High Energy Collision Dissociation)	MS2	4.94046	29.338	44.6733	28775	01082019_Fusion_MASSFIITB_307198_S4.raw	F4		3.44		FALSE				0	2.858e-07	23294054	44.89	Sequest HT (A2)			Sequest HT (A2	uest HT	est HT	est HT	-0.31
		FALSE	High	Mascot (A5)	Unambiguous	[R].FSScGGGGGSFGAGGGFGSR.[S]	C4(Carbamidomethyl)	1	1	P04264	P04264	0	2	1	0	1	1	883.371	1765.73	1765.73	-0.31	-0.00027	HCD (High Energy Collision Dissociation)	MS2	4.94046	29.338	44.6733	28775	01082019_Fusion_MASSFIITB_307198_S4.raw	F4			141	FALSE	43	26	1.77803e-14	0	2.966e-07	23294054	44.89	Mascot (A5)			Mascot (A5)	cot (A5)	ot (A5)	ot (A5)	-0.31
		FALSE	High	Mascot (A5)	Unambiguous	[R].FSScGGGGGSFGAGGGFGSR.[S]	C4(Carbamidomethyl)	1	1	P04264	P04264	0	2	1	0	1	1	883.371	1765.74	1765.73	0.57	0.0005	HCD (High Energy Collision Dissociation)	MS2	0	30	42.6171	26664	01082019_Fusion_MASSFIITB_307198_S5.raw	F5			125	FALSE	44	26	8.91196e-13	0	3.025e-07	105847264	42.32	Mascot (A5)			Mascot (A5)	cot (A5)	ot (A5)	ot (A5)	0.57
		FALSE	High	Sequest HT (A2)	Unambiguous	[R].FSScGGGGGSFGAGGGFGSR.[S]	C4(Carbamidomethyl)	1	1	P04264	P04264	0	2	0.8431	0	1	1	883.369	1765.73	1765.73	-2	-0.00177	HCD (High Energy Collision Dissociation)	MS2	0	30	41.9332	26051	01082019_Fusion_MASSFIITB_307198_S5.raw	F5		3.57		FALSE				0	3.224e-07	105847264	42.32	Sequest HT (A2)			Sequest HT (A2	uest HT	est HT	est HT	-2
		FALSE	High	Sequest HT (A2)	Unambiguous	[R].FSScGGGGGSFGAGGGFGSR.[S]	C4(Carbamidomethyl)	1	1	P04264	P04264	0	2	0.8509	0	1	1	883.371	1765.74	1765.73	0.27	0.00023	HCD (High Energy Collision Dissociation)	MS2	0	30	46.0469	30008	01082019_Fusion_MASSFIITB_307198_S4.raw	F4		3.42		FALSE				0	3.469e-07			Sequest HT (A2)			Sequest HT (A2	uest HT	est HT	est HT	0.27
		FALSE	High	Sequest HT (A2)	Unambiguous	[R].FSScGGGGGSFGAGGGFGSR.[S]	C4(Carbamidomethyl)	1	1	P04264	P04264	0	2	0.8619	0	1	1	883.372	1765.74	1765.73	1.47	0.0013	HCD (High Energy Collision Dissociation)	MS2	37.543	30	42.0645	26743	01082019_Fusion_MASSFIITB_307198_S3.raw	F3		3.62		FALSE				0	4.877e-07	156900800	40.98	Sequest HT (A2)			Sequest HT (A2	uest HT	est HT	est HT	1.47
		FALSE	High	Sequest HT (A2)	Unambiguous	[R].FSScGGGGGSFGAGGGFGSR.[S]	C4(Carbamidomethyl)	1	1	P04264	P04264	0	2	0.7838	0	1	1	883.372	1765.74	1765.73	1.15	0.00102	HCD (High Energy Collision Dissociation)	MS2	0	30	45.3613	29382	01082019_Fusion_MASSFIITB_307198_S4.raw	F4		3.33		FALSE				0	5.257e-07	23294054	44.89	Sequest HT (A2)			Sequest HT (A2	uest HT	est HT	est HT	1.15
		FALSE	High	Mascot (A5)	Unambiguous	[R].FSScGGGGGSFGAGGGFGSR.[S]	C4(Carbamidomethyl)	1	1	P04264	P04264	0	2	1	0	1	1	883.372	1765.74	1765.73	1.15	0.00102	HCD (High Energy Collision Dissociation)	MS2	0	30	45.3613	29382	01082019_Fusion_MASSFIITB_307198_S4.raw	F4			139	FALSE	44	26	3.28504e-14	0	5.403e-07	23294054	44.89	Mascot (A5)			Mascot (A5)	cot (A5)	ot (A5)	ot (A5)	1.15
		FALSE	High	Sequest HT (A2)	Unambiguous	[R].FSScGGGGGSFGAGGGFGSR.[S]	C4(Carbamidomethyl)	1	1	P04264	P04264	0	2	0.9103	0	1	1	883.371	1765.74	1765.73	0.57	0.0005	HCD (High Energy Collision Dissociation)	MS2	14.0489	30	41.208	25497	01082019_Fusion_MASSFIITB_307198_S1.raw	F1		3.12		FALSE				0	6.753e-07	98670512	40.79	Sequest HT (A2)			Sequest HT (A2	uest HT	est HT	est HT	0.57
		FALSE	High	Mascot (A5)	Unambiguous	[R].FSScGGGGGSFGAGGGFGSR.[S]	C4(Carbamidomethyl)	1	1	P04264	P04264	0	2	1	0	1	1	883.371	1765.73	1765.73	-0.2	-0.00018	HCD (High Energy Collision Dissociation)	MS2	0	30	41.7787	24083	01082019_Fusion_MASSFIITB_307198_S6.raw	F6			131	FALSE	43	26	2.2077e-13	0	8.158e-07	122976144	40.85	Mascot (A5)			Mascot (A5)	cot (A5)	ot (A5)	ot (A5)	-0.2
		FALSE	High	Mascot (A5)	Unambiguous	[R].FSScGGGGGSFGAGGGFGSR.[S]	C4(Carbamidomethyl)	1	1	P04264	P04264	0	2	1	0	1	1	883.371	1765.73	1765.73	-0.23	-0.0002	HCD (High Energy Collision Dissociation)	MS2	5.70993	30	41.0187	24201	01082019_Fusion_MASSFIITB_307198_S8.raw	F8			140	FALSE	43	26	2.47138e-14	0	8.396e-07	94324976	40.83	Mascot (A5)			Mascot (A5)	cot (A5)	ot (A5)	ot (A5)	-0.23
		FALSE	High	Mascot (A5)	Unambiguous	[R].FSScGGGGGSFGAGGGFGSR.[S]	C4(Carbamidomethyl)	1	1	P04264	P04264	0	2	1	0	1	1	883.371	1765.74	1765.73	0.27	0.00023	HCD (High Energy Collision Dissociation)	MS2	0	30	46.0469	30008	01082019_Fusion_MASSFIITB_307198_S4.raw	F4			137	FALSE	43	26	4.84105e-14	0	1.091e-06			Mascot (A5)			Mascot (A5)	cot (A5)	ot (A5)	ot (A5)	0.27
		FALSE	High	Sequest HT (A2)	Unambiguous	[R].FSScGGGGGSFGAGGGFGSR.[S]	C4(Carbamidomethyl)	1	1	P04264	P04264	0	2	0.9167	0	1	1	883.371	1765.73	1765.73	-0.2	-0.00018	HCD (High Energy Collision Dissociation)	MS2	0	30	41.7787	24083	01082019_Fusion_MASSFIITB_307198_S6.raw	F6		3.6		FALSE				0	1.324e-06	122976144	40.85	Sequest HT (A2)			Sequest HT (A2	uest HT	est HT	est HT	-0.2
		FALSE	High	Mascot (A5)	Unambiguous	[R].FSScGGGGGSFGAGGGFGSR.[S]	C4(Carbamidomethyl)	1	1	P04264	P04264	0	2	1	0	1	1	883.371	1765.74	1765.73	0.57	0.0005	HCD (High Energy Collision Dissociation)	MS2	14.0489	30	41.208	25497	01082019_Fusion_MASSFIITB_307198_S1.raw	F1			132	FALSE	44	26	1.48584e-13	0	1.442e-06	98670512	40.79	Mascot (A5)			Mascot (A5)	cot (A5)	ot (A5)	ot (A5)	0.57
		FALSE	High	Sequest HT (A2)	Unambiguous	[R].FSScGGGGGSFGAGGGFGSR.[S]	C4(Carbamidomethyl)	1	1	P04264	P04264	0	2	0.8627	0	1	1	883.371	1765.73	1765.73	-0.06	-6e-05	HCD (High Energy Collision Dissociation)	MS2	2.51855	10.01	41.2561	25833	01082019_Fusion_MASSFIITB_307198_S4.raw	F4		3.35		FALSE				0	1.455e-06	393866528	40.97	Sequest HT (A2)			Sequest HT (A2	uest HT	est HT	est HT	-0.06
		FALSE	High	Sequest HT (A2)	Unambiguous	[R].FSScGGGGGSFGAGGGFGSR.[S]	C4(Carbamidomethyl)	1	1	P04264	P04264	0	2	0.8265	0	1	1	883.371	1765.73	1765.73	-0.14	-0.00012	HCD (High Energy Collision Dissociation)	MS2	0	30	42.7502	27351	01082019_Fusion_MASSFIITB_307198_S3.raw	F3		2.94		FALSE				0	1.556e-06	43778212	42.49	Sequest HT (A2)			Sequest HT (A2	uest HT	est HT	est HT	-0.14
		FALSE	High	Mascot (A5)	Unambiguous	[R].FSScGGGGGSFGAGGGFGSR.[S]	C4(Carbamidomethyl)	1	1	P04264	P04264	0	2	1	0	1	1	883.371	1765.73	1765.73	0.04	3e-05	HCD (High Energy Collision Dissociation)	MS2	17.306	30	43.9864	28171	01082019_Fusion_MASSFIITB_307198_S4.raw	F4			119	FALSE	43	26	2.87038e-12	0	1.581e-06	63018276	43.99	Mascot (A5)			Mascot (A5)	cot (A5)	ot (A5)	ot (A5)	0.04
		FALSE	High	Sequest HT (A2)	Unambiguous	[R].FSScGGGGGSFGAGGGFGSR.[S]	C4(Carbamidomethyl)	1	1	P04264	P04264	0	2	0.8486	0	1	1	883.371	1765.73	1765.73	0.04	3e-05	HCD (High Energy Collision Dissociation)	MS2	17.306	30	43.9864	28171	01082019_Fusion_MASSFIITB_307198_S4.raw	F4		3.83		FALSE				0	2.179e-06	63018276	43.99	Sequest HT (A2)			Sequest HT (A2	uest HT	est HT	est HT	0.04
		FALSE	High	Mascot (A5)	Unambiguous	[R].FSScGGGGGSFGAGGGFGSR.[S]	C4(Carbamidomethyl)	1	1	P04264	P04264	0	2	1	0	1	1	883.371	1765.73	1765.73	-0.06	-6e-05	HCD (High Energy Collision Dissociation)	MS2	2.51855	10.01	41.2561	25833	01082019_Fusion_MASSFIITB_307198_S4.raw	F4			131	FALSE	43	26	2.13275e-13	0	3.989e-06	393866528	40.97	Mascot (A5)			Mascot (A5)	cot (A5)	ot (A5)	ot (A5)	-0.06
		FALSE	High	Sequest HT (A2)	Unambiguous	[R].FSScGGGGGSFGAGGGFGSR.[S]	C4(Carbamidomethyl)	1	1	P04264	P04264	0	2	0.8795	0	1	1	883.371	1765.73	1765.73	-0.41	-0.00037	HCD (High Energy Collision Dissociation)	MS2	42.5646	30	46.761	30638	01082019_Fusion_MASSFIITB_307198_S4.raw	F4		3.32		FALSE				0	7.403e-06	13917185	47.23	Sequest HT (A2)			Sequest HT (A2	uest HT	est HT	est HT	-0.41
		FALSE	High	Sequest HT (A2)	Unambiguous	[R].FSScGGGGGSFGAGGGFGSR.[S]	C4(Carbamidomethyl)	1	1	P04264	P04264	0	2	0.8703	0	1	1	883.371	1765.73	1765.73	-0.18	-0.00016	HCD (High Energy Collision Dissociation)	MS2	0	30	48.7242	32355	01082019_Fusion_MASSFIITB_307198_S4.raw	F4		2.93		FALSE				0	1.326e-05	16434726	48.31	Sequest HT (A2)			Sequest HT (A2	uest HT	est HT	est HT	-0.18
		FALSE	High	Mascot (A5)	Unambiguous	[R].FSScGGGGGSFGAGGGFGSR.[S]	C4(Carbamidomethyl)	1	1	P04264	P04264	0	2	0.9504	0	1	1	883.371	1765.73	1765.73	-0.14	-0.00012	HCD (High Energy Collision Dissociation)	MS2	0	30	42.7502	27351	01082019_Fusion_MASSFIITB_307198_S3.raw	F3			121	FALSE	43	26	1.81109e-12	0	1.4e-05	43778212	42.49	Mascot (A5)			Mascot (A5)	cot (A5)	ot (A5)	ot (A5)	-0.14
		FALSE	High	Sequest HT (A2)	Unambiguous	[R].FSScGGGGGSFGAGGGFGSR.[S]	C4(Carbamidomethyl)	1	1	P04264	P04264	0	2	0.8909	0	1	1	883.37	1765.73	1765.73	-0.72	-0.00064	HCD (High Energy Collision Dissociation)	MS2	0	30	41.971	26081	01082019_Fusion_MASSFIITB_307198_S2.raw	F2		2.75		FALSE				0	1.731e-05	46873788	42.47	Sequest HT (A2)			Sequest HT (A2	uest HT	est HT	est HT	-0.72
		FALSE	High	Mascot (A5)	Unambiguous	[R].FSScGGGGGSFGAGGGFGSR.[S]	C4(Carbamidomethyl)	1	1	P04264	P04264	0	2	1	0	1	1	883.37	1765.73	1765.73	-0.72	-0.00064	HCD (High Energy Collision Dissociation)	MS2	0	30	41.971	26081	01082019_Fusion_MASSFIITB_307198_S2.raw	F2			99	FALSE	43	26	3.34323e-10	0	1.751e-05	46873788	42.47	Mascot (A5)			Mascot (A5)	cot (A5)	ot (A5)	ot (A5)	-0.72
		FALSE	High	Sequest HT (A2)	Unambiguous	[R].FSScGGGGGSFGAGGGFGSR.[S]	C4(Carbamidomethyl)	1	1	P04264	P04264	0	2	0.8358	0	1	1	883.369	1765.73	1765.73	-1.71	-0.00151	HCD (High Energy Collision Dissociation)	MS2	0	30	42.665	26681	01082019_Fusion_MASSFIITB_307198_S2.raw	F2		3.35		FALSE				0	1.781e-05	46873788	42.47	Sequest HT (A2)			Sequest HT (A2	uest HT	est HT	est HT	-1.71
		FALSE	High	Sequest HT (A2)	Unambiguous	[R].FSScGGGGGSFGAGGGFGSR.[S]	C4(Carbamidomethyl)	1	1	P04264	P04264	0	2	0.7957	0	1	1	883.371	1765.73	1765.73	0.1	9e-05	HCD (High Energy Collision Dissociation)	MS2	0	30	43.3035	27267	01082019_Fusion_MASSFIITB_307198_S5.raw	F5		2.35		FALSE				0	2.005e-05			Sequest HT (A2)			Sequest HT (A2	uest HT	est HT	est HT	0.1
		FALSE	High	Mascot (A5)	Unambiguous	[R].FSScGGGGGSFGAGGGFGSR.[S]	C4(Carbamidomethyl)	1	1	P04264	P04264	0	2	1	0	1	1	883.371	1765.73	1765.73	-0.41	-0.00037	HCD (High Energy Collision Dissociation)	MS2	42.5646	30	46.761	30638	01082019_Fusion_MASSFIITB_307198_S4.raw	F4			99	FALSE	43	26	3.35691e-10	0	2.838e-05	13917185	47.23	Mascot (A5)			Mascot (A5)	cot (A5)	ot (A5)	ot (A5)	-0.41
		FALSE	High	Sequest HT (A2)	Unambiguous	[R].FSScGGGGGSFGAGGGFGSR.[S]	C4(Carbamidomethyl)	1	1	P04264	P04264	0	2	0.8885	0	1	1	883.371	1765.73	1765.73	0.04	4e-05	HCD (High Energy Collision Dissociation)	MS2	0	30	43.4372	27960	01082019_Fusion_MASSFIITB_307198_S3.raw	F3		3.05		FALSE				0	3.343e-05	24143238	43.39	Sequest HT (A2)			Sequest HT (A2	uest HT	est HT	est HT	0.04
		FALSE	High	Mascot (A5)	Unambiguous	[R].FSScGGGGGSFGAGGGFGSR.[S]	C4(Carbamidomethyl)	1	1	P04264	P04264	0	2	1	0	1	1	883.371	1765.73	1765.73	0.04	4e-05	HCD (High Energy Collision Dissociation)	MS2	0	30	43.4372	27960	01082019_Fusion_MASSFIITB_307198_S3.raw	F3			118	FALSE	43	26	4.23584e-12	0	4.037e-05	24143238	43.39	Mascot (A5)			Mascot (A5)	cot (A5)	ot (A5)	ot (A5)	0.04
		FALSE	High	Mascot (A5)	Unambiguous	[R].FSScGGGGGSFGAGGGFGSR.[S]	C4(Carbamidomethyl)	1	1	P04264	P04264	0	2	1	0	1	1	883.369	1765.73	1765.73	-1.71	-0.00151	HCD (High Energy Collision Dissociation)	MS2	0	30	42.665	26681	01082019_Fusion_MASSFIITB_307198_S2.raw	F2			114	FALSE	44	26	1.12973e-11	0	5.099e-05	46873788	42.47	Mascot (A5)			Mascot (A5)	cot (A5)	ot (A5)	ot (A5)	-1.71
		FALSE	High	Mascot (A5)	Unambiguous	[R].FSScGGGGGSFGAGGGFGSR.[S]	C4(Carbamidomethyl)	1	1	P04264	P04264	0	2	1	0	1	1	883.371	1765.73	1765.73	0.1	9e-05	HCD (High Energy Collision Dissociation)	MS2	0	30	43.3035	27267	01082019_Fusion_MASSFIITB_307198_S5.raw	F5			105	FALSE	43	26	7.42917e-11	0	5.131e-05			Mascot (A5)			Mascot (A5)	cot (A5)	ot (A5)	ot (A5)	0.1
		FALSE	High	Sequest HT (A2)	Unambiguous	[R].FSScGGGGGSFGAGGGFGSR.[S]	C4(Carbamidomethyl)	1	1	P04264	P04264	0	2	0.8352	0	1	1	883.369	1765.73	1765.73	-1.98	-0.00175	HCD (High Energy Collision Dissociation)	MS2	36.7611	30	40.5742	25243	01082019_Fusion_MASSFIITB_307198_S4.raw	F4		2.73		FALSE				0	5.618e-05	393866528	40.97	Sequest HT (A2)			Sequest HT (A2	uest HT	est HT	est HT	-1.98
		FALSE	High	Mascot (A5)	Unambiguous	[R].FSScGGGGGSFGAGGGFGSR.[S]	C4(Carbamidomethyl)	1	1	P04264	P04264	0	2	1	0	1	1	883.371	1765.73	1765.73	-0.18	-0.00016	HCD (High Energy Collision Dissociation)	MS2	0	30	48.7242	32355	01082019_Fusion_MASSFIITB_307198_S4.raw	F4			104	FALSE	43	26	9.59268e-11	0	6.645e-05	16434726	48.31	Mascot (A5)			Mascot (A5)	cot (A5)	ot (A5)	ot (A5)	-0.18
		FALSE	High	Sequest HT (A2)	Unambiguous	[R].FSScGGGGGSFGAGGGFGSR.[S]	C4(Carbamidomethyl)	1	1	P04264	P04264	0	2	0.8226	0	1	1	883.369	1765.73	1765.73	-1.79	-0.00158	HCD (High Energy Collision Dissociation)	MS2	52.1978	30	51.2867	34614	01082019_Fusion_MASSFIITB_307198_S4.raw	F4		2.48		FALSE				0	9.903e-05	5272477	51.23	Sequest HT (A2)			Sequest HT (A2	uest HT	est HT	est HT	-1.79
		FALSE	High	Mascot (A5)	Unambiguous	[R].FSScGGGGGSFGAGGGFGSR.[S]	C4(Carbamidomethyl)	1	1	P04264	P04264	0	2	1	0	1	1	883.369	1765.73	1765.73	-1.98	-0.00175	HCD (High Energy Collision Dissociation)	MS2	36.7611	30	40.5742	25243	01082019_Fusion_MASSFIITB_307198_S4.raw	F4			81	FALSE	43	26	1.9904e-08	0	0.00016	393866528	40.97	Mascot (A5)			Mascot (A5)	cot (A5)	ot (A5)	ot (A5)	-1.98
		FALSE	High	Sequest HT (A2)	Unambiguous	[R].FSScGGGGGSFGAGGGFGSR.[S]	C4(Carbamidomethyl)	1	1	P04264	P04264	0	2	0.864	0	1	1	883.371	1765.73	1765.73	-0.02	-2e-05	HCD (High Energy Collision Dissociation)	MS2	0	30	41.6962	24759	01082019_Fusion_MASSFIITB_307198_S8.raw	F8		2.5		FALSE				0	0.0002283	94324976	40.83	Sequest HT (A2)			Sequest HT (A2	uest HT	est HT	est HT	-0.02
		FALSE	High	Mascot (A5)	Selected	[R].FSScGGGGGSFGAGGGFGSR.[S]	C4(Carbamidomethyl)	1	1	P04264	P04264	0	2	1	0	1	1	883.371	1765.74	1765.73	0.42	0.00037	HCD (High Energy Collision Dissociation)	MS2	11.194	30	44.1223	28565	01082019_Fusion_MASSFIITB_307198_S3.raw	F3			75	FALSE	44	26	7.51577e-08	0	0.0003462			Mascot (A5)			Mascot (A5)	cot (A5)	ot (A5)	ot (A5)	0.42
		FALSE	High	Mascot (A5)	Unambiguous	[R].FSScGGGGGSFGAGGGFGSR.[S]	C4(Carbamidomethyl)	1	1	P04264	P04264	0	2	1	0	1	1	883.371	1765.73	1765.73	-0.02	-2e-05	HCD (High Energy Collision Dissociation)	MS2	0	30	41.6962	24759	01082019_Fusion_MASSFIITB_307198_S8.raw	F8			95	FALSE	43	26	7.96049e-10	0	0.0003925	94324976	40.83	Mascot (A5)			Mascot (A5)	cot (A5)	ot (A5)	ot (A5)	-0.02
		FALSE	High	Mascot (A5)	Unambiguous	[R].FSScGGGGGSFGAGGGFGSR.[S]	C4(Carbamidomethyl)	1	1	P04264	P04264	0	2	1	0	1	1	883.369	1765.73	1765.73	-1.79	-0.00158	HCD (High Energy Collision Dissociation)	MS2	52.1978	30	51.2867	34614	01082019_Fusion_MASSFIITB_307198_S4.raw	F4			71	FALSE	43	26	2.14753e-07	0	0.0004265	5272477	51.23	Mascot (A5)			Mascot (A5)	cot (A5)	ot (A5)	ot (A5)	-1.79
		FALSE	High	Sequest HT (A2)	Unambiguous	[R].FSScGGGGGSFGAGGGFGSR.[S]	C4(Carbamidomethyl)	1	1	P04264	P04264	0	2	0.8035	0	1	1	883.37	1765.73	1765.73	-1.17	-0.00104	HCD (High Energy Collision Dissociation)	MS2	0	30	43.35	27291	01082019_Fusion_MASSFIITB_307198_S2.raw	F2		2.85		FALSE				0	0.0004299			Sequest HT (A2)			Sequest HT (A2	uest HT	est HT	est HT	-1.17
		FALSE	High	Sequest HT (A2)	Unambiguous	[R].FSScGGGGGSFGAGGGFGSR.[S]	C4(Carbamidomethyl)	1	1	P04264	P04264	0	2	0.8898	0	1	1	883.371	1765.73	1765.73	0.17	0.00015	HCD (High Energy Collision Dissociation)	MS2	39.6917	30	40.6936	25547	01082019_Fusion_MASSFIITB_307198_S3.raw	F3		2.54		FALSE				0	0.0009143	156900800	40.98	Sequest HT (A2)			Sequest HT (A2	uest HT	est HT	est HT	0.17
		FALSE	High	Mascot (A5)	Unambiguous	[R].FSScGGGGGSFGAGGGFGSR.[S]	C4(Carbamidomethyl)	1	1	P04264	P04264	0	2	1	0	1	1	883.37	1765.73	1765.73	-1.17	-0.00104	HCD (High Energy Collision Dissociation)	MS2	0	30	43.35	27291	01082019_Fusion_MASSFIITB_307198_S2.raw	F2			74	FALSE	44	26	9.54934e-08	0	0.001236			Mascot (A5)			Mascot (A5)	cot (A5)	ot (A5)	ot (A5)	-1.17
		FALSE	High	Sequest HT (A2)	Unambiguous	[R].FSScGGGGGSFGAGGGFGSR.[S]	C4(Carbamidomethyl)	1	1	P04264	P04264	0	2	0.8537	0	1	1	883.37	1765.73	1765.73	-0.59	-0.00052	HCD (High Energy Collision Dissociation)	MS2	0	30	49.4103	32951	01082019_Fusion_MASSFIITB_307198_S4.raw	F4		2.46		FALSE				0	0.0013	8.28899e+06	49.38	Sequest HT (A2)			Sequest HT (A2	uest HT	est HT	est HT	-0.59
		FALSE	High	Sequest HT (A2)	Unambiguous	[R].FSScGGGGGSFGAGGGFGSR.[S]	C4(Carbamidomethyl)	1	1	P04264	P04264	0	2	0.8554	0	1	1	883.37	1765.73	1765.73	-1.08	-0.00096	HCD (High Energy Collision Dissociation)	MS2	52.3716	30	48.0467	31773	01082019_Fusion_MASSFIITB_307198_S4.raw	F4		2.49		FALSE				0	0.002255	16434726	48.31	Sequest HT (A2)			Sequest HT (A2	uest HT	est HT	est HT	-1.08
		FALSE	High	Mascot (A5)	Unambiguous	[R].FSScGGGGGSFGAGGGFGSR.[S]	C4(Carbamidomethyl)	1	1	P04264	P04264	0	2	1	0	1	1	883.371	1765.73	1765.73	0.17	0.00015	HCD (High Energy Collision Dissociation)	MS2	39.6917	30	40.6936	25547	01082019_Fusion_MASSFIITB_307198_S3.raw	F3			66	FALSE	43	26	6.59083e-07	0	0.002262	156900800	40.98	Mascot (A5)			Mascot (A5)	cot (A5)	ot (A5)	ot (A5)	0.17
		FALSE	High	Mascot (A5)	Selected	[R].FSScGGGGGSFGAGGGFGSR.[S]	C4(Carbamidomethyl)	1	1	P04264	P04264	0	2	1	0	1	1	883.371	1765.73	1765.73	-0.07	-6e-05	HCD (High Energy Collision Dissociation)	MS2	3.63436	30	40.9887	22188	01082019_Fusion_MASSFIITB_307198_S7.raw	F7			66	FALSE	43	26	6.1651e-07	0	0.003115	20796250	40.8	Mascot (A5)			Mascot (A5)	cot (A5)	ot (A5)	ot (A5)	-0.07
		FALSE	High	Mascot (A5)	Unambiguous	[R].FSScGGGGGSFGAGGGFGSR.[S]	C4(Carbamidomethyl)	1	1	P04264	P04264	0	2	1	0	1	1	883.369	1765.73	1765.73	-2.37	-0.00209	HCD (High Energy Collision Dissociation)	MS2	0	30	40.5645	24880	01082019_Fusion_MASSFIITB_307198_S5.raw	F5			80	FALSE	43	26	2.72374e-08	0	0.004064	236238560	40.77	Mascot (A5)			Mascot (A5)	cot (A5)	ot (A5)	ot (A5)	-2.37
		FALSE	High	Mascot (A5)	Unambiguous	[R].FSScGGGGGSFGAGGGFGSR.[S]	C4(Carbamidomethyl)	1	1	P04264	P04264	0	2	1	0	1	1	883.368	1765.73	1765.73	-3.85	-0.0034	HCD (High Energy Collision Dissociation)	MS2	46.0374	30	50.5621	33974	01082019_Fusion_MASSFIITB_307198_S4.raw	F4			44	FALSE	44	26	0.000110363	0	0.00464	6958546	50.7	Mascot (A5)			Mascot (A5)	cot (A5)	ot (A5)	ot (A5)	-3.85
		FALSE	High	Mascot (A5)	Unambiguous	[R].FSScGGGGGSFGAGGGFGSR.[S]	C4(Carbamidomethyl)	1	1	P04264	P04264	0	2	1	0	1	1	883.37	1765.73	1765.73	-0.59	-0.00052	HCD (High Energy Collision Dissociation)	MS2	0	30	49.4103	32951	01082019_Fusion_MASSFIITB_307198_S4.raw	F4			65	FALSE	43	26	8.03415e-07	0	0.006207	8.28899e+06	49.38	Mascot (A5)			Mascot (A5)	cot (A5)	ot (A5)	ot (A5)	-0.59
		FALSE	High	Sequest HT (A2)	Unambiguous	[R].FSScGGGGGSFGAGGGFGSR.[S]	C4(Carbamidomethyl)	1	1	P04264	P04264	0	2	0.8313	0	1	1	883.368	1765.73	1765.73	-3.85	-0.0034	HCD (High Energy Collision Dissociation)	MS2	46.0374	30	50.5621	33974	01082019_Fusion_MASSFIITB_307198_S4.raw	F4		2.43		FALSE				0	0.006838	6958546	50.7	Sequest HT (A2)			Sequest HT (A2	uest HT	est HT	est HT	-3.85
		FALSE	High	Sequest HT (A2)	Unambiguous	[R].FSScGGGGGSFGAGGGFGSR.[S]	C4(Carbamidomethyl)	1	1	P04264	P04264	0	2	0.8381	0	1	1	883.369	1765.73	1765.73	-2.37	-0.00209	HCD (High Energy Collision Dissociation)	MS2	0	30	40.5645	24880	01082019_Fusion_MASSFIITB_307198_S5.raw	F5		2.47		FALSE				0	0.006966	236238560	40.77	Sequest HT (A2)			Sequest HT (A2	uest HT	est HT	est HT	-2.37
		FALSE	High	Mascot (A5)	Selected	[R].FSScGGGGGSFGAGGGFGSR.[S]	C4(Carbamidomethyl)	1	1	P04264	P04264	0	2	1	0	1	1	883.37	1765.73	1765.73	-1.14	-0.00101	HCD (High Energy Collision Dissociation)	MS2	11.7534	30	44.8177	29157	01082019_Fusion_MASSFIITB_307198_S3.raw	F3			66	FALSE	44	26	6.68303e-07	0	0.007106			Mascot (A5)			Mascot (A5)	cot (A5)	ot (A5)	ot (A5)	-1.14
		FALSE	High	Mascot (A5)	Unambiguous	[R].FSScGGGGGSFGAGGGFGSR.[S]	C4(Carbamidomethyl)	1	1	P04264	P04264	0	2	1	0	1	1	883.37	1765.73	1765.73	-1.08	-0.00096	HCD (High Energy Collision Dissociation)	MS2	52.3716	30	48.0467	31773	01082019_Fusion_MASSFIITB_307198_S4.raw	F4			51	FALSE	44	26	2.15265e-05	0	0.008674	16434726	48.31	Mascot (A5)			Mascot (A5)	cot (A5)	ot (A5)	ot (A5)	-1.08
		FALSE	High	Mascot (A5)	Selected	[R].FSScGGGGGSFGAGGGFGSR.[S]	C4(Carbamidomethyl)	1	1	P04264	P04264	0	2	1	0	1	1	883.373	1765.74	1765.73	1.95	0.00173	HCD (High Energy Collision Dissociation)	MS2	38.7433	30	44.878	28647	01082019_Fusion_MASSFIITB_307198_S5.raw	F5			53	FALSE	44	26	1.40723e-05	0	0.01899			Mascot (A5)			Mascot (A5)	cot (A5)	ot (A5)	ot (A5)	1.95
		FALSE	High	Mascot (A5)	Selected	[R].FSScGGGGGSFGAGGGFGSR.[S]	C4(Carbamidomethyl)	1	1	P04264	P04264	0	2	1	0	1	1	883.369	1765.73	1765.73	-2.08	-0.00183	HCD (High Energy Collision Dissociation)	MS2	0	30	40.6137	24895	01082019_Fusion_MASSFIITB_307198_S2.raw	F2			64	FALSE	43	26	1.04698e-06	0.004978	0.09346	141151376	40.96	Mascot (A5)			Mascot (A5)	cot (A5)	ot (A5)	ot (A5)	-2.08
		FALSE	High	Mascot (A5)	Selected	[R].FSScGGGGGSFGAGGGFGSR.[S]	C4(Carbamidomethyl)	1	1	P04264	P04264	0	2	1	0	1	1	883.368	1765.73	1765.73	-3.21	-0.00283	HCD (High Energy Collision Dissociation)	MS2	15.9252	30	46.8755	31008	01082019_Fusion_MASSFIITB_307198_S3.raw	F3			48	FALSE	44	26	4.91247e-05	0.007764	0.1244	10732157	46.7	Mascot (A5)			Mascot (A5)	cot (A5)	ot (A5)	ot (A5)	-3.21
		FALSE	High	Mascot (A5)	Selected	[R].FSScGGGGGSFGAGGGFGSR.[S]	C4(Carbamidomethyl)	1	1	P04264	P04264	0	2	1	0	1	1	883.372	1765.74	1765.73	0.98	0.00086	HCD (High Energy Collision Dissociation)	MS2	16.1834	30	44.594	26507	01082019_Fusion_MASSFIITB_307198_S6.raw	F6			51	FALSE	44	26	1.97488e-05	0.02436	0.2154			Mascot (A5)			Mascot (A5)	cot (A5)	ot (A5)	ot (A5)	0.98
		FALSE	High	Mascot (A5)	Selected	[R].FSScGGGGGSFGAGGGFGSR.[S]	C4(Carbamidomethyl)	1	1	P04264	P04264	0	2	1	0	1	1	883.371	1765.73	1765.73	-0.13	-0.00011	HCD (High Energy Collision Dissociation)	MS2	0	30	43.9053	25915	01082019_Fusion_MASSFIITB_307198_S6.raw	F6			45	FALSE	43	26	8.1647e-05	0.03806	0.2795			Mascot (A5)			Mascot (A5)	cot (A5)	ot (A5)	ot (A5)	-0.13
	FALSE	High	[R].FLEQQNQVLQTK.[W]			FALSE	3	3	41	Q7Z794; P35908; P04264	Q7Z794 [184-195]; P35908 [198-209]; P04264 [200-211]	0	1475.79	0	104.9	78.2	115.4	130	100	105.4	124.3	118.5	23.3	Shared	High	High	High	High	High	High	High	High	Peak Found	High	High	0	0	0.00573	0.0002739	3.25	40		R.FLEQQNQVLQTK.W	[200-211]					124.3
		Checked	Confidence	Identifying Node	PSM Ambiguity	Annotated Sequence	Modifications	# Protein Groups	# Proteins	Master Protein Accessions	Protein Accessions	# Missed Cleavages	Charge	DeltaScore	DeltaCn	Rank	Search Engine Rank	m/z [Da]	MH+ [Da]	Theo. MH+ [Da]	DeltaM [ppm]	Deltam/z [Da]	Activation Type	MS Order	Isolation Interference [%]	Ion Inject Time [ms]	RT [min]	First Scan	Spectrum File	File ID	Quan Info	XCorr	Ions Score	Contaminant	Identity Strict	Identity Relaxed	Expectation Value	Percolator q-Value	Percolator PEP	Precursor Abundance	Apex RT [min]	Identifying Node			Identifying No	ntifying	tifying	tifying	DeltaM [ppm]
		FALSE	High	Mascot (A5)	Selected	[R].FLEQQNQVLQTK.[W]		3	3	Q7Z794; P35908; P04264	Q7Z794; P35908; P04264	0	2	0.7717	0	1	1	738.396	1475.79	1475.79	-0.03	-2e-05	HCD (High Energy Collision Dissociation)	MS2	0	30	90.3128	65639	01082019_Fusion_MASSFIITB_307198_S3.raw	F3			92	FALSE	55	37	2.15549e-08	0	3.535e-06	10416289	90.39	Mascot (A5)			Mascot (A5)	cot (A5)	ot (A5)	ot (A5)	-0.03
		FALSE	High	Sequest HT (A2)	Unambiguous	[R].FLEQQNQVLQTK.[W]		3	3	Q7Z794; P35908; P04264	Q7Z794; P35908; P04264	0	2	0.649	0	1	1	738.396	1475.78	1475.79	-0.21	-0.00015	HCD (High Energy Collision Dissociation)	MS2	15.0317	30	39.8175	22421	01082019_Fusion_MASSFIITB_307198_S6.raw	F6		2.45		FALSE				0	3.56e-06	767441152	39.32	Sequest HT (A2)			Sequest HT (A2	uest HT	est HT	est HT	-0.21
		FALSE	High	Sequest HT (A2)	Unambiguous	[R].FLEQQNQVLQTK.[W]		3	3	Q7Z794; P35908; P04264	Q7Z794; P35908; P04264	0	2	0.623	0	1	1	738.397	1475.79	1475.79	1.08	0.0008	HCD (High Energy Collision Dissociation)	MS2	8.8794	23.5	39.1667	24265	01082019_Fusion_MASSFIITB_307198_S3.raw	F3		3.13		FALSE				0	3.986e-06	3268648192	39.33	Sequest HT (A2)			Sequest HT (A2	uest HT	est HT	est HT	1.08
		FALSE	High	Mascot (A5)	Unambiguous	[R].FLEQQNQVLQTK.[W]		3	3	Q7Z794; P35908; P04264	Q7Z794; P35908; P04264	0	2	0.7746	0	1	1	738.395	1475.78	1475.79	-1.99	-0.00147	HCD (High Energy Collision Dissociation)	MS2	0	30	40.5245	24847	01082019_Fusion_MASSFIITB_307198_S5.raw	F5			71	FALSE	54	37	2.23479e-06	0	4.696e-06	2144869888	39.32	Mascot (A5)			Mascot (A5)	cot (A5)	ot (A5)	ot (A5)	-1.99
		FALSE	High	Mascot (A5)	Unambiguous	[R].FLEQQNQVLQTK.[W]		3	3	Q7Z794; P35908; P04264	Q7Z794; P35908; P04264	0	2	0.8553	0	1	1	738.395	1475.78	1475.79	-1.22	-0.0009	HCD (High Energy Collision Dissociation)	MS2	18.2072	24.096	41.9463	26640	01082019_Fusion_MASSFIITB_307198_S3.raw	F3			76	FALSE	54	37	8.60992e-07	0	4.779e-06			Mascot (A5)			Mascot (A5)	cot (A5)	ot (A5)	ot (A5)	-1.22
		FALSE	High	Sequest HT (A2)	Unambiguous	[R].FLEQQNQVLQTK.[W]		3	3	Q7Z794; P35908; P04264	Q7Z794; P35908; P04264	0	2	0.6777	0	1	1	738.396	1475.79	1475.79	0.19	0.00014	HCD (High Energy Collision Dissociation)	MS2	1.65039	9.64	39.8441	24848	01082019_Fusion_MASSFIITB_307198_S3.raw	F3		2.73		FALSE				0	5.199e-06	3268648192	39.33	Sequest HT (A2)			Sequest HT (A2	uest HT	est HT	est HT	0.19
		FALSE	High	Sequest HT (A2)	Unambiguous	[R].FLEQQNQVLQTK.[W]		3	3	Q7Z794; P35908; P04264	Q7Z794; P35908; P04264	0	2	0.6747	0	1	1	738.397	1475.79	1475.79	1.39	0.00102	HCD (High Energy Collision Dissociation)	MS2	25.6538	30	39.1461	23683	01082019_Fusion_MASSFIITB_307198_S5.raw	F5		2.92		FALSE				0	6.146e-06	2144869888	39.32	Sequest HT (A2)			Sequest HT (A2	uest HT	est HT	est HT	1.39
		FALSE	High	Sequest HT (A2)	Unambiguous	[R].FLEQQNQVLQTK.[W]		3	3	Q7Z794; P35908; P04264	Q7Z794; P35908; P04264	0	2	0.585	0	1	1	738.395	1475.78	1475.79	-1.09	-0.00081	HCD (High Energy Collision Dissociation)	MS2	4.87148	30	39.8403	24299	01082019_Fusion_MASSFIITB_307198_S1.raw	F1		2.53		FALSE				0	7.566e-06	1006419200	39.34	Sequest HT (A2)			Sequest HT (A2	uest HT	est HT	est HT	-1.09
		FALSE	High	Mascot (A5)	Unambiguous	[R].FLEQQNQVLQTK.[W]		3	3	Q7Z794; P35908; P04264	Q7Z794; P35908; P04264	0	2	0.8272	0	1	1	738.396	1475.78	1475.79	-0.42	-0.00031	HCD (High Energy Collision Dissociation)	MS2	8.15326	21.69	39.8218	24257	01082019_Fusion_MASSFIITB_307198_S5.raw	F5			81	FALSE	55	37	2.55305e-07	0	7.753e-06	2144869888	39.32	Mascot (A5)			Mascot (A5)	cot (A5)	ot (A5)	ot (A5)	-0.42
		FALSE	High	Mascot (A5)	Unambiguous	[R].FLEQQNQVLQTK.[W]		3	3	Q7Z794; P35908; P04264	Q7Z794; P35908; P04264	0	2	0.7746	0	1	1	738.397	1475.79	1475.79	1.48	0.00109	HCD (High Energy Collision Dissociation)	MS2	19.1098	28.107	48.6691	32306	01082019_Fusion_MASSFIITB_307198_S4.raw	F4			71	FALSE	54	36	2.22069e-06	0	7.763e-06	13934866	48.74	Mascot (A5)			Mascot (A5)	cot (A5)	ot (A5)	ot (A5)	1.48
		FALSE	High	Sequest HT (A2)	Unambiguous	[R].FLEQQNQVLQTK.[W]		3	3	Q7Z794; P35908; P04264	Q7Z794; P35908; P04264	0	2	0.6417	0	1	1	738.398	1475.79	1475.79	2.02	0.00149	HCD (High Energy Collision Dissociation)	MS2	13.1405	30	39.1258	24014	01082019_Fusion_MASSFIITB_307198_S4.raw	F4		2.54		FALSE				0	9.241e-06	4519849984	39.37	Sequest HT (A2)			Sequest HT (A2	uest HT	est HT	est HT	2.02
		FALSE	High	Sequest HT (A2)	Unambiguous	[R].FLEQQNQVLQTK.[W]		3	3	Q7Z794; P35908; P04264	Q7Z794; P35908; P04264	0	2	0.6217	0	1	1	738.395	1475.78	1475.79	-1.99	-0.00147	HCD (High Energy Collision Dissociation)	MS2	0	30	40.5245	24847	01082019_Fusion_MASSFIITB_307198_S5.raw	F5		2.3		FALSE				0	9.901e-06	2144869888	39.32	Sequest HT (A2)			Sequest HT (A2	uest HT	est HT	est HT	-1.99
		FALSE	High	Mascot (A5)	Unambiguous	[R].FLEQQNQVLQTK.[W]		3	3	Q7Z794; P35908; P04264	Q7Z794; P35908; P04264	0	2	0.8684	0	1	1	738.395	1475.78	1475.79	-1.09	-0.00081	HCD (High Energy Collision Dissociation)	MS2	4.87148	30	39.8403	24299	01082019_Fusion_MASSFIITB_307198_S1.raw	F1			76	FALSE	54	37	7.27779e-07	0	1.005e-05	1006419200	39.34	Mascot (A5)			Mascot (A5)	cot (A5)	ot (A5)	ot (A5)	-1.09
		FALSE	High	Sequest HT (A2)	Unambiguous	[R].FLEQQNQVLQTK.[W]		3	3	Q7Z794; P35908; P04264	Q7Z794; P35908; P04264	0	2	0.5413	0	1	1	738.395	1475.78	1475.79	-1.22	-0.0009	HCD (High Energy Collision Dissociation)	MS2	18.2072	24.096	41.9463	26640	01082019_Fusion_MASSFIITB_307198_S3.raw	F3		2.42		FALSE				0	1.016e-05			Sequest HT (A2)			Sequest HT (A2	uest HT	est HT	est HT	-1.22
		FALSE	High	Mascot (A5)	Unambiguous	[R].FLEQQNQVLQTK.[W]		3	3	Q7Z794; P35908; P04264	Q7Z794; P35908; P04264	0	2	0.8095	0	1	1	738.396	1475.79	1475.79	0.19	0.00014	HCD (High Energy Collision Dissociation)	MS2	1.65039	9.64	39.8441	24848	01082019_Fusion_MASSFIITB_307198_S3.raw	F3			84	FALSE	55	37	1.25761e-07	0	1.019e-05	3268648192	39.33	Mascot (A5)			Mascot (A5)	cot (A5)	ot (A5)	ot (A5)	0.19
		FALSE	High	Sequest HT (A2)	Unambiguous	[R].FLEQQNQVLQTK.[W]		3	3	Q7Z794; P35908; P04264	Q7Z794; P35908; P04264	0	2	0.6643	0	1	1	738.396	1475.79	1475.79	0.18	0.00013	HCD (High Energy Collision Dissociation)	MS2	1.31748	8.185	39.8054	24564	01082019_Fusion_MASSFIITB_307198_S4.raw	F4		2.83		FALSE				0	1.023e-05	4519849984	39.37	Sequest HT (A2)			Sequest HT (A2	uest HT	est HT	est HT	0.18
		FALSE	High	Mascot (A5)	Unambiguous	[R].FLEQQNQVLQTK.[W]		3	3	Q7Z794; P35908; P04264	Q7Z794; P35908; P04264	0	2	0.809	0	1	1	738.396	1475.79	1475.79	0.18	0.00013	HCD (High Energy Collision Dissociation)	MS2	1.31748	8.185	39.8054	24564	01082019_Fusion_MASSFIITB_307198_S4.raw	F4			89	FALSE	55	37	4.1452e-08	0	1.079e-05	4519849984	39.37	Mascot (A5)			Mascot (A5)	cot (A5)	ot (A5)	ot (A5)	0.18
		FALSE	High	Mascot (A5)	Unambiguous	[R].FLEQQNQVLQTK.[W]		3	3	Q7Z794; P35908; P04264	Q7Z794; P35908; P04264	0	2	0.8481	0	1	1	738.397	1475.79	1475.79	1.34	0.00099	HCD (High Energy Collision Dissociation)	MS2	12.3646	25.557	39.1648	23725	01082019_Fusion_MASSFIITB_307198_S1.raw	F1			79	FALSE	54	36	3.45316e-07	0	1.241e-05	1006419200	39.34	Mascot (A5)			Mascot (A5)	cot (A5)	ot (A5)	ot (A5)	1.34
		FALSE	High	Sequest HT (A2)	Unambiguous	[R].FLEQQNQVLQTK.[W]		3	3	Q7Z794; P35908; P04264	Q7Z794; P35908; P04264	0	2	0.6719	0	1	1	738.396	1475.79	1475.79	-0.12	-9e-05	HCD (High Energy Collision Dissociation)	MS2	0	26.372	39.8175	24205	01082019_Fusion_MASSFIITB_307198_S2.raw	F2		2.53		FALSE				0	1.417e-05	1974388608	39.31	Sequest HT (A2)			Sequest HT (A2	uest HT	est HT	est HT	-0.12
		FALSE	High	Sequest HT (A2)	Unambiguous	[R].FLEQQNQVLQTK.[W]		3	3	Q7Z794; P35908; P04264	Q7Z794; P35908; P04264	0	2	0.6711	0	1	1	738.397	1475.79	1475.79	1.34	0.00099	HCD (High Energy Collision Dissociation)	MS2	12.3646	25.557	39.1648	23725	01082019_Fusion_MASSFIITB_307198_S1.raw	F1		2.98		FALSE				0	1.904e-05	1006419200	39.34	Sequest HT (A2)			Sequest HT (A2	uest HT	est HT	est HT	1.34
		FALSE	High	Sequest HT (A2)	Unambiguous	[R].FLEQQNQVLQTK.[W]		3	3	Q7Z794; P35908; P04264	Q7Z794; P35908; P04264	0	2	0.5895	0	1	1	738.396	1475.78	1475.79	-0.42	-0.00031	HCD (High Energy Collision Dissociation)	MS2	8.15326	21.69	39.8218	24257	01082019_Fusion_MASSFIITB_307198_S5.raw	F5		2.85		FALSE				0	2.213e-05	2144869888	39.32	Sequest HT (A2)			Sequest HT (A2	uest HT	est HT	est HT	-0.42
		FALSE	High	Mascot (A5)	Unambiguous	[R].FLEQQNQVLQTK.[W]		3	3	Q7Z794; P35908; P04264	Q7Z794; P35908; P04264	0	2	0.8871	0	1	1	738.396	1475.79	1475.79	-0.07	-5e-05	HCD (High Energy Collision Dissociation)	MS2	39.8085	30	41.2416	25451	01082019_Fusion_MASSFIITB_307198_S5.raw	F5			62	FALSE	55	37	1.97945e-05	0	2.437e-05			Mascot (A5)			Mascot (A5)	cot (A5)	ot (A5)	ot (A5)	-0.07
		FALSE	High	Mascot (A5)	Unambiguous	[R].FLEQQNQVLQTK.[W]		3	3	Q7Z794; P35908; P04264	Q7Z794; P35908; P04264	0	2	0.7857	0	1	1	738.397	1475.79	1475.79	1.08	0.0008	HCD (High Energy Collision Dissociation)	MS2	8.8794	23.5	39.1667	24265	01082019_Fusion_MASSFIITB_307198_S3.raw	F3			98	FALSE	54	37	5.32421e-09	0	2.57e-05	3268648192	39.33	Mascot (A5)			Mascot (A5)	cot (A5)	ot (A5)	ot (A5)	1.08
		FALSE	High	Mascot (A5)	Unambiguous	[R].FLEQQNQVLQTK.[W]		3	3	Q7Z794; P35908; P04264	Q7Z794; P35908; P04264	0	2	0.7975	0	1	1	738.396	1475.79	1475.79	-0.12	-9e-05	HCD (High Energy Collision Dissociation)	MS2	0	26.372	39.8175	24205	01082019_Fusion_MASSFIITB_307198_S2.raw	F2			79	FALSE	54	37	4.09553e-07	0	2.948e-05	1974388608	39.31	Mascot (A5)			Mascot (A5)	cot (A5)	ot (A5)	ot (A5)	-0.12
		FALSE	High	Sequest HT (A2)	Unambiguous	[R].FLEQQNQVLQTK.[W]		3	3	Q7Z794; P35908; P04264	Q7Z794; P35908; P04264	0	2	0.4783	0	1	1	738.396	1475.79	1475.79	-0.07	-5e-05	HCD (High Energy Collision Dissociation)	MS2	39.8085	30	41.2416	25451	01082019_Fusion_MASSFIITB_307198_S5.raw	F5		2.53		FALSE				0	3.343e-05			Sequest HT (A2)			Sequest HT (A2	uest HT	est HT	est HT	-0.07
		FALSE	High	Mascot (A5)	Unambiguous	[R].FLEQQNQVLQTK.[W]		3	3	Q7Z794; P35908; P04264	Q7Z794; P35908; P04264	0	2	0.8732	0	1	1	738.396	1475.78	1475.79	-0.21	-0.00015	HCD (High Energy Collision Dissociation)	MS2	15.0317	30	39.8175	22421	01082019_Fusion_MASSFIITB_307198_S6.raw	F6			71	FALSE	54	36	2.57387e-06	0	3.71e-05	767441152	39.32	Mascot (A5)			Mascot (A5)	cot (A5)	ot (A5)	ot (A5)	-0.21
		FALSE	High	Sequest HT (A2)	Unambiguous	[R].FLEQQNQVLQTK.[W]		3	3	Q7Z794; P35908; P04264	Q7Z794; P35908; P04264	0	2	0.6049	0	1	1	738.397	1475.79	1475.79	1.48	0.00109	HCD (High Energy Collision Dissociation)	MS2	19.1098	28.107	48.6691	32306	01082019_Fusion_MASSFIITB_307198_S4.raw	F4		2.43		FALSE				0	4.089e-05	13934866	48.74	Sequest HT (A2)			Sequest HT (A2	uest HT	est HT	est HT	1.48
		FALSE	High	Mascot (A5)	Unambiguous	[R].FLEQQNQVLQTK.[W]		3	3	Q7Z794; P35908; P04264	Q7Z794; P35908; P04264	0	2	0.8523	0	1	1	738.397	1475.79	1475.79	1.39	0.00102	HCD (High Energy Collision Dissociation)	MS2	25.6538	30	39.1461	23683	01082019_Fusion_MASSFIITB_307198_S5.raw	F5			88	FALSE	54	36	4.64747e-08	0	6.131e-05	2144869888	39.32	Mascot (A5)			Mascot (A5)	cot (A5)	ot (A5)	ot (A5)	1.39
		FALSE	High	Sequest HT (A2)	Unambiguous	[R].FLEQQNQVLQTK.[W]		3	3	Q7Z794; P35908; P04264	Q7Z794; P35908; P04264	0	2	0.6423	0	1	1	738.399	1475.79	1475.79	3.69	0.00272	HCD (High Energy Collision Dissociation)	MS2	49.0239	30	39.1421	23619	01082019_Fusion_MASSFIITB_307198_S2.raw	F2		2.74		FALSE				0	8.297e-05	1974388608	39.31	Sequest HT (A2)			Sequest HT (A2	uest HT	est HT	est HT	3.69
		FALSE	High	Mascot (A5)	Unambiguous	[R].FLEQQNQVLQTK.[W]		3	3	Q7Z794; P35908; P04264	Q7Z794; P35908; P04264	0	2	0.8393	0	1	1	738.399	1475.79	1475.79	3.69	0.00272	HCD (High Energy Collision Dissociation)	MS2	49.0239	30	39.1421	23619	01082019_Fusion_MASSFIITB_307198_S2.raw	F2			56	FALSE	54	36	7.29305e-05	0	0.0001602	1974388608	39.31	Mascot (A5)			Mascot (A5)	cot (A5)	ot (A5)	ot (A5)	3.69
		FALSE	High	Mascot (A5)	Unambiguous	[R].FLEQQNQVLQTK.[W]		3	3	Q7Z794; P35908; P04264	Q7Z794; P35908; P04264	0	2	0.8667	0	1	1	738.398	1475.79	1475.79	2.02	0.00149	HCD (High Energy Collision Dissociation)	MS2	13.1405	30	39.1258	24014	01082019_Fusion_MASSFIITB_307198_S4.raw	F4			60	FALSE	54	36	3.23552e-05	0	0.00022	4519849984	39.37	Mascot (A5)			Mascot (A5)	cot (A5)	ot (A5)	ot (A5)	2.02
		FALSE	High	Mascot (A5)	Unambiguous	[R].FLEQQNQVLQTK.[W]		3	3	Q7Z794; P35908; P04264	Q7Z794; P35908; P04264	0	2	0.8966	0	1	1	738.396	1475.79	1475.79	0.2	0.00014	HCD (High Energy Collision Dissociation)	MS2	0	30	40.5034	24796	01082019_Fusion_MASSFIITB_307198_S2.raw	F2			58	FALSE	55	37	5.12324e-05	0	0.0002617	1974388608	39.31	Mascot (A5)			Mascot (A5)	cot (A5)	ot (A5)	ot (A5)	0.2
		FALSE	High	Sequest HT (A2)	Unambiguous	[R].FLEQQNQVLQTK.[W]		3	3	Q7Z794; P35908; P04264	Q7Z794; P35908; P04264	0	2	0.7108	0	1	1	738.396	1475.79	1475.79	0.2	0.00014	HCD (High Energy Collision Dissociation)	MS2	0	30	40.5034	24796	01082019_Fusion_MASSFIITB_307198_S2.raw	F2		3.25		FALSE				0	0.0002739	1974388608	39.31	Sequest HT (A2)			Sequest HT (A2	uest HT	est HT	est HT	0.2
		FALSE	High	Sequest HT (A2)	Selected	[R].FLEQQNQVLQTK.[W]		3	3	Q7Z794; P35908; P04264	Q7Z794; P35908; P04264	0	2	0.5758	0	1	1	738.397	1475.79	1475.79	0.79	0.00058	HCD (High Energy Collision Dissociation)	MS2	18.5533	23.5	41.3244	25893	01082019_Fusion_MASSFIITB_307198_S4.raw	F4		2.31		FALSE				0	0.0004261	52183980	40.91	Sequest HT (A2)			Sequest HT (A2	uest HT	est HT	est HT	0.79
		FALSE	High	Mascot (A5)	Selected	[R].FLEQQNQVLQTK.[W]		3	3	Q7Z794; P35908; P04264	Q7Z794; P35908; P04264	0	2	0.8615	0	1	1	738.396	1475.78	1475.79	-0.79	-0.00058	HCD (High Energy Collision Dissociation)	MS2	21.2248	30	39.8423	23212	01082019_Fusion_MASSFIITB_307198_S8.raw	F8			65	FALSE	54	37	1.07152e-05	0	0.0005233	549508352	39.38	Mascot (A5)			Mascot (A5)	cot (A5)	ot (A5)	ot (A5)	-0.79
		FALSE	High	Mascot (A5)	Selected	[R].FLEQQNQVLQTK.[W]		3	3	Q7Z794; P35908; P04264	Q7Z794; P35908; P04264	0	2	0.8769	0	1	1	738.397	1475.79	1475.79	1.2	0.00088	HCD (High Energy Collision Dissociation)	MS2	0	30	39.1645	22664	01082019_Fusion_MASSFIITB_307198_S8.raw	F8			65	FALSE	54	36	9.07312e-06	0	0.0005451	549508352	39.38	Mascot (A5)			Mascot (A5)	cot (A5)	ot (A5)	ot (A5)	1.2
		FALSE	High	Mascot (A5)	Selected	[R].FLEQQNQVLQTK.[W]		3	3	Q7Z794; P35908; P04264	Q7Z794; P35908; P04264	0	2	0.9062	0	1	1	738.397	1475.79	1475.79	0.49	0.00036	HCD (High Energy Collision Dissociation)	MS2	0	45.554	39.8162	21286	01082019_Fusion_MASSFIITB_307198_S7.raw	F7			64	FALSE	55	37	1.37998e-05	0	0.001629	227571456	39.32	Mascot (A5)			Mascot (A5)	cot (A5)	ot (A5)	ot (A5)	0.49
		FALSE	High	Sequest HT (A2)	Unambiguous	[R].FLEQQNQVLQTK.[W]		3	3	Q7Z794; P35908; P04264	Q7Z794; P35908; P04264	0	2	0.5763	0	1	1	738.399	1475.79	1475.79	3.1	0.00229	HCD (High Energy Collision Dissociation)	MS2	39.899	30	39.143	21857	01082019_Fusion_MASSFIITB_307198_S6.raw	F6		2.36		FALSE				0	0.001995	767441152	39.32	Sequest HT (A2)			Sequest HT (A2	uest HT	est HT	est HT	3.1
		FALSE	High	Mascot (A5)	Unambiguous	[R].FLEQQNQVLQTK.[W]		3	3	Q7Z794; P35908; P04264	Q7Z794; P35908; P04264	0	2	0.9123	0	1	1	738.399	1475.79	1475.79	3.1	0.00229	HCD (High Energy Collision Dissociation)	MS2	39.899	30	39.143	21857	01082019_Fusion_MASSFIITB_307198_S6.raw	F6			57	FALSE	54	36	5.65448e-05	0	0.002291	767441152	39.32	Mascot (A5)			Mascot (A5)	cot (A5)	ot (A5)	ot (A5)	3.1
		FALSE	High	Mascot (A5)	Selected	[R].FLEQQNQVLQTK.[W]		3	3	Q7Z794; P35908; P04264	Q7Z794; P35908; P04264	0	2	0.9167	0	1	1	738.397	1475.79	1475.79	0.32	0.00023	HCD (High Energy Collision Dissociation)	MS2	0	30	38.2268	23267	01082019_Fusion_MASSFIITB_307198_S4.raw	F4			60	FALSE	55	37	3.10353e-05	0	0.002738	4827066	38.3	Mascot (A5)			Mascot (A5)	cot (A5)	ot (A5)	ot (A5)	0.32
		FALSE	High	Sequest HT (A2)	Selected	[R].FLEQQNQVLQTK.[W]		3	3	Q7Z794; P35908; P04264	Q7Z794; P35908; P04264	0	2	0.6161	0	1	1	738.397	1475.79	1475.79	0.68	0.0005	HCD (High Energy Collision Dissociation)	MS2	26.245	9.054	39.5437	24599	01082019_Fusion_MASSFIITB_307198_S3.raw	F3		2.24		FALSE				0.002647	0.06091	3268648192	39.33	Sequest HT (A2)			Sequest HT (A2	uest HT	est HT	est HT	0.68
	FALSE	High	[R].EQIKSLNNQFASFIDKVR.[F]			FALSE	1	1	2	P04264	P04264 [182-199]	2	2137.14	0	110.8	275.8		436	77.4						Peak Found	High	Not Found	High	Peak Found	Not Found	Not Found	Not Found	Not Found	High	High	0	0	0.006728	5.492e-06	3.65	11		R.EQIKSLNNQFASFIDKVR.F	[182-199]
		Checked	Confidence	Identifying Node	PSM Ambiguity	Annotated Sequence	Modifications	# Protein Groups	# Proteins	Master Protein Accessions	Protein Accessions	# Missed Cleavages	Charge	DeltaScore	DeltaCn	Rank	Search Engine Rank	m/z [Da]	MH+ [Da]	Theo. MH+ [Da]	DeltaM [ppm]	Deltam/z [Da]	Activation Type	MS Order	Isolation Interference [%]	Ion Inject Time [ms]	RT [min]	First Scan	Spectrum File	File ID	Quan Info	XCorr	Ions Score	Contaminant	Identity Strict	Identity Relaxed	Expectation Value	Percolator q-Value	Percolator PEP	Precursor Abundance	Apex RT [min]	Identifying Node			Identifying No	ntifying	tifying	tifying	DeltaM [ppm]
		FALSE	High	Sequest HT (A2)	Selected	[R].EQIKSLNNQFASFIDKVR.[F]		1	1	P04264	P04264	2	4	0.6274	0	1	1	535.041	2137.14	2137.14	0.25	0.00013	HCD (High Energy Collision Dissociation)	MS2	21.23	26.55	54.4162	37325	01082019_Fusion_MASSFIITB_307198_S4.raw	F4		3.65		FALSE				0	5.492e-06	46766424	54.43	Sequest HT (A2)			Sequest HT (A2	uest HT	est HT	est HT	0.25
		FALSE	High	Sequest HT (A2)	Selected	[R].EQIKSLNNQFASFIDKVR.[F]		1	1	P04264	P04264	2	4	0.6133	0	1	1	535.04	2137.14	2137.14	-0.36	-0.00019	HCD (High Energy Collision Dissociation)	MS2	12.3005	23.5	54.0266	36926	01082019_Fusion_MASSFIITB_307198_S2.raw	F2		3.31		FALSE				0	5.456e-05			Sequest HT (A2)			Sequest HT (A2	uest HT	est HT	est HT	-0.36
	FALSE	High	[K].AEAESLYQSK.[Y]			FALSE	1	1	6	P04264	P04264 [367-376]	0	1125.54	0	89	88.9	141.4	141.3	89.2	97.7	132.5	120			High	High	Peak Found	High	High	High	Peak Found	Peak Found	Not Found	High	High	0	0	0.01529	0.00208	2.49	40		K.AEAESLYQSK.Y	[367-376]					132.5
		Checked	Confidence	Identifying Node	PSM Ambiguity	Annotated Sequence	Modifications	# Protein Groups	# Proteins	Master Protein Accessions	Protein Accessions	# Missed Cleavages	Charge	DeltaScore	DeltaCn	Rank	Search Engine Rank	m/z [Da]	MH+ [Da]	Theo. MH+ [Da]	DeltaM [ppm]	Deltam/z [Da]	Activation Type	MS Order	Isolation Interference [%]	Ion Inject Time [ms]	RT [min]	First Scan	Spectrum File	File ID	Quan Info	XCorr	Ions Score	Contaminant	Identity Strict	Identity Relaxed	Expectation Value	Percolator q-Value	Percolator PEP	Precursor Abundance	Apex RT [min]	Identifying Node			Identifying No	ntifying	tifying	tifying	DeltaM [ppm]
		FALSE	High	Sequest HT (A2)	Selected	[K].AEAESLYQSK.[Y]		1	1	P04264	P04264	0	2	0.5357	0	1	1	563.276	1125.55	1125.54	2.85	0.0016	HCD (High Energy Collision Dissociation)	MS2	31.0747	23.5	26.7672	12049	01082019_Fusion_MASSFIITB_307198_S6.raw	F6		2.24		FALSE				0	0.001089	114537848	26.63	Sequest HT (A2)			Sequest HT (A2	uest HT	est HT	est HT	2.85
		FALSE	High	Sequest HT (A2)	Selected	[K].AEAESLYQSK.[Y]		1	1	P04264	P04264	0	2	0.5778	0	1	1	563.275	1125.54	1125.54	0.47	0.00026	HCD (High Energy Collision Dissociation)	MS2	11.6917	4.778	26.6791	13126	01082019_Fusion_MASSFIITB_307198_S1.raw	F1		2.25		FALSE				0	0.001578	137712992	26.64	Sequest HT (A2)			Sequest HT (A2	uest HT	est HT	est HT	0.47
		FALSE	High	Sequest HT (A2)	Selected	[K].AEAESLYQSK.[Y]		1	1	P04264	P04264	0	2	0.5542	0	1	1	563.273	1125.54	1125.54	-2.26	-0.00127	HCD (High Energy Collision Dissociation)	MS2	11.6939	3.036	26.5679	13284	01082019_Fusion_MASSFIITB_307198_S5.raw	F5		2.49		FALSE				0	0.00208	307737504	26.63	Sequest HT (A2)			Sequest HT (A2	uest HT	est HT	est HT	-2.26
		FALSE	High	Sequest HT (A2)	Unambiguous	[K].AEAESLYQSK.[Y]		1	1	P04264	P04264	0	2	0.6292	0	1	1	563.273	1125.54	1125.54	-2.29	-0.00129	HCD (High Energy Collision Dissociation)	MS2	11.4387	1.032	26.5777	13445	01082019_Fusion_MASSFIITB_307198_S4.raw	F4		2.4		FALSE				0	0.005055	803002624	26.62	Sequest HT (A2)			Sequest HT (A2	uest HT	est HT	est HT	-2.29
		FALSE	High	Mascot (A5)	Selected	[K].AEAESLYQSK.[Y]		1	1	P04264	P04264	0	2	0.9259	0	1	1	563.274	1125.54	1125.54	-0.83	-0.00047	HCD (High Energy Collision Dissociation)	MS2	11.2335	2.591	26.6186	13033	01082019_Fusion_MASSFIITB_307198_S2.raw	F2			54	FALSE	51	33	5.53002e-05	0	0.005111	364403168	26.69	Mascot (A5)			Mascot (A5)	cot (A5)	ot (A5)	ot (A5)	-0.83
		FALSE	High	Mascot (A5)	Unambiguous	[K].AEAESLYQSK.[Y]		1	1	P04264	P04264	0	2	0.9828	0	1	1	563.273	1125.54	1125.54	-2.29	-0.00129	HCD (High Energy Collision Dissociation)	MS2	11.4387	1.032	26.5777	13445	01082019_Fusion_MASSFIITB_307198_S4.raw	F4			58	FALSE	51	33	2.40346e-05	0	0.007304	803002624	26.62	Mascot (A5)			Mascot (A5)	cot (A5)	ot (A5)	ot (A5)	-2.29
	FALSE	High	[K].AEAESLYQSKYEELQITAGR.[H]			FALSE	1	1	11	P04264	P04264 [367-386]	1	2286.12	0	92	186.3	144.5	283.9	105.9	69.7		17.7			High	High	High	High	High	High	Not Found	Peak Found	Not Found	High	High	0	0	0.0001037	1.64e-11	5.13	37		K.AEAESLYQSKYEELQITAGR.H	[367-386]
		Checked	Confidence	Identifying Node	PSM Ambiguity	Annotated Sequence	Modifications	# Protein Groups	# Proteins	Master Protein Accessions	Protein Accessions	# Missed Cleavages	Charge	DeltaScore	DeltaCn	Rank	Search Engine Rank	m/z [Da]	MH+ [Da]	Theo. MH+ [Da]	DeltaM [ppm]	Deltam/z [Da]	Activation Type	MS Order	Isolation Interference [%]	Ion Inject Time [ms]	RT [min]	First Scan	Spectrum File	File ID	Quan Info	XCorr	Ions Score	Contaminant	Identity Strict	Identity Relaxed	Expectation Value	Percolator q-Value	Percolator PEP	Precursor Abundance	Apex RT [min]	Identifying Node			Identifying No	ntifying	tifying	tifying	DeltaM [ppm]
		FALSE	High	Sequest HT (A2)	Unambiguous	[K].AEAESLYQSKYEELQITAGR.[H]		1	1	P04264	P04264	1	3	0.7057	0	1	1	762.714	2286.13	2286.12	0.57	0.00043	HCD (High Energy Collision Dissociation)	MS2	0	23.5	47.8467	31371	01082019_Fusion_MASSFIITB_307198_S2.raw	F2		5.13		FALSE				0	1.64e-11	137273664	47.95	Sequest HT (A2)			Sequest HT (A2	uest HT	est HT	est HT	0.57
		FALSE	High	Sequest HT (A2)	Unambiguous	[K].AEAESLYQSKYEELQITAGR.[H]		1	1	P04264	P04264	1	3	0.6324	0	1	1	762.714	2286.13	2286.12	0.55	0.00042	HCD (High Energy Collision Dissociation)	MS2	6.19768	25.47	47.921	31938	01082019_Fusion_MASSFIITB_307198_S3.raw	F3		3.7		FALSE				0	7.093e-09	119315256	48.1	Sequest HT (A2)			Sequest HT (A2	uest HT	est HT	est HT	0.55
		FALSE	High	Sequest HT (A2)	Selected	[K].AEAESLYQSKYEELQITAGR.[H]		1	1	P04264	P04264	1	3	0.5952	0	1	1	762.713	2286.12	2286.12	-0.57	-0.00044	HCD (High Energy Collision Dissociation)	MS2	9.12724	30	47.931	29429	01082019_Fusion_MASSFIITB_307198_S6.raw	F6		2.94		FALSE				0	9.736e-08	14685866	48.06	Sequest HT (A2)			Sequest HT (A2	uest HT	est HT	est HT	-0.57
		FALSE	High	Sequest HT (A2)	Unambiguous	[K].AEAESLYQSKYEELQITAGR.[H]		1	1	P04264	P04264	1	3	0.6406	0	1	1	762.713	2286.13	2286.12	0.38	0.00029	HCD (High Energy Collision Dissociation)	MS2	20.8612	30	47.9404	31282	01082019_Fusion_MASSFIITB_307198_S5.raw	F5		3.2		FALSE				0	1.319e-07	65674436	48.17	Sequest HT (A2)			Sequest HT (A2	uest HT	est HT	est HT	0.38
		FALSE	High	Mascot (A5)	Unambiguous	[K].AEAESLYQSKYEELQITAGR.[H]		1	1	P04264	P04264	1	3	1	0	1	1	762.714	2286.13	2286.12	0.57	0.00043	HCD (High Energy Collision Dissociation)	MS2	0	23.5	47.8467	31371	01082019_Fusion_MASSFIITB_307198_S2.raw	F2			74	FALSE	53	35	7.98565e-07	0	1.595e-07	137273664	47.95	Mascot (A5)			Mascot (A5)	cot (A5)	ot (A5)	ot (A5)	0.57
		FALSE	High	Sequest HT (A2)	Unambiguous	[K].AEAESLYQSKYEELQITAGR.[H]		1	1	P04264	P04264	1	3	0.632	0	1	1	762.713	2286.13	2286.12	0.41	0.00031	HCD (High Energy Collision Dissociation)	MS2	0	30	47.8595	31449	01082019_Fusion_MASSFIITB_307198_S1.raw	F1		3.37		FALSE				0	2.411e-07	25572684	47.99	Sequest HT (A2)			Sequest HT (A2	uest HT	est HT	est HT	0.41
		FALSE	High	Sequest HT (A2)	Unambiguous	[K].AEAESLYQSKYEELQITAGR.[H]		1	1	P04264	P04264	1	3	0.7151	0	1	1	762.712	2286.12	2286.12	-1.11	-0.00085	HCD (High Energy Collision Dissociation)	MS2	12.6578	17.554	47.8397	31587	01082019_Fusion_MASSFIITB_307198_S4.raw	F4		3.37		FALSE				0	8.102e-07	290155200	48.05	Sequest HT (A2)			Sequest HT (A2	uest HT	est HT	est HT	-1.11
		FALSE	High	Mascot (A5)	Unambiguous	[K].AEAESLYQSKYEELQITAGR.[H]		1	1	P04264	P04264	1	3	1	0	1	1	762.714	2286.13	2286.12	0.55	0.00042	HCD (High Energy Collision Dissociation)	MS2	6.19768	25.47	47.921	31938	01082019_Fusion_MASSFIITB_307198_S3.raw	F3			68	FALSE	53	35	3.61668e-06	0	8.64e-07	119315256	48.1	Mascot (A5)			Mascot (A5)	cot (A5)	ot (A5)	ot (A5)	0.55
		FALSE	High	Mascot (A5)	Unambiguous	[K].AEAESLYQSKYEELQITAGR.[H]		1	1	P04264	P04264	1	3	0.9836	0	1	1	762.712	2286.12	2286.12	-1.11	-0.00085	HCD (High Energy Collision Dissociation)	MS2	12.6578	17.554	47.8397	31587	01082019_Fusion_MASSFIITB_307198_S4.raw	F4			61	FALSE	53	35	1.90304e-05	0	2.191e-06	290155200	48.05	Mascot (A5)			Mascot (A5)	cot (A5)	ot (A5)	ot (A5)	-1.11
		FALSE	High	Mascot (A5)	Unambiguous	[K].AEAESLYQSKYEELQITAGR.[H]		1	1	P04264	P04264	1	3	1	0	1	1	762.713	2286.13	2286.12	0.38	0.00029	HCD (High Energy Collision Dissociation)	MS2	20.8612	30	47.9404	31282	01082019_Fusion_MASSFIITB_307198_S5.raw	F5			53	FALSE	53	35	0.000100321	0	2.402e-05	65674436	48.17	Mascot (A5)			Mascot (A5)	cot (A5)	ot (A5)	ot (A5)	0.38
		FALSE	High	Mascot (A5)	Unambiguous	[K].AEAESLYQSKYEELQITAGR.[H]		1	1	P04264	P04264	1	3	0.9839	0	1	1	762.713	2286.13	2286.12	0.41	0.00031	HCD (High Energy Collision Dissociation)	MS2	0	30	47.8595	31449	01082019_Fusion_MASSFIITB_307198_S1.raw	F1			62	FALSE	53	35	1.32548e-05	0	2.845e-05	25572684	47.99	Mascot (A5)			Mascot (A5)	cot (A5)	ot (A5)	ot (A5)	0.41
	FALSE	High	[K].AQYEDIAQK.[S]			FALSE	1	1	2	P04264	P04264 [356-364]	0	1065.52	0	89.2	90.1	129.5	164.6	96.2	91.1	129.4	110			Peak Found	Peak Found	High	High	Peak Found	Peak Found	Peak Found	Peak Found	Not Found	High	High	0	0.0002645	0.004551	0.01617	2.04	35		K.AQYEDIAQK.S	[356-364]					129.4
		Checked	Confidence	Identifying Node	PSM Ambiguity	Annotated Sequence	Modifications	# Protein Groups	# Proteins	Master Protein Accessions	Protein Accessions	# Missed Cleavages	Charge	DeltaScore	DeltaCn	Rank	Search Engine Rank	m/z [Da]	MH+ [Da]	Theo. MH+ [Da]	DeltaM [ppm]	Deltam/z [Da]	Activation Type	MS Order	Isolation Interference [%]	Ion Inject Time [ms]	RT [min]	First Scan	Spectrum File	File ID	Quan Info	XCorr	Ions Score	Contaminant	Identity Strict	Identity Relaxed	Expectation Value	Percolator q-Value	Percolator PEP	Precursor Abundance	Apex RT [min]	Identifying Node			Identifying No	ntifying	tifying	tifying	DeltaM [ppm]
		FALSE	High	Mascot (A5)	Selected	[K].AQYEDIAQK.[S]		1	1	P04264	P04264	0	2	0.8814	0	1	1	533.265	1065.52	1065.52	2	0.00107	HCD (High Energy Collision Dissociation)	MS2	0	30	26.1695	13306	01082019_Fusion_MASSFIITB_307198_S3.raw	F3			59	FALSE	53	35	2.7753e-05	0	0.005725	2314277632	26.42	Mascot (A5)			Mascot (A5)	cot (A5)	ot (A5)	ot (A5)	2
		FALSE	High	Mascot (A5)	Selected	[K].AQYEDIAQK.[S]		1	1	P04264	P04264	0	2	0.8769	0	1	1	533.264	1065.52	1065.52	-0.65	-0.00035	HCD (High Energy Collision Dissociation)	MS2	0.110569	0.18	26.3444	13257	01082019_Fusion_MASSFIITB_307198_S4.raw	F4			65	FALSE	53	35	6.1588e-06	0.001748	0.04341	3640973056	26.38	Mascot (A5)			Mascot (A5)	cot (A5)	ot (A5)	ot (A5)	-0.65
	FALSE	High	[K].AQYEDIAQKSK.[A]			FALSE	1	1	3	P04264	P04264 [356-366]	1	1280.65	0	62.6	164.3	113.6	67.2	84.5	114.4	93.1	200.4			Peak Found	High	High	Peak Found	High	Peak Found	Peak Found	Peak Found	Not Found	High	High	0	0	0.001005	0.0005955	3.08	39		K.AQYEDIAQKSK.A	[356-366]					93.1
		Checked	Confidence	Identifying Node	PSM Ambiguity	Annotated Sequence	Modifications	# Protein Groups	# Proteins	Master Protein Accessions	Protein Accessions	# Missed Cleavages	Charge	DeltaScore	DeltaCn	Rank	Search Engine Rank	m/z [Da]	MH+ [Da]	Theo. MH+ [Da]	DeltaM [ppm]	Deltam/z [Da]	Activation Type	MS Order	Isolation Interference [%]	Ion Inject Time [ms]	RT [min]	First Scan	Spectrum File	File ID	Quan Info	XCorr	Ions Score	Contaminant	Identity Strict	Identity Relaxed	Expectation Value	Percolator q-Value	Percolator PEP	Precursor Abundance	Apex RT [min]	Identifying Node			Identifying No	ntifying	tifying	tifying	DeltaM [ppm]
		FALSE	High	Sequest HT (A2)	Selected	[K].AQYEDIAQKSK.[A]		1	1	P04264	P04264	1	3	0.6747	0	1	1	427.553	1280.65	1280.65	-1.86	-0.00079	HCD (High Energy Collision Dissociation)	MS2	6.38788	30	22.0148	9810	01082019_Fusion_MASSFIITB_307198_S3.raw	F3		2.89		FALSE				0	0.0001085	40930872	22.11	Sequest HT (A2)			Sequest HT (A2	uest HT	est HT	est HT	-1.86
		FALSE	High	Sequest HT (A2)	Selected	[K].AQYEDIAQKSK.[A]		1	1	P04264	P04264	1	3	0.6667	0	1	1	427.554	1280.65	1280.65	-0.42	-0.00018	HCD (High Energy Collision Dissociation)	MS2	0	30	22.0815	9675	01082019_Fusion_MASSFIITB_307198_S5.raw	F5		2.82		FALSE				0	0.0002488	22866024	22.14	Sequest HT (A2)			Sequest HT (A2	uest HT	est HT	est HT	-0.42
		FALSE	High	Sequest HT (A2)	Selected	[K].AQYEDIAQKSK.[A]		1	1	P04264	P04264	1	3	0.6753	0	1	1	427.553	1280.65	1280.65	-2	-0.00085	HCD (High Energy Collision Dissociation)	MS2	45.6726	30	21.9029	9268	01082019_Fusion_MASSFIITB_307198_S2.raw	F2		3.08		FALSE				0	0.0005955	52834324	22.04	Sequest HT (A2)			Sequest HT (A2	uest HT	est HT	est HT	-2
	FALSE	High	[K].IEISELNR.[V]			FALSE	2	2	6	P35908; P04264	P35908 [394-401]; P04264 [396-403]	0	973.531	0	132.2	87.9	111.5	77.4	98.4	121.6	127.4	128.9	14.7	Shared	High	Peak Found	High	Peak Found	Peak Found	High	Peak Found	High	Peak Found	High	High	0	0.004268	0.02313	0.07395	2.42	31		K.IEISELNR.V	[396-403]					127.4
		Checked	Confidence	Identifying Node	PSM Ambiguity	Annotated Sequence	Modifications	# Protein Groups	# Proteins	Master Protein Accessions	Protein Accessions	# Missed Cleavages	Charge	DeltaScore	DeltaCn	Rank	Search Engine Rank	m/z [Da]	MH+ [Da]	Theo. MH+ [Da]	DeltaM [ppm]	Deltam/z [Da]	Activation Type	MS Order	Isolation Interference [%]	Ion Inject Time [ms]	RT [min]	First Scan	Spectrum File	File ID	Quan Info	XCorr	Ions Score	Contaminant	Identity Strict	Identity Relaxed	Expectation Value	Percolator q-Value	Percolator PEP	Precursor Abundance	Apex RT [min]	Identifying Node			Identifying No	ntifying	tifying	tifying	DeltaM [ppm]
		FALSE	High	Mascot (A5)	Selected	[K].IEISELNR.[V]		2	2	P35908; P04264	P35908; P04264	0	2	0.3	0	1	1	487.269	973.531	973.531	-0.75	-0.00036	HCD (High Energy Collision Dissociation)	MS2	34.8459	24.246	37.9696	22674	01082019_Fusion_MASSFIITB_307198_S1.raw	F1			60	FALSE	54	36	2.44218e-05	0	0.005489	652005952	38.14	Mascot (A5)			Mascot (A5)	cot (A5)	ot (A5)	ot (A5)	-0.75
		FALSE	High	Mascot (A5)	Selected	[K].IEISELNR.[V]		2	2	P35908; P04264	P35908; P04264	0	2	0.2951	0	1	1	487.269	973.53	973.531	-1.02	-0.0005	HCD (High Energy Collision Dissociation)	MS2	13.0349	30	37.9771	20894	01082019_Fusion_MASSFIITB_307198_S6.raw	F6			61	FALSE	54	36	2.02198e-05	0	0.006111	454446880	38.15	Mascot (A5)			Mascot (A5)	cot (A5)	ot (A5)	ot (A5)	-1.02
		FALSE	High	Sequest HT (A2)	Unambiguous	[K].IEISELNR.[V]		2	2	P35908; P04264	P35908; P04264	0	2	0.2137	0	1	1	487.269	973.53	973.531	-1.38	-0.00067	HCD (High Energy Collision Dissociation)	MS2	25.1388	30	37.9882	21720	01082019_Fusion_MASSFIITB_307198_S8.raw	F8		2.34		FALSE				0	0.01296	309229216	38.15	Sequest HT (A2)			Sequest HT (A2	uest HT	est HT	est HT	-1.38
		FALSE	High	Sequest HT (A2)	Selected	[K].IEISELNR.[V]		2	2	P35908; P04264	P35908; P04264	0	2	0.2199	0	1	1	487.269	973.531	973.531	0.08	4e-05	HCD (High Energy Collision Dissociation)	MS2	26.0252	24.961	38.0059	23260	01082019_Fusion_MASSFIITB_307198_S3.raw	F3		2.41		FALSE				0.0004992	0.01981	1632654976	38.19	Sequest HT (A2)			Sequest HT (A2	uest HT	est HT	est HT	0.08
		FALSE	High	Mascot (A5)	Unambiguous	[K].IEISELNR.[V]		2	2	P35908; P04264	P35908; P04264	0	2	0.2951	0	1	1	487.269	973.53	973.531	-1.38	-0.00067	HCD (High Energy Collision Dissociation)	MS2	25.1388	30	37.9882	21720	01082019_Fusion_MASSFIITB_307198_S8.raw	F8			61	FALSE	54	36	2.0309e-05	0	0.0211	309229216	38.15	Mascot (A5)			Mascot (A5)	cot (A5)	ot (A5)	ot (A5)	-1.38
		FALSE	High	Sequest HT (A2)	Selected	[K].IEISELNR.[V]		2	2	P35908; P04264	P35908; P04264	0	2	0.2438	0	1	1	487.269	973.531	973.531	-0.09	-4e-05	HCD (High Energy Collision Dissociation)	MS2	48.3369	23.5	38.6849	23851	01082019_Fusion_MASSFIITB_307198_S3.raw	F3		2.42		FALSE				0.004268	0.07395	1632654976	38.19	Sequest HT (A2)			Sequest HT (A2	uest HT	est HT	est HT	-0.09
	FALSE	High	[R].LDSELKNMQDMVEDYR.[N]	2xOxidation [M8; M11]		FALSE	1	1	1	P04264	P04264 [252-267]	1	2017.88	0	118.9	116.2	97.5	93.8	137	102.7	98.7	135.2			Peak Found	High	Peak Found	Peak Found	Peak Found	Peak Found	Peak Found	Peak Found	Not Found	High	High	0	0	0.01271	0.00185	2.93	14	2xOxidation [M8; M11]	R.LDSELKNMQDMVEDYR.N	[252-267]	2xOxidation [M	xidation	idation	idation	98.7
		Checked	Confidence	Identifying Node	PSM Ambiguity	Annotated Sequence	Modifications	# Protein Groups	# Proteins	Master Protein Accessions	Protein Accessions	# Missed Cleavages	Charge	DeltaScore	DeltaCn	Rank	Search Engine Rank	m/z [Da]	MH+ [Da]	Theo. MH+ [Da]	DeltaM [ppm]	Deltam/z [Da]	Activation Type	MS Order	Isolation Interference [%]	Ion Inject Time [ms]	RT [min]	First Scan	Spectrum File	File ID	Quan Info	XCorr	Ions Score	Contaminant	Identity Strict	Identity Relaxed	Expectation Value	Percolator q-Value	Percolator PEP	Precursor Abundance	Apex RT [min]	Identifying Node			Identifying No	ntifying	tifying	tifying	DeltaM [ppm]
		FALSE	High	Sequest HT (A2)	Selected	[R].LDSELKNmQDmVEDYR.[N]	M8(Oxidation); M11(Oxidation)	1	1	P04264	P04264	1	3	0.5017	0	1	1	673.3	2017.89	2017.88	1.26	0.00085	HCD (High Energy Collision Dissociation)	MS2	33.8761	23.5	35.2087	20237	01082019_Fusion_MASSFIITB_307198_S2.raw	F2		2.93		FALSE				0	0.00185	24893868	35.36	Sequest HT (A2)			Sequest HT (A2	uest HT	est HT	est HT	1.26
	FALSE	High	[R].LLRDYQELMNTK.[L]			FALSE	1	1	1	P04264	P04264 [461-472]	1	1523.79	0	127.6	246.7	190.7	54.1	280.9						Peak Found	High	Peak Found	Peak Found	Peak Found	Not Found	Not Found	Not Found	Not Found	High	High	0	0	0.02088	0.002167	3.42	17		R.LLRDYQELMNTK.L	[461-472]
		Checked	Confidence	Identifying Node	PSM Ambiguity	Annotated Sequence	Modifications	# Protein Groups	# Proteins	Master Protein Accessions	Protein Accessions	# Missed Cleavages	Charge	DeltaScore	DeltaCn	Rank	Search Engine Rank	m/z [Da]	MH+ [Da]	Theo. MH+ [Da]	DeltaM [ppm]	Deltam/z [Da]	Activation Type	MS Order	Isolation Interference [%]	Ion Inject Time [ms]	RT [min]	First Scan	Spectrum File	File ID	Quan Info	XCorr	Ions Score	Contaminant	Identity Strict	Identity Relaxed	Expectation Value	Percolator q-Value	Percolator PEP	Precursor Abundance	Apex RT [min]	Identifying Node			Identifying No	ntifying	tifying	tifying	DeltaM [ppm]
		FALSE	High	Sequest HT (A2)	Selected	[R].LLRDYQELMNTK.[L]		1	1	P04264	P04264	1	3	0.3187	0	1	1	508.601	1523.79	1523.79	0.19	0.0001	HCD (High Energy Collision Dissociation)	MS2	48.9075	23.5	43.1393	27105	01082019_Fusion_MASSFIITB_307198_S2.raw	F2		3.42		FALSE				0	0.002167	20721644	43.15	Sequest HT (A2)			Sequest HT (A2	uest HT	est HT	est HT	0.19
	FALSE	High	[R].LLRDYQELMNTK.[L]	1xOxidation [M9]		FALSE	1	1	2	P04264	P04264 [461-472]	1	1539.78	0		48.6	139.4	142	179.4	128.3	86.7	175.6			Not Found	Peak Found	Peak Found	High	High	Peak Found	Peak Found	Peak Found	Not Found	High	High	0	0	0.01905	0.003653	3.04	18	1xOxidation [M9]	R.LLRDYQELMNTK.L	[461-472]	1xOxidation [M	xidation	idation	idation	86.7
		Checked	Confidence	Identifying Node	PSM Ambiguity	Annotated Sequence	Modifications	# Protein Groups	# Proteins	Master Protein Accessions	Protein Accessions	# Missed Cleavages	Charge	DeltaScore	DeltaCn	Rank	Search Engine Rank	m/z [Da]	MH+ [Da]	Theo. MH+ [Da]	DeltaM [ppm]	Deltam/z [Da]	Activation Type	MS Order	Isolation Interference [%]	Ion Inject Time [ms]	RT [min]	First Scan	Spectrum File	File ID	Quan Info	XCorr	Ions Score	Contaminant	Identity Strict	Identity Relaxed	Expectation Value	Percolator q-Value	Percolator PEP	Precursor Abundance	Apex RT [min]	Identifying Node			Identifying No	ntifying	tifying	tifying	DeltaM [ppm]
		FALSE	High	Sequest HT (A2)	Selected	[R].LLRDYQELmNTK.[L]	M9(Oxidation)	1	1	P04264	P04264	1	3	0.4507	0	1	1	513.933	1539.78	1539.78	-0.3	-0.00016	HCD (High Energy Collision Dissociation)	MS2	46.3591	30	33.9306	19312	01082019_Fusion_MASSFIITB_307198_S5.raw	F5		3.04		FALSE				0	0.003653	18187066	33.85	Sequest HT (A2)			Sequest HT (A2	uest HT	est HT	est HT	-0.3
		FALSE	High	Sequest HT (A2)	Selected	[R].LLRDYQELmNTK.[L]	M9(Oxidation)	1	1	P04264	P04264	1	3	0.4409	0	1	1	513.933	1539.78	1539.78	0.21	0.00011	HCD (High Energy Collision Dissociation)	MS2	39.6593	25.412	33.8916	19616	01082019_Fusion_MASSFIITB_307198_S4.raw	F4		2.79		FALSE				0	0.006665	23707782	33.79	Sequest HT (A2)			Sequest HT (A2	uest HT	est HT	est HT	0.21
	FALSE	High	[K].LNDLEDALQQAK.[E]			FALSE	1	1	14	P04264	P04264 [444-455]	0	1357.7	0	195.8	126.8	147.3	78.9	90	97.5	74.8	85.4	3.4		High	High	High	Peak Found	High	High	Peak Found	High	Peak Found	High	High	0	0	0.00238	1.282e-06	3.49	56		K.LNDLEDALQQAK.E	[444-455]					74.8
		Checked	Confidence	Identifying Node	PSM Ambiguity	Annotated Sequence	Modifications	# Protein Groups	# Proteins	Master Protein Accessions	Protein Accessions	# Missed Cleavages	Charge	DeltaScore	DeltaCn	Rank	Search Engine Rank	m/z [Da]	MH+ [Da]	Theo. MH+ [Da]	DeltaM [ppm]	Deltam/z [Da]	Activation Type	MS Order	Isolation Interference [%]	Ion Inject Time [ms]	RT [min]	First Scan	Spectrum File	File ID	Quan Info	XCorr	Ions Score	Contaminant	Identity Strict	Identity Relaxed	Expectation Value	Percolator q-Value	Percolator PEP	Precursor Abundance	Apex RT [min]	Identifying Node			Identifying No	ntifying	tifying	tifying	DeltaM [ppm]
		FALSE	High	Sequest HT (A2)	Unambiguous	[K].LNDLEDALQQAK.[E]		1	1	P04264	P04264	0	2	0.6592	0	1	1	679.352	1357.7	1357.7	-0.03	-2e-05	HCD (High Energy Collision Dissociation)	MS2	6.61082	12.443	47.985	31497	01082019_Fusion_MASSFIITB_307198_S2.raw	F2		3.11		FALSE				0	9.932e-07	376132160	48.15	Sequest HT (A2)			Sequest HT (A2	uest HT	est HT	est HT	-0.03
		FALSE	High	Sequest HT (A2)	Unambiguous	[K].LNDLEDALQQAK.[E]		1	1	P04264	P04264	0	2	0.6628	0	1	1	679.352	1357.7	1357.7	0.02	1e-05	HCD (High Energy Collision Dissociation)	MS2	5.56537	27.926	47.9987	29492	01082019_Fusion_MASSFIITB_307198_S6.raw	F6		3.44		FALSE				0	1.279e-06	82719400	48.12	Sequest HT (A2)			Sequest HT (A2	uest HT	est HT	est HT	0.02
		FALSE	High	Sequest HT (A2)	Unambiguous	[K].LNDLEDALQQAK.[E]		1	1	P04264	P04264	0	2	0.6705	0	1	1	679.351	1357.7	1357.7	-0.4	-0.00027	HCD (High Energy Collision Dissociation)	MS2	15.6803	30	47.8951	31480	01082019_Fusion_MASSFIITB_307198_S1.raw	F1		3.49		FALSE				0	1.282e-06	219170912	48.07	Sequest HT (A2)			Sequest HT (A2	uest HT	est HT	est HT	-0.4
		FALSE	High	Sequest HT (A2)	Unambiguous	[K].LNDLEDALQQAK.[E]		1	1	P04264	P04264	0	2	0.7218	0	1	1	679.352	1357.7	1357.7	0.96	0.00065	HCD (High Energy Collision Dissociation)	MS2	0	30	48.0054	31341	01082019_Fusion_MASSFIITB_307198_S5.raw	F5		2.84		FALSE				0	1.406e-06	224769168	48.22	Sequest HT (A2)			Sequest HT (A2	uest HT	est HT	est HT	0.96
		FALSE	High	Sequest HT (A2)	Unambiguous	[K].LNDLEDALQQAK.[E]		1	1	P04264	P04264	0	2	0.5965	0	1	1	679.352	1357.7	1357.7	0.54	0.00037	HCD (High Energy Collision Dissociation)	MS2	0	26.592	49.3708	33212	01082019_Fusion_MASSFIITB_307198_S3.raw	F3		3.42		FALSE				0	5.117e-06	15290702	49.77	Sequest HT (A2)			Sequest HT (A2	uest HT	est HT	est HT	0.54
		FALSE	High	Sequest HT (A2)	Unambiguous	[K].LNDLEDALQQAK.[E]		1	1	P04264	P04264	0	2	0.64	0	1	1	679.353	1357.7	1357.7	2.01	0.00137	HCD (High Energy Collision Dissociation)	MS2	17.1082	30	47.9984	32008	01082019_Fusion_MASSFIITB_307198_S3.raw	F3		3.25		FALSE				0	6.794e-06	474424960	48.2	Sequest HT (A2)			Sequest HT (A2	uest HT	est HT	est HT	2.01
		FALSE	High	Mascot (A5)	Unambiguous	[K].LNDLEDALQQAK.[E]		1	1	P04264	P04264	0	2	0.9394	0	1	1	679.352	1357.7	1357.7	-0.03	-2e-05	HCD (High Energy Collision Dissociation)	MS2	6.61082	12.443	47.985	31497	01082019_Fusion_MASSFIITB_307198_S2.raw	F2			99	FALSE	54	36	2.9518e-09	0	9.163e-06	376132160	48.15	Mascot (A5)			Mascot (A5)	cot (A5)	ot (A5)	ot (A5)	-0.03
		FALSE	High	Sequest HT (A2)	Unambiguous	[K].LNDLEDALQQAK.[E]		1	1	P04264	P04264	0	2	0.6447	0	1	1	679.352	1357.7	1357.7	0.75	0.00051	HCD (High Energy Collision Dissociation)	MS2	29.1499	30	47.9478	30132	01082019_Fusion_MASSFIITB_307198_S8.raw	F8		2.73		FALSE				0	1.325e-05	46545640	48.13	Sequest HT (A2)			Sequest HT (A2	uest HT	est HT	est HT	0.75
		FALSE	High	Mascot (A5)	Unambiguous	[K].LNDLEDALQQAK.[E]		1	1	P04264	P04264	0	2	0.9294	0	1	1	679.352	1357.7	1357.7	0.96	0.00065	HCD (High Energy Collision Dissociation)	MS2	0	30	48.0054	31341	01082019_Fusion_MASSFIITB_307198_S5.raw	F5			85	FALSE	53	36	7.66172e-08	0	1.485e-05	224769168	48.22	Mascot (A5)			Mascot (A5)	cot (A5)	ot (A5)	ot (A5)	0.96
		FALSE	High	Mascot (A5)	Unambiguous	[K].LNDLEDALQQAK.[E]		1	1	P04264	P04264	0	2	0.9655	0	1	1	679.353	1357.7	1357.7	2.01	0.00137	HCD (High Energy Collision Dissociation)	MS2	17.1082	30	47.9984	32008	01082019_Fusion_MASSFIITB_307198_S3.raw	F3			87	FALSE	54	36	5.88802e-08	0	1.619e-05	474424960	48.2	Mascot (A5)			Mascot (A5)	cot (A5)	ot (A5)	ot (A5)	2.01
		FALSE	High	Mascot (A5)	Unambiguous	[K].LNDLEDALQQAK.[E]		1	1	P04264	P04264	0	2	0.8919	0	1	1	679.352	1357.7	1357.7	0.54	0.00037	HCD (High Energy Collision Dissociation)	MS2	0	26.592	49.3708	33212	01082019_Fusion_MASSFIITB_307198_S3.raw	F3			74	FALSE	54	36	8.94413e-07	0	1.768e-05	15290702	49.77	Mascot (A5)			Mascot (A5)	cot (A5)	ot (A5)	ot (A5)	0.54
		FALSE	High	Mascot (A5)	Unambiguous	[K].LNDLEDALQQAK.[E]		1	1	P04264	P04264	0	2	0.9457	0	1	1	679.352	1357.7	1357.7	0.02	1e-05	HCD (High Energy Collision Dissociation)	MS2	5.56537	27.926	47.9987	29492	01082019_Fusion_MASSFIITB_307198_S6.raw	F6			92	FALSE	54	36	1.44573e-08	0	1.906e-05	82719400	48.12	Mascot (A5)			Mascot (A5)	cot (A5)	ot (A5)	ot (A5)	0.02
		FALSE	High	Mascot (A5)	Unambiguous	[K].LNDLEDALQQAK.[E]		1	1	P04264	P04264	0	2	0.9286	0	1	1	679.351	1357.7	1357.7	-0.4	-0.00027	HCD (High Energy Collision Dissociation)	MS2	15.6803	30	47.8951	31480	01082019_Fusion_MASSFIITB_307198_S1.raw	F1			84	FALSE	54	36	1.1591e-07	0	3.874e-05	219170912	48.07	Mascot (A5)			Mascot (A5)	cot (A5)	ot (A5)	ot (A5)	-0.4
		FALSE	High	Mascot (A5)	Unambiguous	[K].LNDLEDALQQAK.[E]		1	1	P04264	P04264	0	2	0.9195	0	1	1	679.352	1357.7	1357.7	0.75	0.00051	HCD (High Energy Collision Dissociation)	MS2	29.1499	30	47.9478	30132	01082019_Fusion_MASSFIITB_307198_S8.raw	F8			87	FALSE	53	36	4.77318e-08	0	0.0002069	46545640	48.13	Mascot (A5)			Mascot (A5)	cot (A5)	ot (A5)	ot (A5)	0.75
	FALSE	High	[K].LNDLEDALQQAKEDLAR.[L]			FALSE	1	1	4	P04264	P04264 [444-460]	1	1941.99	0	203.5	185.7	66.9	130.3	160.8	152.8					High	High	High	High	Peak Found	Peak Found	Not Found	Not Found	Not Found	High	High	0	0	0.005506	1.572e-06	3.69	24		K.LNDLEDALQQAKEDLAR.L	[444-460]
		Checked	Confidence	Identifying Node	PSM Ambiguity	Annotated Sequence	Modifications	# Protein Groups	# Proteins	Master Protein Accessions	Protein Accessions	# Missed Cleavages	Charge	DeltaScore	DeltaCn	Rank	Search Engine Rank	m/z [Da]	MH+ [Da]	Theo. MH+ [Da]	DeltaM [ppm]	Deltam/z [Da]	Activation Type	MS Order	Isolation Interference [%]	Ion Inject Time [ms]	RT [min]	First Scan	Spectrum File	File ID	Quan Info	XCorr	Ions Score	Contaminant	Identity Strict	Identity Relaxed	Expectation Value	Percolator q-Value	Percolator PEP	Precursor Abundance	Apex RT [min]	Identifying Node			Identifying No	ntifying	tifying	tifying	DeltaM [ppm]
		FALSE	High	Sequest HT (A2)	Selected	[K].LNDLEDALQQAKEDLAR.[L]		1	1	P04264	P04264	1	3	0.5745	0	1	1	648.001	1941.99	1941.99	0.19	0.00012	HCD (High Energy Collision Dissociation)	MS2	24.0889	22.804	63.4674	45428	01082019_Fusion_MASSFIITB_307198_S2.raw	F2		3.69		FALSE				0	1.572e-06	45307608	63.63	Sequest HT (A2)			Sequest HT (A2	uest HT	est HT	est HT	0.19
		FALSE	High	Sequest HT (A2)	Selected	[K].LNDLEDALQQAKEDLAR.[L]		1	1	P04264	P04264	1	3	0.5312	0	1	1	648.001	1941.99	1941.99	-0.31	-0.0002	HCD (High Energy Collision Dissociation)	MS2	29.0666	30	63.4099	45423	01082019_Fusion_MASSFIITB_307198_S1.raw	F1		3.2		FALSE				0	7.182e-06	18734342	63.59	Sequest HT (A2)			Sequest HT (A2	uest HT	est HT	est HT	-0.31
		FALSE	High	Sequest HT (A2)	Selected	[K].LNDLEDALQQAKEDLAR.[L]		1	1	P04264	P04264	1	3	0.4393	0	1	1	648	1941.99	1941.99	-0.64	-0.00041	HCD (High Energy Collision Dissociation)	MS2	25.7948	30	63.5003	45298	01082019_Fusion_MASSFIITB_307198_S4.raw	F4		3.05		FALSE				0	5.687e-05	44080508	63.77	Sequest HT (A2)			Sequest HT (A2	uest HT	est HT	est HT	-0.64
		FALSE	High	Sequest HT (A2)	Selected	[K].LNDLEDALQQAKEDLAR.[L]		1	1	P04264	P04264	1	3	0.4387	0	1	1	648.001	1941.99	1941.99	-0.19	-0.00012	HCD (High Energy Collision Dissociation)	MS2	19.5755	25.487	63.584	45818	01082019_Fusion_MASSFIITB_307198_S3.raw	F3		3.26		FALSE				0	0.0001419	18298792	63.64	Sequest HT (A2)			Sequest HT (A2	uest HT	est HT	est HT	-0.19
	FALSE	High	[R].GSGGGSSGGSIGGR.[G]			FALSE	1	1	1	P04264	P04264 [603-616]	0	1092.5	0	63.7	81.4	109.2	143.9	104.6	109.2	150.5	137.5			Peak Found	Peak Found	Peak Found	Peak Found	High	Peak Found	Peak Found	Peak Found	Not Found	High	High	0	0.001899	0.01939	0.04997	1.96	62		R.GSGGGSSGGSIGGR.G	[603-616]					150.5
		Checked	Confidence	Identifying Node	PSM Ambiguity	Annotated Sequence	Modifications	# Protein Groups	# Proteins	Master Protein Accessions	Protein Accessions	# Missed Cleavages	Charge	DeltaScore	DeltaCn	Rank	Search Engine Rank	m/z [Da]	MH+ [Da]	Theo. MH+ [Da]	DeltaM [ppm]	Deltam/z [Da]	Activation Type	MS Order	Isolation Interference [%]	Ion Inject Time [ms]	RT [min]	First Scan	Spectrum File	File ID	Quan Info	XCorr	Ions Score	Contaminant	Identity Strict	Identity Relaxed	Expectation Value	Percolator q-Value	Percolator PEP	Precursor Abundance	Apex RT [min]	Identifying Node			Identifying No	ntifying	tifying	tifying	DeltaM [ppm]
		FALSE	High	Mascot (A5)	Selected	[R].GSGGGSSGGSIGGR.[G]		1	1	P04264	P04264	0	2	0.9677	0	1	1	546.755	1092.5	1092.5	-0.01	-1e-05	HCD (High Energy Collision Dissociation)	MS2	7.0102	30	16.0049	4531	01082019_Fusion_MASSFIITB_307198_S5.raw	F5			62	FALSE	51	33	8.78722e-06	0	0.01939	1.2826e+06	16.04	Mascot (A5)			Mascot (A5)	cot (A5)	ot (A5)	ot (A5)	-0.01
	FALSE	High	[R].GSGGGSSGGSIGGRGSSSGGVK.[S]			FALSE	1	1	1	P04264	P04264 [603-624]	1	1751.83	0	70.7	42.1	29.5	179.5	67.5	72.7	269.8	168.3			Peak Found	Peak Found	Peak Found	High	Peak Found	Peak Found	Peak Found	Peak Found	Not Found	High	High	0	0	0.004675	0.00161	2.86	48		R.GSGGGSSGGSIGGRGSSSGGVK.S	[603-624]					269.8
		Checked	Confidence	Identifying Node	PSM Ambiguity	Annotated Sequence	Modifications	# Protein Groups	# Proteins	Master Protein Accessions	Protein Accessions	# Missed Cleavages	Charge	DeltaScore	DeltaCn	Rank	Search Engine Rank	m/z [Da]	MH+ [Da]	Theo. MH+ [Da]	DeltaM [ppm]	Deltam/z [Da]	Activation Type	MS Order	Isolation Interference [%]	Ion Inject Time [ms]	RT [min]	First Scan	Spectrum File	File ID	Quan Info	XCorr	Ions Score	Contaminant	Identity Strict	Identity Relaxed	Expectation Value	Percolator q-Value	Percolator PEP	Precursor Abundance	Apex RT [min]	Identifying Node			Identifying No	ntifying	tifying	tifying	DeltaM [ppm]
		FALSE	High	Sequest HT (A2)	Selected	[R].GSGGGSSGGSIGGRGSSSGGVK.[S]		1	1	P04264	P04264	1	3	0.521	0	1	1	584.614	1751.83	1751.83	0.29	0.00017	HCD (High Energy Collision Dissociation)	MS2	19.5433	30	16.1284	4767	01082019_Fusion_MASSFIITB_307198_S4.raw	F4		2.86		FALSE				0	0.00161	24555622	16.17	Sequest HT (A2)			Sequest HT (A2	uest HT	est HT	est HT	0.29
	FALSE	High	[R].GSYGSGGSSYGSGGGSYGSGGGGGGHGSYGSGSSSGGYR.[G]			FALSE	1	1	15	P04264	P04264 [550-588]	0	3312.31	0	99.1	113.3	106.9	153.9	118.7	80.5	80.1	119.6	28		High	High	High	High	High	High	Peak Found	Peak Found	Peak Found	High	High	0	0	7.055e-05	6.785e-06	5.62	85		R.GSYGSGGSSYGSGGGSYGSGGGGGGHGSYGSGSSSGGYR.G	[550-588]					80.1
		Checked	Confidence	Identifying Node	PSM Ambiguity	Annotated Sequence	Modifications	# Protein Groups	# Proteins	Master Protein Accessions	Protein Accessions	# Missed Cleavages	Charge	DeltaScore	DeltaCn	Rank	Search Engine Rank	m/z [Da]	MH+ [Da]	Theo. MH+ [Da]	DeltaM [ppm]	Deltam/z [Da]	Activation Type	MS Order	Isolation Interference [%]	Ion Inject Time [ms]	RT [min]	First Scan	Spectrum File	File ID	Quan Info	XCorr	Ions Score	Contaminant	Identity Strict	Identity Relaxed	Expectation Value	Percolator q-Value	Percolator PEP	Precursor Abundance	Apex RT [min]	Identifying Node			Identifying No	ntifying	tifying	tifying	DeltaM [ppm]
		FALSE	High	Sequest HT (A2)	Unambiguous	[R].GSYGSGGSSYGSGGGSYGSGGGGGGHGSYGSGSSSGGYR.[G]		1	1	P04264	P04264	0	3	0.853	0	1	1	1104.78	3312.31	3312.31	1.02	0.00113	HCD (High Energy Collision Dissociation)	MS2	0	141.89	30.1165	16251	01082019_Fusion_MASSFIITB_307198_S5.raw	F5		3.47		FALSE				0	8.218e-07	15079877	29.87	Sequest HT (A2)			Sequest HT (A2	uest HT	est HT	est HT	1.02
		FALSE	High	Sequest HT (A2)	Unambiguous	[R].GSYGSGGSSYGSGGGSYGSGGGGGGHGSYGSGSSSGGYR.[G]		1	1	P04264	P04264	0	3	0.8559	0	1	1	1104.77	3312.31	3312.31	-0.35	-0.00038	HCD (High Energy Collision Dissociation)	MS2	0	26.834	28.9677	15691	01082019_Fusion_MASSFIITB_307198_S3.raw	F3		5.62		FALSE				0	6.785e-06	340016256	29.18	Sequest HT (A2)			Sequest HT (A2	uest HT	est HT	est HT	-0.35
		FALSE	High	Sequest HT (A2)	Unambiguous	[R].GSYGSGGSSYGSGGGSYGSGGGGGGHGSYGSGSSSGGYR.[G]		1	1	P04264	P04264	0	3	0.9267	0	1	1	1104.77	3312.31	3312.31	-0.02	-3e-05	HCD (High Energy Collision Dissociation)	MS2	0	13.518	29.5371	15978	01082019_Fusion_MASSFIITB_307198_S4.raw	F4		5.59		FALSE				0	1.635e-05	578122944	29.24	Sequest HT (A2)			Sequest HT (A2	uest HT	est HT	est HT	-0.02
		FALSE	High	Mascot (A5)	Unambiguous	[R].GSYGSGGSSYGSGGGSYGSGGGGGGHGSYGSGSSSGGYR.[G]		1	1	P04264	P04264	0	3	1	0	1	1	1104.78	3312.31	3312.31	1.02	0.00113	HCD (High Energy Collision Dissociation)	MS2	0	141.89	30.1165	16251	01082019_Fusion_MASSFIITB_307198_S5.raw	F5			59	FALSE	31	13	1.7262e-07	0	2.777e-05	15079877	29.87	Mascot (A5)			Mascot (A5)	cot (A5)	ot (A5)	ot (A5)	1.02
		FALSE	High	Sequest HT (A2)	Unambiguous	[R].GSYGSGGSSYGSGGGSYGSGGGGGGHGSYGSGSSSGGYR.[G]		1	1	P04264	P04264	0	3	0.871	0	1	1	1104.77	3312.31	3312.31	-0.06	-7e-05	HCD (High Energy Collision Dissociation)	MS2	0	10.454	29.2935	15340	01082019_Fusion_MASSFIITB_307198_S2.raw	F2		4.42		FALSE				0	5.884e-05	288847744	29.16	Sequest HT (A2)			Sequest HT (A2	uest HT	est HT	est HT	-0.06
		FALSE	High	Mascot (A5)	Unambiguous	[R].GSYGSGGSSYGSGGGSYGSGGGGGGHGSYGSGSSSGGYR.[G]		1	1	P04264	P04264	0	3	1	0	1	1	1104.77	3312.31	3312.31	-0.35	-0.00038	HCD (High Energy Collision Dissociation)	MS2	0	26.834	28.9677	15691	01082019_Fusion_MASSFIITB_307198_S3.raw	F3			85	FALSE	31	13	5.04767e-10	0	7.055e-05	340016256	29.18	Mascot (A5)			Mascot (A5)	cot (A5)	ot (A5)	ot (A5)	-0.35
		FALSE	High	Mascot (A5)	Unambiguous	[R].GSYGSGGSSYGSGGGSYGSGGGGGGHGSYGSGSSSGGYR.[G]		1	1	P04264	P04264	0	3	1	0	1	1	1104.77	3312.31	3312.31	-0.02	-3e-05	HCD (High Energy Collision Dissociation)	MS2	0	13.518	29.5371	15978	01082019_Fusion_MASSFIITB_307198_S4.raw	F4			95	FALSE	31	13	5.28556e-11	0	0.0001273	578122944	29.24	Mascot (A5)			Mascot (A5)	cot (A5)	ot (A5)	ot (A5)	-0.02
		FALSE	High	Mascot (A5)	Unambiguous	[R].GSYGSGGSSYGSGGGSYGSGGGGGGHGSYGSGSSSGGYR.[G]		1	1	P04264	P04264	0	3	1	0	1	1	1104.77	3312.31	3312.31	-0.06	-7e-05	HCD (High Energy Collision Dissociation)	MS2	0	10.454	29.2935	15340	01082019_Fusion_MASSFIITB_307198_S2.raw	F2			93	FALSE	31	13	6.91976e-11	0	0.0001692	288847744	29.16	Mascot (A5)			Mascot (A5)	cot (A5)	ot (A5)	ot (A5)	-0.06
		FALSE	High	Sequest HT (A2)	Unambiguous	[R].GSYGSGGSSYGSGGGSYGSGGGGGGHGSYGSGSSSGGYR.[G]		1	1	P04264	P04264	0	3	0.8592	0	1	1	1104.77	3312.31	3312.31	-0.23	-0.00025	HCD (High Energy Collision Dissociation)	MS2	0	30	29.1174	15246	01082019_Fusion_MASSFIITB_307198_S1.raw	F1		4.26		FALSE				0	0.0005366	106160544	29.21	Sequest HT (A2)			Sequest HT (A2	uest HT	est HT	est HT	-0.23
		FALSE	High	Sequest HT (A2)	Unambiguous	[R].GSYGSGGSSYGSGGGSYGSGGGGGGHGSYGSGSSSGGYR.[G]		1	1	P04264	P04264	0	3	0.8326	0	1	1	1104.77	3312.31	3312.31	0.42	0.00047	HCD (High Energy Collision Dissociation)	MS2	0	30	29.6348	16265	01082019_Fusion_MASSFIITB_307198_S3.raw	F3		4.78		FALSE				0	0.001844	340016256	29.18	Sequest HT (A2)			Sequest HT (A2	uest HT	est HT	est HT	0.42
		FALSE	High	Mascot (A5)	Unambiguous	[R].GSYGSGGSSYGSGGGSYGSGGGGGGHGSYGSGSSSGGYR.[G]		1	1	P04264	P04264	0	3	1	0	1	1	1104.77	3312.31	3312.31	-0.23	-0.00025	HCD (High Energy Collision Dissociation)	MS2	0	30	29.1174	15246	01082019_Fusion_MASSFIITB_307198_S1.raw	F1			66	FALSE	31	13	3.41265e-08	0	0.005769	106160544	29.21	Mascot (A5)			Mascot (A5)	cot (A5)	ot (A5)	ot (A5)	-0.23
		FALSE	High	Mascot (A5)	Selected	[R].GSYGSGGSSYGSGGGSYGSGGGGGGHGSYGSGSSSGGYR.[G]		1	1	P04264	P04264	0	3	1	0	1	1	1104.77	3312.31	3312.31	-0.71	-0.00078	HCD (High Energy Collision Dissociation)	MS2	0	49.673	29.5712	14292	01082019_Fusion_MASSFIITB_307198_S6.raw	F6			66	FALSE	31	13	3.63154e-08	0.000249	0.02688	63256228	29.15	Mascot (A5)			Mascot (A5)	cot (A5)	ot (A5)	ot (A5)	-0.71
		FALSE	High	Sequest HT (A2)	Unambiguous	[R].GSYGSGGSSYGSGGGSYGSGGGGGGHGSYGSGSSSGGYR.[G]		1	1	P04264	P04264	0	3	0.8669	0	1	1	1104.77	3312.31	3312.31	0.27	0.00029	HCD (High Energy Collision Dissociation)	MS2	0	30	29.37	15638	01082019_Fusion_MASSFIITB_307198_S5.raw	F5		2.93		FALSE				0.001169	0.02706	268557152	28.96	Sequest HT (A2)			Sequest HT (A2	uest HT	est HT	est HT	0.27
		FALSE	High	Mascot (A5)	Unambiguous	[R].GSYGSGGSSYGSGGGSYGSGGGGGGHGSYGSGSSSGGYR.[G]		1	1	P04264	P04264	0	3	1	0	1	1	1104.77	3312.31	3312.31	0.42	0.00047	HCD (High Energy Collision Dissociation)	MS2	0	30	29.6348	16265	01082019_Fusion_MASSFIITB_307198_S3.raw	F3			40	FALSE	31	13	1.48283e-05	0.003781	0.07027	340016256	29.18	Mascot (A5)			Mascot (A5)	cot (A5)	ot (A5)	ot (A5)	0.42
		FALSE	High	Mascot (A5)	Unambiguous	[R].GSYGSGGSSYGSGGGSYGSGGGGGGHGSYGSGSSSGGYR.[G]		1	1	P04264	P04264	0	3	1	0	1	1	1104.77	3312.31	3312.31	0.27	0.00029	HCD (High Energy Collision Dissociation)	MS2	0	30	29.37	15638	01082019_Fusion_MASSFIITB_307198_S5.raw	F5			52	FALSE	31	13	9.72952e-07	0.01521	0.1708			Mascot (A5)			Mascot (A5)	cot (A5)	ot (A5)	ot (A5)	0.27
	FALSE	High	[R].GGGGGGYGSGGSSYGSGGGSYGSGGGGGGGR.[G]			FALSE	1	1	11	P04264	P04264 [519-549]	0	2383.95	0	97.5	87.2	87.5	118.3	111.1	86.1	157.2	145.8	9.2		Peak Found	High	High	High	High	High	Peak Found	Peak Found	Peak Found	High	High	0	0	2.111e-07	6.327e-07	4.29	136		R.GGGGGGYGSGGSSYGSGGGSYGSGGGGGGGR.G	[519-549]					157.2
		Checked	Confidence	Identifying Node	PSM Ambiguity	Annotated Sequence	Modifications	# Protein Groups	# Proteins	Master Protein Accessions	Protein Accessions	# Missed Cleavages	Charge	DeltaScore	DeltaCn	Rank	Search Engine Rank	m/z [Da]	MH+ [Da]	Theo. MH+ [Da]	DeltaM [ppm]	Deltam/z [Da]	Activation Type	MS Order	Isolation Interference [%]	Ion Inject Time [ms]	RT [min]	First Scan	Spectrum File	File ID	Quan Info	XCorr	Ions Score	Contaminant	Identity Strict	Identity Relaxed	Expectation Value	Percolator q-Value	Percolator PEP	Precursor Abundance	Apex RT [min]	Identifying Node			Identifying No	ntifying	tifying	tifying	DeltaM [ppm]
		FALSE	High	Mascot (A5)	Unambiguous	[R].GGGGGGYGSGGSSYGSGGGSYGSGGGGGGGR.[G]		1	1	P04264	P04264	0	2	1	0	1	1	1192.48	2383.95	2383.95	-0.94	-0.00112	HCD (High Energy Collision Dissociation)	MS2	0	30	27.6596	14358	01082019_Fusion_MASSFIITB_307198_S4.raw	F4			136	FALSE	39	21	2.53352e-14	0	2.111e-07	1535904896	27.23	Mascot (A5)			Mascot (A5)	cot (A5)	ot (A5)	ot (A5)	-0.94
		FALSE	High	Sequest HT (A2)	Unambiguous	[R].GGGGGGYGSGGSSYGSGGGSYGSGGGGGGGR.[G]		1	1	P04264	P04264	0	2	0.8298	0	1	1	1192.48	2383.95	2383.95	-0.94	-0.00112	HCD (High Energy Collision Dissociation)	MS2	0	30	27.6596	14358	01082019_Fusion_MASSFIITB_307198_S4.raw	F4		4.29		FALSE				0	6.327e-07	1535904896	27.23	Sequest HT (A2)			Sequest HT (A2	uest HT	est HT	est HT	-0.94
		FALSE	High	Sequest HT (A2)	Unambiguous	[R].GGGGGGYGSGGSSYGSGGGSYGSGGGGGGGR.[G]		1	1	P04264	P04264	0	2	0.8912	0	1	1	1192.48	2383.95	2383.95	-0.4	-0.00047	HCD (High Energy Collision Dissociation)	MS2	0	30	27.5371	14107	01082019_Fusion_MASSFIITB_307198_S5.raw	F5		2.85		FALSE				0	0.0001402	881297536	27.14	Sequest HT (A2)			Sequest HT (A2	uest HT	est HT	est HT	-0.4
		FALSE	High	Mascot (A5)	Unambiguous	[R].GGGGGGYGSGGSSYGSGGGSYGSGGGGGGGR.[G]		1	1	P04264	P04264	0	2	1	0	1	1	1192.48	2383.95	2383.95	-0.4	-0.00047	HCD (High Energy Collision Dissociation)	MS2	0	30	27.5371	14107	01082019_Fusion_MASSFIITB_307198_S5.raw	F5			102	FALSE	39	21	6.24775e-11	0	0.0002174	881297536	27.14	Mascot (A5)			Mascot (A5)	cot (A5)	ot (A5)	ot (A5)	-0.4
		FALSE	High	Mascot (A5)	Unambiguous	[R].GGGGGGYGSGGSSYGSGGGSYGSGGGGGGGR.[G]		1	1	P04264	P04264	0	2	1	0	1	1	1192.48	2383.95	2383.95	0.14	0.00016	HCD (High Energy Collision Dissociation)	MS2	0	30	27.7155	14636	01082019_Fusion_MASSFIITB_307198_S3.raw	F3			91	FALSE	39	21	6.28664e-10	0	0.01292	917641472	27.18	Mascot (A5)			Mascot (A5)	cot (A5)	ot (A5)	ot (A5)	0.14
		FALSE	High	Sequest HT (A2)	Unambiguous	[R].GGGGGGYGSGGSSYGSGGGSYGSGGGGGGGR.[G]		1	1	P04264	P04264	0	2	0.9124	0	1	1	1192.48	2383.95	2383.95	0.14	0.00016	HCD (High Energy Collision Dissociation)	MS2	0	30	27.7155	14636	01082019_Fusion_MASSFIITB_307198_S3.raw	F3		2.74		FALSE				0.004985	0.08234	917641472	27.18	Sequest HT (A2)			Sequest HT (A2	uest HT	est HT	est HT	0.14
		FALSE	High	Mascot (A5)	Selected	[R].GGGGGGYGSGGSSYGSGGGSYGSGGGGGGGR.[G]		1	1	P04264	P04264	0	2	1	0	1	1	1192.48	2383.95	2383.95	-0.62	-0.00073	HCD (High Energy Collision Dissociation)	MS2	0	30.907	27.6605	12735	01082019_Fusion_MASSFIITB_307198_S6.raw	F6			78	FALSE	39	21	1.46125e-08	0.01576	0.1742	223662480	27.36	Mascot (A5)			Mascot (A5)	cot (A5)	ot (A5)	ot (A5)	-0.62
		FALSE	High	Mascot (A5)	Selected	[R].GGGGGGYGSGGSSYGSGGGSYGSGGGGGGGR.[G]		1	1	P04264	P04264	0	3	1	0	1	1	795.321	2383.95	2383.95	-0.9	-0.00072	HCD (High Energy Collision Dissociation)	MS2	0	30	27.0573	13825	01082019_Fusion_MASSFIITB_307198_S4.raw	F4			50	FALSE	39	21	9.4129e-06	0.02146	0.1996	183586864	27.27	Mascot (A5)			Mascot (A5)	cot (A5)	ot (A5)	ot (A5)	-0.9
		FALSE	High	Mascot (A5)	Selected	[R].GGGGGGYGSGGSSYGSGGGSYGSGGGGGGGR.[G]		1	1	P04264	P04264	0	3	1	0	1	1	795.324	2383.96	2383.95	1.86	0.00148	HCD (High Energy Collision Dissociation)	MS2	15.1747	30	27.073	14043	01082019_Fusion_MASSFIITB_307198_S3.raw	F3			45	FALSE	39	22	3.38844e-05	0.03764	0.2759	109990992	27.18	Mascot (A5)			Mascot (A5)	cot (A5)	ot (A5)	ot (A5)	1.86
		FALSE	High	Mascot (A5)	Selected	[R].GGGGGGYGSGGSSYGSGGGSYGSGGGGGGGR.[G]		1	1	P04264	P04264	0	2	1	0	1	1	1192.48	2383.95	2383.95	-0.13	-0.00016	HCD (High Energy Collision Dissociation)	MS2	0	30	27.6912	13962	01082019_Fusion_MASSFIITB_307198_S2.raw	F2			59	FALSE	39	21	1.11537e-06	0.0609	0.3701	772836608	27.24	Mascot (A5)			Mascot (A5)	cot (A5)	ot (A5)	ot (A5)	-0.13
		FALSE	High	Mascot (A5)	Selected	[R].GGGGGGYGSGGSSYGSGGGSYGSGGGGGGGR.[G]		1	1	P04264	P04264	0	3	1	0	1	1	795.323	2383.95	2383.95	0.52	0.00042	HCD (High Energy Collision Dissociation)	MS2	11.6664	30	27.066	13409	01082019_Fusion_MASSFIITB_307198_S2.raw	F2			41	FALSE	39	21	7.35223e-05	0.112	0.5102	140749856	27.24	Mascot (A5)			Mascot (A5)	cot (A5)	ot (A5)	ot (A5)	0.52
	FALSE	High	[R].GGSGGGGGGSSGGRGSGGGSSGGSIGGRGSSSGGVK.[S]			FALSE	1	1	2	P04264	P04264 [589-624]	2	2739.24	0	85.8	52.5	42.2	103.6	156.4	49	227.4	183.1			Peak Found	High	Peak Found	High	Peak Found	Peak Found	Peak Found	Peak Found	Not Found	n/a	High		0.007956		0.09695	3.08			R.GGSGGGGGGSSGGRGSGGGSSGGSIGGRGSSSGGVK.S	[589-624]					227.4
		Checked	Confidence	Identifying Node	PSM Ambiguity	Annotated Sequence	Modifications	# Protein Groups	# Proteins	Master Protein Accessions	Protein Accessions	# Missed Cleavages	Charge	DeltaScore	DeltaCn	Rank	Search Engine Rank	m/z [Da]	MH+ [Da]	Theo. MH+ [Da]	DeltaM [ppm]	Deltam/z [Da]	Activation Type	MS Order	Isolation Interference [%]	Ion Inject Time [ms]	RT [min]	First Scan	Spectrum File	File ID	Quan Info	XCorr	Ions Score	Contaminant	Identity Strict	Identity Relaxed	Expectation Value	Percolator q-Value	Percolator PEP	Precursor Abundance	Apex RT [min]	Identifying Node			Identifying No	ntifying	tifying	tifying	DeltaM [ppm]
		FALSE	High	Sequest HT (A2)	Unambiguous	[R].GGSGGGGGGSSGGRGSGGGSSGGSIGGRGSSSGGVK.[S]		1	1	P04264	P04264	2	4	0.4903	0	1	1	685.565	2739.24	2739.24	0.54	0.00037	HCD (High Energy Collision Dissociation)	MS2	1.74483	30	15.8057	4353	01082019_Fusion_MASSFIITB_307198_S2.raw	F2		3.08		FALSE				0.007956	0.09695	3.69211e+06	15.79	Sequest HT (A2)			Sequest HT (A2	uest HT	est HT	est HT	0.54
		FALSE	High	Sequest HT (A2)	Unambiguous	[R].GGSGGGGGGSSGGRGSGGGSSGGSIGGRGSSSGGVK.[S]		1	1	P04264	P04264	2	4	0.6034	0	1	1	685.565	2739.24	2739.24	0.41	0.00028	HCD (High Energy Collision Dissociation)	MS2	0.516573	14.573	15.7255	4386	01082019_Fusion_MASSFIITB_307198_S4.raw	F4		2.9		FALSE				0.02552	0.2499	10108043	15.72	Sequest HT (A2)			Sequest HT (A2	uest HT	est HT	est HT	0.41
	FALSE	High	[R].GSYGSGGSSYGSGGGSYGSGGGGGGHGSYGSGSSSGGYRGGSGGGGGGSSGGR.[G]			FALSE	1	1	1	P04264	P04264 [550-602]	1	4299.72	0	67.7	181.9	107	300.1	184.1			59.3			Peak Found	Peak Found	Peak Found	High	Peak Found	Not Found	Not Found	Peak Found	Not Found	n/a	Low		0.1011		0.5498	4.2			R.GSYGSGGSSYGSGGGSYGSGGGGGGHGSYGSGSSSGGYRGGSGGGGGGSSGGR.G	[550-602]
		Checked	Confidence	Identifying Node	PSM Ambiguity	Annotated Sequence	Modifications	# Protein Groups	# Proteins	Master Protein Accessions	Protein Accessions	# Missed Cleavages	Charge	DeltaScore	DeltaCn	Rank	Search Engine Rank	m/z [Da]	MH+ [Da]	Theo. MH+ [Da]	DeltaM [ppm]	Deltam/z [Da]	Activation Type	MS Order	Isolation Interference [%]	Ion Inject Time [ms]	RT [min]	First Scan	Spectrum File	File ID	Quan Info	XCorr	Ions Score	Contaminant	Identity Strict	Identity Relaxed	Expectation Value	Percolator q-Value	Percolator PEP	Precursor Abundance	Apex RT [min]	Identifying Node			Identifying No	ntifying	tifying	tifying	DeltaM [ppm]
		FALSE	High	Sequest HT (A2)	Unambiguous	[R].GSYGSGGSSYGSGGGSYGSGGGGGGHGSYGSGSSSGGYRGGSGGGGGGSSGGR.[G]		1	1	P04264	P04264	1	4	1	0	1	1	1075.69	4299.72	4299.72	-0.15	-0.00016	HCD (High Energy Collision Dissociation)	MS2	0	30	26.4809	13364	01082019_Fusion_MASSFIITB_307198_S4.raw	F4		4.2		FALSE				0.1011	0.5498	173253792	26.09	Sequest HT (A2)			Sequest HT (A2	uest HT	est HT	est HT	-0.15
	FALSE	High	[K].KQISNLQQSISDAEQR.[G]			FALSE	1	1	8	P04264	P04264 [417-432]	1	1844.95	0	208.6	138.3	112	92.2	109.1	107.6	52.7	79.5			High	High	High	High	High	Peak Found	Peak Found	Peak Found	Not Found	High	High	0	0	0.003435	1.009e-05	5.23	49		K.KQISNLQQSISDAEQR.G	[417-432]					52.7
		Checked	Confidence	Identifying Node	PSM Ambiguity	Annotated Sequence	Modifications	# Protein Groups	# Proteins	Master Protein Accessions	Protein Accessions	# Missed Cleavages	Charge	DeltaScore	DeltaCn	Rank	Search Engine Rank	m/z [Da]	MH+ [Da]	Theo. MH+ [Da]	DeltaM [ppm]	Deltam/z [Da]	Activation Type	MS Order	Isolation Interference [%]	Ion Inject Time [ms]	RT [min]	First Scan	Spectrum File	File ID	Quan Info	XCorr	Ions Score	Contaminant	Identity Strict	Identity Relaxed	Expectation Value	Percolator q-Value	Percolator PEP	Precursor Abundance	Apex RT [min]	Identifying Node			Identifying No	ntifying	tifying	tifying	DeltaM [ppm]
		FALSE	High	Sequest HT (A2)	Unambiguous	[K].KQISNLQQSISDAEQR.[G]		1	1	P04264	P04264	1	3	0.6523	0	1	1	615.654	1844.95	1844.95	0.59	0.00036	HCD (High Energy Collision Dissociation)	MS2	39.1751	23.5	34.9041	20105	01082019_Fusion_MASSFIITB_307198_S5.raw	F5		4.17		FALSE				0	9.796e-06	18261726	34.84	Sequest HT (A2)			Sequest HT (A2	uest HT	est HT	est HT	0.59
		FALSE	High	Sequest HT (A2)	Unambiguous	[K].KQISNLQQSISDAEQR.[G]		1	1	P04264	P04264	1	3	0.6577	0	1	1	615.653	1844.95	1844.95	-0.21	-0.00013	HCD (High Energy Collision Dissociation)	MS2	31.3263	23.5	35.0815	20125	01082019_Fusion_MASSFIITB_307198_S2.raw	F2		5.23		FALSE				0	1.009e-05	27495994	35.17	Sequest HT (A2)			Sequest HT (A2	uest HT	est HT	est HT	-0.21
		FALSE	High	Sequest HT (A2)	Unambiguous	[K].KQISNLQQSISDAEQR.[G]		1	1	P04264	P04264	1	3	0.6067	0	1	1	615.654	1844.95	1844.95	0.26	0.00016	HCD (High Energy Collision Dissociation)	MS2	8.83484	23.5	34.9053	20475	01082019_Fusion_MASSFIITB_307198_S4.raw	F4		3.56		FALSE				0	1.166e-05	25435598	34.89	Sequest HT (A2)			Sequest HT (A2	uest HT	est HT	est HT	0.26
		FALSE	High	Sequest HT (A2)	Selected	[K].KQISNLQQSISDAEQR.[G]		1	1	P04264	P04264	1	3	0.719	0	1	1	615.654	1844.95	1844.95	0.6	0.00037	HCD (High Energy Collision Dissociation)	MS2	21.4816	24.779	34.9894	20750	01082019_Fusion_MASSFIITB_307198_S3.raw	F3		4.52		FALSE				0	1.333e-05	24958510	34.93	Sequest HT (A2)			Sequest HT (A2	uest HT	est HT	est HT	0.6
		FALSE	High	Mascot (A5)	Unambiguous	[K].KQISNLQQSISDAEQR.[G]		1	1	P04264	P04264	1	3	0.8841	0	1	1	615.653	1844.95	1844.95	-0.21	-0.00013	HCD (High Energy Collision Dissociation)	MS2	31.3263	23.5	35.0815	20125	01082019_Fusion_MASSFIITB_307198_S2.raw	F2			69	FALSE	54	36	3.42803e-06	0	9.691e-05	27495994	35.17	Mascot (A5)			Mascot (A5)	cot (A5)	ot (A5)	ot (A5)	-0.21
		FALSE	High	Mascot (A5)	Unambiguous	[K].KQISNLQQSISDAEQR.[G]		1	1	P04264	P04264	1	3	0.9254	0	1	1	615.654	1844.95	1844.95	0.59	0.00036	HCD (High Energy Collision Dissociation)	MS2	39.1751	23.5	34.9041	20105	01082019_Fusion_MASSFIITB_307198_S5.raw	F5			67	FALSE	54	36	5.98939e-06	0	0.0001037	18261726	34.84	Mascot (A5)			Mascot (A5)	cot (A5)	ot (A5)	ot (A5)	0.59
		FALSE	High	Mascot (A5)	Unambiguous	[K].KQISNLQQSISDAEQR.[G]		1	1	P04264	P04264	1	3	0.9831	0	1	1	615.654	1844.95	1844.95	0.26	0.00016	HCD (High Energy Collision Dissociation)	MS2	8.83484	23.5	34.9053	20475	01082019_Fusion_MASSFIITB_307198_S4.raw	F4			59	FALSE	54	36	3.42253e-05	0	0.0002261	25435598	34.89	Mascot (A5)			Mascot (A5)	cot (A5)	ot (A5)	ot (A5)	0.26
		FALSE	High	Sequest HT (A2)	Selected	[K].KQISNLQQSISDAEQR.[G]		1	1	P04264	P04264	1	3	0.5896	0	1	1	615.653	1844.95	1844.95	-0.33	-0.0002	HCD (High Energy Collision Dissociation)	MS2	13.6014	30	34.9748	20132	01082019_Fusion_MASSFIITB_307198_S1.raw	F1		4.24		FALSE				0	0.000274	15651643	35.07	Sequest HT (A2)			Sequest HT (A2	uest HT	est HT	est HT	-0.33
FALSE	High	Master Protein	Q96N67	Dedicator of cytokinesis protein 7 OS=Homo sapiens OX=9606 GN=DOCK7 PE=1 SV=4	0.009	FALSE	1.042	2	1	2	1	1	2140	242.4	6.8		2.95		1	0	123.6	103.1	8.8	245.4	398.9	20.1				Peak Found	High	Peak Found	High	Peak Found	Peak Found	Not Found	Not Found	Not Found				06 GN=DOCK7 PE=1 SV=4			06 GN=DOCK7 PE	DOCK7 P	DOCK7	DOCK7	123.6
	Checked	Confidence	Annotated Sequence	Modifications	Modifications in Master Proteins	Contaminant	# Protein Groups	# Proteins	# PSMs	Master Protein Accessions	Positions in Master Proteins	# Missed Cleavages	Theo. MH+ [Da]	# Razor Quan Results	Abundances (Grouped): F1, Sample	Abundances (Grouped): F2, Sample	Abundances (Grouped): F3, Sample	Abundances (Grouped): F4, Sample	Abundances (Grouped): F5, Sample	Abundances (Grouped): F6, Sample	Abundances (Grouped): F7, Sample	Abundances (Grouped): F8, Sample	Abundances (Grouped): F9, Sample	Quan Info	Found in Sample: [S1] F1: Sample	Found in Sample: [S2] F2: Sample	Found in Sample: [S3] F3: Sample	Found in Sample: [S4] F4: Sample	Found in Sample: [S5] F5: Sample	Found in Sample: [S6] F6: Sample	Found in Sample: [S7] F7: Sample	Found in Sample: [S8] F8: Sample	Found in Sample: [S9] F9: Sample	Confidence (by Search Engine): Mascot	Confidence (by Search Engine): Sequest HT	Percolator q-Value (by Search Engine): Mascot	Percolator q-Value (by Search Engine): Sequest HT	Percolator PEP (by Search Engine): Mascot	Percolator PEP (by Search Engine): Sequest HT	XCorr (by Search Engine): Sequest HT	Ions Score (by Search Engine): Mascot	Modifications	Sequence in Protein	Positions in Protein	Modifications	ificatio	ficatio	ficatio	Abundances (Grouped): F7, Sample
	FALSE	High	[R].RSTSSFSCLSR.[H]	1xCarbamidomethyl [C8]		FALSE	1	1	7	P35908	P35908 [35-45]	1	1287.61	0	57.4	87.6	57.3	124.2	111.3	143.1	136.5	182.4			Peak Found	High	High	High	High	High	Peak Found	High	Not Found	High	High	0	0	0.006936	0.01118	3.65	41	xCarbamidomethyl [C8]	R.RSTSSFSCLSR.H	[35-45]	xCarbamidometh	rbamidom	bamidom	bamidom	136.5
		Checked	Confidence	Identifying Node	PSM Ambiguity	Annotated Sequence	Modifications	# Protein Groups	# Proteins	Master Protein Accessions	Protein Accessions	# Missed Cleavages	Charge	DeltaScore	DeltaCn	Rank	Search Engine Rank	m/z [Da]	MH+ [Da]	Theo. MH+ [Da]	DeltaM [ppm]	Deltam/z [Da]	Activation Type	MS Order	Isolation Interference [%]	Ion Inject Time [ms]	RT [min]	First Scan	Spectrum File	File ID	Quan Info	XCorr	Ions Score	Contaminant	Identity Strict	Identity Relaxed	Expectation Value	Percolator q-Value	Percolator PEP	Precursor Abundance	Apex RT [min]	Identifying Node			Identifying No	ntifying	tifying	tifying	DeltaM [ppm]
		FALSE	High	Mascot (A5)	Unambiguous	[R].RSTSSFScLSR.[H]	C8(Carbamidomethyl)	1	1	P35908	P35908	1	3	0.8276	0	1	1	429.875	1287.61	1287.61	-0.7	-0.0003	HCD (High Energy Collision Dissociation)	MS2	15.802	30	24.8142	11346	01082019_Fusion_MASSFIITB_307198_S8.raw	F8			58	FALSE	51	33	2.35274e-05	0	0.00381	22592506	24.79	Mascot (A5)			Mascot (A5)	cot (A5)	ot (A5)	ot (A5)	-0.7
		FALSE	High	Sequest HT (A2)	Selected	[R].RSTSSFScLSR.[H]	C8(Carbamidomethyl)	1	1	P35908	P35908	1	3	0.5671	0	1	1	429.875	1287.61	1287.61	-0.94	-0.0004	HCD (High Energy Collision Dissociation)	MS2	43.4396	30	24.5303	11759	01082019_Fusion_MASSFIITB_307198_S4.raw	F4		3.65		FALSE				0	0.01118	116190720	24.67	Sequest HT (A2)			Sequest HT (A2	uest HT	est HT	est HT	-0.94
		FALSE	High	Sequest HT (A2)	Selected	[R].RSTSSFScLSR.[H]	C8(Carbamidomethyl)	1	1	P35908	P35908	1	3	0.622	0	1	1	429.875	1287.61	1287.61	-0.5	-0.00021	HCD (High Energy Collision Dissociation)	MS2	40.7525	17.66	24.6625	12011	01082019_Fusion_MASSFIITB_307198_S3.raw	F3		3.28		FALSE				0	0.01458	43328788	24.76	Sequest HT (A2)			Sequest HT (A2	uest HT	est HT	est HT	-0.5
		FALSE	High	Sequest HT (A2)	Unambiguous	[R].RSTSSFScLSR.[H]	C8(Carbamidomethyl)	1	1	P35908	P35908	1	3	0.5667	0	1	1	429.875	1287.61	1287.61	-0.7	-0.0003	HCD (High Energy Collision Dissociation)	MS2	15.802	30	24.8142	11346	01082019_Fusion_MASSFIITB_307198_S8.raw	F8		3.6		FALSE				0.0004992	0.02067	22592506	24.79	Sequest HT (A2)			Sequest HT (A2	uest HT	est HT	est HT	-0.7
		FALSE	High	Sequest HT (A2)	Selected	[R].RSTSSFScLSR.[H]	C8(Carbamidomethyl)	1	1	P35908	P35908	1	3	0.5843	0	1	1	429.875	1287.61	1287.61	-0.53	-0.00023	HCD (High Energy Collision Dissociation)	MS2	25.0762	24.793	24.8162	10491	01082019_Fusion_MASSFIITB_307198_S6.raw	F6		3.32		FALSE				0.0007429	0.02272	27604470	24.88	Sequest HT (A2)			Sequest HT (A2	uest HT	est HT	est HT	-0.53
		FALSE	High	Sequest HT (A2)	Selected	[R].RSTSSFScLSR.[H]	C8(Carbamidomethyl)	1	1	P35908	P35908	1	3	0.5304	0	1	1	429.875	1287.61	1287.61	-0.24	-0.0001	HCD (High Energy Collision Dissociation)	MS2	42.7773	30	24.6917	11724	01082019_Fusion_MASSFIITB_307198_S5.raw	F5		3.45		FALSE				0.002087	0.05199	63189816	24.82	Sequest HT (A2)			Sequest HT (A2	uest HT	est HT	est HT	-0.24
		FALSE	High	Sequest HT (A2)	Selected	[R].RSTSSFScLSR.[H]	C8(Carbamidomethyl)	1	1	P35908	P35908	1	3	0.4685	0	1	1	429.875	1287.61	1287.61	-0.85	-0.00036	HCD (High Energy Collision Dissociation)	MS2	64.4321	30	24.663	11410	01082019_Fusion_MASSFIITB_307198_S2.raw	F2		2.86		FALSE				0.03649	0.3163	59062624	24.81	Sequest HT (A2)			Sequest HT (A2	uest HT	est HT	est HT	-0.85
	FALSE	High	[K].SISISVAGGGGGFGAAGGFGGR.[G]			FALSE	1	1	21	P35908	P35908 [71-92]	0	1838.91	0		37.1	24.8	795.7	33.1		9.4				Not Found	Peak Found	Peak Found	High	High	Not Found	Peak Found	Not Found	Not Found	High	High	0	0	0.01369	3.768e-07	3.78	34		K.SISISVAGGGGGFGAAGGFGGR.G	[71-92]					9.4
		Checked	Confidence	Identifying Node	PSM Ambiguity	Annotated Sequence	Modifications	# Protein Groups	# Proteins	Master Protein Accessions	Protein Accessions	# Missed Cleavages	Charge	DeltaScore	DeltaCn	Rank	Search Engine Rank	m/z [Da]	MH+ [Da]	Theo. MH+ [Da]	DeltaM [ppm]	Deltam/z [Da]	Activation Type	MS Order	Isolation Interference [%]	Ion Inject Time [ms]	RT [min]	First Scan	Spectrum File	File ID	Quan Info	XCorr	Ions Score	Contaminant	Identity Strict	Identity Relaxed	Expectation Value	Percolator q-Value	Percolator PEP	Precursor Abundance	Apex RT [min]	Identifying Node			Identifying No	ntifying	tifying	tifying	DeltaM [ppm]
		FALSE	High	Sequest HT (A2)	Unambiguous	[K].SISISVAGGGGGFGAAGGFGGR.[G]		1	1	P35908	P35908	0	2	0.7872	0	1	1	919.961	1838.91	1838.91	0.16	0.00014	HCD (High Energy Collision Dissociation)	MS2	8.11395	30	60.4796	42661	01082019_Fusion_MASSFIITB_307198_S4.raw	F4		3.29		FALSE				0	2.264e-08			Sequest HT (A2)			Sequest HT (A2	uest HT	est HT	est HT	0.16
		FALSE	High	Sequest HT (A2)	Unambiguous	[K].SISISVAGGGGGFGAAGGFGGR.[G]		1	1	P35908	P35908	0	2	0.7804	0	1	1	919.961	1838.91	1838.91	0.27	0.00024	HCD (High Energy Collision Dissociation)	MS2	4.3062	30	61.8529	43862	01082019_Fusion_MASSFIITB_307198_S4.raw	F4		3.78		FALSE				0	3.768e-07	59984160	61.87	Sequest HT (A2)			Sequest HT (A2	uest HT	est HT	est HT	0.27
		FALSE	High	Mascot (A5)	Unambiguous	[K].SISISVAGGGGGFGAAGGFGGR.[G]		1	1	P35908	P35908	0	2	1	0	1	1	919.961	1838.91	1838.91	0.27	0.00024	HCD (High Energy Collision Dissociation)	MS2	4.3062	30	61.8529	43862	01082019_Fusion_MASSFIITB_307198_S4.raw	F4			90	FALSE	53	35	2.47018e-08	0	6.007e-07	59984160	61.87	Mascot (A5)			Mascot (A5)	cot (A5)	ot (A5)	ot (A5)	0.27
		FALSE	High	Mascot (A5)	Unambiguous	[K].SISISVAGGGGGFGAAGGFGGR.[G]		1	1	P35908	P35908	0	2	1	0	1	1	919.961	1838.91	1838.91	0.16	0.00014	HCD (High Energy Collision Dissociation)	MS2	8.11395	30	60.4796	42661	01082019_Fusion_MASSFIITB_307198_S4.raw	F4			113	FALSE	53	35	1.03449e-10	0	1.089e-06			Mascot (A5)			Mascot (A5)	cot (A5)	ot (A5)	ot (A5)	0.16
		FALSE	High	Sequest HT (A2)	Selected	[K].SISISVAGGGGGFGAAGGFGGR.[G]		1	1	P35908	P35908	0	2	0.7228	0	1	1	919.961	1838.91	1838.91	0.01	1e-05	HCD (High Energy Collision Dissociation)	MS2	19.6041	23.997	61.1655	43262	01082019_Fusion_MASSFIITB_307198_S4.raw	F4		2.85		FALSE				0	3.987e-06	32438318	60.89	Sequest HT (A2)			Sequest HT (A2	uest HT	est HT	est HT	0.01
		FALSE	High	Sequest HT (A2)	Unambiguous	[K].SISISVAGGGGGFGAAGGFGGR.[G]		1	1	P35908	P35908	0	2	0.7481	0	1	1	919.96	1838.91	1838.91	-0.42	-0.00039	HCD (High Energy Collision Dissociation)	MS2	9.32048	30	62.5458	44457	01082019_Fusion_MASSFIITB_307198_S4.raw	F4		2.58		FALSE				0	4.117e-06	59984160	61.87	Sequest HT (A2)			Sequest HT (A2	uest HT	est HT	est HT	-0.42
		FALSE	High	Mascot (A5)	Unambiguous	[K].SISISVAGGGGGFGAAGGFGGR.[G]		1	1	P35908	P35908	0	2	1	0	1	1	919.96	1838.91	1838.91	-0.42	-0.00039	HCD (High Energy Collision Dissociation)	MS2	9.32048	30	62.5458	44457	01082019_Fusion_MASSFIITB_307198_S4.raw	F4			89	FALSE	53	35	3.02042e-08	0	7.241e-06	59984160	61.87	Mascot (A5)			Mascot (A5)	cot (A5)	ot (A5)	ot (A5)	-0.42
		FALSE	High	Sequest HT (A2)	Unambiguous	[K].SISISVAGGGGGFGAAGGFGGR.[G]		1	1	P35908	P35908	0	2	0.819	0	1	1	919.961	1838.91	1838.91	-0.18	-0.00017	HCD (High Energy Collision Dissociation)	MS2	2.51213	30	63.2544	45080	01082019_Fusion_MASSFIITB_307198_S4.raw	F4		3.26		FALSE				0	2.199e-05	44814344	64.13	Sequest HT (A2)			Sequest HT (A2	uest HT	est HT	est HT	-0.18
		FALSE	High	Mascot (A5)	Unambiguous	[K].SISISVAGGGGGFGAAGGFGGR.[G]		1	1	P35908	P35908	0	2	1	0	1	1	919.96	1838.91	1838.91	-0.62	-0.00057	HCD (High Energy Collision Dissociation)	MS2	36.0577	30	64.0055	45748	01082019_Fusion_MASSFIITB_307198_S4.raw	F4			82	FALSE	53	35	1.45353e-07	0	3.71e-05	44814344	64.13	Mascot (A5)			Mascot (A5)	cot (A5)	ot (A5)	ot (A5)	-0.62
		FALSE	High	Mascot (A5)	Unambiguous	[K].SISISVAGGGGGFGAAGGFGGR.[G]		1	1	P35908	P35908	0	2	1	0	1	1	919.961	1838.91	1838.91	-0.18	-0.00017	HCD (High Energy Collision Dissociation)	MS2	2.51213	30	63.2544	45080	01082019_Fusion_MASSFIITB_307198_S4.raw	F4			82	FALSE	53	35	1.39938e-07	0	4.15e-05	44814344	64.13	Mascot (A5)			Mascot (A5)	cot (A5)	ot (A5)	ot (A5)	-0.18
		FALSE	High	Mascot (A5)	Selected	[K].SISISVAGGGGGFGAAGGFGGR.[G]		1	1	P35908	P35908	0	2	1	0	1	1	919.961	1838.91	1838.91	0.09	8e-05	HCD (High Energy Collision Dissociation)	MS2	0	30	59.0982	41450	01082019_Fusion_MASSFIITB_307198_S4.raw	F4			89	FALSE	53	35	2.9446e-08	0	5.378e-05	41355916	59.51	Mascot (A5)			Mascot (A5)	cot (A5)	ot (A5)	ot (A5)	0.09
		FALSE	High	Sequest HT (A2)	Unambiguous	[K].SISISVAGGGGGFGAAGGFGGR.[G]		1	1	P35908	P35908	0	2	0.7923	0	1	1	919.96	1838.91	1838.91	-0.62	-0.00057	HCD (High Energy Collision Dissociation)	MS2	36.0577	30	64.0055	45748	01082019_Fusion_MASSFIITB_307198_S4.raw	F4		3.66		FALSE				0	9.087e-05	44814344	64.13	Sequest HT (A2)			Sequest HT (A2	uest HT	est HT	est HT	-0.62
		FALSE	High	Sequest HT (A2)	Unambiguous	[K].SISISVAGGGGGFGAAGGFGGR.[G]		1	1	P35908	P35908	0	2	0.8167	0	1	1	919.962	1838.92	1838.91	1.27	0.00117	HCD (High Energy Collision Dissociation)	MS2	2.84847	30	64.7129	46376	01082019_Fusion_MASSFIITB_307198_S4.raw	F4		3.11		FALSE				0	0.0001128	48590380	64.45	Sequest HT (A2)			Sequest HT (A2	uest HT	est HT	est HT	1.27
		FALSE	High	Sequest HT (A2)	Unambiguous	[K].SISISVAGGGGGFGAAGGFGGR.[G]		1	1	P35908	P35908	0	2	0.7986	0	1	1	919.961	1838.91	1838.91	-0.31	-0.00028	HCD (High Energy Collision Dissociation)	MS2	27.7374	30	59.797	42071	01082019_Fusion_MASSFIITB_307198_S4.raw	F4		2.88		FALSE				0	0.0001636	41355916	59.51	Sequest HT (A2)			Sequest HT (A2	uest HT	est HT	est HT	-0.31
		FALSE	High	Mascot (A5)	Unambiguous	[K].SISISVAGGGGGFGAAGGFGGR.[G]		1	1	P35908	P35908	0	2	1	0	1	1	919.962	1838.92	1838.91	1.27	0.00117	HCD (High Energy Collision Dissociation)	MS2	2.84847	30	64.7129	46376	01082019_Fusion_MASSFIITB_307198_S4.raw	F4			80	FALSE	53	35	2.12396e-07	0	0.0002087	48590380	64.45	Mascot (A5)			Mascot (A5)	cot (A5)	ot (A5)	ot (A5)	1.27
		FALSE	High	Mascot (A5)	Unambiguous	[K].SISISVAGGGGGFGAAGGFGGR.[G]		1	1	P35908	P35908	0	2	1	0	1	1	919.961	1838.91	1838.91	-0.31	-0.00028	HCD (High Energy Collision Dissociation)	MS2	27.7374	30	59.797	42071	01082019_Fusion_MASSFIITB_307198_S4.raw	F4			69	FALSE	53	35	2.91841e-06	0	0.000248	41355916	59.51	Mascot (A5)			Mascot (A5)	cot (A5)	ot (A5)	ot (A5)	-0.31
		FALSE	High	Mascot (A5)	Unambiguous	[K].SISISVAGGGGGFGAAGGFGGR.[G]		1	1	P35908	P35908	0	2	1	0	1	1	919.961	1838.92	1838.91	0.54	0.0005	HCD (High Energy Collision Dissociation)	MS2	16.7127	30	66.1837	47744	01082019_Fusion_MASSFIITB_307198_S4.raw	F4			69	FALSE	53	35	2.75466e-06	0	0.0007183	34674668	65.68	Mascot (A5)			Mascot (A5)	cot (A5)	ot (A5)	ot (A5)	0.54
		FALSE	High	Sequest HT (A2)	Unambiguous	[K].SISISVAGGGGGFGAAGGFGGR.[G]		1	1	P35908	P35908	0	2	0.7545	0	1	1	919.961	1838.92	1838.91	0.54	0.0005	HCD (High Energy Collision Dissociation)	MS2	16.7127	30	66.1837	47744	01082019_Fusion_MASSFIITB_307198_S4.raw	F4		2.24		FALSE				0	0.000792	34674668	65.68	Sequest HT (A2)			Sequest HT (A2	uest HT	est HT	est HT	0.54
		FALSE	High	Mascot (A5)	Unambiguous	[K].SISISVAGGGGGFGAAGGFGGR.[G]		1	1	P35908	P35908	0	2	1	0	1	1	919.961	1838.91	1838.91	-0.29	-0.00027	HCD (High Energy Collision Dissociation)	MS2	10.089	30	65.4409	47050	01082019_Fusion_MASSFIITB_307198_S4.raw	F4			65	FALSE	53	35	7.06556e-06	0	0.00103	34674668	65.68	Mascot (A5)			Mascot (A5)	cot (A5)	ot (A5)	ot (A5)	-0.29
		FALSE	High	Sequest HT (A2)	Unambiguous	[K].SISISVAGGGGGFGAAGGFGGR.[G]		1	1	P35908	P35908	0	2	0.7806	0	1	1	919.961	1838.91	1838.91	-0.29	-0.00027	HCD (High Energy Collision Dissociation)	MS2	10.089	30	65.4409	47050	01082019_Fusion_MASSFIITB_307198_S4.raw	F4		2.37		FALSE				0	0.001049	34674668	65.68	Sequest HT (A2)			Sequest HT (A2	uest HT	est HT	est HT	-0.29
		FALSE	High	Sequest HT (A2)	Selected	[K].SISISVAGGGGGFGAAGGFGGR.[G]		1	1	P35908	P35908	0	2	0.8008	0	1	1	919.961	1838.91	1838.91	-0.11	-0.0001	HCD (High Energy Collision Dissociation)	MS2	0	30	62.0571	43810	01082019_Fusion_MASSFIITB_307198_S5.raw	F5		2.36		FALSE				0	0.01465	5411330	62.59	Sequest HT (A2)			Sequest HT (A2	uest HT	est HT	est HT	-0.11
	FALSE	High	[R].SLVGLGGTK.[S]			FALSE	1	1	2	P35908	P35908 [62-70]	0	831.493	0	67.6	107.5	161.8	148.9	102.4	69.7	123.7	97.8	20.6		Peak Found	High	Peak Found	High	Peak Found	Peak Found	Peak Found	Peak Found	Peak Found	High	Medium	0.0004792	0.01178	0.03057	0.1503	2	47		R.SLVGLGGTK.S	[62-70]					123.7
		Checked	Confidence	Identifying Node	PSM Ambiguity	Annotated Sequence	Modifications	# Protein Groups	# Proteins	Master Protein Accessions	Protein Accessions	# Missed Cleavages	Charge	DeltaScore	DeltaCn	Rank	Search Engine Rank	m/z [Da]	MH+ [Da]	Theo. MH+ [Da]	DeltaM [ppm]	Deltam/z [Da]	Activation Type	MS Order	Isolation Interference [%]	Ion Inject Time [ms]	RT [min]	First Scan	Spectrum File	File ID	Quan Info	XCorr	Ions Score	Contaminant	Identity Strict	Identity Relaxed	Expectation Value	Percolator q-Value	Percolator PEP	Precursor Abundance	Apex RT [min]	Identifying Node			Identifying No	ntifying	tifying	tifying	DeltaM [ppm]
		FALSE	High	Mascot (A5)	Selected	[R].SLVGLGGTK.[S]		1	1	P35908	P35908	0	2	0.8358	0	1	1	416.25	831.492	831.493	-1.45	-0.0006	HCD (High Energy Collision Dissociation)	MS2	2.69561	0.45	32.8497	18729	01082019_Fusion_MASSFIITB_307198_S4.raw	F4			67	FALSE	53	35	3.97539e-06	0.00399	0.08133	4341335552	32.76	Mascot (A5)			Mascot (A5)	cot (A5)	ot (A5)	ot (A5)	-1.45
		FALSE	High	Mascot (A5)	Selected	[R].SLVGLGGTK.[S]		1	1	P35908	P35908	0	2	0.8226	0	1	1	416.25	831.493	831.493	-1.08	-0.00045	HCD (High Energy Collision Dissociation)	MS2	3.42948	1.066	32.7465	18214	01082019_Fusion_MASSFIITB_307198_S2.raw	F2			62	FALSE	53	35	1.43928e-05	0.006978	0.1184	2259736832	32.68	Mascot (A5)			Mascot (A5)	cot (A5)	ot (A5)	ot (A5)	-1.08
	FALSE	High	[R].SKEEAEALYHSKYEELQVTVGR.[H]			FALSE	1	1	1	P35908	P35908 [363-384]	2	2566.28	0		46.1		803.8				50			Not Found	Peak Found	Not Found	High	Not Found	Not Found	Not Found	Peak Found	Not Found	High	High	0	0	2.576e-07	2.069e-10	7.98	32		R.SKEEAEALYHSKYEELQVTVGR.H	[363-384]
		Checked	Confidence	Identifying Node	PSM Ambiguity	Annotated Sequence	Modifications	# Protein Groups	# Proteins	Master Protein Accessions	Protein Accessions	# Missed Cleavages	Charge	DeltaScore	DeltaCn	Rank	Search Engine Rank	m/z [Da]	MH+ [Da]	Theo. MH+ [Da]	DeltaM [ppm]	Deltam/z [Da]	Activation Type	MS Order	Isolation Interference [%]	Ion Inject Time [ms]	RT [min]	First Scan	Spectrum File	File ID	Quan Info	XCorr	Ions Score	Contaminant	Identity Strict	Identity Relaxed	Expectation Value	Percolator q-Value	Percolator PEP	Precursor Abundance	Apex RT [min]	Identifying Node			Identifying No	ntifying	tifying	tifying	DeltaM [ppm]
		FALSE	High	Sequest HT (A2)	Selected	[R].SKEEAEALYHSKYEELQVTVGR.[H]		1	1	P35908	P35908	2	4	0.6591	0	1	1	642.325	2566.28	2566.28	-0.81	-0.00052	HCD (High Energy Collision Dissociation)	MS2	7.13281	23.5	42.1344	26574	01082019_Fusion_MASSFIITB_307198_S4.raw	F4		7.98		FALSE				0	2.069e-10	169255392	42.23	Sequest HT (A2)			Sequest HT (A2	uest HT	est HT	est HT	-0.81
	FALSE	High	[R].SKEEAEALYHSK.[Y]			FALSE	1	1	5	P35908	P35908 [363-374]	1	1391.68	0	65.2	163.3	178.2	315.8	177.5						Peak Found	High	High	High	High	Not Found	Not Found	Not Found	Not Found	High	High	0	0	0.0003531	2.428e-06	4.98	43		R.SKEEAEALYHSK.Y	[363-374]
		Checked	Confidence	Identifying Node	PSM Ambiguity	Annotated Sequence	Modifications	# Protein Groups	# Proteins	Master Protein Accessions	Protein Accessions	# Missed Cleavages	Charge	DeltaScore	DeltaCn	Rank	Search Engine Rank	m/z [Da]	MH+ [Da]	Theo. MH+ [Da]	DeltaM [ppm]	Deltam/z [Da]	Activation Type	MS Order	Isolation Interference [%]	Ion Inject Time [ms]	RT [min]	First Scan	Spectrum File	File ID	Quan Info	XCorr	Ions Score	Contaminant	Identity Strict	Identity Relaxed	Expectation Value	Percolator q-Value	Percolator PEP	Precursor Abundance	Apex RT [min]	Identifying Node			Identifying No	ntifying	tifying	tifying	DeltaM [ppm]
		FALSE	High	Sequest HT (A2)	Selected	[R].SKEEAEALYHSK.[Y]		1	1	P35908	P35908	1	3	0.7128	0	1	1	464.565	1391.68	1391.68	-0.1	-5e-05	HCD (High Energy Collision Dissociation)	MS2	7.1672	7.977	19.8458	7932	01082019_Fusion_MASSFIITB_307198_S4.raw	F4		4.7		FALSE				0	1.663e-06	548983168	19.54	Sequest HT (A2)			Sequest HT (A2	uest HT	est HT	est HT	-0.1
		FALSE	High	Sequest HT (A2)	Selected	[R].SKEEAEALYHSK.[Y]		1	1	P35908	P35908	1	3	0.6122	0	1	1	464.565	1391.68	1391.68	0.11	5e-05	HCD (High Energy Collision Dissociation)	MS2	13.8637	13.446	19.7715	7948	01082019_Fusion_MASSFIITB_307198_S3.raw	F3		4.59		FALSE				0	1.754e-06	250401840	19.53	Sequest HT (A2)			Sequest HT (A2	uest HT	est HT	est HT	0.11
		FALSE	High	Sequest HT (A2)	Selected	[R].SKEEAEALYHSK.[Y]		1	1	P35908	P35908	1	3	0.6586	0	1	1	464.565	1391.68	1391.68	-0.05	-2e-05	HCD (High Energy Collision Dissociation)	MS2	4.33755	8.585	19.3017	7265	01082019_Fusion_MASSFIITB_307198_S2.raw	F2		4.98		FALSE				0	2.428e-06	204703536	19.4	Sequest HT (A2)			Sequest HT (A2	uest HT	est HT	est HT	-0.05
		FALSE	High	Sequest HT (A2)	Selected	[R].SKEEAEALYHSK.[Y]		1	1	P35908	P35908	1	3	0.7011	0	1	1	464.565	1391.68	1391.68	-0.08	-4e-05	HCD (High Energy Collision Dissociation)	MS2	36.0654	30	19.1035	7477	01082019_Fusion_MASSFIITB_307198_S3.raw	F3		3.48		FALSE				0	4.666e-05	250401840	19.53	Sequest HT (A2)			Sequest HT (A2	uest HT	est HT	est HT	-0.08
		FALSE	High	Sequest HT (A2)	Selected	[R].SKEEAEALYHSK.[Y]		1	1	P35908	P35908	1	3	0.6364	0	1	1	464.565	1391.68	1391.68	0.66	0.00031	HCD (High Energy Collision Dissociation)	MS2	27.0456	30	20.0008	7929	01082019_Fusion_MASSFIITB_307198_S5.raw	F5		3.41		FALSE				0	8.717e-05	187341664	19.67	Sequest HT (A2)			Sequest HT (A2	uest HT	est HT	est HT	0.66
	FALSE	High	[K].NVQDAIADAEQR.[G]			FALSE	1	1	14	P35908	P35908 [419-430]	0	1329.64	0	142.5	94.5	126.8	95.4	95	122.8	109.5	113.5			High	Peak Found	High	High	High	High	High	High	Not Found	High	High	0	0	0.002366	4.366e-05	2.95	64		K.NVQDAIADAEQR.G	[419-430]					109.5
		Checked	Confidence	Identifying Node	PSM Ambiguity	Annotated Sequence	Modifications	# Protein Groups	# Proteins	Master Protein Accessions	Protein Accessions	# Missed Cleavages	Charge	DeltaScore	DeltaCn	Rank	Search Engine Rank	m/z [Da]	MH+ [Da]	Theo. MH+ [Da]	DeltaM [ppm]	Deltam/z [Da]	Activation Type	MS Order	Isolation Interference [%]	Ion Inject Time [ms]	RT [min]	First Scan	Spectrum File	File ID	Quan Info	XCorr	Ions Score	Contaminant	Identity Strict	Identity Relaxed	Expectation Value	Percolator q-Value	Percolator PEP	Precursor Abundance	Apex RT [min]	Identifying Node			Identifying No	ntifying	tifying	tifying	DeltaM [ppm]
		FALSE	High	Sequest HT (A2)	Unambiguous	[K].NVQDAIADAEQR.[G]		1	1	P35908	P35908	0	2	0.622	0	1	1	665.323	1329.64	1329.64	0.07	5e-05	HCD (High Energy Collision Dissociation)	MS2	19.232	30	39.3277	22019	01082019_Fusion_MASSFIITB_307198_S6.raw	F6		2.54		FALSE				0	5.762e-06	99651288	39.52	Sequest HT (A2)			Sequest HT (A2	uest HT	est HT	est HT	0.07
		FALSE	High	Sequest HT (A2)	Unambiguous	[K].NVQDAIADAEQR.[G]		1	1	P35908	P35908	0	2	0.635	0	1	1	665.324	1329.64	1329.64	0.96	0.00064	HCD (High Energy Collision Dissociation)	MS2	18.906	30	39.9318	24671	01082019_Fusion_MASSFIITB_307198_S4.raw	F4		2.63		FALSE				0	2.043e-05	375386720	39.58	Sequest HT (A2)			Sequest HT (A2	uest HT	est HT	est HT	0.96
		FALSE	High	Sequest HT (A2)	Unambiguous	[K].NVQDAIADAEQR.[G]		1	1	P35908	P35908	0	2	0.5627	0	1	1	665.324	1329.64	1329.64	1.13	0.00075	HCD (High Energy Collision Dissociation)	MS2	23.8258	23.5	39.3101	24391	01082019_Fusion_MASSFIITB_307198_S3.raw	F3		2.95		FALSE				0	4.366e-05	403400032	39.57	Sequest HT (A2)			Sequest HT (A2	uest HT	est HT	est HT	1.13
		FALSE	High	Mascot (A5)	Unambiguous	[K].NVQDAIADAEQR.[G]		1	1	P35908	P35908	0	2	1	0	1	1	665.324	1329.64	1329.64	0.96	0.00064	HCD (High Energy Collision Dissociation)	MS2	18.906	30	39.9318	24671	01082019_Fusion_MASSFIITB_307198_S4.raw	F4			63	FALSE	52	34	7.90243e-06	0	8.295e-05	375386720	39.58	Mascot (A5)			Mascot (A5)	cot (A5)	ot (A5)	ot (A5)	0.96
		FALSE	High	Mascot (A5)	Unambiguous	[K].NVQDAIADAEQR.[G]		1	1	P35908	P35908	0	2	1	0	1	1	665.323	1329.64	1329.64	0.07	5e-05	HCD (High Energy Collision Dissociation)	MS2	19.232	30	39.3277	22019	01082019_Fusion_MASSFIITB_307198_S6.raw	F6			80	FALSE	51	33	1.66606e-07	0	0.0001099	99651288	39.52	Mascot (A5)			Mascot (A5)	cot (A5)	ot (A5)	ot (A5)	0.07
		FALSE	High	Mascot (A5)	Unambiguous	[K].NVQDAIADAEQR.[G]		1	1	P35908	P35908	0	2	1	0	1	1	665.325	1329.64	1329.64	1.93	0.00128	HCD (High Energy Collision Dissociation)	MS2	22.1183	30	39.2541	23780	01082019_Fusion_MASSFIITB_307198_S5.raw	F5			70	FALSE	52	34	1.66788e-06	0	0.0001277	227052144	39.49	Mascot (A5)			Mascot (A5)	cot (A5)	ot (A5)	ot (A5)	1.93
		FALSE	High	Mascot (A5)	Unambiguous	[K].NVQDAIADAEQR.[G]		1	1	P35908	P35908	0	2	0.9412	0	1	1	665.324	1329.64	1329.64	1.13	0.00075	HCD (High Energy Collision Dissociation)	MS2	23.8258	23.5	39.3101	24391	01082019_Fusion_MASSFIITB_307198_S3.raw	F3			68	FALSE	52	34	2.33262e-06	0	0.0001958	403400032	39.57	Mascot (A5)			Mascot (A5)	cot (A5)	ot (A5)	ot (A5)	1.13
		FALSE	High	Sequest HT (A2)	Unambiguous	[K].NVQDAIADAEQR.[G]		1	1	P35908	P35908	0	2	0.6897	0	1	1	665.324	1329.64	1329.64	0.32	0.00021	HCD (High Energy Collision Dissociation)	MS2	4.03246	30	39.35	20928	01082019_Fusion_MASSFIITB_307198_S7.raw	F7		2.61		FALSE				0	0.000255	22463438	39.48	Sequest HT (A2)			Sequest HT (A2	uest HT	est HT	est HT	0.32
		FALSE	High	Mascot (A5)	Selected	[K].NVQDAIADAEQR.[G]		1	1	P35908	P35908	0	2	1	0	1	1	665.324	1329.64	1329.64	0.55	0.00036	HCD (High Energy Collision Dissociation)	MS2	32.3471	30	39.3454	22811	01082019_Fusion_MASSFIITB_307198_S8.raw	F8			71	FALSE	52	34	1.23243e-06	0	0.0005489	59148852	39.56	Mascot (A5)			Mascot (A5)	cot (A5)	ot (A5)	ot (A5)	0.55
		FALSE	High	Mascot (A5)	Unambiguous	[K].NVQDAIADAEQR.[G]		1	1	P35908	P35908	0	2	1	0	1	1	665.325	1329.64	1329.64	3.28	0.00218	HCD (High Energy Collision Dissociation)	MS2	26.1098	30	39.2428	24113	01082019_Fusion_MASSFIITB_307198_S4.raw	F4			64	FALSE	51	34	6.93874e-06	0	0.0008206	375386720	39.58	Mascot (A5)			Mascot (A5)	cot (A5)	ot (A5)	ot (A5)	3.28
		FALSE	High	Sequest HT (A2)	Unambiguous	[K].NVQDAIADAEQR.[G]		1	1	P35908	P35908	0	2	0.6846	0	1	1	665.325	1329.64	1329.64	1.93	0.00128	HCD (High Energy Collision Dissociation)	MS2	22.1183	30	39.2541	23780	01082019_Fusion_MASSFIITB_307198_S5.raw	F5		2.6		FALSE				0	0.0008734	227052144	39.49	Sequest HT (A2)			Sequest HT (A2	uest HT	est HT	est HT	1.93
		FALSE	High	Mascot (A5)	Unambiguous	[K].NVQDAIADAEQR.[G]		1	1	P35908	P35908	0	2	1	0	1	1	665.324	1329.64	1329.64	0.32	0.00021	HCD (High Energy Collision Dissociation)	MS2	4.03246	30	39.35	20928	01082019_Fusion_MASSFIITB_307198_S7.raw	F7			74	FALSE	51	33	6.22687e-07	0	0.00193	22463438	39.48	Mascot (A5)			Mascot (A5)	cot (A5)	ot (A5)	ot (A5)	0.32
		FALSE	High	Sequest HT (A2)	Unambiguous	[K].NVQDAIADAEQR.[G]		1	1	P35908	P35908	0	2	0.6977	0	1	1	665.325	1329.64	1329.64	3.28	0.00218	HCD (High Energy Collision Dissociation)	MS2	26.1098	30	39.2428	24113	01082019_Fusion_MASSFIITB_307198_S4.raw	F4		2.58		FALSE				0	0.002137	375386720	39.58	Sequest HT (A2)			Sequest HT (A2	uest HT	est HT	est HT	3.28
		FALSE	High	Mascot (A5)	Selected	[K].NVQDAIADAEQR.[G]		1	1	P35908	P35908	0	2	1	0	1	1	665.323	1329.64	1329.64	-0.13	-9e-05	HCD (High Energy Collision Dissociation)	MS2	14.7228	28.718	39.2702	23816	01082019_Fusion_MASSFIITB_307198_S1.raw	F1			64	FALSE	51	33	6.24729e-06	0	0.002366	152676528	39.49	Mascot (A5)			Mascot (A5)	cot (A5)	ot (A5)	ot (A5)	-0.13
	FALSE	High	[K].NVQDAIADAEQRGEHALK.[D]			FALSE	1	1	1	P35908	P35908 [419-436]	1	1964.98	0	198.7	174.5	88.2	183.5	201.9	53.2					Peak Found	High	Peak Found	Peak Found	Peak Found	Peak Found	Not Found	Not Found	Not Found	High	High	0	0	0.006366	4.753e-05	2.89	15		K.NVQDAIADAEQRGEHALK.D	[419-436]
		Checked	Confidence	Identifying Node	PSM Ambiguity	Annotated Sequence	Modifications	# Protein Groups	# Proteins	Master Protein Accessions	Protein Accessions	# Missed Cleavages	Charge	DeltaScore	DeltaCn	Rank	Search Engine Rank	m/z [Da]	MH+ [Da]	Theo. MH+ [Da]	DeltaM [ppm]	Deltam/z [Da]	Activation Type	MS Order	Isolation Interference [%]	Ion Inject Time [ms]	RT [min]	First Scan	Spectrum File	File ID	Quan Info	XCorr	Ions Score	Contaminant	Identity Strict	Identity Relaxed	Expectation Value	Percolator q-Value	Percolator PEP	Precursor Abundance	Apex RT [min]	Identifying Node			Identifying No	ntifying	tifying	tifying	DeltaM [ppm]
		FALSE	High	Sequest HT (A2)	Selected	[K].NVQDAIADAEQRGEHALK.[D]		1	1	P35908	P35908	1	4	0.5433	0	1	1	492	1964.98	1964.98	-0.24	-0.00012	HCD (High Energy Collision Dissociation)	MS2	28.4154	30	46.6567	30284	01082019_Fusion_MASSFIITB_307198_S2.raw	F2		2.89		FALSE				0	4.753e-05	27979726	46.7	Sequest HT (A2)			Sequest HT (A2	uest HT	est HT	est HT	-0.24
	FALSE	High	[K].NVQDAIADAEQRGEHALKDAR.[N]			FALSE	1	1	3	P35908	P35908 [419-439]	2	2307.14	0		324.4		565.7	9.9						Not Found	High	Not Found	High	Peak Found	Not Found	Not Found	Not Found	Not Found	High	High	0	0	0.007971	2.385e-05	3.87	4		K.NVQDAIADAEQRGEHALKDAR.N	[419-439]
		Checked	Confidence	Identifying Node	PSM Ambiguity	Annotated Sequence	Modifications	# Protein Groups	# Proteins	Master Protein Accessions	Protein Accessions	# Missed Cleavages	Charge	DeltaScore	DeltaCn	Rank	Search Engine Rank	m/z [Da]	MH+ [Da]	Theo. MH+ [Da]	DeltaM [ppm]	Deltam/z [Da]	Activation Type	MS Order	Isolation Interference [%]	Ion Inject Time [ms]	RT [min]	First Scan	Spectrum File	File ID	Quan Info	XCorr	Ions Score	Contaminant	Identity Strict	Identity Relaxed	Expectation Value	Percolator q-Value	Percolator PEP	Precursor Abundance	Apex RT [min]	Identifying Node			Identifying No	ntifying	tifying	tifying	DeltaM [ppm]
		FALSE	High	Sequest HT (A2)	Selected	[K].NVQDAIADAEQRGEHALKDAR.[N]		1	1	P35908	P35908	2	4	0.5478	0	1	1	577.541	2307.14	2307.14	-0.46	-0.00026	HCD (High Energy Collision Dissociation)	MS2	17.167	13.49	49.2782	32836	01082019_Fusion_MASSFIITB_307198_S4.raw	F4		3.87		FALSE				0	2.385e-05	135617904	49.2	Sequest HT (A2)			Sequest HT (A2	uest HT	est HT	est HT	-0.46
		FALSE	High	Sequest HT (A2)	Selected	[K].NVQDAIADAEQRGEHALKDAR.[N]		1	1	P35908	P35908	2	4	0.6269	0	1	1	577.541	2307.14	2307.14	-0.04	-2e-05	HCD (High Energy Collision Dissociation)	MS2	12.4131	7.41	49.2275	32790	01082019_Fusion_MASSFIITB_307198_S4.raw	F4		3.35		FALSE				0	2.688e-05	135617904	49.2	Sequest HT (A2)			Sequest HT (A2	uest HT	est HT	est HT	-0.04
		FALSE	High	Sequest HT (A2)	Selected	[K].NVQDAIADAEQRGEHALKDAR.[N]		1	1	P35908	P35908	2	4	0.5285	0	1	1	577.541	2307.14	2307.14	-0.56	-0.00032	HCD (High Energy Collision Dissociation)	MS2	33.7777	26.077	49.0202	32430	01082019_Fusion_MASSFIITB_307198_S2.raw	F2		3.69		FALSE				0	0.000275	53607452	49.06	Sequest HT (A2)			Sequest HT (A2	uest HT	est HT	est HT	-0.56
	FALSE	High	[R].NKLNDLEEALQQAK.[E]			FALSE	1	1	8	P35908	P35908 [440-453]	1	1613.85	0	163.2	138.1	126.1	117.7	200.4	127.3	2.9	24.3			High	High	High	High	High	High	Peak Found	Peak Found	Not Found	High	High	0	0	0.01773	0.0007789	3.75	24		R.NKLNDLEEALQQAK.E	[440-453]					2.9
		Checked	Confidence	Identifying Node	PSM Ambiguity	Annotated Sequence	Modifications	# Protein Groups	# Proteins	Master Protein Accessions	Protein Accessions	# Missed Cleavages	Charge	DeltaScore	DeltaCn	Rank	Search Engine Rank	m/z [Da]	MH+ [Da]	Theo. MH+ [Da]	DeltaM [ppm]	Deltam/z [Da]	Activation Type	MS Order	Isolation Interference [%]	Ion Inject Time [ms]	RT [min]	First Scan	Spectrum File	File ID	Quan Info	XCorr	Ions Score	Contaminant	Identity Strict	Identity Relaxed	Expectation Value	Percolator q-Value	Percolator PEP	Precursor Abundance	Apex RT [min]	Identifying Node			Identifying No	ntifying	tifying	tifying	DeltaM [ppm]
		FALSE	High	Sequest HT (A2)	Unambiguous	[R].NKLNDLEEALQQAK.[E]		1	1	P35908	P35908	1	2	0.6867	0	1	1	807.428	1613.85	1613.85	0.06	5e-05	HCD (High Energy Collision Dissociation)	MS2	28.6964	10.254	49.8049	32937	01082019_Fusion_MASSFIITB_307198_S5.raw	F5		3		FALSE				0	1.311e-06	72344064	49.88	Sequest HT (A2)			Sequest HT (A2	uest HT	est HT	est HT	0.06
		FALSE	High	Mascot (A5)	Unambiguous	[R].NKLNDLEEALQQAK.[E]		1	1	P35908	P35908	1	2	0.9872	0	1	1	807.428	1613.85	1613.85	0.06	5e-05	HCD (High Energy Collision Dissociation)	MS2	28.6964	10.254	49.8049	32937	01082019_Fusion_MASSFIITB_307198_S5.raw	F5			78	FALSE	53	35	3.51708e-07	0	6.79e-06	72344064	49.88	Mascot (A5)			Mascot (A5)	cot (A5)	ot (A5)	ot (A5)	0.06
		FALSE	High	Sequest HT (A2)	Selected	[R].NKLNDLEEALQQAK.[E]		1	1	P35908	P35908	1	3	0.5781	0	1	1	538.621	1613.85	1613.85	0.1	6e-05	HCD (High Energy Collision Dissociation)	MS2	15.3055	30	49.817	31066	01082019_Fusion_MASSFIITB_307198_S6.raw	F6		3.2		FALSE				0	0.0001089	24834782	50.01	Sequest HT (A2)			Sequest HT (A2	uest HT	est HT	est HT	0.1
		FALSE	High	Sequest HT (A2)	Selected	[R].NKLNDLEEALQQAK.[E]		1	1	P35908	P35908	1	3	0.6029	0	1	1	538.621	1613.85	1613.85	-0.17	-9e-05	HCD (High Energy Collision Dissociation)	MS2	43.5055	23.5	49.7329	33235	01082019_Fusion_MASSFIITB_307198_S4.raw	F4		3.4		FALSE				0	0.0005139	93131832	49.99	Sequest HT (A2)			Sequest HT (A2	uest HT	est HT	est HT	-0.17
		FALSE	High	Sequest HT (A2)	Selected	[R].NKLNDLEEALQQAK.[E]		1	1	P35908	P35908	1	3	0.5791	0	1	1	538.621	1613.85	1613.85	0.36	0.0002	HCD (High Energy Collision Dissociation)	MS2	34.5797	23.5	49.7636	33570	01082019_Fusion_MASSFIITB_307198_S3.raw	F3		2.97		FALSE				0	0.0006286	77793880	50.02	Sequest HT (A2)			Sequest HT (A2	uest HT	est HT	est HT	0.36
		FALSE	High	Sequest HT (A2)	Selected	[R].NKLNDLEEALQQAK.[E]		1	1	P35908	P35908	1	3	0.56	0	1	1	538.621	1613.85	1613.85	0.17	9e-05	HCD (High Energy Collision Dissociation)	MS2	18.8701	23.5	49.7387	33076	01082019_Fusion_MASSFIITB_307198_S2.raw	F2		3.75		FALSE				0	0.0007789	81672096	50.02	Sequest HT (A2)			Sequest HT (A2	uest HT	est HT	est HT	0.17
		FALSE	High	Sequest HT (A2)	Selected	[R].NKLNDLEEALQQAK.[E]		1	1	P35908	P35908	1	3	0.6299	0	1	1	538.622	1613.85	1613.85	2.06	0.00111	HCD (High Energy Collision Dissociation)	MS2	34.2657	23.5	49.6751	32815	01082019_Fusion_MASSFIITB_307198_S5.raw	F5		2.81		FALSE				0	0.004609	96587512	49.88	Sequest HT (A2)			Sequest HT (A2	uest HT	est HT	est HT	2.06
		FALSE	High	Sequest HT (A2)	Selected	[R].NKLNDLEEALQQAK.[E]		1	1	P35908	P35908	1	3	0.598	0	1	1	538.621	1613.85	1613.85	-1.24	-0.00066	HCD (High Energy Collision Dissociation)	MS2	36.0161	27.621	49.6825	33115	01082019_Fusion_MASSFIITB_307198_S1.raw	F1		3.01		FALSE				0	0.01055	42041144	49.91	Sequest HT (A2)			Sequest HT (A2	uest HT	est HT	est HT	-1.24
	FALSE	High	[R].NLDLDSIIAEVK.[A]			TRUE	4	9	24	P35908; P04259; P02538; P13647	P35908 [342-353]; P04259 [327-338]; P02538 [327-338]; P13647 [332-343]	0	1329.73	0	88.4	104	120.6	269.3	110.1	135.7	16.3	22.8	32.8	Shared	High	High	High	High	High	High	High	High	Peak Found	High	High	0	0	0.01146	9.111e-05	3.55	52		R.NLDLDSIIAEVK.A	[342-353]					16.3
		Checked	Confidence	Identifying Node	PSM Ambiguity	Annotated Sequence	Modifications	# Protein Groups	# Proteins	Master Protein Accessions	Protein Accessions	# Missed Cleavages	Charge	DeltaScore	DeltaCn	Rank	Search Engine Rank	m/z [Da]	MH+ [Da]	Theo. MH+ [Da]	DeltaM [ppm]	Deltam/z [Da]	Activation Type	MS Order	Isolation Interference [%]	Ion Inject Time [ms]	RT [min]	First Scan	Spectrum File	File ID	Quan Info	XCorr	Ions Score	Contaminant	Identity Strict	Identity Relaxed	Expectation Value	Percolator q-Value	Percolator PEP	Precursor Abundance	Apex RT [min]	Identifying Node			Identifying No	ntifying	tifying	tifying	DeltaM [ppm]
		FALSE	High	Sequest HT (A2)	Unambiguous	[R].NLDLDSIIAEVK.[A]		4	9	P35908; P04259; P02538; P13647	Q5XKE5; P35908; P04259; P02538; O95678; P48668; H0YIN9; H0YI76; P13647	0	2	0.7137	0	1	1	665.367	1329.73	1329.73	0.03	2e-05	HCD (High Energy Collision Dissociation)	MS2	0	30	68.3691	44098	01082019_Fusion_MASSFIITB_307198_S7.raw	F7		2.48		TRUE				0	1.458e-06	6.34737e+06	68.39	Sequest HT (A2)			Sequest HT (A2	uest HT	est HT	est HT	0.03
		FALSE	High	Sequest HT (A2)	Unambiguous	[R].NLDLDSIIAEVK.[A]		4	9	P35908; P04259; P02538; P13647	Q5XKE5; P35908; P04259; P02538; O95678; P48668; H0YIN9; H0YI76; P13647	0	2	0.6704	0	1	1	665.366	1329.73	1329.73	-0.35	-0.00023	HCD (High Energy Collision Dissociation)	MS2	6.99982	30	69.0043	50396	01082019_Fusion_MASSFIITB_307198_S4.raw	F4		2.67		TRUE				0	3.93e-06	2177751808	68.41	Sequest HT (A2)			Sequest HT (A2	uest HT	est HT	est HT	-0.35
		FALSE	High	Sequest HT (A2)	Unambiguous	[R].NLDLDSIIAEVK.[A]		4	9	P35908; P04259; P02538; P13647	Q5XKE5; P35908; P04259; P02538; O95678; P48668; H0YIN9; H0YI76; P13647	0	2	0.6518	0	1	1	665.366	1329.73	1329.73	-0.59	-0.00039	HCD (High Energy Collision Dissociation)	MS2	5.90725	30	59.0152	41378	01082019_Fusion_MASSFIITB_307198_S4.raw	F4		2.24		TRUE				0	4.221e-06	32511022	59.13	Sequest HT (A2)			Sequest HT (A2	uest HT	est HT	est HT	-0.59
		FALSE	High	Mascot (A5)	Unambiguous	[R].NLDLDSIIAEVK.[A]		4	9	P35908; P04259; P02538; P13647	Q5XKE5; P35908; P04259; P02538; O95678; P48668; H0YIN9; H0YI76; P13647	0	2	0.9032	0	1	1	665.367	1329.73	1329.73	0.03	2e-05	HCD (High Energy Collision Dissociation)	MS2	0	30	68.3691	44098	01082019_Fusion_MASSFIITB_307198_S7.raw	F7			93	TRUE	54	36	1.50371e-08	0	4.448e-06	6.34737e+06	68.39	Mascot (A5)			Mascot (A5)	cot (A5)	ot (A5)	ot (A5)	0.03
		FALSE	High	Sequest HT (A2)	Unambiguous	[R].NLDLDSIIAEVK.[A]		4	9	P35908; P04259; P02538; P13647	Q5XKE5; P35908; P04259; P02538; O95678; P48668; H0YIN9; H0YI76; P13647	0	2	0.7289	0	1	1	665.366	1329.73	1329.73	-0.24	-0.00016	HCD (High Energy Collision Dissociation)	MS2	11.0547	25.487	68.2851	50156	01082019_Fusion_MASSFIITB_307198_S3.raw	F3		3.32		TRUE				0	8.068e-06	413377728	68.37	Sequest HT (A2)			Sequest HT (A2	uest HT	est HT	est HT	-0.24
		FALSE	High	Mascot (A5)	Unambiguous	[R].NLDLDSIIAEVK.[A]		4	9	P35908; P04259; P02538; P13647	Q5XKE5; P35908; P04259; P02538; O95678; P48668; H0YIN9; H0YI76; P13647	0	2	0.9167	0	1	1	665.367	1329.73	1329.73	-0.02	-1e-05	HCD (High Energy Collision Dissociation)	MS2	0	30	68.3735	48000	01082019_Fusion_MASSFIITB_307198_S8.raw	F8			72	TRUE	54	36	1.53873e-06	0	2.496e-05	23038552	68.41	Mascot (A5)			Mascot (A5)	cot (A5)	ot (A5)	ot (A5)	-0.02
		FALSE	High	Sequest HT (A2)	Unambiguous	[R].NLDLDSIIAEVK.[A]		4	9	P35908; P04259; P02538; P13647	Q5XKE5; P35908; P04259; P02538; O95678; P48668; H0YIN9; H0YI76; P13647	0	2	0.6797	0	1	1	665.367	1329.73	1329.73	-0.02	-1e-05	HCD (High Energy Collision Dissociation)	MS2	0	30	68.3735	48000	01082019_Fusion_MASSFIITB_307198_S8.raw	F8		2.81		TRUE				0	2.679e-05	23038552	68.41	Sequest HT (A2)			Sequest HT (A2	uest HT	est HT	est HT	-0.02
		FALSE	High	Sequest HT (A2)	Unambiguous	[R].NLDLDSIIAEVK.[A]		4	9	P35908; P04259; P02538; P13647	Q5XKE5; P35908; P04259; P02538; O95678; P48668; H0YIN9; H0YI76; P13647	0	2	0.7143	0	1	1	665.367	1329.73	1329.73	0.04	3e-05	HCD (High Energy Collision Dissociation)	MS2	0.22397	23.5	68.9727	50792	01082019_Fusion_MASSFIITB_307198_S3.raw	F3		3.29		TRUE				0	2.989e-05	384111712	68.93	Sequest HT (A2)			Sequest HT (A2	uest HT	est HT	est HT	0.04
		FALSE	High	Mascot (A5)	Unambiguous	[R].NLDLDSIIAEVK.[A]		4	9	P35908; P04259; P02538; P13647	Q5XKE5; P35908; P04259; P02538; O95678; P48668; H0YIN9; H0YI76; P13647	0	2	0.908	0	1	1	665.366	1329.73	1329.73	-0.35	-0.00023	HCD (High Energy Collision Dissociation)	MS2	6.99982	30	69.0043	50396	01082019_Fusion_MASSFIITB_307198_S4.raw	F4			87	TRUE	54	36	5.00222e-08	0	4.157e-05	2177751808	68.41	Mascot (A5)			Mascot (A5)	cot (A5)	ot (A5)	ot (A5)	-0.35
		FALSE	High	Sequest HT (A2)	Unambiguous	[R].NLDLDSIIAEVK.[A]		4	9	P35908; P04259; P02538; P13647	Q5XKE5; P35908; P04259; P02538; O95678; P48668; H0YIN9; H0YI76; P13647	0	2	0.7246	0	1	1	665.366	1329.73	1329.73	-0.55	-0.00037	HCD (High Energy Collision Dissociation)	MS2	4.6607	30	68.2892	49723	01082019_Fusion_MASSFIITB_307198_S4.raw	F4		3.34		TRUE				0	4.32e-05	2177751808	68.41	Sequest HT (A2)			Sequest HT (A2	uest HT	est HT	est HT	-0.55
		FALSE	High	Mascot (A5)	Unambiguous	[R].NLDLDSIIAEVK.[A]		4	9	P35908; P04259; P02538; P13647	Q5XKE5; P35908; P04259; P02538; O95678; P48668; H0YIN9; H0YI76; P13647	0	2	0.9167	0	1	1	665.366	1329.73	1329.73	-0.24	-0.00016	HCD (High Energy Collision Dissociation)	MS2	11.0547	25.487	68.2851	50156	01082019_Fusion_MASSFIITB_307198_S3.raw	F3			84	TRUE	54	36	1.12244e-07	0	5.03e-05	413377728	68.37	Mascot (A5)			Mascot (A5)	cot (A5)	ot (A5)	ot (A5)	-0.24
		FALSE	High	Mascot (A5)	Unambiguous	[R].NLDLDSIIAEVK.[A]		4	9	P35908; P04259; P02538; P13647	Q5XKE5; P35908; P04259; P02538; O95678; P48668; H0YIN9; H0YI76; P13647	0	2	0.9184	0	1	1	665.366	1329.73	1329.73	-0.55	-0.00037	HCD (High Energy Collision Dissociation)	MS2	4.6607	30	68.2892	49723	01082019_Fusion_MASSFIITB_307198_S4.raw	F4			98	TRUE	54	37	4.89509e-09	0	5.313e-05	2177751808	68.41	Mascot (A5)			Mascot (A5)	cot (A5)	ot (A5)	ot (A5)	-0.55
		FALSE	High	Mascot (A5)	Selected	[R].NLDLDSIIAEVK.[A]		4	9	P35908; P04259; P02538; P13647	Q5XKE5; P35908; P04259; P02538; O95678; P48668; H0YIN9; H0YI76; P13647	0	2	0.9535	0	1	1	665.367	1329.73	1329.73	-0.01	0	HCD (High Energy Collision Dissociation)	MS2	9.38356	30	59.1411	41196	01082019_Fusion_MASSFIITB_307198_S5.raw	F5			86	TRUE	54	36	6.26849e-08	0	5.406e-05	9531377	59.21	Mascot (A5)			Mascot (A5)	cot (A5)	ot (A5)	ot (A5)	-0.01
		FALSE	High	Mascot (A5)	Unambiguous	[R].NLDLDSIIAEVK.[A]		4	9	P35908; P04259; P02538; P13647	Q5XKE5; P35908; P04259; P02538; O95678; P48668; H0YIN9; H0YI76; P13647	0	2	0.9318	0	1	1	665.366	1329.73	1329.73	-0.59	-0.00039	HCD (High Energy Collision Dissociation)	MS2	5.90725	30	59.0152	41378	01082019_Fusion_MASSFIITB_307198_S4.raw	F4			88	TRUE	54	36	4.666e-08	0	5.876e-05	32511022	59.13	Mascot (A5)			Mascot (A5)	cot (A5)	ot (A5)	ot (A5)	-0.59
		FALSE	High	Sequest HT (A2)	Unambiguous	[R].NLDLDSIIAEVK.[A]		4	9	P35908; P04259; P02538; P13647	Q5XKE5; P35908; P04259; P02538; O95678; P48668; H0YIN9; H0YI76; P13647	0	2	0.7061	0	1	1	665.366	1329.73	1329.73	-0.48	-0.00032	HCD (High Energy Collision Dissociation)	MS2	7.77331	29.445	68.3369	49898	01082019_Fusion_MASSFIITB_307198_S1.raw	F1		3.3		TRUE				0	6.579e-05	193153808	68.41	Sequest HT (A2)			Sequest HT (A2	uest HT	est HT	est HT	-0.48
		FALSE	High	Mascot (A5)	Unambiguous	[R].NLDLDSIIAEVK.[A]		4	9	P35908; P04259; P02538; P13647	Q5XKE5; P35908; P04259; P02538; O95678; P48668; H0YIN9; H0YI76; P13647	0	2	0.9048	0	1	1	665.366	1329.73	1329.73	-0.48	-0.00032	HCD (High Energy Collision Dissociation)	MS2	7.77331	29.445	68.3369	49898	01082019_Fusion_MASSFIITB_307198_S1.raw	F1			84	TRUE	54	36	1.14353e-07	0	7.096e-05	193153808	68.41	Mascot (A5)			Mascot (A5)	cot (A5)	ot (A5)	ot (A5)	-0.48
		FALSE	High	Sequest HT (A2)	Unambiguous	[R].NLDLDSIIAEVK.[A]		4	9	P35908; P04259; P02538; P13647	Q5XKE5; P35908; P04259; P02538; O95678; P48668; H0YIN9; H0YI76; P13647	0	2	0.7352	0	1	1	665.367	1329.73	1329.73	0.06	4e-05	HCD (High Energy Collision Dissociation)	MS2	0	30	68.3562	47539	01082019_Fusion_MASSFIITB_307198_S6.raw	F6		3.55		TRUE				0	9.111e-05	222270944	68.4	Sequest HT (A2)			Sequest HT (A2	uest HT	est HT	est HT	0.06
		FALSE	High	Sequest HT (A2)	Unambiguous	[R].NLDLDSIIAEVK.[A]		4	9	P35908; P04259; P02538; P13647	Q5XKE5; P35908; P04259; P02538; O95678; P48668; H0YIN9; H0YI76; P13647	0	2	0.7108	0	1	1	665.366	1329.73	1329.73	-0.56	-0.00037	HCD (High Energy Collision Dissociation)	MS2	2.34091	30	68.3386	50009	01082019_Fusion_MASSFIITB_307198_S2.raw	F2		3.25		TRUE				0	9.606e-05	611225856	68.42	Sequest HT (A2)			Sequest HT (A2	uest HT	est HT	est HT	-0.56
		FALSE	High	Mascot (A5)	Unambiguous	[R].NLDLDSIIAEVK.[A]		4	9	P35908; P04259; P02538; P13647	Q5XKE5; P35908; P04259; P02538; O95678; P48668; H0YIN9; H0YI76; P13647	0	2	0.9184	0	1	1	665.366	1329.73	1329.73	-0.56	-0.00037	HCD (High Energy Collision Dissociation)	MS2	2.34091	30	68.3386	50009	01082019_Fusion_MASSFIITB_307198_S2.raw	F2			98	TRUE	54	37	4.83905e-09	0	0.0001447	611225856	68.42	Mascot (A5)			Mascot (A5)	cot (A5)	ot (A5)	ot (A5)	-0.56
		FALSE	High	Sequest HT (A2)	Unambiguous	[R].NLDLDSIIAEVK.[A]		4	9	P35908; P04259; P02538; P13647	Q5XKE5; P35908; P04259; P02538; O95678; P48668; H0YIN9; H0YI76; P13647	0	2	0.7103	0	1	1	665.366	1329.73	1329.73	-0.38	-0.00026	HCD (High Energy Collision Dissociation)	MS2	0	30	59.1823	41957	01082019_Fusion_MASSFIITB_307198_S3.raw	F3		2.52		TRUE				0	0.000156	8.32546e+06	59.23	Sequest HT (A2)			Sequest HT (A2	uest HT	est HT	est HT	-0.38
		FALSE	High	Mascot (A5)	Unambiguous	[R].NLDLDSIIAEVK.[A]		4	9	P35908; P04259; P02538; P13647	Q5XKE5; P35908; P04259; P02538; O95678; P48668; H0YIN9; H0YI76; P13647	0	2	0.9158	0	1	1	665.367	1329.73	1329.73	0.04	3e-05	HCD (High Energy Collision Dissociation)	MS2	0.22397	23.5	68.9727	50792	01082019_Fusion_MASSFIITB_307198_S3.raw	F3			95	TRUE	54	36	9.66413e-09	0	0.0001774	384111712	68.93	Mascot (A5)			Mascot (A5)	cot (A5)	ot (A5)	ot (A5)	0.04
		FALSE	High	Mascot (A5)	Unambiguous	[R].NLDLDSIIAEVK.[A]		4	9	P35908; P04259; P02538; P13647	Q5XKE5; P35908; P04259; P02538; O95678; P48668; H0YIN9; H0YI76; P13647	0	2	0.9149	0	1	1	665.367	1329.73	1329.73	0.06	4e-05	HCD (High Energy Collision Dissociation)	MS2	0	30	68.3562	47539	01082019_Fusion_MASSFIITB_307198_S6.raw	F6			94	TRUE	54	36	9.75355e-09	0	0.0004324	222270944	68.4	Mascot (A5)			Mascot (A5)	cot (A5)	ot (A5)	ot (A5)	0.06
		FALSE	High	Mascot (A5)	Unambiguous	[R].NLDLDSIIAEVK.[A]		4	9	P35908; P04259; P02538; P13647	Q5XKE5; P35908; P04259; P02538; O95678; P48668; H0YIN9; H0YI76; P13647	0	2	0.9143	0	1	1	665.366	1329.73	1329.73	-0.38	-0.00026	HCD (High Energy Collision Dissociation)	MS2	0	30	59.1823	41957	01082019_Fusion_MASSFIITB_307198_S3.raw	F3			70	TRUE	54	36	3.02518e-06	0	0.0009252	8.32546e+06	59.23	Mascot (A5)			Mascot (A5)	cot (A5)	ot (A5)	ot (A5)	-0.38
		FALSE	High	Mascot (A5)	Selected	[R].NLDLDSIIAEVK.[A]		4	9	P35908; P04259; P02538; P13647	Q5XKE5; P35908; P04259; P02538; O95678; P48668; H0YIN9; H0YI76; P13647	0	2	0.9531	0	1	1	665.367	1329.73	1329.73	0.05	3e-05	HCD (High Energy Collision Dissociation)	MS2	0	30	69.7905	50901	01082019_Fusion_MASSFIITB_307198_S5.raw	F5			64	TRUE	54	36	1.21664e-05	0	0.002223	4.32691e+06	69.77	Mascot (A5)			Mascot (A5)	cot (A5)	ot (A5)	ot (A5)	0.05
	FALSE	High	[K].VDPEIQNVKAQEREQIK.[T]			FALSE	1	1	2	P35908	P35908 [167-183]	2	2024.08	0	116.7	184	98	177.5	122.6	116.2		85			Peak Found	High	Peak Found	Peak Found	High	Peak Found	Not Found	Peak Found	Not Found	High	High	0	0.0007429	0.004973	0.02267	3.1	9		K.VDPEIQNVKAQEREQIK.T	[167-183]
		Checked	Confidence	Identifying Node	PSM Ambiguity	Annotated Sequence	Modifications	# Protein Groups	# Proteins	Master Protein Accessions	Protein Accessions	# Missed Cleavages	Charge	DeltaScore	DeltaCn	Rank	Search Engine Rank	m/z [Da]	MH+ [Da]	Theo. MH+ [Da]	DeltaM [ppm]	Deltam/z [Da]	Activation Type	MS Order	Isolation Interference [%]	Ion Inject Time [ms]	RT [min]	First Scan	Spectrum File	File ID	Quan Info	XCorr	Ions Score	Contaminant	Identity Strict	Identity Relaxed	Expectation Value	Percolator q-Value	Percolator PEP	Precursor Abundance	Apex RT [min]	Identifying Node			Identifying No	ntifying	tifying	tifying	DeltaM [ppm]
		FALSE	High	Sequest HT (A2)	Unambiguous	[K].VDPEIQNVKAQEREQIK.[T]		1	1	P35908	P35908	2	4	0.3502	0	1	1	506.775	2024.08	2024.08	0.84	0.00042	HCD (High Energy Collision Dissociation)	MS2	40.8831	30	29.0512	15126	01082019_Fusion_MASSFIITB_307198_S2.raw	F2		2.97		FALSE				0	0.000644	10853685	29.08	Sequest HT (A2)			Sequest HT (A2	uest HT	est HT	est HT	0.84
		FALSE	High	Sequest HT (A2)	Selected	[K].VDPEIQNVKAQEREQIK.[T]		1	1	P35908	P35908	2	4	0.4839	0	1	1	506.775	2024.08	2024.08	1.1	0.00055	HCD (High Energy Collision Dissociation)	MS2	29.1712	28.833	28.968	15298	01082019_Fusion_MASSFIITB_307198_S5.raw	F5		3.1		FALSE				0.0007429	0.02267	6.08692e+06	28.99	Sequest HT (A2)			Sequest HT (A2	uest HT	est HT	est HT	1.1
	FALSE	High	[K].VELQSKVDLLNQEIEFLK.[V]			FALSE	1	1	2	P35908	P35908 [297-314]	1	2145.18	0		141.6		758.4							Not Found	Peak Found	Not Found	High	Not Found	Not Found	Not Found	Not Found	Not Found	High	High	0	0	1.732e-06	2.644e-08	5.11	53		K.VELQSKVDLLNQEIEFLK.V	[297-314]
		Checked	Confidence	Identifying Node	PSM Ambiguity	Annotated Sequence	Modifications	# Protein Groups	# Proteins	Master Protein Accessions	Protein Accessions	# Missed Cleavages	Charge	DeltaScore	DeltaCn	Rank	Search Engine Rank	m/z [Da]	MH+ [Da]	Theo. MH+ [Da]	DeltaM [ppm]	Deltam/z [Da]	Activation Type	MS Order	Isolation Interference [%]	Ion Inject Time [ms]	RT [min]	First Scan	Spectrum File	File ID	Quan Info	XCorr	Ions Score	Contaminant	Identity Strict	Identity Relaxed	Expectation Value	Percolator q-Value	Percolator PEP	Precursor Abundance	Apex RT [min]	Identifying Node			Identifying No	ntifying	tifying	tifying	DeltaM [ppm]
		FALSE	High	Sequest HT (A2)	Unambiguous	[K].VELQSKVDLLNQEIEFLK.[V]		1	1	P35908	P35908	1	3	0.6086	0	1	1	715.731	2145.18	2145.18	-0.43	-0.00031	HCD (High Energy Collision Dissociation)	MS2	19.3896	30	65.3945	47007	01082019_Fusion_MASSFIITB_307198_S4.raw	F4		5.11		FALSE				0	2.644e-08	7582054	65.38	Sequest HT (A2)			Sequest HT (A2	uest HT	est HT	est HT	-0.43
		FALSE	High	Mascot (A5)	Unambiguous	[K].VELQSKVDLLNQEIEFLK.[V]		1	1	P35908	P35908	1	3	1	0	1	1	715.731	2145.18	2145.18	-0.43	-0.00031	HCD (High Energy Collision Dissociation)	MS2	19.3896	30	65.3945	47007	01082019_Fusion_MASSFIITB_307198_S4.raw	F4			53	FALSE	51	33	6.95883e-05	0	1.732e-06	7582054	65.38	Mascot (A5)			Mascot (A5)	cot (A5)	ot (A5)	ot (A5)	-0.43
	FALSE	High	[K].YEELQVTVGR.[H]			FALSE	1	1	15	P35908	P35908 [375-384]	0	1193.62	0	84.9	79.5	104.1	331.2	128.3	123.2		33.5	15.4		High	High	High	High	High	Peak Found	Not Found	Peak Found	Peak Found	High	High	0	0	0.0009789	0.0008765	2.91	47		K.YEELQVTVGR.H	[375-384]
		Checked	Confidence	Identifying Node	PSM Ambiguity	Annotated Sequence	Modifications	# Protein Groups	# Proteins	Master Protein Accessions	Protein Accessions	# Missed Cleavages	Charge	DeltaScore	DeltaCn	Rank	Search Engine Rank	m/z [Da]	MH+ [Da]	Theo. MH+ [Da]	DeltaM [ppm]	Deltam/z [Da]	Activation Type	MS Order	Isolation Interference [%]	Ion Inject Time [ms]	RT [min]	First Scan	Spectrum File	File ID	Quan Info	XCorr	Ions Score	Contaminant	Identity Strict	Identity Relaxed	Expectation Value	Percolator q-Value	Percolator PEP	Precursor Abundance	Apex RT [min]	Identifying Node			Identifying No	ntifying	tifying	tifying	DeltaM [ppm]
		FALSE	High	Sequest HT (A2)	Unambiguous	[K].YEELQVTVGR.[H]		1	1	P35908	P35908	0	2	0.6838	0	1	1	597.312	1193.62	1193.62	0.51	0.00031	HCD (High Energy Collision Dissociation)	MS2	3.97287	9.971	42.4927	26889	01082019_Fusion_MASSFIITB_307198_S4.raw	F4		2.53		FALSE				0	8.517e-05	878297664	41.38	Sequest HT (A2)			Sequest HT (A2	uest HT	est HT	est HT	0.51
		FALSE	High	Mascot (A5)	Unambiguous	[K].YEELQVTVGR.[H]		1	1	P35908	P35908	0	2	0.9565	0	1	1	597.312	1193.62	1193.62	0.51	0.00031	HCD (High Energy Collision Dissociation)	MS2	3.97287	9.971	42.4927	26889	01082019_Fusion_MASSFIITB_307198_S4.raw	F4			69	FALSE	55	37	4.21225e-06	0	0.0001707	878297664	41.38	Mascot (A5)			Mascot (A5)	cot (A5)	ot (A5)	ot (A5)	0.51
		FALSE	High	Sequest HT (A2)	Unambiguous	[K].YEELQVTVGR.[H]		1	1	P35908	P35908	0	2	0.668	0	1	1	597.312	1193.62	1193.62	0.18	0.00011	HCD (High Energy Collision Dissociation)	MS2	21.1796	11.496	41.2282	25438	01082019_Fusion_MASSFIITB_307198_S2.raw	F2		2.53		FALSE				0	0.0001755	151922192	41.38	Sequest HT (A2)			Sequest HT (A2	uest HT	est HT	est HT	0.18
		FALSE	High	Mascot (A5)	Unambiguous	[K].YEELQVTVGR.[H]		1	1	P35908	P35908	0	2	0.9571	0	1	1	597.312	1193.62	1193.62	0.62	0.00037	HCD (High Energy Collision Dissociation)	MS2	31.0565	18.476	41.2215	25509	01082019_Fusion_MASSFIITB_307198_S1.raw	F1			70	FALSE	55	37	3.09136e-06	0	0.0002203	61280344	41.35	Mascot (A5)			Mascot (A5)	cot (A5)	ot (A5)	ot (A5)	0.62
		FALSE	High	Sequest HT (A2)	Unambiguous	[K].YEELQVTVGR.[H]		1	1	P35908	P35908	0	2	0.6157	0	1	1	597.312	1193.62	1193.62	0.62	0.00037	HCD (High Energy Collision Dissociation)	MS2	31.0565	18.476	41.2215	25509	01082019_Fusion_MASSFIITB_307198_S1.raw	F1		2.29		FALSE				0	0.0002539	61280344	41.35	Sequest HT (A2)			Sequest HT (A2	uest HT	est HT	est HT	0.62
		FALSE	High	Sequest HT (A2)	Unambiguous	[K].YEELQVTVGR.[H]		1	1	P35908	P35908	0	2	0.7004	0	1	1	597.312	1193.62	1193.62	1.22	0.00073	HCD (High Energy Collision Dissociation)	MS2	27.9721	13.204	43.1889	27500	01082019_Fusion_MASSFIITB_307198_S4.raw	F4		2.37		FALSE				0	0.0003248			Sequest HT (A2)			Sequest HT (A2	uest HT	est HT	est HT	1.22
		FALSE	High	Mascot (A5)	Unambiguous	[K].YEELQVTVGR.[H]		1	1	P35908	P35908	0	2	0.9583	0	1	1	597.311	1193.62	1193.62	-0.39	-0.00023	HCD (High Energy Collision Dissociation)	MS2	6.18606	16.584	41.8142	26313	01082019_Fusion_MASSFIITB_307198_S4.raw	F4			72	FALSE	55	37	1.94471e-06	0	0.0004	878297664	41.38	Mascot (A5)			Mascot (A5)	cot (A5)	ot (A5)	ot (A5)	-0.39
		FALSE	High	Mascot (A5)	Unambiguous	[K].YEELQVTVGR.[H]		1	1	P35908	P35908	0	2	0.9143	0	1	1	597.312	1193.62	1193.62	0.18	0.00011	HCD (High Energy Collision Dissociation)	MS2	21.1796	11.496	41.2282	25438	01082019_Fusion_MASSFIITB_307198_S2.raw	F2			70	FALSE	55	37	3.01657e-06	0	0.0004255	151922192	41.38	Mascot (A5)			Mascot (A5)	cot (A5)	ot (A5)	ot (A5)	0.18
		FALSE	High	Mascot (A5)	Unambiguous	[K].YEELQVTVGR.[H]		1	1	P35908	P35908	0	2	0.9492	0	1	1	597.312	1193.62	1193.62	1.22	0.00073	HCD (High Energy Collision Dissociation)	MS2	27.9721	13.204	43.1889	27500	01082019_Fusion_MASSFIITB_307198_S4.raw	F4			59	FALSE	54	37	3.92302e-05	0	0.0004606			Mascot (A5)			Mascot (A5)	cot (A5)	ot (A5)	ot (A5)	1.22
		FALSE	High	Sequest HT (A2)	Selected	[K].YEELQVTVGR.[H]		1	1	P35908	P35908	0	2	0.405	0	1	1	597.311	1193.61	1193.62	-0.97	-0.00058	HCD (High Energy Collision Dissociation)	MS2	27.2756	13.546	41.9738	26665	01082019_Fusion_MASSFIITB_307198_S3.raw	F3		2.42		FALSE				0	0.0004799	223064032	41.41	Sequest HT (A2)			Sequest HT (A2	uest HT	est HT	est HT	-0.97
		FALSE	High	Sequest HT (A2)	Selected	[K].YEELQVTVGR.[H]		1	1	P35908	P35908	0	2	0.6	0	1	1	597.312	1193.62	1193.62	0.47	0.00028	HCD (High Energy Collision Dissociation)	MS2	55.5031	23.5	41.221	26008	01082019_Fusion_MASSFIITB_307198_S3.raw	F3		2.55		FALSE				0	0.0006209	223064032	41.41	Sequest HT (A2)			Sequest HT (A2	uest HT	est HT	est HT	0.47
		FALSE	High	Sequest HT (A2)	Unambiguous	[K].YEELQVTVGR.[H]		1	1	P35908	P35908	0	2	0.6942	0	1	1	597.311	1193.62	1193.62	-0.39	-0.00023	HCD (High Energy Collision Dissociation)	MS2	6.18606	16.584	41.8142	26313	01082019_Fusion_MASSFIITB_307198_S4.raw	F4		2.91		FALSE				0	0.0008765	878297664	41.38	Sequest HT (A2)			Sequest HT (A2	uest HT	est HT	est HT	-0.39
		FALSE	High	Sequest HT (A2)	Selected	[K].YEELQVTVGR.[H]		1	1	P35908	P35908	0	2	0.6172	0	1	1	597.312	1193.62	1193.62	-0.07	-4e-05	HCD (High Energy Collision Dissociation)	MS2	53.4025	6.559	41.1394	25732	01082019_Fusion_MASSFIITB_307198_S4.raw	F4		2.56		FALSE				0	0.0009093	878297664	41.38	Sequest HT (A2)			Sequest HT (A2	uest HT	est HT	est HT	-0.07
		FALSE	High	Sequest HT (A2)	Selected	[K].YEELQVTVGR.[H]		1	1	P35908	P35908	0	2	0.5485	0	1	1	597.312	1193.62	1193.62	0.99	0.00059	HCD (High Energy Collision Dissociation)	MS2	12.9645	23.5	41.9889	26100	01082019_Fusion_MASSFIITB_307198_S5.raw	F5		2.37		FALSE				0	0.0009378	206553872	41.42	Sequest HT (A2)			Sequest HT (A2	uest HT	est HT	est HT	0.99
		FALSE	High	Sequest HT (A2)	Selected	[K].YEELQVTVGR.[H]		1	1	P35908	P35908	0	2	0.6255	0	1	1	597.312	1193.62	1193.62	-0.05	-3e-05	HCD (High Energy Collision Dissociation)	MS2	49.6657	3.643	41.2976	25502	01082019_Fusion_MASSFIITB_307198_S5.raw	F5		2.35		FALSE				0	0.007684	206553872	41.42	Sequest HT (A2)			Sequest HT (A2	uest HT	est HT	est HT	-0.05
	FALSE	High	[R].YGSGGGSKGGSISGGGYGSGGGK.[H]			FALSE	1	1	5	P35908	P35908 [573-595]	1	1890.86	0	78.6	119	126.5	141.7	135.1	66.2	111	122			Peak Found	High	High	High	High	Peak Found	Peak Found	Peak Found	Not Found	High	High	0	0	0.002088	0.001285	3.55	47		R.YGSGGGSKGGSISGGGYGSGGGK.H	[573-595]					111
		Checked	Confidence	Identifying Node	PSM Ambiguity	Annotated Sequence	Modifications	# Protein Groups	# Proteins	Master Protein Accessions	Protein Accessions	# Missed Cleavages	Charge	DeltaScore	DeltaCn	Rank	Search Engine Rank	m/z [Da]	MH+ [Da]	Theo. MH+ [Da]	DeltaM [ppm]	Deltam/z [Da]	Activation Type	MS Order	Isolation Interference [%]	Ion Inject Time [ms]	RT [min]	First Scan	Spectrum File	File ID	Quan Info	XCorr	Ions Score	Contaminant	Identity Strict	Identity Relaxed	Expectation Value	Percolator q-Value	Percolator PEP	Precursor Abundance	Apex RT [min]	Identifying Node			Identifying No	ntifying	tifying	tifying	DeltaM [ppm]
		FALSE	High	Sequest HT (A2)	Selected	[R].YGSGGGSKGGSISGGGYGSGGGK.[H]		1	1	P35908	P35908	1	3	0.6687	0	1	1	630.957	1890.86	1890.86	-0.46	-0.00029	HCD (High Energy Collision Dissociation)	MS2	0	30	20.3679	8020	01082019_Fusion_MASSFIITB_307198_S2.raw	F2		3.23		FALSE				0	0.001256	59637396	20.51	Sequest HT (A2)			Sequest HT (A2	uest HT	est HT	est HT	-0.46
		FALSE	High	Sequest HT (A2)	Unambiguous	[R].YGSGGGSKGGSISGGGYGSGGGK.[H]		1	1	P35908	P35908	1	3	0.6986	0	1	1	630.958	1890.86	1890.86	1.31	0.00082	HCD (High Energy Collision Dissociation)	MS2	0	30	20.371	8364	01082019_Fusion_MASSFIITB_307198_S4.raw	F4		3.55		FALSE				0	0.001285	98528216	20.47	Sequest HT (A2)			Sequest HT (A2	uest HT	est HT	est HT	1.31
		FALSE	High	Mascot (A5)	Unambiguous	[R].YGSGGGSKGGSISGGGYGSGGGK.[H]		1	1	P35908	P35908	1	3	0.9455	0	1	1	630.958	1890.86	1890.86	1.31	0.00082	HCD (High Energy Collision Dissociation)	MS2	0	30	20.371	8364	01082019_Fusion_MASSFIITB_307198_S4.raw	F4			55	FALSE	49	31	2.74046e-05	0	0.004203	98528216	20.47	Mascot (A5)			Mascot (A5)	cot (A5)	ot (A5)	ot (A5)	1.31
		FALSE	High	Sequest HT (A2)	Selected	[R].YGSGGGSKGGSISGGGYGSGGGK.[H]		1	1	P35908	P35908	1	3	0.6455	0	1	1	630.958	1890.86	1890.86	1.25	0.00079	HCD (High Energy Collision Dissociation)	MS2	0	30	20.3177	8403	01082019_Fusion_MASSFIITB_307198_S3.raw	F3		2.99		FALSE				0	0.0078	71073024	20.47	Sequest HT (A2)			Sequest HT (A2	uest HT	est HT	est HT	1.25
		FALSE	High	Sequest HT (A2)	Selected	[R].YGSGGGSKGGSISGGGYGSGGGK.[H]		1	1	P35908	P35908	1	3	0.6698	0	1	1	630.958	1890.86	1890.86	0.22	0.00014	HCD (High Energy Collision Dissociation)	MS2	0	30	20.2763	8173	01082019_Fusion_MASSFIITB_307198_S5.raw	F5		3.21		FALSE				0	0.01203	57026676	20.39	Sequest HT (A2)			Sequest HT (A2	uest HT	est HT	est HT	0.22
	FALSE	High	[R].YGSGGGSKGGSISGGGYGSGGGKHSSGGGSR.[G]			FALSE	1	1	8	P35908	P35908 [573-603]	2	2616.18	0	17.6	226.3	107.8	341.9	206.5						Peak Found	High	High	High	High	Not Found	Not Found	Not Found	Not Found	High	High	0	0	0.0008564	4.708e-06	6.7	34		R.YGSGGGSKGGSISGGGYGSGGGKHSSGGGSR.G	[573-603]
		Checked	Confidence	Identifying Node	PSM Ambiguity	Annotated Sequence	Modifications	# Protein Groups	# Proteins	Master Protein Accessions	Protein Accessions	# Missed Cleavages	Charge	DeltaScore	DeltaCn	Rank	Search Engine Rank	m/z [Da]	MH+ [Da]	Theo. MH+ [Da]	DeltaM [ppm]	Deltam/z [Da]	Activation Type	MS Order	Isolation Interference [%]	Ion Inject Time [ms]	RT [min]	First Scan	Spectrum File	File ID	Quan Info	XCorr	Ions Score	Contaminant	Identity Strict	Identity Relaxed	Expectation Value	Percolator q-Value	Percolator PEP	Precursor Abundance	Apex RT [min]	Identifying Node			Identifying No	ntifying	tifying	tifying	DeltaM [ppm]
		FALSE	High	Sequest HT (A2)	Selected	[R].YGSGGGSKGGSISGGGYGSGGGKHSSGGGSR.[G]		1	1	P35908	P35908	2	4	0.7057	0	1	1	654.8	2616.18	2616.18	0.12	8e-05	HCD (High Energy Collision Dissociation)	MS2	11.3489	30	16.2308	4737	01082019_Fusion_MASSFIITB_307198_S5.raw	F5		6.49		FALSE				0	7.782e-11	9183805	16.24	Sequest HT (A2)			Sequest HT (A2	uest HT	est HT	est HT	0.12
		FALSE	High	Sequest HT (A2)	Selected	[R].YGSGGGSKGGSISGGGYGSGGGKHSSGGGSR.[G]		1	1	P35908	P35908	2	4	0.7109	0	1	1	654.8	2616.18	2616.18	0.73	0.00048	HCD (High Energy Collision Dissociation)	MS2	5.1639	18.056	16.1262	4766	01082019_Fusion_MASSFIITB_307198_S4.raw	F4		6.33		FALSE				0	3.404e-07	26660918	16.16	Sequest HT (A2)			Sequest HT (A2	uest HT	est HT	est HT	0.73
		FALSE	High	Sequest HT (A2)	Selected	[R].YGSGGGSKGGSISGGGYGSGGGKHSSGGGSR.[G]		1	1	P35908	P35908	2	5	0.6609	0	1	1	524.042	2616.18	2616.18	0.19	0.0001	HCD (High Energy Collision Dissociation)	MS2	12.479	30	16.1049	4746	01082019_Fusion_MASSFIITB_307198_S4.raw	F4		5.19		FALSE				0	6.113e-07	19970220	16.16	Sequest HT (A2)			Sequest HT (A2	uest HT	est HT	est HT	0.19
		FALSE	High	Sequest HT (A2)	Selected	[R].YGSGGGSKGGSISGGGYGSGGGKHSSGGGSR.[G]		1	1	P35908	P35908	2	5	0.7426	0	1	1	524.042	2616.18	2616.18	0.61	0.00032	HCD (High Energy Collision Dissociation)	MS2	5.16138	30	16.1436	4656	01082019_Fusion_MASSFIITB_307198_S2.raw	F2		5.09		FALSE				0	7.352e-07	11276400	16.2	Sequest HT (A2)			Sequest HT (A2	uest HT	est HT	est HT	0.61
		FALSE	High	Sequest HT (A2)	Selected	[R].YGSGGGSKGGSISGGGYGSGGGKHSSGGGSR.[G]		1	1	P35908	P35908	2	5	0.6388	0	1	1	524.041	2616.18	2616.18	-0.03	-1e-05	HCD (High Energy Collision Dissociation)	MS2	0.921013	30	16.2331	4738	01082019_Fusion_MASSFIITB_307198_S5.raw	F5		6.7		FALSE				0	4.708e-06	7.91472e+06	16.24	Sequest HT (A2)			Sequest HT (A2	uest HT	est HT	est HT	-0.03
		FALSE	High	Sequest HT (A2)	Selected	[R].YGSGGGSKGGSISGGGYGSGGGKHSSGGGSR.[G]		1	1	P35908	P35908	2	5	0.7052	0	1	1	524.041	2616.18	2616.18	-0.29	-0.00015	HCD (High Energy Collision Dissociation)	MS2	10.9695	30	16.2154	4939	01082019_Fusion_MASSFIITB_307198_S3.raw	F3		4.24		FALSE				0	3.763e-05	5.15322e+06	16.25	Sequest HT (A2)			Sequest HT (A2	uest HT	est HT	est HT	-0.29
		FALSE	High	Sequest HT (A2)	Selected	[R].YGSGGGSKGGSISGGGYGSGGGKHSSGGGSR.[G]		1	1	P35908	P35908	2	4	0.6981	0	1	1	654.801	2616.18	2616.18	1.02	0.00067	HCD (High Energy Collision Dissociation)	MS2	14.7777	30	16.2132	4938	01082019_Fusion_MASSFIITB_307198_S3.raw	F3		4.14		FALSE				0	0.00022	6.72593e+06	16.25	Sequest HT (A2)			Sequest HT (A2	uest HT	est HT	est HT	1.02
		FALSE	High	Sequest HT (A2)	Selected	[R].YGSGGGSKGGSISGGGYGSGGGKHSSGGGSR.[G]		1	1	P35908	P35908	2	4	0.6918	0	1	1	654.801	2616.18	2616.18	0.97	0.00063	HCD (High Energy Collision Dissociation)	MS2	15.9462	30	16.1459	4657	01082019_Fusion_MASSFIITB_307198_S2.raw	F2		4.77		FALSE				0	0.0003022	10975440	16.19	Sequest HT (A2)			Sequest HT (A2	uest HT	est HT	est HT	0.97
	FALSE	High	[K].VDPEIQNVKAQER.[E]			FALSE	1	1	2	P35908	P35908 [167-179]	1	1525.8	0	67.5	158.1	171.3	128	92.4	70.2	120.9	91.6			Peak Found	Peak Found	High	High	Peak Found	Peak Found	Peak Found	Peak Found	Not Found	High	High	0	0	0.00666	2.639e-05	3.41	25		K.VDPEIQNVKAQER.E	[167-179]					120.9
		Checked	Confidence	Identifying Node	PSM Ambiguity	Annotated Sequence	Modifications	# Protein Groups	# Proteins	Master Protein Accessions	Protein Accessions	# Missed Cleavages	Charge	DeltaScore	DeltaCn	Rank	Search Engine Rank	m/z [Da]	MH+ [Da]	Theo. MH+ [Da]	DeltaM [ppm]	Deltam/z [Da]	Activation Type	MS Order	Isolation Interference [%]	Ion Inject Time [ms]	RT [min]	First Scan	Spectrum File	File ID	Quan Info	XCorr	Ions Score	Contaminant	Identity Strict	Identity Relaxed	Expectation Value	Percolator q-Value	Percolator PEP	Precursor Abundance	Apex RT [min]	Identifying Node			Identifying No	ntifying	tifying	tifying	DeltaM [ppm]
		FALSE	High	Sequest HT (A2)	Selected	[K].VDPEIQNVKAQER.[E]		1	1	P35908	P35908	1	3	0.5559	0	1	1	509.27	1525.8	1525.8	-1.08	-0.00055	HCD (High Energy Collision Dissociation)	MS2	38.61	30	27.2483	14203	01082019_Fusion_MASSFIITB_307198_S3.raw	F3		3.22		FALSE				0	2.028e-05	28657174	27.27	Sequest HT (A2)			Sequest HT (A2	uest HT	est HT	est HT	-1.08
		FALSE	High	Sequest HT (A2)	Selected	[K].VDPEIQNVKAQER.[E]		1	1	P35908	P35908	1	3	0.5718	0	1	1	509.27	1525.8	1525.8	-1.05	-0.00054	HCD (High Energy Collision Dissociation)	MS2	8.16336	30	27.2999	14037	01082019_Fusion_MASSFIITB_307198_S4.raw	F4		3.41		FALSE				0	2.639e-05	26490322	27.34	Sequest HT (A2)			Sequest HT (A2	uest HT	est HT	est HT	-1.05
	FALSE	High	[K].VDPEIQNVK.[A]			FALSE	1	1	1	P35908	P35908 [167-175]	0	1041.56	0	97.7	104.1	145.8	180.4	100	76.4	103.7	91.9			Peak Found	Peak Found	Peak Found	Peak Found	High	Peak Found	Peak Found	Peak Found	Not Found	High	High	0	0.009068	0.01332	0.1059	2.32	30		K.VDPEIQNVK.A	[167-175]					103.7
		Checked	Confidence	Identifying Node	PSM Ambiguity	Annotated Sequence	Modifications	# Protein Groups	# Proteins	Master Protein Accessions	Protein Accessions	# Missed Cleavages	Charge	DeltaScore	DeltaCn	Rank	Search Engine Rank	m/z [Da]	MH+ [Da]	Theo. MH+ [Da]	DeltaM [ppm]	Deltam/z [Da]	Activation Type	MS Order	Isolation Interference [%]	Ion Inject Time [ms]	RT [min]	First Scan	Spectrum File	File ID	Quan Info	XCorr	Ions Score	Contaminant	Identity Strict	Identity Relaxed	Expectation Value	Percolator q-Value	Percolator PEP	Precursor Abundance	Apex RT [min]	Identifying Node			Identifying No	ntifying	tifying	tifying	DeltaM [ppm]
		FALSE	High	Sequest HT (A2)	Selected	[K].VDPEIQNVK.[A]		1	1	P35908	P35908	0	2	0.5086	0	1	1	521.283	1041.56	1041.56	0.29	0.00015	HCD (High Energy Collision Dissociation)	MS2	24.7973	30	29.0241	15347	01082019_Fusion_MASSFIITB_307198_S5.raw	F5		2.32		FALSE				0.009068	0.1059	597555648	29.12	Sequest HT (A2)			Sequest HT (A2	uest HT	est HT	est HT	0.29
	FALSE	High	[K].VDLLNQEIEFLK.[V]			FALSE	1	1	17	P35908	P35908 [303-314]	0	1460.8	0	135.6	111.3	158.9	166.6	146.2	146.3	11.4	23.7			High	High	High	High	High	High	Peak Found	High	Not Found	High	High	0	0	0.0002095	7.181e-06	3.91	52		K.VDLLNQEIEFLK.V	[303-314]					11.4
		Checked	Confidence	Identifying Node	PSM Ambiguity	Annotated Sequence	Modifications	# Protein Groups	# Proteins	Master Protein Accessions	Protein Accessions	# Missed Cleavages	Charge	DeltaScore	DeltaCn	Rank	Search Engine Rank	m/z [Da]	MH+ [Da]	Theo. MH+ [Da]	DeltaM [ppm]	Deltam/z [Da]	Activation Type	MS Order	Isolation Interference [%]	Ion Inject Time [ms]	RT [min]	First Scan	Spectrum File	File ID	Quan Info	XCorr	Ions Score	Contaminant	Identity Strict	Identity Relaxed	Expectation Value	Percolator q-Value	Percolator PEP	Precursor Abundance	Apex RT [min]	Identifying Node			Identifying No	ntifying	tifying	tifying	DeltaM [ppm]
		FALSE	High	Mascot (A5)	Unambiguous	[K].VDLLNQEIEFLK.[V]		1	1	P35908	P35908	0	2	0.9394	0	1	1	730.904	1460.8	1460.8	0.23	0.00017	HCD (High Energy Collision Dissociation)	MS2	6.22535	30	67.4834	47188	01082019_Fusion_MASSFIITB_307198_S8.raw	F8			99	FALSE	54	36	3.4697e-09	0	2.522e-07	10511486	67.51	Mascot (A5)			Mascot (A5)	cot (A5)	ot (A5)	ot (A5)	0.23
		FALSE	High	Sequest HT (A2)	Unambiguous	[K].VDLLNQEIEFLK.[V]		1	1	P35908	P35908	0	2	0.6372	0	1	1	730.904	1460.8	1460.8	0.23	0.00017	HCD (High Energy Collision Dissociation)	MS2	6.22535	30	67.4834	47188	01082019_Fusion_MASSFIITB_307198_S8.raw	F8		3.17		FALSE				0	1.022e-06	10511486	67.51	Sequest HT (A2)			Sequest HT (A2	uest HT	est HT	est HT	0.23
		FALSE	High	Sequest HT (A2)	Unambiguous	[K].VDLLNQEIEFLK.[V]		1	1	P35908	P35908	0	2	0.6568	0	1	1	730.904	1460.8	1460.8	0.15	0.00011	HCD (High Energy Collision Dissociation)	MS2	4.53704	3.076	67.4717	48720	01082019_Fusion_MASSFIITB_307198_S5.raw	F5		3.38		FALSE				0	1.709e-06	295346720	67.52	Sequest HT (A2)			Sequest HT (A2	uest HT	est HT	est HT	0.15
		FALSE	High	Sequest HT (A2)	Unambiguous	[K].VDLLNQEIEFLK.[V]		1	1	P35908	P35908	0	2	0.6274	0	1	1	730.903	1460.8	1460.8	0.09	7e-05	HCD (High Energy Collision Dissociation)	MS2	33.5348	28.09	67.4316	49050	01082019_Fusion_MASSFIITB_307198_S1.raw	F1		3.65		FALSE				0	4.669e-06	123450416	67.48	Sequest HT (A2)			Sequest HT (A2	uest HT	est HT	est HT	0.09
		FALSE	High	Sequest HT (A2)	Unambiguous	[K].VDLLNQEIEFLK.[V]		1	1	P35908	P35908	0	2	0.6036	0	1	1	730.904	1460.8	1460.8	0.61	0.00045	HCD (High Energy Collision Dissociation)	MS2	12.3241	23.5	67.3931	49325	01082019_Fusion_MASSFIITB_307198_S3.raw	F3		3.91		FALSE				0	7.181e-06	210451120	67.46	Sequest HT (A2)			Sequest HT (A2	uest HT	est HT	est HT	0.61
		FALSE	High	Mascot (A5)	Unambiguous	[K].VDLLNQEIEFLK.[V]		1	1	P35908	P35908	0	2	0.9811	0	1	1	730.904	1460.8	1460.8	0.15	0.00011	HCD (High Energy Collision Dissociation)	MS2	4.53704	3.076	67.4717	48720	01082019_Fusion_MASSFIITB_307198_S5.raw	F5			106	FALSE	54	36	7.01927e-10	0	7.974e-06	295346720	67.52	Mascot (A5)			Mascot (A5)	cot (A5)	ot (A5)	ot (A5)	0.15
		FALSE	High	Sequest HT (A2)	Unambiguous	[K].VDLLNQEIEFLK.[V]		1	1	P35908	P35908	0	2	0.6331	0	1	1	730.904	1460.8	1460.8	0.71	0.00052	HCD (High Energy Collision Dissociation)	MS2	24.924	8.813	68.0748	49969	01082019_Fusion_MASSFIITB_307198_S3.raw	F3		3.08		FALSE				0	1.303e-05	216463296	68.2	Sequest HT (A2)			Sequest HT (A2	uest HT	est HT	est HT	0.71
		FALSE	High	Sequest HT (A2)	Unambiguous	[K].VDLLNQEIEFLK.[V]		1	1	P35908	P35908	0	2	0.6381	0	1	1	730.904	1460.8	1460.8	0.57	0.00042	HCD (High Energy Collision Dissociation)	MS2	7.0263	14.393	67.4633	46709	01082019_Fusion_MASSFIITB_307198_S6.raw	F6		3.62		FALSE				0	1.401e-05	100091536	67.49	Sequest HT (A2)			Sequest HT (A2	uest HT	est HT	est HT	0.57
		FALSE	High	Mascot (A5)	Unambiguous	[K].VDLLNQEIEFLK.[V]		1	1	P35908	P35908	0	2	0.9286	0	1	1	730.904	1460.8	1460.8	0.71	0.00052	HCD (High Energy Collision Dissociation)	MS2	24.924	8.813	68.0748	49969	01082019_Fusion_MASSFIITB_307198_S3.raw	F3			70	FALSE	53	36	2.63907e-06	0	1.658e-05	216463296	68.2	Mascot (A5)			Mascot (A5)	cot (A5)	ot (A5)	ot (A5)	0.71
		FALSE	High	Mascot (A5)	Unambiguous	[K].VDLLNQEIEFLK.[V]		1	1	P35908	P35908	0	2	0.9612	0	1	1	730.904	1460.8	1460.8	0.57	0.00042	HCD (High Energy Collision Dissociation)	MS2	7.0263	14.393	67.4633	46709	01082019_Fusion_MASSFIITB_307198_S6.raw	F6			103	FALSE	53	36	1.27483e-09	0	2.092e-05	100091536	67.49	Mascot (A5)			Mascot (A5)	cot (A5)	ot (A5)	ot (A5)	0.57
		FALSE	High	Sequest HT (A2)	Unambiguous	[K].VDLLNQEIEFLK.[V]		1	1	P35908	P35908	0	2	0.6354	0	1	1	730.903	1460.8	1460.8	0.1	7e-05	HCD (High Energy Collision Dissociation)	MS2	16.8489	23.5	67.4825	49183	01082019_Fusion_MASSFIITB_307198_S2.raw	F2		3.73		FALSE				0	3.784e-05	268277856	67.53	Sequest HT (A2)			Sequest HT (A2	uest HT	est HT	est HT	0.1
		FALSE	High	Mascot (A5)	Unambiguous	[K].VDLLNQEIEFLK.[V]		1	1	P35908	P35908	0	2	0.9469	0	1	1	730.903	1460.8	1460.8	0.09	7e-05	HCD (High Energy Collision Dissociation)	MS2	33.5348	28.09	67.4316	49050	01082019_Fusion_MASSFIITB_307198_S1.raw	F1			113	FALSE	54	36	1.42985e-10	0	4.596e-05	123450416	67.48	Mascot (A5)			Mascot (A5)	cot (A5)	ot (A5)	ot (A5)	0.09
		FALSE	High	Mascot (A5)	Unambiguous	[K].VDLLNQEIEFLK.[V]		1	1	P35908	P35908	0	2	0.9823	0	1	1	730.903	1460.8	1460.8	0.1	7e-05	HCD (High Energy Collision Dissociation)	MS2	16.8489	23.5	67.4825	49183	01082019_Fusion_MASSFIITB_307198_S2.raw	F2			113	FALSE	54	36	1.37813e-10	0	4.717e-05	268277856	67.53	Mascot (A5)			Mascot (A5)	cot (A5)	ot (A5)	ot (A5)	0.1
		FALSE	High	Mascot (A5)	Unambiguous	[K].VDLLNQEIEFLK.[V]		1	1	P35908	P35908	0	2	0.92	0	1	1	730.904	1460.8	1460.8	0.15	0.00011	HCD (High Energy Collision Dissociation)	MS2	13.4434	6.678	67.432	48926	01082019_Fusion_MASSFIITB_307198_S4.raw	F4			100	FALSE	54	36	3.24558e-09	0	4.752e-05	552569216	67.49	Mascot (A5)			Mascot (A5)	cot (A5)	ot (A5)	ot (A5)	0.15
		FALSE	High	Sequest HT (A2)	Unambiguous	[K].VDLLNQEIEFLK.[V]		1	1	P35908	P35908	0	2	0.6382	0	1	1	730.904	1460.8	1460.8	0.15	0.00011	HCD (High Energy Collision Dissociation)	MS2	13.4434	6.678	67.432	48926	01082019_Fusion_MASSFIITB_307198_S4.raw	F4		3.51		FALSE				0	5.125e-05	552569216	67.49	Sequest HT (A2)			Sequest HT (A2	uest HT	est HT	est HT	0.15
		FALSE	High	Sequest HT (A2)	Selected	[K].VDLLNQEIEFLK.[V]		1	1	P35908	P35908	0	2	0.5523	0	1	1	730.903	1460.8	1460.8	-0.34	-0.00025	HCD (High Energy Collision Dissociation)	MS2	11.3145	30	68.7443	50152	01082019_Fusion_MASSFIITB_307198_S4.raw	F4		2.77		FALSE				0	5.248e-05	4.80047e+06	68.72	Sequest HT (A2)			Sequest HT (A2	uest HT	est HT	est HT	-0.34
		FALSE	High	Mascot (A5)	Unambiguous	[K].VDLLNQEIEFLK.[V]		1	1	P35908	P35908	0	2	0.99	0	1	1	730.904	1460.8	1460.8	0.61	0.00045	HCD (High Energy Collision Dissociation)	MS2	12.3241	23.5	67.3931	49325	01082019_Fusion_MASSFIITB_307198_S3.raw	F3			100	FALSE	53	36	2.67579e-09	0	5.686e-05	210451120	67.46	Mascot (A5)			Mascot (A5)	cot (A5)	ot (A5)	ot (A5)	0.61
	FALSE	High	[R].STSSFSCLSR.[H]	1xCarbamidomethyl [C7]		FALSE	1	1	2	P35908	P35908 [36-45]	0	1131.51	0	62.3	58.5	70.2	99.5	81.3	128.9	213.9	185.3			Peak Found	Peak Found	Peak Found	Peak Found	High	High	Peak Found	Peak Found	Not Found	High	High	0	0.0002645	0.003242	0.01623	2.19	53	xCarbamidomethyl [C7]	R.STSSFSCLSR.H	[36-45]	xCarbamidometh	rbamidom	bamidom	bamidom	213.9
		Checked	Confidence	Identifying Node	PSM Ambiguity	Annotated Sequence	Modifications	# Protein Groups	# Proteins	Master Protein Accessions	Protein Accessions	# Missed Cleavages	Charge	DeltaScore	DeltaCn	Rank	Search Engine Rank	m/z [Da]	MH+ [Da]	Theo. MH+ [Da]	DeltaM [ppm]	Deltam/z [Da]	Activation Type	MS Order	Isolation Interference [%]	Ion Inject Time [ms]	RT [min]	First Scan	Spectrum File	File ID	Quan Info	XCorr	Ions Score	Contaminant	Identity Strict	Identity Relaxed	Expectation Value	Percolator q-Value	Percolator PEP	Precursor Abundance	Apex RT [min]	Identifying Node			Identifying No	ntifying	tifying	tifying	DeltaM [ppm]
		FALSE	High	Mascot (A5)	Selected	[R].STSSFScLSR.[H]	C7(Carbamidomethyl)	1	1	P35908	P35908	0	2	0.9811	0	1	1	566.259	1131.51	1131.51	-0.09	-5e-05	HCD (High Energy Collision Dissociation)	MS2	1.0141	7.191	31.2707	15607	01082019_Fusion_MASSFIITB_307198_S6.raw	F6			53	FALSE	48	30	3.5074e-05	0	0.003242	160050000	31.34	Mascot (A5)			Mascot (A5)	cot (A5)	ot (A5)	ot (A5)	-0.09
		FALSE	High	Mascot (A5)	Selected	[R].STSSFScLSR.[H]	C7(Carbamidomethyl)	1	1	P35908	P35908	0	2	0.9796	0	1	1	566.259	1131.51	1131.51	0.05	3e-05	HCD (High Energy Collision Dissociation)	MS2	0.652709	2.332	31.3153	17232	01082019_Fusion_MASSFIITB_307198_S5.raw	F5			49	FALSE	48	30	8.67568e-05	0	0.009584	295335328	31.31	Mascot (A5)			Mascot (A5)	cot (A5)	ot (A5)	ot (A5)	0.05
	FALSE	High	[R].TAAENDFVTLK.[K]			FALSE	1	1	12	P35908	P35908 [276-286]	0	1208.62	0	105.6	83.3	132.3	103.3	112.9	111.2	118.5	132.9			High	High	High	High	High	High	Peak Found	Peak Found	Not Found	High	High	0	0	0.0008182	1.836e-05	2.82	44		R.TAAENDFVTLK.K	[276-286]					118.5
		Checked	Confidence	Identifying Node	PSM Ambiguity	Annotated Sequence	Modifications	# Protein Groups	# Proteins	Master Protein Accessions	Protein Accessions	# Missed Cleavages	Charge	DeltaScore	DeltaCn	Rank	Search Engine Rank	m/z [Da]	MH+ [Da]	Theo. MH+ [Da]	DeltaM [ppm]	Deltam/z [Da]	Activation Type	MS Order	Isolation Interference [%]	Ion Inject Time [ms]	RT [min]	First Scan	Spectrum File	File ID	Quan Info	XCorr	Ions Score	Contaminant	Identity Strict	Identity Relaxed	Expectation Value	Percolator q-Value	Percolator PEP	Precursor Abundance	Apex RT [min]	Identifying Node			Identifying No	ntifying	tifying	tifying	DeltaM [ppm]
		FALSE	High	Sequest HT (A2)	Unambiguous	[R].TAAENDFVTLK.[K]		1	1	P35908	P35908	0	2	0.6773	0	1	1	604.811	1208.62	1208.62	-0.28	-0.00017	HCD (High Energy Collision Dissociation)	MS2	19.9201	17.67	41.4139	26179	01082019_Fusion_MASSFIITB_307198_S3.raw	F3		2.82		FALSE				0	1.836e-05	440046752	41.58	Sequest HT (A2)			Sequest HT (A2	uest HT	est HT	est HT	-0.28
		FALSE	High	Sequest HT (A2)	Unambiguous	[R].TAAENDFVTLK.[K]		1	1	P35908	P35908	0	2	0.6602	0	1	1	604.812	1208.62	1208.62	0.65	0.00039	HCD (High Energy Collision Dissociation)	MS2	33.3161	23.5	41.3859	25573	01082019_Fusion_MASSFIITB_307198_S2.raw	F2		2.59		FALSE				0	3.507e-05	247102944	41.56	Sequest HT (A2)			Sequest HT (A2	uest HT	est HT	est HT	0.65
		FALSE	High	Sequest HT (A2)	Unambiguous	[R].TAAENDFVTLK.[K]		1	1	P35908	P35908	0	2	0.6595	0	1	1	604.81	1208.61	1208.62	-1.79	-0.00108	HCD (High Energy Collision Dissociation)	MS2	38.5258	23.5	41.4464	25631	01082019_Fusion_MASSFIITB_307198_S5.raw	F5		2.79		FALSE				0	8.097e-05	282057760	41.62	Sequest HT (A2)			Sequest HT (A2	uest HT	est HT	est HT	-1.79
		FALSE	High	Mascot (A5)	Unambiguous	[R].TAAENDFVTLK.[K]		1	1	P35908	P35908	0	2	0.8846	0	1	1	604.811	1208.62	1208.62	-0.28	-0.00017	HCD (High Energy Collision Dissociation)	MS2	19.9201	17.67	41.4139	26179	01082019_Fusion_MASSFIITB_307198_S3.raw	F3			78	FALSE	54	36	4.23481e-07	0	9.75e-05	440046752	41.58	Mascot (A5)			Mascot (A5)	cot (A5)	ot (A5)	ot (A5)	-0.28
		FALSE	High	Mascot (A5)	Unambiguous	[R].TAAENDFVTLK.[K]		1	1	P35908	P35908	0	2	0.9565	0	1	1	604.812	1208.62	1208.62	0.65	0.00039	HCD (High Energy Collision Dissociation)	MS2	33.3161	23.5	41.3859	25573	01082019_Fusion_MASSFIITB_307198_S2.raw	F2			69	FALSE	54	36	2.8969e-06	0	0.0001224	247102944	41.56	Mascot (A5)			Mascot (A5)	cot (A5)	ot (A5)	ot (A5)	0.65
		FALSE	High	Mascot (A5)	Unambiguous	[R].TAAENDFVTLK.[K]		1	1	P35908	P35908	0	2	0.9524	0	1	1	604.81	1208.61	1208.62	-1.79	-0.00108	HCD (High Energy Collision Dissociation)	MS2	38.5258	23.5	41.4464	25631	01082019_Fusion_MASSFIITB_307198_S5.raw	F5			84	FALSE	53	35	9.64146e-08	0	0.000188	282057760	41.62	Mascot (A5)			Mascot (A5)	cot (A5)	ot (A5)	ot (A5)	-1.79
		FALSE	High	Mascot (A5)	Unambiguous	[R].TAAENDFVTLK.[K]		1	1	P35908	P35908	0	2	0.9286	0	1	1	604.813	1208.62	1208.62	3.1	0.00187	HCD (High Energy Collision Dissociation)	MS2	30.5792	30	41.468	23814	01082019_Fusion_MASSFIITB_307198_S6.raw	F6			56	FALSE	53	35	5.69004e-05	0	0.0002774	94322920	41.61	Mascot (A5)			Mascot (A5)	cot (A5)	ot (A5)	ot (A5)	3.1
		FALSE	High	Sequest HT (A2)	Unambiguous	[R].TAAENDFVTLK.[K]		1	1	P35908	P35908	0	2	0.6762	0	1	1	604.811	1208.61	1208.62	-0.85	-0.00051	HCD (High Energy Collision Dissociation)	MS2	15.262	23.5	41.4561	25717	01082019_Fusion_MASSFIITB_307198_S1.raw	F1		2.44		FALSE				0	0.0003352	118273696	41.56	Sequest HT (A2)			Sequest HT (A2	uest HT	est HT	est HT	-0.85
		FALSE	High	Mascot (A5)	Unambiguous	[R].TAAENDFVTLK.[K]		1	1	P35908	P35908	0	2	0.9403	0	1	1	604.811	1208.61	1208.62	-0.85	-0.00051	HCD (High Energy Collision Dissociation)	MS2	15.262	23.5	41.4561	25717	01082019_Fusion_MASSFIITB_307198_S1.raw	F1			67	FALSE	53	35	4.26884e-06	0	0.000443	118273696	41.56	Mascot (A5)			Mascot (A5)	cot (A5)	ot (A5)	ot (A5)	-0.85
		FALSE	High	Sequest HT (A2)	Unambiguous	[R].TAAENDFVTLK.[K]		1	1	P35908	P35908	0	2	0.6571	0	1	1	604.811	1208.61	1208.62	-0.82	-0.00049	HCD (High Energy Collision Dissociation)	MS2	36.7853	23.5	41.3924	25955	01082019_Fusion_MASSFIITB_307198_S4.raw	F4		2.8		FALSE				0	0.000454	424986304	41.57	Sequest HT (A2)			Sequest HT (A2	uest HT	est HT	est HT	-0.82
		FALSE	High	Sequest HT (A2)	Unambiguous	[R].TAAENDFVTLK.[K]		1	1	P35908	P35908	0	2	0.5896	0	1	1	604.813	1208.62	1208.62	3.1	0.00187	HCD (High Energy Collision Dissociation)	MS2	30.5792	30	41.468	23814	01082019_Fusion_MASSFIITB_307198_S6.raw	F6		2.51		FALSE				0	0.0007363	94322920	41.61	Sequest HT (A2)			Sequest HT (A2	uest HT	est HT	est HT	3.1
		FALSE	High	Mascot (A5)	Unambiguous	[R].TAAENDFVTLK.[K]		1	1	P35908	P35908	0	2	0.9385	0	1	1	604.811	1208.61	1208.62	-0.82	-0.00049	HCD (High Energy Collision Dissociation)	MS2	36.7853	23.5	41.3924	25955	01082019_Fusion_MASSFIITB_307198_S4.raw	F4			65	FALSE	53	35	7.45216e-06	0	0.0008144	424986304	41.57	Mascot (A5)			Mascot (A5)	cot (A5)	ot (A5)	ot (A5)	-0.82
	FALSE	High	[R].TAAENDFVTLKK.[D]			FALSE	1	1	22	P35908	P35908 [276-287]	1	1336.71	0	89.3	124.5	158.9	127.2	115.7	92.3	86	106.1			High	High	High	High	High	High	Peak Found	High	Not Found	High	High	0	0	4.328e-05	1.022e-05	4.27	64		R.TAAENDFVTLKK.D	[276-287]					86
		Checked	Confidence	Identifying Node	PSM Ambiguity	Annotated Sequence	Modifications	# Protein Groups	# Proteins	Master Protein Accessions	Protein Accessions	# Missed Cleavages	Charge	DeltaScore	DeltaCn	Rank	Search Engine Rank	m/z [Da]	MH+ [Da]	Theo. MH+ [Da]	DeltaM [ppm]	Deltam/z [Da]	Activation Type	MS Order	Isolation Interference [%]	Ion Inject Time [ms]	RT [min]	First Scan	Spectrum File	File ID	Quan Info	XCorr	Ions Score	Contaminant	Identity Strict	Identity Relaxed	Expectation Value	Percolator q-Value	Percolator PEP	Precursor Abundance	Apex RT [min]	Identifying Node			Identifying No	ntifying	tifying	tifying	DeltaM [ppm]
		FALSE	High	Sequest HT (A2)	Selected	[R].TAAENDFVTLKK.[D]		1	1	P35908	P35908	1	3	0.6432	0	1	1	446.242	1336.71	1336.71	-0.23	-0.0001	HCD (High Energy Collision Dissociation)	MS2	15.4812	10.582	31.6124	17300	01082019_Fusion_MASSFIITB_307198_S2.raw	F2		3.98		FALSE				0	6.358e-06	528187936	31.73	Sequest HT (A2)			Sequest HT (A2	uest HT	est HT	est HT	-0.23
		FALSE	High	Sequest HT (A2)	Selected	[R].TAAENDFVTLKK.[D]		1	1	P35908	P35908	1	3	0.6765	0	1	1	446.242	1336.71	1336.71	-0.52	-0.00023	HCD (High Energy Collision Dissociation)	MS2	17.4399	9.91	31.7894	17466	01082019_Fusion_MASSFIITB_307198_S1.raw	F1		4.05		FALSE				0	8.138e-06	150885536	31.86	Sequest HT (A2)			Sequest HT (A2	uest HT	est HT	est HT	-0.52
		FALSE	High	Sequest HT (A2)	Selected	[R].TAAENDFVTLKK.[D]		1	1	P35908	P35908	1	3	0.6768	0	1	1	446.241	1336.71	1336.71	-0.72	-0.00032	HCD (High Energy Collision Dissociation)	MS2	17.9899	18.151	31.6246	17495	01082019_Fusion_MASSFIITB_307198_S5.raw	F5		4.27		FALSE				0	1.022e-05	381104800	31.73	Sequest HT (A2)			Sequest HT (A2	uest HT	est HT	est HT	-0.72
		FALSE	High	Mascot (A5)	Unambiguous	[R].TAAENDFVTLKK.[D]		1	1	P35908	P35908	1	2	1	0	1	1	668.859	1336.71	1336.71	0.53	0.00035	HCD (High Energy Collision Dissociation)	MS2	17.471	30	31.7439	17797	01082019_Fusion_MASSFIITB_307198_S4.raw	F4			79	FALSE	53	35	2.35112e-07	0	1.069e-05	278122592	31.9	Mascot (A5)			Mascot (A5)	cot (A5)	ot (A5)	ot (A5)	0.53
		FALSE	High	Sequest HT (A2)	Selected	[R].TAAENDFVTLKK.[D]		1	1	P35908	P35908	1	3	0.6819	0	1	1	446.241	1336.71	1336.71	-0.63	-0.00028	HCD (High Energy Collision Dissociation)	MS2	19.5269	9.444	31.7348	18047	01082019_Fusion_MASSFIITB_307198_S3.raw	F3		3.71		FALSE				0	2.46e-05	663436032	31.86	Sequest HT (A2)			Sequest HT (A2	uest HT	est HT	est HT	-0.63
		FALSE	High	Sequest HT (A2)	Unambiguous	[R].TAAENDFVTLKK.[D]		1	1	P35908	P35908	1	3	0.6537	0	1	1	446.241	1336.71	1336.71	-1.29	-0.00058	HCD (High Energy Collision Dissociation)	MS2	21.0016	11.617	31.7722	16824	01082019_Fusion_MASSFIITB_307198_S8.raw	F8		3.87		FALSE				0	2.554e-05	87879880	31.82	Sequest HT (A2)			Sequest HT (A2	uest HT	est HT	est HT	-1.29
		FALSE	High	Mascot (A5)	Unambiguous	[R].TAAENDFVTLKK.[D]		1	1	P35908	P35908	1	3	1	0	1	1	446.241	1336.71	1336.71	-1.29	-0.00058	HCD (High Energy Collision Dissociation)	MS2	21.0016	11.617	31.7722	16824	01082019_Fusion_MASSFIITB_307198_S8.raw	F8			64	FALSE	53	36	1.04852e-05	0	4.328e-05	87879880	31.82	Mascot (A5)			Mascot (A5)	cot (A5)	ot (A5)	ot (A5)	-1.29
		FALSE	High	Sequest HT (A2)	Unambiguous	[R].TAAENDFVTLKK.[D]		1	1	P35908	P35908	1	2	0.6557	0	1	1	668.859	1336.71	1336.71	0.1	6e-05	HCD (High Energy Collision Dissociation)	MS2	24.8851	24.309	31.7054	15952	01082019_Fusion_MASSFIITB_307198_S6.raw	F6		2.44		FALSE				0	5.284e-05	33693152	31.79	Sequest HT (A2)			Sequest HT (A2	uest HT	est HT	est HT	0.1
		FALSE	High	Sequest HT (A2)	Selected	[R].TAAENDFVTLKK.[D]		1	1	P35908	P35908	1	3	0.6648	0	1	1	446.242	1336.71	1336.71	-0.31	-0.00014	HCD (High Energy Collision Dissociation)	MS2	16.2501	8.014	31.7602	17811	01082019_Fusion_MASSFIITB_307198_S4.raw	F4		3.58		FALSE				0	5.486e-05	707527360	31.9	Sequest HT (A2)			Sequest HT (A2	uest HT	est HT	est HT	-0.31
		FALSE	High	Sequest HT (A2)	Unambiguous	[R].TAAENDFVTLKK.[D]		1	1	P35908	P35908	1	3	0.6132	0	1	1	446.241	1336.71	1336.71	-0.92	-0.00041	HCD (High Energy Collision Dissociation)	MS2	19.0763	9.584	31.7114	15956	01082019_Fusion_MASSFIITB_307198_S6.raw	F6		3.49		FALSE				0	6.481e-05	113825440	31.78	Sequest HT (A2)			Sequest HT (A2	uest HT	est HT	est HT	-0.92
		FALSE	High	Mascot (A5)	Unambiguous	[R].TAAENDFVTLKK.[D]		1	1	P35908	P35908	1	2	1	0	1	1	668.859	1336.71	1336.71	0.1	6e-05	HCD (High Energy Collision Dissociation)	MS2	24.8851	24.309	31.7054	15952	01082019_Fusion_MASSFIITB_307198_S6.raw	F6			74	FALSE	53	35	8.98308e-07	0	7.058e-05	33693152	31.79	Mascot (A5)			Mascot (A5)	cot (A5)	ot (A5)	ot (A5)	0.1
		FALSE	High	Sequest HT (A2)	Unambiguous	[R].TAAENDFVTLKK.[D]		1	1	P35908	P35908	1	2	0.6987	0	1	1	668.859	1336.71	1336.71	0.46	0.00031	HCD (High Energy Collision Dissociation)	MS2	22.174	28.679	31.5971	17286	01082019_Fusion_MASSFIITB_307198_S2.raw	F2		2.39		FALSE				0	7.327e-05	167097536	31.73	Sequest HT (A2)			Sequest HT (A2	uest HT	est HT	est HT	0.46
		FALSE	High	Sequest HT (A2)	Unambiguous	[R].TAAENDFVTLKK.[D]		1	1	P35908	P35908	1	2	0.7283	0	1	1	668.859	1336.71	1336.71	-0.35	-0.00023	HCD (High Energy Collision Dissociation)	MS2	18.3414	23.729	31.7745	16825	01082019_Fusion_MASSFIITB_307198_S8.raw	F8		2.54		FALSE				0	8.186e-05	21002020	31.82	Sequest HT (A2)			Sequest HT (A2	uest HT	est HT	est HT	-0.35
		FALSE	High	Sequest HT (A2)	Unambiguous	[R].TAAENDFVTLKK.[D]		1	1	P35908	P35908	1	2	0.687	0	1	1	668.859	1336.71	1336.71	0.53	0.00035	HCD (High Energy Collision Dissociation)	MS2	17.471	30	31.7439	17797	01082019_Fusion_MASSFIITB_307198_S4.raw	F4		2.3		FALSE				0	9.113e-05	278122592	31.9	Sequest HT (A2)			Sequest HT (A2	uest HT	est HT	est HT	0.53
		FALSE	High	Sequest HT (A2)	Selected	[R].TAAENDFVTLKK.[D]		1	1	P35908	P35908	1	2	0.609	0	1	1	668.859	1336.71	1336.71	0.73	0.00049	HCD (High Energy Collision Dissociation)	MS2	43.2575	30	31.6992	18015	01082019_Fusion_MASSFIITB_307198_S3.raw	F3		2.66		FALSE				0	0.0001049	331340416	31.86	Sequest HT (A2)			Sequest HT (A2	uest HT	est HT	est HT	0.73
		FALSE	High	Mascot (A5)	Unambiguous	[R].TAAENDFVTLKK.[D]		1	1	P35908	P35908	1	2	1	0	1	1	668.859	1336.71	1336.71	-0.35	-0.00023	HCD (High Energy Collision Dissociation)	MS2	18.3414	23.729	31.7745	16825	01082019_Fusion_MASSFIITB_307198_S8.raw	F8			56	FALSE	53	35	4.97238e-05	0	0.0001058	21002020	31.82	Mascot (A5)			Mascot (A5)	cot (A5)	ot (A5)	ot (A5)	-0.35
		FALSE	High	Sequest HT (A2)	Unambiguous	[R].TAAENDFVTLKK.[D]		1	1	P35908	P35908	1	2	0.6167	0	1	1	668.859	1336.71	1336.71	0.68	0.00045	HCD (High Energy Collision Dissociation)	MS2	23.8893	30	31.7653	17444	01082019_Fusion_MASSFIITB_307198_S1.raw	F1		2.27		FALSE				0	0.0001309	37282904	31.86	Sequest HT (A2)			Sequest HT (A2	uest HT	est HT	est HT	0.68
		FALSE	High	Sequest HT (A2)	Unambiguous	[R].TAAENDFVTLKK.[D]		1	1	P35908	P35908	1	2	0.6897	0	1	1	668.859	1336.71	1336.71	0.59	0.0004	HCD (High Energy Collision Dissociation)	MS2	22.6788	23.5	31.6269	17496	01082019_Fusion_MASSFIITB_307198_S5.raw	F5		2.61		FALSE				0	0.0001329	162878576	31.73	Sequest HT (A2)			Sequest HT (A2	uest HT	est HT	est HT	0.59
		FALSE	High	Mascot (A5)	Unambiguous	[R].TAAENDFVTLKK.[D]		1	1	P35908	P35908	1	2	1	0	1	1	668.859	1336.71	1336.71	0.46	0.00031	HCD (High Energy Collision Dissociation)	MS2	22.174	28.679	31.5971	17286	01082019_Fusion_MASSFIITB_307198_S2.raw	F2			72	FALSE	53	35	1.35917e-06	0	0.000144	167097536	31.73	Mascot (A5)			Mascot (A5)	cot (A5)	ot (A5)	ot (A5)	0.46
		FALSE	High	Mascot (A5)	Unambiguous	[R].TAAENDFVTLKK.[D]		1	1	P35908	P35908	1	2	1	0	1	1	668.859	1336.71	1336.71	0.59	0.0004	HCD (High Energy Collision Dissociation)	MS2	22.6788	23.5	31.6269	17496	01082019_Fusion_MASSFIITB_307198_S5.raw	F5			81	FALSE	53	35	1.668e-07	0	0.0001638	162878576	31.73	Mascot (A5)			Mascot (A5)	cot (A5)	ot (A5)	ot (A5)	0.59
		FALSE	High	Mascot (A5)	Unambiguous	[R].TAAENDFVTLKK.[D]		1	1	P35908	P35908	1	3	1	0	1	1	446.241	1336.71	1336.71	-0.92	-0.00041	HCD (High Energy Collision Dissociation)	MS2	19.0763	9.584	31.7114	15956	01082019_Fusion_MASSFIITB_307198_S6.raw	F6			64	FALSE	53	36	1.04852e-05	0	0.0002264	113825440	31.78	Mascot (A5)			Mascot (A5)	cot (A5)	ot (A5)	ot (A5)	-0.92
		FALSE	High	Mascot (A5)	Unambiguous	[R].TAAENDFVTLKK.[D]		1	1	P35908	P35908	1	2	1	0	1	1	668.859	1336.71	1336.71	0.68	0.00045	HCD (High Energy Collision Dissociation)	MS2	23.8893	30	31.7653	17444	01082019_Fusion_MASSFIITB_307198_S1.raw	F1			57	FALSE	53	35	3.98287e-05	0	0.0006445	37282904	31.86	Mascot (A5)			Mascot (A5)	cot (A5)	ot (A5)	ot (A5)	0.68
	FALSE	High	[K].TLNNKFASFIDKVR.[F]			TRUE	5	15	4	P35908; P04259; P02538; P05787; P13647	P35908 [184-197]; P04259 [169-182]; P02538 [169-182]; P05787 [97-110]; P13647 [174-187]	2	1652.91	0	128.2	382.5		355.9	33.4					Shared	Peak Found	High	Not Found	High	Peak Found	Not Found	Not Found	Not Found	Not Found	High	High	0	0	0.00246	9.587e-08	3.51	42		K.TLNNKFASFIDKVR.F	[184-197]
		Checked	Confidence	Identifying Node	PSM Ambiguity	Annotated Sequence	Modifications	# Protein Groups	# Proteins	Master Protein Accessions	Protein Accessions	# Missed Cleavages	Charge	DeltaScore	DeltaCn	Rank	Search Engine Rank	m/z [Da]	MH+ [Da]	Theo. MH+ [Da]	DeltaM [ppm]	Deltam/z [Da]	Activation Type	MS Order	Isolation Interference [%]	Ion Inject Time [ms]	RT [min]	First Scan	Spectrum File	File ID	Quan Info	XCorr	Ions Score	Contaminant	Identity Strict	Identity Relaxed	Expectation Value	Percolator q-Value	Percolator PEP	Precursor Abundance	Apex RT [min]	Identifying Node			Identifying No	ntifying	tifying	tifying	DeltaM [ppm]
		FALSE	High	Sequest HT (A2)	Unambiguous	[K].TLNNKFASFIDKVR.[F]		5	15	P35908; P04259; P02538; P05787; P13647	Q5XKE5; P08729; F8W0C6; P35908; P04259; P02538; Q01546; O95678; P48668; Q9NSB2; P12035; F8VUG2; F8W1U3; P05787; P13647	2	4	0.6952	0	1	1	413.983	1652.91	1652.91	-1.41	-0.00058	HCD (High Energy Collision Dissociation)	MS2	20.3532	30	45.2148	29250	01082019_Fusion_MASSFIITB_307198_S4.raw	F4		3.51		TRUE				0	9.587e-08	75961696	45.36	Sequest HT (A2)			Sequest HT (A2	uest HT	est HT	est HT	-1.41
		FALSE	High	Sequest HT (A2)	Unambiguous	[K].TLNNKFASFIDKVR.[F]		5	15	P35908; P04259; P02538; P05787; P13647	Q5XKE5; P08729; F8W0C6; P35908; P04259; P02538; Q01546; O95678; P48668; Q9NSB2; P12035; F8VUG2; F8W1U3; P05787; P13647	2	4	0.6366	0	1	1	413.983	1652.91	1652.91	-0.78	-0.00032	HCD (High Energy Collision Dissociation)	MS2	31.6199	18.014	45.1522	28917	01082019_Fusion_MASSFIITB_307198_S2.raw	F2		3.33		TRUE				0	8.233e-07	58873560	45.29	Sequest HT (A2)			Sequest HT (A2	uest HT	est HT	est HT	-0.78
		FALSE	High	Mascot (A5)	Unambiguous	[K].TLNNKFASFIDKVR.[F]		5	15	P35908; P04259; P02538; P05787; P13647	Q5XKE5; P08729; F8W0C6; P35908; P04259; P02538; Q01546; O95678; P48668; Q9NSB2; P12035; F8VUG2; F8W1U3; P05787; P13647	2	4	1	0	1	1	413.983	1652.91	1652.91	-1.41	-0.00058	HCD (High Energy Collision Dissociation)	MS2	20.3532	30	45.2148	29250	01082019_Fusion_MASSFIITB_307198_S4.raw	F4			58	TRUE	51	33	2.5367e-05	0	2.074e-06	75961696	45.36	Mascot (A5)			Mascot (A5)	cot (A5)	ot (A5)	ot (A5)	-1.41
		FALSE	High	Mascot (A5)	Unambiguous	[K].TLNNKFASFIDKVR.[F]		5	15	P35908; P04259; P02538; P05787; P13647	Q5XKE5; P08729; F8W0C6; P35908; P04259; P02538; Q01546; O95678; P48668; Q9NSB2; P12035; F8VUG2; F8W1U3; P05787; P13647	2	4	0.9615	0	1	1	413.983	1652.91	1652.91	-0.78	-0.00032	HCD (High Energy Collision Dissociation)	MS2	31.6199	18.014	45.1522	28917	01082019_Fusion_MASSFIITB_307198_S2.raw	F2			52	TRUE	51	34	9.48691e-05	0	4.219e-05	58873560	45.29	Mascot (A5)			Mascot (A5)	cot (A5)	ot (A5)	ot (A5)	-0.78
	FALSE	High	[R].TSQNSELNNMQDLVEDYKK.[K]			FALSE	1	1	4	P35908	P35908 [248-266]	1	2256.04	0	90.3	251.7	276.6	37.2	244.2						Peak Found	High	High	High	Peak Found	Not Found	Not Found	Not Found	Not Found	High	High	0	0	0.0001132	5.015e-07	3.78	40		R.TSQNSELNNMQDLVEDYKK.K	[248-266]
		Checked	Confidence	Identifying Node	PSM Ambiguity	Annotated Sequence	Modifications	# Protein Groups	# Proteins	Master Protein Accessions	Protein Accessions	# Missed Cleavages	Charge	DeltaScore	DeltaCn	Rank	Search Engine Rank	m/z [Da]	MH+ [Da]	Theo. MH+ [Da]	DeltaM [ppm]	Deltam/z [Da]	Activation Type	MS Order	Isolation Interference [%]	Ion Inject Time [ms]	RT [min]	First Scan	Spectrum File	File ID	Quan Info	XCorr	Ions Score	Contaminant	Identity Strict	Identity Relaxed	Expectation Value	Percolator q-Value	Percolator PEP	Precursor Abundance	Apex RT [min]	Identifying Node			Identifying No	ntifying	tifying	tifying	DeltaM [ppm]
		FALSE	High	Sequest HT (A2)	Selected	[R].TSQNSELNNMQDLVEDYKK.[K]		1	1	P35908	P35908	1	3	0.7566	0	1	1	752.688	2256.05	2256.04	1.57	0.00118	HCD (High Energy Collision Dissociation)	MS2	0	23.598	49.6478	32995	01082019_Fusion_MASSFIITB_307198_S2.raw	F2		3.78		FALSE				0	5.015e-07	90878984	49.89	Sequest HT (A2)			Sequest HT (A2	uest HT	est HT	est HT	1.57
		FALSE	High	Sequest HT (A2)	Unambiguous	[R].TSQNSELNNMQDLVEDYKK.[K]		1	1	P35908	P35908	1	3	0.7766	0	1	1	752.687	2256.05	2256.04	0.98	0.00074	HCD (High Energy Collision Dissociation)	MS2	0	30	49.7697	33268	01082019_Fusion_MASSFIITB_307198_S4.raw	F4		3.76		FALSE				0	2.389e-06	18628910	49.83	Sequest HT (A2)			Sequest HT (A2	uest HT	est HT	est HT	0.98
		FALSE	High	Sequest HT (A2)	Selected	[R].TSQNSELNNMQDLVEDYKK.[K]		1	1	P35908	P35908	1	3	0.7762	0	1	1	752.687	2256.05	2256.04	0.59	0.00045	HCD (High Energy Collision Dissociation)	MS2	100	30	49.6308	33448	01082019_Fusion_MASSFIITB_307198_S3.raw	F3		3.53		FALSE				0	8.116e-06	111984688	49.81	Sequest HT (A2)			Sequest HT (A2	uest HT	est HT	est HT	0.59
		FALSE	High	Mascot (A5)	Unambiguous	[R].TSQNSELNNMQDLVEDYKK.[K]		1	1	P35908	P35908	1	3	1	0	1	1	752.687	2256.05	2256.04	0.98	0.00074	HCD (High Energy Collision Dissociation)	MS2	0	30	49.7697	33268	01082019_Fusion_MASSFIITB_307198_S4.raw	F4			52	FALSE	51	33	8.53724e-05	0	3.05e-05	18628910	49.83	Mascot (A5)			Mascot (A5)	cot (A5)	ot (A5)	ot (A5)	0.98
	FALSE	High	[R].TSQNSELNNMQDLVEDYKK.[K]	1xOxidation [M10]		FALSE	1	1	4	P35908	P35908 [248-266]	1	2272.04	0	146.9	73.4	150.4	112.7	149.3	79.9	69.4	118.2			Peak Found	High	High	High	Peak Found	Peak Found	Peak Found	Peak Found	Not Found	High	High	0	0	0.0002703	7.943e-06	3.26	51	1xOxidation [M10]	R.TSQNSELNNMQDLVEDYKK.K	[248-266]	1xOxidation [M	xidation	idation	idation	69.4
		Checked	Confidence	Identifying Node	PSM Ambiguity	Annotated Sequence	Modifications	# Protein Groups	# Proteins	Master Protein Accessions	Protein Accessions	# Missed Cleavages	Charge	DeltaScore	DeltaCn	Rank	Search Engine Rank	m/z [Da]	MH+ [Da]	Theo. MH+ [Da]	DeltaM [ppm]	Deltam/z [Da]	Activation Type	MS Order	Isolation Interference [%]	Ion Inject Time [ms]	RT [min]	First Scan	Spectrum File	File ID	Quan Info	XCorr	Ions Score	Contaminant	Identity Strict	Identity Relaxed	Expectation Value	Percolator q-Value	Percolator PEP	Precursor Abundance	Apex RT [min]	Identifying Node			Identifying No	ntifying	tifying	tifying	DeltaM [ppm]
		FALSE	High	Sequest HT (A2)	Selected	[R].TSQNSELNNmQDLVEDYKK.[K]	M10(Oxidation)	1	1	P35908	P35908	1	3	0.7209	0	1	1	758.018	2272.04	2272.04	0.25	0.00019	HCD (High Energy Collision Dissociation)	MS2	34.2705	30	35.8017	21204	01082019_Fusion_MASSFIITB_307198_S4.raw	F4		3.26		FALSE				0	7.943e-06	43458848	36.02	Sequest HT (A2)			Sequest HT (A2	uest HT	est HT	est HT	0.25
		FALSE	High	Sequest HT (A2)	Unambiguous	[R].TSQNSELNNmQDLVEDYKK.[K]	M10(Oxidation)	1	1	P35908	P35908	1	3	0.7914	0	1	1	758.018	2272.04	2272.04	-0.19	-0.00015	HCD (High Energy Collision Dissociation)	MS2	27.0037	27.304	35.8402	21457	01082019_Fusion_MASSFIITB_307198_S3.raw	F3		3.02		FALSE				0	1.562e-05	46896079	36.09	Sequest HT (A2)			Sequest HT (A2	uest HT	est HT	est HT	-0.19
		FALSE	High	Mascot (A5)	Unambiguous	[R].TSQNSELNNmQDLVEDYKK.[K]	M10(Oxidation)	1	1	P35908	P35908	1	3	1	0	1	1	758.018	2272.04	2272.04	-0.19	-0.00015	HCD (High Energy Collision Dissociation)	MS2	27.0037	27.304	35.8402	21457	01082019_Fusion_MASSFIITB_307198_S3.raw	F3			51	FALSE	49	32	7.92085e-05	0	0.0002703	46896079	36.09	Mascot (A5)			Mascot (A5)	cot (A5)	ot (A5)	ot (A5)	-0.19
		FALSE	High	Sequest HT (A2)	Selected	[R].TSQNSELNNmQDLVEDYKK.[K]	M10(Oxidation)	1	1	P35908	P35908	1	3	0.6335	0	1	1	758.018	2272.04	2272.04	0.49	0.00037	HCD (High Energy Collision Dissociation)	MS2	25.8865	28.86	35.8846	20826	01082019_Fusion_MASSFIITB_307198_S2.raw	F2		2.81		FALSE				0	0.0003171	20398670	36.09	Sequest HT (A2)			Sequest HT (A2	uest HT	est HT	est HT	0.49
	FALSE	High	[R].DYQELMNVK.[L]			FALSE	1	5	1	P35908	P35908 [462-470]	0	1139.54	0	124.6	201.7	242.1	36.8	264	30.8					Peak Found	High	Peak Found	Peak Found	Peak Found	Peak Found	Not Found	Not Found	Not Found	High	High	0	0.001395	0.01552	0.03112	2.27	35		R.DYQELMNVK.L	[462-470]
		Checked	Confidence	Identifying Node	PSM Ambiguity	Annotated Sequence	Modifications	# Protein Groups	# Proteins	Master Protein Accessions	Protein Accessions	# Missed Cleavages	Charge	DeltaScore	DeltaCn	Rank	Search Engine Rank	m/z [Da]	MH+ [Da]	Theo. MH+ [Da]	DeltaM [ppm]	Deltam/z [Da]	Activation Type	MS Order	Isolation Interference [%]	Ion Inject Time [ms]	RT [min]	First Scan	Spectrum File	File ID	Quan Info	XCorr	Ions Score	Contaminant	Identity Strict	Identity Relaxed	Expectation Value	Percolator q-Value	Percolator PEP	Precursor Abundance	Apex RT [min]	Identifying Node			Identifying No	ntifying	tifying	tifying	DeltaM [ppm]
		FALSE	High	Sequest HT (A2)	Selected	[R].DYQELMNVK.[L]		1	5	P35908	Q5XKE5; P35908; Q01546; P12035; H0YID6	0	2	0.63	0	1	1	570.274	1139.54	1139.54	0.09	5e-05	HCD (High Energy Collision Dissociation)	MS2	18.4218	23.5	46.2029	29883	01082019_Fusion_MASSFIITB_307198_S2.raw	F2		2.27		FALSE				0.001395	0.03112	49246144	46.26	Sequest HT (A2)			Sequest HT (A2	uest HT	est HT	est HT	0.09
	FALSE	High	[K].DVDNAYMIK.[V]			FALSE	1	1	2	P35908	P35908 [288-296]	0	1068.5	0	117.2	210.4	292.6	44.5	235.3						High	Peak Found	Peak Found	Peak Found	High	Not Found	Not Found	Not Found	Not Found	High	High	0.000249	0	0.02747	0.008107	2.28	33		K.DVDNAYMIK.V	[288-296]
		Checked	Confidence	Identifying Node	PSM Ambiguity	Annotated Sequence	Modifications	# Protein Groups	# Proteins	Master Protein Accessions	Protein Accessions	# Missed Cleavages	Charge	DeltaScore	DeltaCn	Rank	Search Engine Rank	m/z [Da]	MH+ [Da]	Theo. MH+ [Da]	DeltaM [ppm]	Deltam/z [Da]	Activation Type	MS Order	Isolation Interference [%]	Ion Inject Time [ms]	RT [min]	First Scan	Spectrum File	File ID	Quan Info	XCorr	Ions Score	Contaminant	Identity Strict	Identity Relaxed	Expectation Value	Percolator q-Value	Percolator PEP	Precursor Abundance	Apex RT [min]	Identifying Node			Identifying No	ntifying	tifying	tifying	DeltaM [ppm]
		FALSE	High	Sequest HT (A2)	Selected	[K].DVDNAYMIK.[V]		1	1	P35908	P35908	0	2	0.7281	0	1	1	534.755	1068.5	1068.5	-0.09	-5e-05	HCD (High Energy Collision Dissociation)	MS2	24.3147	27.454	40.767	25112	01082019_Fusion_MASSFIITB_307198_S1.raw	F1		2.28		FALSE				0	0.008107	8493699	40.78	Sequest HT (A2)			Sequest HT (A2	uest HT	est HT	est HT	-0.09
		FALSE	High	Mascot (A5)	Selected	[K].DVDNAYMIK.[V]		1	1	P35908	P35908	0	2	1	0	1	1	534.755	1068.5	1068.5	-1	-0.00053	HCD (High Energy Collision Dissociation)	MS2	0	23.029	40.7217	25000	01082019_Fusion_MASSFIITB_307198_S5.raw	F5			54	FALSE	51	33	5.04209e-05	0.001748	0.03849	38030736	40.76	Mascot (A5)			Mascot (A5)	cot (A5)	ot (A5)	ot (A5)	-1
	FALSE	High	[R].FLEQQNQVLQTK.[W]			FALSE	3	3	41	Q7Z794; P35908; P04264	Q7Z794 [184-195]; P35908 [198-209]; P04264 [200-211]	0	1475.79	0	104.9	78.2	115.4	130	100	105.4	124.3	118.5	23.3	Shared	High	High	High	High	High	High	High	High	Peak Found	High	High	0	0	0.00573	0.0002739	3.25	40		R.FLEQQNQVLQTK.W	[198-209]					124.3
		Checked	Confidence	Identifying Node	PSM Ambiguity	Annotated Sequence	Modifications	# Protein Groups	# Proteins	Master Protein Accessions	Protein Accessions	# Missed Cleavages	Charge	DeltaScore	DeltaCn	Rank	Search Engine Rank	m/z [Da]	MH+ [Da]	Theo. MH+ [Da]	DeltaM [ppm]	Deltam/z [Da]	Activation Type	MS Order	Isolation Interference [%]	Ion Inject Time [ms]	RT [min]	First Scan	Spectrum File	File ID	Quan Info	XCorr	Ions Score	Contaminant	Identity Strict	Identity Relaxed	Expectation Value	Percolator q-Value	Percolator PEP	Precursor Abundance	Apex RT [min]	Identifying Node			Identifying No	ntifying	tifying	tifying	DeltaM [ppm]
		FALSE	High	Mascot (A5)	Selected	[R].FLEQQNQVLQTK.[W]		3	3	Q7Z794; P35908; P04264	Q7Z794; P35908; P04264	0	2	0.7717	0	1	1	738.396	1475.79	1475.79	-0.03	-2e-05	HCD (High Energy Collision Dissociation)	MS2	0	30	90.3128	65639	01082019_Fusion_MASSFIITB_307198_S3.raw	F3			92	FALSE	55	37	2.15549e-08	0	3.535e-06	10416289	90.39	Mascot (A5)			Mascot (A5)	cot (A5)	ot (A5)	ot (A5)	-0.03
		FALSE	High	Sequest HT (A2)	Unambiguous	[R].FLEQQNQVLQTK.[W]		3	3	Q7Z794; P35908; P04264	Q7Z794; P35908; P04264	0	2	0.649	0	1	1	738.396	1475.78	1475.79	-0.21	-0.00015	HCD (High Energy Collision Dissociation)	MS2	15.0317	30	39.8175	22421	01082019_Fusion_MASSFIITB_307198_S6.raw	F6		2.45		FALSE				0	3.56e-06	767441152	39.32	Sequest HT (A2)			Sequest HT (A2	uest HT	est HT	est HT	-0.21
		FALSE	High	Sequest HT (A2)	Unambiguous	[R].FLEQQNQVLQTK.[W]		3	3	Q7Z794; P35908; P04264	Q7Z794; P35908; P04264	0	2	0.623	0	1	1	738.397	1475.79	1475.79	1.08	0.0008	HCD (High Energy Collision Dissociation)	MS2	8.8794	23.5	39.1667	24265	01082019_Fusion_MASSFIITB_307198_S3.raw	F3		3.13		FALSE				0	3.986e-06	3268648192	39.33	Sequest HT (A2)			Sequest HT (A2	uest HT	est HT	est HT	1.08
		FALSE	High	Mascot (A5)	Unambiguous	[R].FLEQQNQVLQTK.[W]		3	3	Q7Z794; P35908; P04264	Q7Z794; P35908; P04264	0	2	0.7746	0	1	1	738.395	1475.78	1475.79	-1.99	-0.00147	HCD (High Energy Collision Dissociation)	MS2	0	30	40.5245	24847	01082019_Fusion_MASSFIITB_307198_S5.raw	F5			71	FALSE	54	37	2.23479e-06	0	4.696e-06	2144869888	39.32	Mascot (A5)			Mascot (A5)	cot (A5)	ot (A5)	ot (A5)	-1.99
		FALSE	High	Mascot (A5)	Unambiguous	[R].FLEQQNQVLQTK.[W]		3	3	Q7Z794; P35908; P04264	Q7Z794; P35908; P04264	0	2	0.8553	0	1	1	738.395	1475.78	1475.79	-1.22	-0.0009	HCD (High Energy Collision Dissociation)	MS2	18.2072	24.096	41.9463	26640	01082019_Fusion_MASSFIITB_307198_S3.raw	F3			76	FALSE	54	37	8.60992e-07	0	4.779e-06			Mascot (A5)			Mascot (A5)	cot (A5)	ot (A5)	ot (A5)	-1.22
		FALSE	High	Sequest HT (A2)	Unambiguous	[R].FLEQQNQVLQTK.[W]		3	3	Q7Z794; P35908; P04264	Q7Z794; P35908; P04264	0	2	0.6777	0	1	1	738.396	1475.79	1475.79	0.19	0.00014	HCD (High Energy Collision Dissociation)	MS2	1.65039	9.64	39.8441	24848	01082019_Fusion_MASSFIITB_307198_S3.raw	F3		2.73		FALSE				0	5.199e-06	3268648192	39.33	Sequest HT (A2)			Sequest HT (A2	uest HT	est HT	est HT	0.19
		FALSE	High	Sequest HT (A2)	Unambiguous	[R].FLEQQNQVLQTK.[W]		3	3	Q7Z794; P35908; P04264	Q7Z794; P35908; P04264	0	2	0.6747	0	1	1	738.397	1475.79	1475.79	1.39	0.00102	HCD (High Energy Collision Dissociation)	MS2	25.6538	30	39.1461	23683	01082019_Fusion_MASSFIITB_307198_S5.raw	F5		2.92		FALSE				0	6.146e-06	2144869888	39.32	Sequest HT (A2)			Sequest HT (A2	uest HT	est HT	est HT	1.39
		FALSE	High	Sequest HT (A2)	Unambiguous	[R].FLEQQNQVLQTK.[W]		3	3	Q7Z794; P35908; P04264	Q7Z794; P35908; P04264	0	2	0.585	0	1	1	738.395	1475.78	1475.79	-1.09	-0.00081	HCD (High Energy Collision Dissociation)	MS2	4.87148	30	39.8403	24299	01082019_Fusion_MASSFIITB_307198_S1.raw	F1		2.53		FALSE				0	7.566e-06	1006419200	39.34	Sequest HT (A2)			Sequest HT (A2	uest HT	est HT	est HT	-1.09
		FALSE	High	Mascot (A5)	Unambiguous	[R].FLEQQNQVLQTK.[W]		3	3	Q7Z794; P35908; P04264	Q7Z794; P35908; P04264	0	2	0.8272	0	1	1	738.396	1475.78	1475.79	-0.42	-0.00031	HCD (High Energy Collision Dissociation)	MS2	8.15326	21.69	39.8218	24257	01082019_Fusion_MASSFIITB_307198_S5.raw	F5			81	FALSE	55	37	2.55305e-07	0	7.753e-06	2144869888	39.32	Mascot (A5)			Mascot (A5)	cot (A5)	ot (A5)	ot (A5)	-0.42
		FALSE	High	Mascot (A5)	Unambiguous	[R].FLEQQNQVLQTK.[W]		3	3	Q7Z794; P35908; P04264	Q7Z794; P35908; P04264	0	2	0.7746	0	1	1	738.397	1475.79	1475.79	1.48	0.00109	HCD (High Energy Collision Dissociation)	MS2	19.1098	28.107	48.6691	32306	01082019_Fusion_MASSFIITB_307198_S4.raw	F4			71	FALSE	54	36	2.22069e-06	0	7.763e-06	13934866	48.74	Mascot (A5)			Mascot (A5)	cot (A5)	ot (A5)	ot (A5)	1.48
		FALSE	High	Sequest HT (A2)	Unambiguous	[R].FLEQQNQVLQTK.[W]		3	3	Q7Z794; P35908; P04264	Q7Z794; P35908; P04264	0	2	0.6417	0	1	1	738.398	1475.79	1475.79	2.02	0.00149	HCD (High Energy Collision Dissociation)	MS2	13.1405	30	39.1258	24014	01082019_Fusion_MASSFIITB_307198_S4.raw	F4		2.54		FALSE				0	9.241e-06	4519849984	39.37	Sequest HT (A2)			Sequest HT (A2	uest HT	est HT	est HT	2.02
		FALSE	High	Sequest HT (A2)	Unambiguous	[R].FLEQQNQVLQTK.[W]		3	3	Q7Z794; P35908; P04264	Q7Z794; P35908; P04264	0	2	0.6217	0	1	1	738.395	1475.78	1475.79	-1.99	-0.00147	HCD (High Energy Collision Dissociation)	MS2	0	30	40.5245	24847	01082019_Fusion_MASSFIITB_307198_S5.raw	F5		2.3		FALSE				0	9.901e-06	2144869888	39.32	Sequest HT (A2)			Sequest HT (A2	uest HT	est HT	est HT	-1.99
		FALSE	High	Mascot (A5)	Unambiguous	[R].FLEQQNQVLQTK.[W]		3	3	Q7Z794; P35908; P04264	Q7Z794; P35908; P04264	0	2	0.8684	0	1	1	738.395	1475.78	1475.79	-1.09	-0.00081	HCD (High Energy Collision Dissociation)	MS2	4.87148	30	39.8403	24299	01082019_Fusion_MASSFIITB_307198_S1.raw	F1			76	FALSE	54	37	7.27779e-07	0	1.005e-05	1006419200	39.34	Mascot (A5)			Mascot (A5)	cot (A5)	ot (A5)	ot (A5)	-1.09
		FALSE	High	Sequest HT (A2)	Unambiguous	[R].FLEQQNQVLQTK.[W]		3	3	Q7Z794; P35908; P04264	Q7Z794; P35908; P04264	0	2	0.5413	0	1	1	738.395	1475.78	1475.79	-1.22	-0.0009	HCD (High Energy Collision Dissociation)	MS2	18.2072	24.096	41.9463	26640	01082019_Fusion_MASSFIITB_307198_S3.raw	F3		2.42		FALSE				0	1.016e-05			Sequest HT (A2)			Sequest HT (A2	uest HT	est HT	est HT	-1.22
		FALSE	High	Mascot (A5)	Unambiguous	[R].FLEQQNQVLQTK.[W]		3	3	Q7Z794; P35908; P04264	Q7Z794; P35908; P04264	0	2	0.8095	0	1	1	738.396	1475.79	1475.79	0.19	0.00014	HCD (High Energy Collision Dissociation)	MS2	1.65039	9.64	39.8441	24848	01082019_Fusion_MASSFIITB_307198_S3.raw	F3			84	FALSE	55	37	1.25761e-07	0	1.019e-05	3268648192	39.33	Mascot (A5)			Mascot (A5)	cot (A5)	ot (A5)	ot (A5)	0.19
		FALSE	High	Sequest HT (A2)	Unambiguous	[R].FLEQQNQVLQTK.[W]		3	3	Q7Z794; P35908; P04264	Q7Z794; P35908; P04264	0	2	0.6643	0	1	1	738.396	1475.79	1475.79	0.18	0.00013	HCD (High Energy Collision Dissociation)	MS2	1.31748	8.185	39.8054	24564	01082019_Fusion_MASSFIITB_307198_S4.raw	F4		2.83		FALSE				0	1.023e-05	4519849984	39.37	Sequest HT (A2)			Sequest HT (A2	uest HT	est HT	est HT	0.18
		FALSE	High	Mascot (A5)	Unambiguous	[R].FLEQQNQVLQTK.[W]		3	3	Q7Z794; P35908; P04264	Q7Z794; P35908; P04264	0	2	0.809	0	1	1	738.396	1475.79	1475.79	0.18	0.00013	HCD (High Energy Collision Dissociation)	MS2	1.31748	8.185	39.8054	24564	01082019_Fusion_MASSFIITB_307198_S4.raw	F4			89	FALSE	55	37	4.1452e-08	0	1.079e-05	4519849984	39.37	Mascot (A5)			Mascot (A5)	cot (A5)	ot (A5)	ot (A5)	0.18
		FALSE	High	Mascot (A5)	Unambiguous	[R].FLEQQNQVLQTK.[W]		3	3	Q7Z794; P35908; P04264	Q7Z794; P35908; P04264	0	2	0.8481	0	1	1	738.397	1475.79	1475.79	1.34	0.00099	HCD (High Energy Collision Dissociation)	MS2	12.3646	25.557	39.1648	23725	01082019_Fusion_MASSFIITB_307198_S1.raw	F1			79	FALSE	54	36	3.45316e-07	0	1.241e-05	1006419200	39.34	Mascot (A5)			Mascot (A5)	cot (A5)	ot (A5)	ot (A5)	1.34
		FALSE	High	Sequest HT (A2)	Unambiguous	[R].FLEQQNQVLQTK.[W]		3	3	Q7Z794; P35908; P04264	Q7Z794; P35908; P04264	0	2	0.6719	0	1	1	738.396	1475.79	1475.79	-0.12	-9e-05	HCD (High Energy Collision Dissociation)	MS2	0	26.372	39.8175	24205	01082019_Fusion_MASSFIITB_307198_S2.raw	F2		2.53		FALSE				0	1.417e-05	1974388608	39.31	Sequest HT (A2)			Sequest HT (A2	uest HT	est HT	est HT	-0.12
		FALSE	High	Sequest HT (A2)	Unambiguous	[R].FLEQQNQVLQTK.[W]		3	3	Q7Z794; P35908; P04264	Q7Z794; P35908; P04264	0	2	0.6711	0	1	1	738.397	1475.79	1475.79	1.34	0.00099	HCD (High Energy Collision Dissociation)	MS2	12.3646	25.557	39.1648	23725	01082019_Fusion_MASSFIITB_307198_S1.raw	F1		2.98		FALSE				0	1.904e-05	1006419200	39.34	Sequest HT (A2)			Sequest HT (A2	uest HT	est HT	est HT	1.34
		FALSE	High	Sequest HT (A2)	Unambiguous	[R].FLEQQNQVLQTK.[W]		3	3	Q7Z794; P35908; P04264	Q7Z794; P35908; P04264	0	2	0.5895	0	1	1	738.396	1475.78	1475.79	-0.42	-0.00031	HCD (High Energy Collision Dissociation)	MS2	8.15326	21.69	39.8218	24257	01082019_Fusion_MASSFIITB_307198_S5.raw	F5		2.85		FALSE				0	2.213e-05	2144869888	39.32	Sequest HT (A2)			Sequest HT (A2	uest HT	est HT	est HT	-0.42
		FALSE	High	Mascot (A5)	Unambiguous	[R].FLEQQNQVLQTK.[W]		3	3	Q7Z794; P35908; P04264	Q7Z794; P35908; P04264	0	2	0.8871	0	1	1	738.396	1475.79	1475.79	-0.07	-5e-05	HCD (High Energy Collision Dissociation)	MS2	39.8085	30	41.2416	25451	01082019_Fusion_MASSFIITB_307198_S5.raw	F5			62	FALSE	55	37	1.97945e-05	0	2.437e-05			Mascot (A5)			Mascot (A5)	cot (A5)	ot (A5)	ot (A5)	-0.07
		FALSE	High	Mascot (A5)	Unambiguous	[R].FLEQQNQVLQTK.[W]		3	3	Q7Z794; P35908; P04264	Q7Z794; P35908; P04264	0	2	0.7857	0	1	1	738.397	1475.79	1475.79	1.08	0.0008	HCD (High Energy Collision Dissociation)	MS2	8.8794	23.5	39.1667	24265	01082019_Fusion_MASSFIITB_307198_S3.raw	F3			98	FALSE	54	37	5.32421e-09	0	2.57e-05	3268648192	39.33	Mascot (A5)			Mascot (A5)	cot (A5)	ot (A5)	ot (A5)	1.08
		FALSE	High	Mascot (A5)	Unambiguous	[R].FLEQQNQVLQTK.[W]		3	3	Q7Z794; P35908; P04264	Q7Z794; P35908; P04264	0	2	0.7975	0	1	1	738.396	1475.79	1475.79	-0.12	-9e-05	HCD (High Energy Collision Dissociation)	MS2	0	26.372	39.8175	24205	01082019_Fusion_MASSFIITB_307198_S2.raw	F2			79	FALSE	54	37	4.09553e-07	0	2.948e-05	1974388608	39.31	Mascot (A5)			Mascot (A5)	cot (A5)	ot (A5)	ot (A5)	-0.12
		FALSE	High	Sequest HT (A2)	Unambiguous	[R].FLEQQNQVLQTK.[W]		3	3	Q7Z794; P35908; P04264	Q7Z794; P35908; P04264	0	2	0.4783	0	1	1	738.396	1475.79	1475.79	-0.07	-5e-05	HCD (High Energy Collision Dissociation)	MS2	39.8085	30	41.2416	25451	01082019_Fusion_MASSFIITB_307198_S5.raw	F5		2.53		FALSE				0	3.343e-05			Sequest HT (A2)			Sequest HT (A2	uest HT	est HT	est HT	-0.07
		FALSE	High	Mascot (A5)	Unambiguous	[R].FLEQQNQVLQTK.[W]		3	3	Q7Z794; P35908; P04264	Q7Z794; P35908; P04264	0	2	0.8732	0	1	1	738.396	1475.78	1475.79	-0.21	-0.00015	HCD (High Energy Collision Dissociation)	MS2	15.0317	30	39.8175	22421	01082019_Fusion_MASSFIITB_307198_S6.raw	F6			71	FALSE	54	36	2.57387e-06	0	3.71e-05	767441152	39.32	Mascot (A5)			Mascot (A5)	cot (A5)	ot (A5)	ot (A5)	-0.21
		FALSE	High	Sequest HT (A2)	Unambiguous	[R].FLEQQNQVLQTK.[W]		3	3	Q7Z794; P35908; P04264	Q7Z794; P35908; P04264	0	2	0.6049	0	1	1	738.397	1475.79	1475.79	1.48	0.00109	HCD (High Energy Collision Dissociation)	MS2	19.1098	28.107	48.6691	32306	01082019_Fusion_MASSFIITB_307198_S4.raw	F4		2.43		FALSE				0	4.089e-05	13934866	48.74	Sequest HT (A2)			Sequest HT (A2	uest HT	est HT	est HT	1.48
		FALSE	High	Mascot (A5)	Unambiguous	[R].FLEQQNQVLQTK.[W]		3	3	Q7Z794; P35908; P04264	Q7Z794; P35908; P04264	0	2	0.8523	0	1	1	738.397	1475.79	1475.79	1.39	0.00102	HCD (High Energy Collision Dissociation)	MS2	25.6538	30	39.1461	23683	01082019_Fusion_MASSFIITB_307198_S5.raw	F5			88	FALSE	54	36	4.64747e-08	0	6.131e-05	2144869888	39.32	Mascot (A5)			Mascot (A5)	cot (A5)	ot (A5)	ot (A5)	1.39
		FALSE	High	Sequest HT (A2)	Unambiguous	[R].FLEQQNQVLQTK.[W]		3	3	Q7Z794; P35908; P04264	Q7Z794; P35908; P04264	0	2	0.6423	0	1	1	738.399	1475.79	1475.79	3.69	0.00272	HCD (High Energy Collision Dissociation)	MS2	49.0239	30	39.1421	23619	01082019_Fusion_MASSFIITB_307198_S2.raw	F2		2.74		FALSE				0	8.297e-05	1974388608	39.31	Sequest HT (A2)			Sequest HT (A2	uest HT	est HT	est HT	3.69
		FALSE	High	Mascot (A5)	Unambiguous	[R].FLEQQNQVLQTK.[W]		3	3	Q7Z794; P35908; P04264	Q7Z794; P35908; P04264	0	2	0.8393	0	1	1	738.399	1475.79	1475.79	3.69	0.00272	HCD (High Energy Collision Dissociation)	MS2	49.0239	30	39.1421	23619	01082019_Fusion_MASSFIITB_307198_S2.raw	F2			56	FALSE	54	36	7.29305e-05	0	0.0001602	1974388608	39.31	Mascot (A5)			Mascot (A5)	cot (A5)	ot (A5)	ot (A5)	3.69
		FALSE	High	Mascot (A5)	Unambiguous	[R].FLEQQNQVLQTK.[W]		3	3	Q7Z794; P35908; P04264	Q7Z794; P35908; P04264	0	2	0.8667	0	1	1	738.398	1475.79	1475.79	2.02	0.00149	HCD (High Energy Collision Dissociation)	MS2	13.1405	30	39.1258	24014	01082019_Fusion_MASSFIITB_307198_S4.raw	F4			60	FALSE	54	36	3.23552e-05	0	0.00022	4519849984	39.37	Mascot (A5)			Mascot (A5)	cot (A5)	ot (A5)	ot (A5)	2.02
		FALSE	High	Mascot (A5)	Unambiguous	[R].FLEQQNQVLQTK.[W]		3	3	Q7Z794; P35908; P04264	Q7Z794; P35908; P04264	0	2	0.8966	0	1	1	738.396	1475.79	1475.79	0.2	0.00014	HCD (High Energy Collision Dissociation)	MS2	0	30	40.5034	24796	01082019_Fusion_MASSFIITB_307198_S2.raw	F2			58	FALSE	55	37	5.12324e-05	0	0.0002617	1974388608	39.31	Mascot (A5)			Mascot (A5)	cot (A5)	ot (A5)	ot (A5)	0.2
		FALSE	High	Sequest HT (A2)	Unambiguous	[R].FLEQQNQVLQTK.[W]		3	3	Q7Z794; P35908; P04264	Q7Z794; P35908; P04264	0	2	0.7108	0	1	1	738.396	1475.79	1475.79	0.2	0.00014	HCD (High Energy Collision Dissociation)	MS2	0	30	40.5034	24796	01082019_Fusion_MASSFIITB_307198_S2.raw	F2		3.25		FALSE				0	0.0002739	1974388608	39.31	Sequest HT (A2)			Sequest HT (A2	uest HT	est HT	est HT	0.2
		FALSE	High	Sequest HT (A2)	Selected	[R].FLEQQNQVLQTK.[W]		3	3	Q7Z794; P35908; P04264	Q7Z794; P35908; P04264	0	2	0.5758	0	1	1	738.397	1475.79	1475.79	0.79	0.00058	HCD (High Energy Collision Dissociation)	MS2	18.5533	23.5	41.3244	25893	01082019_Fusion_MASSFIITB_307198_S4.raw	F4		2.31		FALSE				0	0.0004261	52183980	40.91	Sequest HT (A2)			Sequest HT (A2	uest HT	est HT	est HT	0.79
		FALSE	High	Mascot (A5)	Selected	[R].FLEQQNQVLQTK.[W]		3	3	Q7Z794; P35908; P04264	Q7Z794; P35908; P04264	0	2	0.8615	0	1	1	738.396	1475.78	1475.79	-0.79	-0.00058	HCD (High Energy Collision Dissociation)	MS2	21.2248	30	39.8423	23212	01082019_Fusion_MASSFIITB_307198_S8.raw	F8			65	FALSE	54	37	1.07152e-05	0	0.0005233	549508352	39.38	Mascot (A5)			Mascot (A5)	cot (A5)	ot (A5)	ot (A5)	-0.79
[truncated: 5,363 more rows]
[truncated: 18 more columns]
