# Supplementary material for: Role of identified proteins in the proteome profiles of CDK4/6 inhibitor-resistant breast cancer cell lines
Source: Royal Society of Chemistry journal article supplement (doi:10.1039/d2mo00285j), 2023-03-07
Supplement: d2mo00285j6.pdf [file d2mo00285j6.pdf]

**Supplementary Table – 2:** List of down-regulated proteins in Ab-R-MCF-7 and their references.

| Down-regulated Protein | Ab-R-MCF-7/MCF-7-fold Change Set-1 | Ab-R-MCF-7/MCF-7-fold Change Set-2 | Roles of proteins in Cancers therapy resistance as reported                                                                                                                                                                                                                                                                       | References ID PubMed             |
|------------------------|------------------------------------|------------------------------------|-----------------------------------------------------------------------------------------------------------------------------------------------------------------------------------------------------------------------------------------------------------------------------------------------------------------------------------|----------------------------------|
| SERPINB6               | 0.438685925                        | 0.46332484                         | Lack of expression for HNRNPH1 and SERPINB6 proteins are new candidate biomarkers of colon cancer.Krasnov GS et al 2009.                                                                                                                                                                                                          | PMID: 19425502<br>PMID: 26956414 |
| NUDT5                  | 0.707536232                        | 0.69188406                         | Low NUDT5 expression is associated with poor overall survival rates and tumor grade was a factor that influenced the expression level of NUDT5. Wang Y. et al 2017.                                                                                                                                                               | PMID: 29113256                   |
| S100A9                 | 0.791461412                        | 0.49589491                         | Expression of S100A9 is overexpressed in Er-ve, Pr-ve and Her-2 +ve BC means it has inverse relation with hormone +ve cells. Bao Yi. et al 2016.                                                                                                                                                                                  | PMID: 26998104                   |
| TGM3                   | 0.785177767                        | 0.80620931                         | TGM3, as a candidate tumor suppressor, contributes to the carcinogenesis and development of HNC and may serve as a useful biomarker for patients with HNC.Wu X et al 2013.                                                                                                                                                        | PMID: 24289313                   |
| PEPD                   | 0.81853713                         | 0.14879955                         | PEPD inhibites to Her-2 which is found overexpressed in a Breast Cancer subclass. Down-regulation of PEPD may be a reagon to develop a drug resistance in that class of BC.                                                                                                                                                       | PMID: 30674653<br>PMID: 26086037 |
| DLD                    | 0.647584973                        | 0.41800835                         | Dihydroliipoamide dehydrogenase DLD proteins were found differentially expressed (down-regulated) in the breast cancer tumor.Abdullah Al-Dhabi N et al 2016.                                                                                                                                                                      | PMID: 27110560                   |
| SERPINB1               | 0.709618875                        | 0.49682396                         | Elevated expression levels of CLMN, SERPINB1, and KLK6 are associated with prolonged relapse-free survival for breast cancer patients.Sheng L. et al 2016. Inhibitory role of SERPINB1 in the migration and invasion of HCC, implying that SERPINB1 might be a potential prognostic indicator of HCC metastasis.Cui X et al 2014. | PMID: 26485663<br>PMID: 24105272 |
| PDIA4                  | 0.515227717                        | 0.2774518                          | Down-regulated PDIA4 predicted DFS and OS.PDIA4, could be therapeutic targets or biomarkers for managing Ovarian Cancer.Yin F et al 2019.                                                                                                                                                                                         | PMID: 30335894                   |
| RPIA                   | 0.521825397                        | 0.50132275                         | Deregulation of ribose-5-phosphate isomerase A (RPIA) in the pentose phosphate pathway (PPP) is known to promote tumorigenesis in liver, lung, and breast tissues.                                                                                                                                                                |                                  |
| ABAT                   | 0.473042949                        | 0.15900091                         | Decreased expression of ABAT and STC2 hallmarks ER-positive inflammatory breast cancer and endocrine therapy resistance in advanced disease(Jansen MP et al 2015)                                                                                                                                                                 | PMID: 25771305                   |
| GLB1                   | 0.441385639                        | 0.20325763                         | Increased GLB1 is a valuable marker in formalin-fixed paraffin-embedded (FFPE) tissues for the senescence-like phenotype and associates with improved cancer outcomes. Wagner J. et al 2015.                                                                                                                                      | PMID: 25876105                   |
| HSPD1                  | 0.615284412                        | 0.33868867                         | The novel prognostic marker, EHMT2, is involved in cell proliferation via HSPD1 regulation in breast cancer.Kim SK et al 2019.                                                                                                                                                                                                    | PMID: 30365075                   |
| ACTN1                  | 0.682649988                        | 0.36831133                         | siRNAs targeting CTNNB1, TLN1, VCL, PXN, and ACTN1 genes significantly decreased the tumor burden at all time points. Ashaie MA et al 2019, Increased $\alpha$ -actinin-1 destabilizes E-cadherin-based adhesions and associates with poor prognosis in basal-like breast cancer. Kovac B et al 2018.                             | PMID: 31269666<br>PMID: 29742177 |
| PSMB3                  | 0.779322117                        | 0.41550841                         | Down-regulation of IDH3A and PSMB3 were revealed as trisomy-associated alterations involved in regulating genome stability.Gemoll T et al 2013.                                                                                                                                                                                   | PMID: 24464829                   |

|          |             |            |                                                                                                                                                                                                                                                                                             |                                   |
|----------|-------------|------------|---------------------------------------------------------------------------------------------------------------------------------------------------------------------------------------------------------------------------------------------------------------------------------------------|-----------------------------------|
| ATP1B1   | 0.620751802 | 0.48918641 | Na(+)-K(+) ATPase B1 can synergize with ADM and reverse drug resistance to ADM in the MCF-7/ADM cell line. Qi YY et al 2009. Altered expression of the genes Atp1b1, CARD 10, KLF4, Spint2, and Acly may play a role in the aggressive phenotype seen in breast cancer Yancy HF et al 2007. | PMID: 19664334<br>PMID: 17472751  |
| CD276    | 0.788940359 | 0.50434279 | B7-H3 (CDC276) is an important immune checkpoint member of the B7 family and inhibits T-cell mediated antitumor immunity. Pizon M et al 2018.                                                                                                                                               | PMID: 30226585                    |
| STOM     | 0.392105263 | 0.55894737 | Decreased expression of stomatin predicts poor prognosis in HER2-positive breast cancer. Chen CY et al 2016.                                                                                                                                                                                | PMID: 27577936                    |
| M6PR     |             | 0.61196683 | Low-level expression of mannose-6-phosphate receptor (M6PR) correlated with poor patient prognosis in Breast cancer. Esseghir S et al 2006, Caixeiro NJ et al 2013.                                                                                                                         | PMID: 17054309,<br>PMID: 23686499 |
| PRCP     | 0.698971722 | 0.61465296 | The prolyl peptidases PRCP/PREP regulate IRS-1 stability critical for rapamycin-induced feedback activation of PI3K and AKT.                                                                                                                                                                |                                   |
| GGCT     | 0.842055485 | 0.63461539 | Downregulation of gamma-glutamyl cyclotransferase (GGCT), a critical component of GSH pathway, contribute to chemoresistance in breast cancer. Wang Z et al 2015, Ran R et al 2015.                                                                                                         | PMID: 25818003<br>PMID: 25256603  |
| TUFM     | 0.482295167 | 0.72576893 | TUFM downregulation induces epithelial-mesenchymal transition and invasion in lung cancer cells via a mechanism involving AMPK-GSK3 $\beta$ signaling. He K et al 2016.                                                                                                                     | PMID: 26781467                    |
| SELENBP1 | 0.518987342 |            | Low SELENBP1 expression in ER(+) breast cancer patients was significantly associated with poor survival and SELENBP1 levels progressively decreased with advancing clinical stages of breast cancer. Zhang S et al 2013, Wang Y et al 2015.                                                 | PMID: 23704933,<br>PMID: 25445402 |
