# Supplementary material for: Role of identified proteins in the proteome profiles of CDK4/6 inhibitor-resistant breast cancer cell lines
Source: Royal Society of Chemistry journal article supplement (doi:10.1039/d2mo00285j), 2023-03-07
Supplement: d2mo00285j7.pdf [file d2mo00285j7.pdf]

**Supplementary Table – 3:** List of Up-regulated genes in Ab-R-MCF-7 cells and their references.

| Up-regulated Protein | Ab-R-MCF-7/MCF-7 fold Change Set11 | Ab-R-MCF-7/MCF-7 fold Change Set-2 | Roles of proteins in Cancers therapy resistance as reported.                                                                                                                                                                                                      | References from PubMed           |
|----------------------|------------------------------------|------------------------------------|-------------------------------------------------------------------------------------------------------------------------------------------------------------------------------------------------------------------------------------------------------------------|----------------------------------|
| SBSN                 | 2.557142857                        | 3.45                               | The association of SBSN expression with progressive stages of cancer development indicates its role in cancer evolution and therapy resistance. Hubackova S et al 2019.                                                                                           | PMID: 30919591<br>PMID: 29301256 |
| DSC1                 | 1.147208122                        | 1.54720812                         | The increased expression of DSC1 can promote the occurrence of HNSCC and is associated with tumor. The increased expression of DSC1 also indicates a poor prognosis of the patients with HNSCC. Wang Y. et al 2016.                                               | PMID: 27601166<br>PMID: 29798048 |
| LCN1                 | 1.240066225                        | 2.26655629                         | Identification of LCN1 as a Potential Biomarker for Breast Cancer by Bioinformatic Analysis Yang Y. et al 2019.                                                                                                                                                   | PMID: 31424267                   |
| S100A7               | 1.590138675                        | 1.91371341                         | OLF4, LY6D and S100A7 as potent markers for distant metastasis in estrogen receptor-positive breast carcinoma. Mayama A. et. Al. 2018.                                                                                                                            | PMID: 30137688                   |
| DCD                  | 1.51584507                         | 2.08274648                         | DCD levels may increase in early carcinogenesis, particularly among more aggressive forms of breast cancer. Brauer HA et al 2014. Dermcidin exerts its oncogenic effects in breast cancer via modulation of ERBB signaling. Bancovik J. et al 2015.               | PMID: 24562771<br>PMID: 25879571 |
| PIP                  | 2.232014388                        | 2.19784173                         | The potential role for prolactin-inducible protein (PIP) as a marker of human breast cancer micrometastasis. Clark JW et al 1999.                                                                                                                                 | PMID: 10576657                   |
| GAPDH                | 2.177158774                        | 1.3643454                          | Various study have described GAPDH as a regulator of cell death and suggested that GAPDH participates in tumor progression. Zhang JY et al 2015.                                                                                                                  | PMID: 25859407                   |
| IGHG1                |                                    | 3.24581006                         | IGHG1 provided high prognostic value in TNBC for both OS and DFS, representing an easily measurable molecular prognostic marker. Yeong J et al 2018                                                                                                               | PMID: 29899747                   |
| IGLL5                |                                    | 2.56074766                         | Rearrangements occurring in IGLL5 might be linked to the process of metastasis. Feng Liang et al 2015                                                                                                                                                             | PMID: 26311227                   |
| A2M                  | 2.280182232                        | 1.67312073                         | This study showed a strong association of FN1, A2M, C4BPA and CFB in molecular subtypes of BC, in which, C4BPA and A2M demonstrated a potent signature in blood plasma and tissue samples of LB and TN subtypes in BC patients, respectively. Suman S et al 2016. | PMID: 27498393                   |
| HABP2                | 2.946524064                        | 4.41176471                         | HABP2 and LINC01483 represent putative new breast cancer susceptibility loci, because both loci were associated with breast cancer. Brand JS et al 2017.                                                                                                          | PMID: 29665850                   |
| PEBP1                |                                    | 15.6590437                         | Downregulation of RKIP plays an important role in the breast neoplastic progression and correlates with poor prognosis in patients with BC. Kim GE et al 2017.                                                                                                    | PMID: 26894644                   |
| MUC1                 | 1.802958015                        |                                    | The combination therapy based on anti-MUC1 antibody and novel OM-86II inhibited the proliferation of MCF-7 breast cancer cells. Gornowicz A et al 2019.                                                                                                           | PMID: 31524251                   |
| PSMA6                |                                    | 2.13408876                         | mRNA expression levels of PSMA1-7 were significantly upregulated in breast, lung, gastric, bladder and head and neck cancer compared with normal tissues. Li Y et al 2017                                                                                         | PMID: 27966459                   |
| ETFDH                | 2.286184211                        | 2.60197368                         | Expression of RTN4, SON, IGF1R, SNRPE, PTGR1, PLEK, and ETFDH was associated with a decrease in survival time of Bladder cancer patient. Tapak L et al 2015.                                                                                                      | PMID: 25907251                   |

|          |             |            |                                                                                                                                                                                                                                                                                                                                                                                                                                                                                                  |                                  |
|----------|-------------|------------|--------------------------------------------------------------------------------------------------------------------------------------------------------------------------------------------------------------------------------------------------------------------------------------------------------------------------------------------------------------------------------------------------------------------------------------------------------------------------------------------------|----------------------------------|
| VTN      | 1.835112693 |            | VEGFR2 positively regulate the expression of VTN in gastric cancer. VTN promoted the growth and metastasis of gastric cancer cells, VTN act as a poor prognostic factor both for disease-free survival and overall survival in gastric cancer. Lian L et al 2019.                                                                                                                                                                                                                                | PMID: 30819137                   |
| HIST1H4A | 1.658914729 | 1.9379845  | HIST1H4A was found to be expressed in exosomes at more than 5-fold higher level as compared to total cellular membrane proteins in Non-Small Cell Lung Carcinoma Cells.Pan D et al 2019.                                                                                                                                                                                                                                                                                                         | PMID: 30646616                   |
| HSP90B1  |             | 1.54468912 | The overexpression of Hsp90B1 is associated with tumorigenesis of canine mammary glands. Sunil Kumar BV et al 2018.<br>Proteomic analyses reveal high expression of decorin and endoplasmin (HSP90B1) are associated with breast cancer metastasis and decreased survival.Cawthorn TR et al 2012.                                                                                                                                                                                                | PMID: 28801701<br>PMID: 22363530 |
| TXNRD1   |             | 5.41954023 | Overexpression of TXNRD1 is associated with breast cancer progression. Shin B. et al 2019. TXNRD1 and TXNIP are associated with prognosis in breast cancer, and ERBB2 seems to be one of the factors shifting balances of both factors of the redox control system in a prognostic unfavorable manner.Cadenas C et al 2010.                                                                                                                                                                      | PMID: 31430859<br>PMID: 20584310 |
| KDELRL1  |             | 2.20192308 | NPAS2 is a risk biomarker in human cancers and plays a role in tumorigenesis by affecting cancer-related gene expression, and relevant biological pathways. NPAS2 promote the expression of KDELRL1 gene have a known role in tumorigenesis. Yi CH et al 2009.                                                                                                                                                                                                                                   | PMID: 19457610                   |
| SERPINH1 |             | 1.75696203 | HSP47 is encoded by the SERPINH1 gene, the altered expression levels of HSP47 have been correlated with several types of cancer, such as cervical, breast, pancreatic and gastric cancers. Studies have shown that HSP47 promotes tumor angiogenesis, growth, migration and metastatic capacity. Duarte BDP et al 2018.Clinically, increased expression of Hsp47 and reduced levels of miR-29b and -29c were associated with poor survival outcomes in breast cancer patients. Zhu J et al 2015. | PMID: 30128672<br>PMID: 25744716 |
| SLC38A1  | 1.788990826 | 4.55504587 | The cross-talk between Akt signaling and SNAT1/SLC38A1 might play a critical role in the development and progression of breast cancer. SNAT1 was up-regulated in breast cancer cell lines and breast cancer tissues.Wang K et al 2013.                                                                                                                                                                                                                                                           | PMID: 23848995                   |
| AHCY     | 1.537782139 | 1.30127576 | Down-regulation of AHCY effectively suppressed cell proliferation by regulating the MEK/ERK signaling pathway and through cell cycle arrests at G2/M phase. Park SJ et al 2015.                                                                                                                                                                                                                                                                                                                  | PMID: 26328244                   |
| HSD17B10 | 1.889186475 |            | HSD17B10 gene expression was up-regulated in poor responders and that immunohistochemistry expression of HSD17B10 on biopsy before treatment was correlated to response to chemotherapy. Salas S et al 2009. Overexpression of HSD10 accelerates pheochromocytoma cell growth, enhances cell respiration, and increases cellular resistance to cell death induction. Carlson EA et al 2015.                                                                                                      | PMID: 19449377<br>PMID: 25879199 |
| CNDP2    | 2.242424242 |            | Knockdown of CNDP2 can inhibit the proliferation of colon cancer in vitro and retarded carcinogenesis in vivo. Xue C et al 2014.                                                                                                                                                                                                                                                                                                                                                                 | PMID: 24885395                   |
| SLC2A1   | 2.214285714 |            | High GLUT1 expression is associated with increased malignant potential, invasiveness and poor prognosis in some cancers including breast cancer.de Castro TB et al 2018.                                                                                                                                                                                                                                                                                                                         | PMID: 30360728                   |
| PSMB4    | 1.59978308  |            | PSMB4 overexpression enhances the cell growth and viability of breast cancer cells leading to a poor prognosis.Wang H et al 2018.                                                                                                                                                                                                                                                                                                                                                                | PMID: 30066880                   |

|        |             |            |                                                                                                                                                                                                              |                |
|--------|-------------|------------|--------------------------------------------------------------------------------------------------------------------------------------------------------------------------------------------------------------|----------------|
| CD9    | 2.225207933 | 1.39603327 | Within the tumor microenvironment, CD9 is responsible for the crosstalk between BMSCs and HCC1806 breast cancer cells (via CCL5, CCR5, and CXCR12) which contributes to chemoresistance. Ullah M et al 2019. | PMID: 31191817 |
| MAL2   | 1.360277136 | 1.55704388 | MAL2 promotes proliferation, migration, and invasion through regulating epithelial-mesenchymal transition in breast cancer cell lines. Bhandari A et al 2018.                                                | PMID: 30195491 |
| NAGLU  | 1.458125849 | 1.61611589 | Overexpression of NAGLU-IKZF3 enhanced migration of CRC cells. Choi Y et al 2018.                                                                                                                            | PMID: 29955133 |
| MT-ND4 |             | 1.62234043 | Mutations in MT-ND4 and mtDNA depletion have been reported to be involved in cisplatin resistance. van Gisbergen MW et al 2015.                                                                              | PMID: 26041263 |
| PDIA3  |             | 3.1521197  | PDIA3 expression is associated with tumor proliferation and decreased apoptosis in HCC, and that increased expression of PDIA3 predicts poor prognosis. Takata H. et al 2016.                                | PMID: 28101228 |
| PPP1CA |             | 3.56963351 | USP11 promotes growth and metastasis of colorectal cancer via PPP1CA-mediated activation of ERK/MAPK signaling pathway. Sun H. et al 2019.                                                                   | PMID: 31521612 |
| ATP1A1 |             | 3.76406713 | overexpression of the ATP1A1 and down-regulation of the ATP1A2 in Breast cancer. Alexey Bogdanov. et al 2017                                                                                                 | PMID: 28529692 |
| CLPTM1 |             | 3.77667141 | Single nucleotide polymorphisms (SNPs) in genes encoding telomere-associated proteins (RTEL1 and TERT-CLPTM1) as markers of cancer risk. Mirabello L et al 2010.                                             | PMID: 20597107 |
| HPRT1  | 28          | 53.0210526 | HPRT1 is a common salvage housekeeping gene with a historically important role in cancer as a mutational biomarker. Michelle H Townsend et al 2018.                                                          | PMID: 29730818 |
