# Supplementary material for: Role of identified proteins in the proteome profiles of CDK4/6 inhibitor-resistant breast cancer cell lines
Source: Royal Society of Chemistry journal article supplement (doi:10.1039/d2mo00285j), 2023-03-07
Supplement: d2mo00285j8.pdf [file d2mo00285j8.pdf]

**Supplementary Table – 4:** List of down-regulated Proteins in Pb-R-MCF-7 cells and their references.

| Down-regulated Protein | Pb-R-MCF-7/MCF-7 fold Change Set-1 | Pb-R-MCF-7/MCF-7 fold Change Set-2 | Roles of proteins in Cancers therapy resistance as reported                                                                                                                          | References ID PubMed             |
|------------------------|------------------------------------|------------------------------------|--------------------------------------------------------------------------------------------------------------------------------------------------------------------------------------|----------------------------------|
| NUDT5                  | 0.220657277                        | 0.284037559                        | Low NUDT5 expression is associated with poor overall survival rates and tumor grade was a factor that influenced the expression level of NUDT5. Wang Y. et al 2017.                  | PMID: 29113256                   |
| AMY1A                  | 0.70341854                         | 0.305512781                        | AMY1A is a stem cell differentiation marker were found downregulated.Srinivasan PP. et al. 2017                                                                                      | PMID:28170182                    |
| S100A9                 |                                    | 0.306744488                        | Expression of S100A9 is over-expressed in in Er-ve, Pr-ve and Her-2 +ve BC means it has inverse relation with hormone p+ve cells. Bao YI. et al 2016.                                | PMID: 26998104                   |
| CAT                    | 0.251559252                        | 0.442827443                        | Catalase expression in MCF-7 breast cancer cells is mainly controlled by PI3K/Akt/mTorsignaling pathway. Glorieux C. et. al 2014                                                     | PMID: 24630930                   |
| TGM3                   | 0.205263158                        | 0.548947368                        | TGM3, as a candidate tumor suppressor, contributes to the carcinogenesis and development of HNC and may serve as a useful biomarker for patients with HNC.Wu X et al 2013.           | PMID: 24289313                   |
| PEPD                   | 0.28280543                         | 0.592760181                        | PEPD inhibites to Her-2 which is found overexpressed in a Breast Cancer subclass. Down-regulation of PEPD may be a reagon to develop a drug resistance in that class of BC.          | PMID: 30674653<br>PMID: 26086037 |
| DLD                    | 0.383050847                        |                                    | Dihydrolipoamide dehydrogenase DLD proteins were found differentially expressed (down-regulated) in the breast cancer tumor.Abdullah Al-Dhabi N et al 2016.                          | PMID: 27110560                   |
| GGCT                   |                                    | 0.618104668                        | Downregulation of gamma-glutamyl cyclotransferase (GGCT), a critical components of GSH pathway, contribute to chemoresistance in breast cancer. Wang Z et al 2015, Ran R et al 2015. |                                  |
