# Supplementary figures and images for: Role of identified proteins in the proteome profiles of CDK4/6 inhibitor-resistant breast cancer cell lines
Source: Royal Society of Chemistry journal article supplement (doi:10.1039/d2mo00285j), 2023-03-07

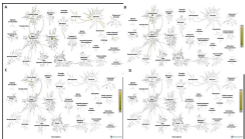

Supplement: d2mo00285j1.pdf [file d2mo00285j1.pdf]

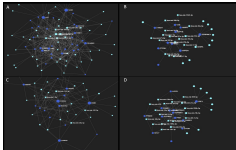

Supplement: d2mo00285j3.pdf [file d2mo00285j3.pdf]
